# Supplementary material for: A functional screen of RNA binding proteins identifies genes that promote or limit the accumulation of CD138+ plasma cells
Source: eLife. 2022 Apr 22;11:e72313. doi: 10.7554/eLife.72313 (PMC9106329; doi:10.7554/eLife.72313)
Supplement: Supplementary file 1. [file elife-72313-supp1.xlsx]

## Sheet: 1A - targeted RBPs
Gene symbol	ENSEMBLID
1110004F10Rik	ENSMUSG00000030663
1810009A15Rik	ENSMUSG00000071653
2210010C04Rik	ENSMUSG00000029882
2210016L21Rik	ENSMUSG00000029559
2410004B18Rik	ENSMUSG00000036873
2810006K23Rik	ENSMUSG00000047635
A1cf	ENSMUSG00000052595
Aatf	ENSMUSG00000018697
Abcf1	ENSMUSG00000038762
Abcf2	ENSMUSG00000028953
Abt1	ENSMUSG00000036376
Acadm	ENSMUSG00000062908
Acin1	ENSMUSG00000022185
Aco1	ENSMUSG00000028405
Adad1	ENSMUSG00000027719
Adad2	ENSMUSG00000024266
Adar	ENSMUSG00000027951
Adarb1	ENSMUSG00000020262
Adarb2	ENSMUSG00000052551
Aen	ENSMUSG00000030609
Afdn	ENSMUSG00000068036
Aff1	ENSMUSG00000029313
Aff2	ENSMUSG00000031189
Aff3	ENSMUSG00000037138
Aff4	ENSMUSG00000049470
Agfg1	ENSMUSG00000026159
Ago1	ENSMUSG00000041530
Ago2	ENSMUSG00000036698
Ahcyl1	ENSMUSG00000027893
Ahnak	ENSMUSG00000069833
AI837181	ENSMUSG00000047423
Aicda	ENSMUSG00000040627
Akap1	ENSMUSG00000018428
Akap17b	ENSMUSG00000059708
Akap8	ENSMUSG00000024045
Akap8l	ENSMUSG00000002625
Aldh2	ENSMUSG00000029455
Aldoa	ENSMUSG00000030695
Alg13	ENSMUSG00000041718
Alkbh1	ENSMUSG00000079036
Alkbh5	ENSMUSG00000042650
Alyref	ENSMUSG00000025134
Alyref2	ENSMUSG00000060244
Angel1	ENSMUSG00000021257
Angel2	ENSMUSG00000026634
Ankrd17	ENSMUSG00000055204
Anp32b	ENSMUSG00000028333
Anxa2	ENSMUSG00000032231
Ap2m1	ENSMUSG00000022841
Apex1	ENSMUSG00000035960
Api5	ENSMUSG00000027193
Apobec1	ENSMUSG00000040613
Apobec2	ENSMUSG00000040694
Apobec4	ENSMUSG00000055547
Aqr	ENSMUSG00000040383
Arcn1	ENSMUSG00000032096
Arhgef28	ENSMUSG00000021662
Arid5a	ENSMUSG00000037447
Arl6ip4	ENSMUSG00000029404
Arpc1b	ENSMUSG00000029622
Ascc3	ENSMUSG00000038774
Atp1a1	ENSMUSG00000033161
Atp2a2	ENSMUSG00000029467
Atp5a1	ENSMUSG00000025428
Atp5b	ENSMUSG00000025393
Atp5c1	ENSMUSG00000025781
Atxn1	ENSMUSG00000046876
Atxn1l	ENSMUSG00000069895
Atxn2	ENSMUSG00000042605
Atxn2l	ENSMUSG00000032637
Auh	ENSMUSG00000021460
Bard1	ENSMUSG00000026196
BC005561	ENSMUSG00000079065
Bcas2	ENSMUSG00000005687
Bclaf1	ENSMUSG00000037608
Bclaf3	ENSMUSG00000044150
Bicc1	ENSMUSG00000014329
Bms1	ENSMUSG00000030138
Boll	ENSMUSG00000025977
Bop1	ENSMUSG00000022557
Brd2	ENSMUSG00000024335
Brix1	ENSMUSG00000022247
Btf3	ENSMUSG00000021660
Bud13	ENSMUSG00000032077
Bud31	ENSMUSG00000038722
Bysl	ENSMUSG00000023988
Bzw1	ENSMUSG00000051223
Bzw2	ENSMUSG00000020547
C1qbp	ENSMUSG00000018446
Cactin	ENSMUSG00000034889
Calr	ENSMUSG00000003814
Caprin1	ENSMUSG00000027184
Caprin2	ENSMUSG00000030309
Carhsp1	ENSMUSG00000008393
Casc3	ENSMUSG00000078676
Ccar1	ENSMUSG00000020074
Ccar2	ENSMUSG00000033712
Ccdc124	ENSMUSG00000007721
Ccdc137	ENSMUSG00000049957
Ccdc59	ENSMUSG00000019897
Ccdc9	ENSMUSG00000041375
Cdc40	ENSMUSG00000038446
Cdc5l	ENSMUSG00000023932
Cdk11b	ENSMUSG00000029062
Cdk13	ENSMUSG00000041297
Cdv3	ENSMUSG00000032803
Cebpz	ENSMUSG00000024081
Celf1	ENSMUSG00000005506
Celf2	ENSMUSG00000002107
Celf3	ENSMUSG00000028137
Celf4	ENSMUSG00000024268
Celf5	ENSMUSG00000034818
Celf6	ENSMUSG00000032297
Cherp	ENSMUSG00000052488
Chmp4b	ENSMUSG00000038467
Chtop	ENSMUSG00000001017
Cir1	ENSMUSG00000041777
Cirbp	ENSMUSG00000045193
Cisd1	ENSMUSG00000037710
Ckap4	ENSMUSG00000046841
Clasp2	ENSMUSG00000033392
Clasrp	ENSMUSG00000061028
Clk1	ENSMUSG00000026034
Clk2	ENSMUSG00000068917
Clk3	ENSMUSG00000032316
Clk4	ENSMUSG00000020385
Clp1	ENSMUSG00000027079
Cmss1	ENSMUSG00000022748
Cmtr1	ENSMUSG00000024019
Cmtr2	ENSMUSG00000046441
Cnbp	ENSMUSG00000030057
Cnn3	ENSMUSG00000053931
Cnot1	ENSMUSG00000036550
Cnot10	ENSMUSG00000056167
Cnot11	ENSMUSG00000003135
Cnot2	ENSMUSG00000020166
Cnot3	ENSMUSG00000035632
Cnot4	ENSMUSG00000038784
Cnot6	ENSMUSG00000020362
Cnot6l	ENSMUSG00000034724
Cnot7	ENSMUSG00000031601
Cnot8	ENSMUSG00000020515
Cnot9	ENSMUSG00000026174
Cnp	ENSMUSG00000006782
Copa	ENSMUSG00000026553
Cpeb1	ENSMUSG00000025586
Cpeb2	ENSMUSG00000039782
Cpeb3	ENSMUSG00000039652
Cpeb4	ENSMUSG00000020300
Cpsf1	ENSMUSG00000034022
Cpsf2	ENSMUSG00000041781
Cpsf3	ENSMUSG00000054309
Cpsf4	ENSMUSG00000029625
Cpsf4l	ENSMUSG00000018727
Cpsf6	ENSMUSG00000055531
Cpsf7	ENSMUSG00000034820
Crnkl1	ENSMUSG00000001767
Cryz	ENSMUSG00000028199
Csdc2	ENSMUSG00000042109
Csde1	ENSMUSG00000068823
Csrp1	ENSMUSG00000026421
Cstf1	ENSMUSG00000027498
Cstf2	ENSMUSG00000031256
Cstf2t	ENSMUSG00000053536
Cstf3	ENSMUSG00000027176
Ctif	ENSMUSG00000052928
Ctnna1	ENSMUSG00000037815
Ctnnb1	ENSMUSG00000006932
Ctnnbl1	ENSMUSG00000027649
Ctnnd1	ENSMUSG00000034101
Cwc15	ENSMUSG00000004096
Cwc22	ENSMUSG00000027014
Cwc25	ENSMUSG00000018541
Cwc27	ENSMUSG00000021715
Cwf19l1	ENSMUSG00000025200
Cwf19l2	ENSMUSG00000025898
Dazap1	ENSMUSG00000069565
Dazl	ENSMUSG00000010592
Dbr1	ENSMUSG00000032469
Dcaf13	ENSMUSG00000022300;ENSMUSG00000106903
Dcp1a	ENSMUSG00000021962
Dcp1b	ENSMUSG00000041477
Dcp2	ENSMUSG00000024472
Dcps	ENSMUSG00000032040
Ddx1	ENSMUSG00000037149
Ddx10	ENSMUSG00000053289
Ddx17	ENSMUSG00000055065
Ddx18	ENSMUSG00000001674
Ddx19a	ENSMUSG00000015023
Ddx19b	ENSMUSG00000033658
Ddx20	ENSMUSG00000027905
Ddx21	ENSMUSG00000020075
Ddx23	ENSMUSG00000003360
Ddx24	ENSMUSG00000041645
Ddx25	ENSMUSG00000032101
Ddx27	ENSMUSG00000017999
Ddx28	ENSMUSG00000045538
Ddx31	ENSMUSG00000026806
Ddx39	ENSMUSG00000005481
Ddx39b	ENSMUSG00000019432
Ddx3x	ENSMUSG00000000787
Ddx3y	ENSMUSG00000069045
Ddx4	ENSMUSG00000021758
Ddx41	ENSMUSG00000021494
Ddx42	ENSMUSG00000020705
Ddx43	ENSMUSG00000070291
Ddx46	ENSMUSG00000021500
Ddx47	ENSMUSG00000030204
Ddx49	ENSMUSG00000057788
Ddx5	ENSMUSG00000020719
Ddx50	ENSMUSG00000020076
Ddx51	ENSMUSG00000029504
Ddx52	ENSMUSG00000020677
Ddx54	ENSMUSG00000029599
Ddx55	ENSMUSG00000029389
Ddx56	ENSMUSG00000004393
Ddx59	ENSMUSG00000026404
Ddx6	ENSMUSG00000032097
Dek	ENSMUSG00000021377
Denr	ENSMUSG00000023106
Dgcr14	ENSMUSG00000003527
Dhx15	ENSMUSG00000029169
Dhx16	ENSMUSG00000024422
Dhx29	ENSMUSG00000042426
Dhx30	ENSMUSG00000032480
Dhx32	ENSMUSG00000030986
Dhx33	ENSMUSG00000040620
Dhx34	ENSMUSG00000006019
Dhx35	ENSMUSG00000027655
Dhx36	ENSMUSG00000027770
Dhx38	ENSMUSG00000037993
Dhx40	ENSMUSG00000018425
Dhx57	ENSMUSG00000035051
Dhx8	ENSMUSG00000034931
Dhx9	ENSMUSG00000042699
Dicer1	ENSMUSG00000041415
Dido1	ENSMUSG00000038914
Diexf	ENSMUSG00000016181
Dimt1	ENSMUSG00000021692
Dis3	ENSMUSG00000033166
Dis3l	ENSMUSG00000032396
Dis3l2	ENSMUSG00000053333
Dkc1	ENSMUSG00000031403
Dlg1	ENSMUSG00000022770
Dnaja1	ENSMUSG00000028410
Dnajc1	ENSMUSG00000026740
Dnajc8	ENSMUSG00000054405
Dnd1	ENSMUSG00000044595
Dnmt1	ENSMUSG00000004099
Dnttip2	ENSMUSG00000039756
Dppa5a	ENSMUSG00000060461
Dpysl2	ENSMUSG00000022048
Dqx1	ENSMUSG00000009145
Drg1	ENSMUSG00000020457
Drg2	ENSMUSG00000020537
Drosha	ENSMUSG00000022191
Dsp	ENSMUSG00000054889
Dst	ENSMUSG00000026131
Dus3l	ENSMUSG00000007603
Dusp11	ENSMUSG00000030002
Dut	ENSMUSG00000027203
Dxo	ENSMUSG00000040482
Dync1h1	ENSMUSG00000018707
Dync1li2	ENSMUSG00000035770
Dynll1	ENSMUSG00000009013
Dzip1	ENSMUSG00000042156
Dzip1l	ENSMUSG00000037784
Dzip3	ENSMUSG00000064061
Ebna1bp2	ENSMUSG00000028729
Edc3	ENSMUSG00000038957
Edc4	ENSMUSG00000036270
Edf1	ENSMUSG00000015092
Eef1a1	ENSMUSG00000037742
Eef1a2	ENSMUSG00000016349
Eef1d	ENSMUSG00000055762
Eef1g	ENSMUSG00000071644
Eef2	ENSMUSG00000034994
Eef2k	ENSMUSG00000035064
Efhd2	ENSMUSG00000040659
Eftud2	ENSMUSG00000020929
Eif1	ENSMUSG00000035530
Eif1a	ENSMUSG00000057561
Eif1ad	ENSMUSG00000024841
Eif1ax	ENSMUSG00000067194
Eif1b	ENSMUSG00000006941
Eif2a	ENSMUSG00000027810
Eif2ak1	ENSMUSG00000029613
Eif2ak2	ENSMUSG00000024079
Eif2ak3	ENSMUSG00000031668
Eif2ak4	ENSMUSG00000005102
Eif2b1	ENSMUSG00000029388
Eif2b2	ENSMUSG00000004788
Eif2b3	ENSMUSG00000028683
Eif2b4	ENSMUSG00000029145
Eif2b5	ENSMUSG00000003235
Eif2d	ENSMUSG00000026427
Eif2s1	ENSMUSG00000021116
Eif2s2	ENSMUSG00000074656
Eif3a	ENSMUSG00000024991
Eif3b	ENSMUSG00000056076
Eif3c	ENSMUSG00000030738
Eif3d	ENSMUSG00000016554
Eif3e	ENSMUSG00000022336
Eif3g	ENSMUSG00000070319
Eif3h	ENSMUSG00000022312
Eif3i	ENSMUSG00000028798
Eif3j1	ENSMUSG00000027236
Eif3j2	ENSMUSG00000043424
Eif3k	ENSMUSG00000053565
Eif3l	ENSMUSG00000033047
Eif3m	ENSMUSG00000027170
Eif4a1	ENSMUSG00000059796
Eif4a2	ENSMUSG00000022884
Eif4a3	ENSMUSG00000025580
Eif4b	ENSMUSG00000058655
Eif4e	ENSMUSG00000028156
Eif4e1b	ENSMUSG00000074895
Eif4e2	ENSMUSG00000026254
Eif4e3	ENSMUSG00000093661
Eif4enif1	ENSMUSG00000020454
Eif4g1	ENSMUSG00000045983
Eif4g2	ENSMUSG00000005610
Eif4g3	ENSMUSG00000028760
Eif4h	ENSMUSG00000040731
Eif5	ENSMUSG00000021282
Eif5a	ENSMUSG00000078812
Eif5a2	ENSMUSG00000050192
Eif5b	ENSMUSG00000026083
Eif6	ENSMUSG00000027613
Elac2	ENSMUSG00000020549
Elavl1	ENSMUSG00000040028
Elavl2	ENSMUSG00000008489
Elavl3	ENSMUSG00000003410
Elavl4	ENSMUSG00000028546
Emg1	ENSMUSG00000004268
Endov	ENSMUSG00000039850
Eno1	ENSMUSG00000063524
Enox1	ENSMUSG00000022012
Enox2	ENSMUSG00000031109
Eprs	ENSMUSG00000026615
Eral1	ENSMUSG00000020832
Eri1	ENSMUSG00000031527
Ern1	ENSMUSG00000020715
Ern2	ENSMUSG00000030866
Erp29	ENSMUSG00000029616
Esf1	ENSMUSG00000045624
Esrp1	ENSMUSG00000040728
Esrp2	ENSMUSG00000084128
Etf1	ENSMUSG00000024360
Ewsr1	ENSMUSG00000009079
Exosc1	ENSMUSG00000034321
Exosc10	ENSMUSG00000017264
Exosc2	ENSMUSG00000039356
Exosc3	ENSMUSG00000028322
Exosc4	ENSMUSG00000034259
Exosc5	ENSMUSG00000061286
Exosc6	ENSMUSG00000109941
Exosc7	ENSMUSG00000025785
Exosc8	ENSMUSG00000027752
Exosc9	ENSMUSG00000027714
Ezr	ENSMUSG00000052397
Fam103a1	ENSMUSG00000038646
Fam120a	ENSMUSG00000038014
Fam46a	ENSMUSG00000032265
Fam46b	ENSMUSG00000046694
Fam46c	ENSMUSG00000044468
Fam46d	ENSMUSG00000073007
Fam50a	ENSMUSG00000001962
Fam98a	ENSMUSG00000002017
Farsb	ENSMUSG00000026245
Fastk	ENSMUSG00000028959
Fastkd1	ENSMUSG00000027086
Fastkd2	ENSMUSG00000025962
Fastkd3	ENSMUSG00000021532
Fastkd5	ENSMUSG00000079043
Fau	ENSMUSG00000038274
Fbl	ENSMUSG00000046865
Fbll1	ENSMUSG00000051062
Fip1l1	ENSMUSG00000029227
Fkbp1a	ENSMUSG00000032966
Fkbp3	ENSMUSG00000020949
Flna	ENSMUSG00000031328
Flnb	ENSMUSG00000025278
Flnc	ENSMUSG00000068699
Fmr1	ENSMUSG00000000838
Fn1	ENSMUSG00000026193
Fndc3b	ENSMUSG00000039286
Frg1	ENSMUSG00000031590
Fto	ENSMUSG00000055932
Ftsj3	ENSMUSG00000020706
Fubp1	ENSMUSG00000028034
Fubp3	ENSMUSG00000026843
Fus	ENSMUSG00000030795
Fxr1	ENSMUSG00000027680
Fxr2	ENSMUSG00000018765
Fyttd1	ENSMUSG00000022800
G3bp1	ENSMUSG00000018583
G3bp2	ENSMUSG00000029405
Gapdh	ENSMUSG00000057666
Gapdh-ps15	ENSMUSG00000096438
Gar1	ENSMUSG00000028010
Gcfc2	ENSMUSG00000035125
Gcn1l1	ENSMUSG00000041638
Gdi2	ENSMUSG00000021218
Gemin5	ENSMUSG00000037275
Gfm1	ENSMUSG00000027774
Gfm2	ENSMUSG00000021666
Gigyf1	ENSMUSG00000029714
Gle1	ENSMUSG00000019715
Gm10256	ENSMUSG00000095852
Gm10352	ENSMUSG00000091987
Gm10767	ENSMUSG00000074826
Gm20765	ENSMUSG00000095022
Gm21293	ENSMUSG00000091779
Gm21304	ENSMUSG00000097550
Gm21312	ENSMUSG00000094144
Gm21677	ENSMUSG00000093918
Gm21693	ENSMUSG00000094511
Gm21704	ENSMUSG00000093987
Gm21708	ENSMUSG00000095948
Gm21992	ENSMUSG00000096370
Gm3376	ENSMUSG00000096520
Gm4064	ENSMUSG00000102053
Gm4301	ENSMUSG00000094314
Gm4302	ENSMUSG00000091101
Gm4303	ENSMUSG00000112931
Gm4305	ENSMUSG00000112856
Gm4307	ENSMUSG00000096744
Gm4312	ENSMUSG00000096640
Gm4340	ENSMUSG00000090854
Gm6763	ENSMUSG00000097427
Gm6793	ENSMUSG00000092086
Gm8764	ENSMUSG00000097878
Gm8994	ENSMUSG00000094973
Gm9833	ENSMUSG00000049230
Gnl2	ENSMUSG00000028869
Gnl3	ENSMUSG00000042354
Gnl3l	ENSMUSG00000025266
Got2	ENSMUSG00000031672
Gpatch1	ENSMUSG00000063808
Gpkow	ENSMUSG00000031148
Grb7	ENSMUSG00000019312
Grsf1	ENSMUSG00000044221
Grwd1	ENSMUSG00000053801
Gspt1	ENSMUSG00000062203
Gspt2	ENSMUSG00000071723
Gtf2f1	ENSMUSG00000002658
Gtf2i	ENSMUSG00000060261
Gtpbp1	ENSMUSG00000042535
Gtpbp2	ENSMUSG00000023952
Gtpbp4	ENSMUSG00000021149
Guf1	ENSMUSG00000029208
H2afx	ENSMUSG00000049932
H2afy2	ENSMUSG00000020086
Habp4	ENSMUSG00000021476
Hadha	ENSMUSG00000025745
Hadhb	ENSMUSG00000059447
Hbs1l	ENSMUSG00000019977
Hdlbp	ENSMUSG00000034088
Heatr1	ENSMUSG00000050244
Helz	ENSMUSG00000020721
Helz2	ENSMUSG00000027580
Hexim1	ENSMUSG00000048878
Hic2	ENSMUSG00000050240
Hist1h1b	ENSMUSG00000058773
Hist1h1d	ENSMUSG00000052565
Hist1h1e	ENSMUSG00000051627
Hist1h2bp	ENSMUSG00000069308
Hist1h4a	ENSMUSG00000060093
Hk2	ENSMUSG00000000628
Hmces	ENSMUSG00000030060
Hmgb3	ENSMUSG00000015217
Hnrnpa0	ENSMUSG00000007836
Hnrnpa1	ENSMUSG00000046434
Hnrnpa1l2-ps2	ENSMUSG00000021927
Hnrnpa2b1	ENSMUSG00000004980
Hnrnpa3	ENSMUSG00000059005
Hnrnpab	ENSMUSG00000020358
Hnrnpc	ENSMUSG00000060373
Hnrnpd	ENSMUSG00000000568
Hnrnpdl	ENSMUSG00000029328
Hnrnpf	ENSMUSG00000042079
Hnrnph1	ENSMUSG00000007850
Hnrnph2	ENSMUSG00000045427
Hnrnph3	ENSMUSG00000020069
Hnrnpk	ENSMUSG00000021546
Hnrnpl	ENSMUSG00000015165
Hnrnpll	ENSMUSG00000024095
Hnrnpm	ENSMUSG00000059208
Hnrnpr	ENSMUSG00000066037
Hnrnpu	ENSMUSG00000039630
Hnrnpul1	ENSMUSG00000040725
Hnrnpul2	ENSMUSG00000071659
Hp1bp3	ENSMUSG00000028759
Hsp90aa1	ENSMUSG00000021270
Hspa8	ENSMUSG00000015656
Hspa9	ENSMUSG00000024359
Hspd1	ENSMUSG00000025980
Hspe1	ENSMUSG00000073676
Hspg2	ENSMUSG00000028763
Htatsf1	ENSMUSG00000067873
Huwe1	ENSMUSG00000025261
Idh2	ENSMUSG00000030541
Idh3a	ENSMUSG00000032279
Ifih1	ENSMUSG00000026896
Ifit2	ENSMUSG00000045932
Igf2bp1	ENSMUSG00000013415
Igf2bp2	ENSMUSG00000033581
Igf2bp3	ENSMUSG00000029814
Igf2r	ENSMUSG00000023830
Ik	ENSMUSG00000024474
Ilf2	ENSMUSG00000001016
Ilf3	ENSMUSG00000032178
Imp3	ENSMUSG00000032288
Ints11	ENSMUSG00000029034
Ints6l	ENSMUSG00000035967
Ipo11	ENSMUSG00000042590
Ipo13	ENSMUSG00000033365
Ipo4	ENSMUSG00000002319
Ipo5	ENSMUSG00000030662
Ipo7	ENSMUSG00000066232
Ipo9	ENSMUSG00000041879
Iqgap1	ENSMUSG00000030536
Ireb2	ENSMUSG00000032293
Isg20l2	ENSMUSG00000048039
Isy1	ENSMUSG00000030056
Jakmip1	ENSMUSG00000063646
Jmjd6	ENSMUSG00000056962
Kars	ENSMUSG00000031948
Keap1	ENSMUSG00000003308
Khdc1a	ENSMUSG00000067750
Khdc1b	ENSMUSG00000085079
Khdc1c	ENSMUSG00000041722
Khdrbs1	ENSMUSG00000028790
Khdrbs2	ENSMUSG00000026058
Khdrbs3	ENSMUSG00000022332
Khnyn	ENSMUSG00000047153
Khsrp	ENSMUSG00000007670
Kin	ENSMUSG00000037262
Knop1	ENSMUSG00000030980
Kpna2	ENSMUSG00000018362
Kpnb1	ENSMUSG00000001440
Kri1	ENSMUSG00000035047
L1td1	ENSMUSG00000087166
Larp1	ENSMUSG00000037331
Larp1b	ENSMUSG00000025762
Larp4	ENSMUSG00000023025
Larp4b	ENSMUSG00000033499
Larp6	ENSMUSG00000034839
Larp7	ENSMUSG00000027968
Las1l	ENSMUSG00000057421
Lbr	ENSMUSG00000004880
Lcp2	ENSMUSG00000002699
Ldha	ENSMUSG00000063229
Lgals3	ENSMUSG00000050335
Lin28a	ENSMUSG00000050966
Lin28b	ENSMUSG00000063804
Llph	ENSMUSG00000020224
Lmna	ENSMUSG00000028063
Lrpprc	ENSMUSG00000024120
Lrrc47	ENSMUSG00000029028
Lrrc59	ENSMUSG00000020869
Lsm12	ENSMUSG00000020922
Lsm14a	ENSMUSG00000066568
Lsm14b	ENSMUSG00000039108
Lsm2	ENSMUSG00000007050
Lsm3	ENSMUSG00000034192
Lsm4	ENSMUSG00000031848;ENSMUSG00000110900
Lsm6	ENSMUSG00000031683
Lsm7	ENSMUSG00000035215
Lsm8	ENSMUSG00000044155
Luc7l	ENSMUSG00000024188
Luc7l2	ENSMUSG00000029823
Luc7l3	ENSMUSG00000020863
Lyar	ENSMUSG00000067367
Macf1	ENSMUSG00000028649
Magoh	ENSMUSG00000028609
Magohb	ENSMUSG00000030188
Mak16	ENSMUSG00000031578
Manf	ENSMUSG00000032575
Map4	ENSMUSG00000032479
Matr3	ENSMUSG00000037236
Mbnl1	ENSMUSG00000027763
Mbnl2	ENSMUSG00000022139
Mbnl3	ENSMUSG00000036109
Mdh2	ENSMUSG00000019179
Mdn1	ENSMUSG00000058006
Mecp2	ENSMUSG00000031393
Mettl14	ENSMUSG00000028114
Mettl16	ENSMUSG00000010554
Mettl3	ENSMUSG00000022160
Mex3a	ENSMUSG00000074480
Mex3b	ENSMUSG00000057706
Mex3c	ENSMUSG00000037253
Mex3d	ENSMUSG00000048696
Mfap1b	ENSMUSG00000048222
Mif	ENSMUSG00000033307
Mif4gd	ENSMUSG00000020743
Mki67	ENSMUSG00000031004
Mkrn1	ENSMUSG00000029922
Mkrn2	ENSMUSG00000000439
Mkrn3	ENSMUSG00000070527
Mocs3	ENSMUSG00000074576
Mov10	ENSMUSG00000002227
Mov10l1	ENSMUSG00000015365
Mphosph10	ENSMUSG00000030521
Mrpl44	ENSMUSG00000026248
Mrps27	ENSMUSG00000041632
Mrto4	ENSMUSG00000028741
Msi1	ENSMUSG00000054256
Msi2	ENSMUSG00000069769
Msn	ENSMUSG00000031207
Mtdh	ENSMUSG00000022255
Mthfsd	ENSMUSG00000031816
Mtif3	ENSMUSG00000016510
Mtpap	ENSMUSG00000024234
Mtrf1	ENSMUSG00000022022
Mtrf1l	ENSMUSG00000019774
Mybbp1a	ENSMUSG00000040463
Myef2	ENSMUSG00000027201
Myh10	ENSMUSG00000020900
Myo18a	ENSMUSG00000000631
Naa38	ENSMUSG00000059278
Naca	ENSMUSG00000061315
Nanos1	ENSMUSG00000072437
Nanos2	ENSMUSG00000051965
Nanos3	ENSMUSG00000056155
Nap1l4	ENSMUSG00000059119
Nasp	ENSMUSG00000028693
Nat10	ENSMUSG00000027185
Ncbp1	ENSMUSG00000028330
Ncbp2	ENSMUSG00000022774
Ncbp3	ENSMUSG00000020783
Ncl	ENSMUSG00000026234
Ndufa4	ENSMUSG00000029632
Ndufa9	ENSMUSG00000000399
Nelfe	ENSMUSG00000024369
Nfx1	ENSMUSG00000028423
Ngdn	ENSMUSG00000022204
Ngrn	ENSMUSG00000047084
Nhp2	ENSMUSG00000001056
Nifk	ENSMUSG00000026377
Nkrf	ENSMUSG00000044149
Nmd3	ENSMUSG00000027787
Nme1	ENSMUSG00000037601
Nmt1	ENSMUSG00000020936
Noa1	ENSMUSG00000036285
Noc2l	ENSMUSG00000095567
Noct	ENSMUSG00000023087
Nol10	ENSMUSG00000061458
Nol11	ENSMUSG00000018433
Nol3	ENSMUSG00000014776
Nol6	ENSMUSG00000028430
Nol7	ENSMUSG00000063200
Nol8	ENSMUSG00000021392
Nolc1	ENSMUSG00000015176
Nomo1	ENSMUSG00000030835
Nono	ENSMUSG00000031311
Nop14	ENSMUSG00000036693
Nop16	ENSMUSG00000025869
Nop2	ENSMUSG00000038279
Nop53	ENSMUSG00000041560
Nop56	ENSMUSG00000027405
Nop58	ENSMUSG00000026020
Nop9	ENSMUSG00000019297
Nova1	ENSMUSG00000021047
Nova2	ENSMUSG00000030411
Npm1	ENSMUSG00000057113
Npm3	ENSMUSG00000056209
Nr0b1	ENSMUSG00000025056
Nsa2	ENSMUSG00000060739
Nsrp1	ENSMUSG00000037958
Nsun2	ENSMUSG00000021595
Nudt21	ENSMUSG00000031754
Nufip2	ENSMUSG00000037857
Nup155	ENSMUSG00000022142
Nup98	ENSMUSG00000063550
Nupl2	ENSMUSG00000048439
Nusap1	ENSMUSG00000027306
Nutf2	ENSMUSG00000008450
Nutf2-ps2	ENSMUSG00000094111
Nvl	ENSMUSG00000026516
Nxf1	ENSMUSG00000010097
Nxf2	ENSMUSG00000009941
Nxf3	ENSMUSG00000057000
Nxf7	ENSMUSG00000031410
Nxt1	ENSMUSG00000036992
Nxt2	ENSMUSG00000042271
Ociad1	ENSMUSG00000029152
Ogdh	ENSMUSG00000020456
Otud4	ENSMUSG00000036990
P4hb	ENSMUSG00000025130
Pa2g4	ENSMUSG00000025364
Pabpc1	ENSMUSG00000022283
Pabpc1l	ENSMUSG00000054582
Pabpc1l2b-ps	ENSMUSG00000084842
Pabpc4	ENSMUSG00000011257
Pabpc4l	ENSMUSG00000090919
Pabpc5	ENSMUSG00000034732
Pabpc6	ENSMUSG00000046173
Pabpn1	ENSMUSG00000022194
Pabpn1l	ENSMUSG00000069867
Pacsin2	ENSMUSG00000016664
Paip1	ENSMUSG00000025451
Paip2	ENSMUSG00000037058
Paip2b	ENSMUSG00000045896
Pak1ip1	ENSMUSG00000038683
Pan2	ENSMUSG00000005682
Pan3	ENSMUSG00000029647
Papd4	ENSMUSG00000042167
Papd5	ENSMUSG00000036779
Papd7	ENSMUSG00000034575
Papola	ENSMUSG00000021111
Papolb	ENSMUSG00000074817
Papolg	ENSMUSG00000020273
Park7	ENSMUSG00000028964
Parn	ENSMUSG00000022685
Parp1	ENSMUSG00000026496
Parp12	ENSMUSG00000038507
Patl1	ENSMUSG00000046139
Patl2	ENSMUSG00000027233
Pcbp1	ENSMUSG00000051695
Pcbp2	ENSMUSG00000056851
Pcbp3	ENSMUSG00000001120
Pcbp4	ENSMUSG00000023495
Pcf11	ENSMUSG00000041328
Pcid2	ENSMUSG00000038542
Pcnp	ENSMUSG00000071533
Pdap1	ENSMUSG00000029623
Pdcd11	ENSMUSG00000025047
Pdcd4	ENSMUSG00000024975
Pde12	ENSMUSG00000043702
Pdia3	ENSMUSG00000027248
Pdia4	ENSMUSG00000025823
Pdia6	ENSMUSG00000020571
Pebp1	ENSMUSG00000032959
Peg10	ENSMUSG00000092035
Pelo	ENSMUSG00000042275
Pes1	ENSMUSG00000020430
Pgk1	ENSMUSG00000062070
Phb	ENSMUSG00000038845
Phf5a	ENSMUSG00000061360
Phrf1	ENSMUSG00000038611
Pkm	ENSMUSG00000032294
Plec	ENSMUSG00000022565
Plekha7	ENSMUSG00000045659
Plrg1	ENSMUSG00000027998
Pnkp	ENSMUSG00000002963
Pnldc1	ENSMUSG00000073460
Pnn	ENSMUSG00000020994
Pno1	ENSMUSG00000020116
Pnpt1	ENSMUSG00000020464
Pnrc2	ENSMUSG00000028675
Poldip3	ENSMUSG00000041815
Polr1e	ENSMUSG00000028318
Polr2a	ENSMUSG00000005198
Polr2b	ENSMUSG00000029250
Polr2d	ENSMUSG00000024258
Polr2e	ENSMUSG00000004667
Polr2f	ENSMUSG00000033020
Polr2g	ENSMUSG00000071662
Polr2h	ENSMUSG00000021018
Polr2i	ENSMUSG00000019738
Polr2j	ENSMUSG00000039771
Polr2k	ENSMUSG00000045996
Polr2l	ENSMUSG00000038489
Polrmt	ENSMUSG00000020329
Ppan	ENSMUSG00000004100
Ppfibp1	ENSMUSG00000016487
Ppid	ENSMUSG00000027804
Ppie	ENSMUSG00000028651
Ppig	ENSMUSG00000042133
Ppih	ENSMUSG00000060288
Ppil1	ENSMUSG00000024007
Ppil3	ENSMUSG00000026035
Ppil4	ENSMUSG00000015757
Ppp1r10	ENSMUSG00000039220
Ppp1r8	ENSMUSG00000028882
Pprc1	ENSMUSG00000055491
Ppwd1	ENSMUSG00000021713
Pqbp1	ENSMUSG00000031157
Prdx6	ENSMUSG00000026701
Prkdc	ENSMUSG00000022672
Prkra	ENSMUSG00000002731
Prpf18	ENSMUSG00000039449
Prpf19	ENSMUSG00000024735
Prpf31	ENSMUSG00000008373
Prpf38a	ENSMUSG00000063800
Prpf38b	ENSMUSG00000027881
Prpf40a	ENSMUSG00000061136
Prpf40b	ENSMUSG00000023007
Prpf8	ENSMUSG00000020850
Prrc2a	ENSMUSG00000024393
Prrc2c	ENSMUSG00000040225
Psap	ENSMUSG00000004207
Psip1	ENSMUSG00000028484
Pspc1	ENSMUSG00000021938
Ptbp1	ENSMUSG00000006498
Ptbp2	ENSMUSG00000028134
Ptbp3	ENSMUSG00000028382
Ptcd1	ENSMUSG00000029624
Ptcd2	ENSMUSG00000021650
Ptcd3	ENSMUSG00000063884
Puf60	ENSMUSG00000002524
Pum1	ENSMUSG00000028580
Pum2	ENSMUSG00000020594
Pum3	ENSMUSG00000041360
Pura	ENSMUSG00000043991
Purb	ENSMUSG00000094483
Purg	ENSMUSG00000049184
Pus7	ENSMUSG00000057541
Pwp2	ENSMUSG00000032834
Pym1	ENSMUSG00000064030
Qk	ENSMUSG00000062078
R3hdm1	ENSMUSG00000056211
R3hdm2	ENSMUSG00000025404
Rack1	ENSMUSG00000020372
Rae1	ENSMUSG00000027509
Raly	ENSMUSG00000027593
Ralyl	ENSMUSG00000039717
Ran	ENSMUSG00000029430
Ranbp17	ENSMUSG00000040594
Ranbp2	ENSMUSG00000003226
Ranbp6	ENSMUSG00000074909
Rars	ENSMUSG00000018848
Raver1	ENSMUSG00000010205
Raver2	ENSMUSG00000035275
Rbbp6	ENSMUSG00000030779
Rbfox1	ENSMUSG00000008658
Rbfox2	ENSMUSG00000033565
Rbfox3	ENSMUSG00000025576
Rbm10	ENSMUSG00000031060
Rbm11	ENSMUSG00000032940
Rbm12	ENSMUSG00000089824
Rbm12b1	ENSMUSG00000046667
Rbm12b2	ENSMUSG00000052137
Rbm14	ENSMUSG00000006456
Rbm15	ENSMUSG00000048109
Rbm15b	ENSMUSG00000074102
Rbm17	ENSMUSG00000037197
Rbm18	ENSMUSG00000026889
Rbm19	ENSMUSG00000029594
Rbm20	ENSMUSG00000043639
Rbm22	ENSMUSG00000024604
Rbm24	ENSMUSG00000038132
Rbm25	ENSMUSG00000010608
Rbm26	ENSMUSG00000022119
Rbm27	ENSMUSG00000024491
Rbm28	ENSMUSG00000029701
Rbm3	ENSMUSG00000031167
Rbm33	ENSMUSG00000048271
Rbm34	ENSMUSG00000033931
Rbm38	ENSMUSG00000027510
Rbm39	ENSMUSG00000027620
Rbm3-ps	ENSMUSG00000099875
Rbm4	ENSMUSG00000094936
Rbm41	ENSMUSG00000031433
Rbm42	ENSMUSG00000036733
Rbm43	ENSMUSG00000036249
Rbm44	ENSMUSG00000070732
Rbm45	ENSMUSG00000042369
Rbm46	ENSMUSG00000033882
Rbm47	ENSMUSG00000070780
Rbm48	ENSMUSG00000040302
Rbm4b	ENSMUSG00000033760
Rbm5	ENSMUSG00000032580
Rbm6	ENSMUSG00000032582
Rbm7	ENSMUSG00000042396
Rbm8a	ENSMUSG00000038374
Rbms1	ENSMUSG00000026970
Rbms2	ENSMUSG00000040043
Rbms3	ENSMUSG00000039607
Rbmx	ENSMUSG00000031134
Rbmx2	ENSMUSG00000031107
Rbmxl1	ENSMUSG00000037070
Rbmxl2	ENSMUSG00000073894
Rbmy	ENSMUSG00000094658
Rbpms	ENSMUSG00000031586
Rbpms2	ENSMUSG00000032387
Rc3h1	ENSMUSG00000040423
Rc3h2	ENSMUSG00000075376
Rcc2	ENSMUSG00000040945
Rdx	ENSMUSG00000032050
Rexo4	ENSMUSG00000052406
Rnf17	ENSMUSG00000000365
Rngtt	ENSMUSG00000028274
Rnmt	ENSMUSG00000009535
Rnpc3	ENSMUSG00000027981
Rnps1	ENSMUSG00000034681
Rpa1	ENSMUSG00000000751
Rpf1	ENSMUSG00000028187
Rpf2	ENSMUSG00000038510
Rpl7a	ENSMUSG00000062647
Rplp2	ENSMUSG00000025508
Rpn1	ENSMUSG00000030062
Rpp30	ENSMUSG00000024800
Rps19bp1	ENSMUSG00000051518
Rps25	ENSMUSG00000009927
Rps27rt	ENSMUSG00000050621
Rpusd3	ENSMUSG00000051169
Rpusd4	ENSMUSG00000032044
Rrbp1	ENSMUSG00000027422
Rrp1	ENSMUSG00000061032
Rrp12	ENSMUSG00000035049
Rrp15	ENSMUSG00000001305
Rrp1b	ENSMUSG00000058392
Rrp36	ENSMUSG00000023971
Rrp7a	ENSMUSG00000018040
Rrp8	ENSMUSG00000030888
Rrp9	ENSMUSG00000041506
Rrs1	ENSMUSG00000061024
Rsl1d1	ENSMUSG00000005846
Rsrc1	ENSMUSG00000034544
Rtcb	ENSMUSG00000001783
Rtf1	ENSMUSG00000027304
Rtn4	ENSMUSG00000020458
Ruvbl1	ENSMUSG00000030079
Ruvbl2	ENSMUSG00000003868
Safb	ENSMUSG00000071054
Safb2	ENSMUSG00000042625
Samd4	ENSMUSG00000021838
Samd4b	ENSMUSG00000109336
Sap18	ENSMUSG00000021963
Sap18b	ENSMUSG00000061104
Sarnp	ENSMUSG00000078427
Sars	ENSMUSG00000068739
Sart1	ENSMUSG00000039148
Sart3	ENSMUSG00000018974
Scaf1	ENSMUSG00000038406
Scaf11	ENSMUSG00000033228
Scaf4	ENSMUSG00000022983
Scaf8	ENSMUSG00000046201
Sdad1	ENSMUSG00000029415
Sdhc	ENSMUSG00000058076
Sec61a1	ENSMUSG00000030082
Sec61b	ENSMUSG00000053317
Sec63	ENSMUSG00000019802
Secisbp2	ENSMUSG00000035139
Secisbp2l	ENSMUSG00000035093
Sept2	ENSMUSG00000026276
Serbp1	ENSMUSG00000036371
Serpinh1	ENSMUSG00000070436
Setx	ENSMUSG00000043535
Sf1	ENSMUSG00000024949
Sf3a1	ENSMUSG00000002129
Sf3a3	ENSMUSG00000028902
Sf3b1	ENSMUSG00000025982
Sf3b2	ENSMUSG00000024853
Sf3b3	ENSMUSG00000033732
Sf3b4	ENSMUSG00000068856
Sf3b5	ENSMUSG00000078348
Sf3b6	ENSMUSG00000037361
Sfpq	ENSMUSG00000028820
Sfswap	ENSMUSG00000029439
Skiv2l	ENSMUSG00000040356
Slbp	ENSMUSG00000004642
Slc25a3	ENSMUSG00000061904
Slc25a5	ENSMUSG00000016319
Slirp	ENSMUSG00000021040
Sltm	ENSMUSG00000032212
Slu7	ENSMUSG00000020409
Smg1	ENSMUSG00000030655
Smg5	ENSMUSG00000001415
Smg6	ENSMUSG00000038290
Smg7	ENSMUSG00000042772
Smg8	ENSMUSG00000020495
Smg9	ENSMUSG00000002210
Smn1	ENSMUSG00000021645
Smndc1	ENSMUSG00000025024
Smu1	ENSMUSG00000028409
Snd1	ENSMUSG00000001424
Snip1	ENSMUSG00000050213
Snrnp70	ENSMUSG00000063511
Snrpa	ENSMUSG00000061479
Snrpa1	ENSMUSG00000030512
Snrpb	ENSMUSG00000027404
Snrpd1	ENSMUSG00000002477
Snrpd3	ENSMUSG00000020180
Snrpe	ENSMUSG00000090553
Snrpf	ENSMUSG00000020018
Snrpn	ENSMUSG00000102252
Snu13	ENSMUSG00000063480
Snw1	ENSMUSG00000021039
Sod1	ENSMUSG00000022982
Son	ENSMUSG00000022961
Spats2	ENSMUSG00000051934
Spats2l	ENSMUSG00000038305
Spcs2	ENSMUSG00000035227
Spen	ENSMUSG00000040761
Spi1	ENSMUSG00000002111
Spout1	ENSMUSG00000039660
Sptan1	ENSMUSG00000057738
Sptbn1	ENSMUSG00000020315
Sqstm1	ENSMUSG00000015837
Srbd1	ENSMUSG00000024135
Srek1	ENSMUSG00000032621
Srfbp1	ENSMUSG00000024528
Srpk1	ENSMUSG00000004865
Srpk2	ENSMUSG00000062604
Srrm1	ENSMUSG00000028809
Srrm2	ENSMUSG00000039218
Srrm3	ENSMUSG00000039860
Srrm4	ENSMUSG00000063919
Srrt	ENSMUSG00000037364
Srsf1	ENSMUSG00000018379
Srsf10	ENSMUSG00000028676
Srsf11	ENSMUSG00000055436
Srsf12	ENSMUSG00000054679
Srsf2	ENSMUSG00000034120
Srsf3	ENSMUSG00000071172
Srsf4	ENSMUSG00000028911
Srsf5	ENSMUSG00000021134
Srsf6	ENSMUSG00000016921
Srsf7	ENSMUSG00000024097
Srsf9	ENSMUSG00000029538
Ssb	ENSMUSG00000068882
Ssbp1	ENSMUSG00000029911
Ssr1	ENSMUSG00000021427
Ssrp1	ENSMUSG00000027067
Ssu72	ENSMUSG00000029038
St13	ENSMUSG00000022403
Stat3	ENSMUSG00000004040
Stau1	ENSMUSG00000039536
Stau2	ENSMUSG00000025920
Strap	ENSMUSG00000030224
Strbp	ENSMUSG00000026915
Sub1	ENSMUSG00000022205
Sugp1	ENSMUSG00000011306
Sugp2	ENSMUSG00000036054
Sumo1	ENSMUSG00000026021
Sumo2	ENSMUSG00000020738
Supt16	ENSMUSG00000035726
Supt4a	ENSMUSG00000020485
Supt5	ENSMUSG00000003435
Supt6	ENSMUSG00000002052
Supv3l1	ENSMUSG00000020079
Surf2	ENSMUSG00000014873
Surf6	ENSMUSG00000036160
Swt1	ENSMUSG00000052748
Syf2	ENSMUSG00000028821
Sympk	ENSMUSG00000023118
Syncrip	ENSMUSG00000032423
Taco1	ENSMUSG00000001983
Taf15	ENSMUSG00000020680
Tagln2	ENSMUSG00000026547
Tarbp1	ENSMUSG00000090290
Tarbp2	ENSMUSG00000023051
Tardbp	ENSMUSG00000041459
Tars	ENSMUSG00000022241
Tbl3	ENSMUSG00000040688
Tbrg4	ENSMUSG00000000384
Tcea1	ENSMUSG00000033813
Tcerg1	ENSMUSG00000024498
Tcf25	ENSMUSG00000001472
Tcof1	ENSMUSG00000024613
Tdrd3	ENSMUSG00000022019
Tdrd7	ENSMUSG00000035517
Tefm	ENSMUSG00000046909
Tex13a	ENSMUSG00000071686
Tex13b	ENSMUSG00000042386
Tfam	ENSMUSG00000003923
Tfip11	ENSMUSG00000029345
Thoc1	ENSMUSG00000024287
Thoc2	ENSMUSG00000037475
Thoc3	ENSMUSG00000025872
Thoc5	ENSMUSG00000034274
Thoc6	ENSMUSG00000041319
Thoc7	ENSMUSG00000053453
Thrap3	ENSMUSG00000043962
Thumpd1	ENSMUSG00000030942
Tia1	ENSMUSG00000071337
Tial1	ENSMUSG00000030846
Tln1	ENSMUSG00000028465
Tma16	ENSMUSG00000025591
Tma7	ENSMUSG00000091537
Tmed9	ENSMUSG00000058569
Tmpo	ENSMUSG00000019961
Tnpo1	ENSMUSG00000009470
Tnpo2	ENSMUSG00000031691
Tnpo3	ENSMUSG00000012535
Tnrc6a	ENSMUSG00000052707
Tnrc6b	ENSMUSG00000047888
Tnrc6c	ENSMUSG00000025571
Top3b	ENSMUSG00000022779
Tpi1	ENSMUSG00000023456
Tppp3	ENSMUSG00000014846
Tpr	ENSMUSG00000006005
Tra2a	ENSMUSG00000029817
Tra2b	ENSMUSG00000022858
Trim25	ENSMUSG00000000275
Trim56	ENSMUSG00000043279
Trim71	ENSMUSG00000079259
Trip12	ENSMUSG00000026219
Trmt2a	ENSMUSG00000022721;ENSMUSG00000098930
Trnau1ap	ENSMUSG00000028898
Trub1	ENSMUSG00000025086
Trub2	ENSMUSG00000039826
Tsfm	ENSMUSG00000040521
Ttf2	ENSMUSG00000033222
Tubb4b	ENSMUSG00000036752
Tubb5	ENSMUSG00000001525
Tufm	ENSMUSG00000073838
Tut1	ENSMUSG00000071645
Twf2	ENSMUSG00000023277
Twistnb	ENSMUSG00000020561
Txn1	ENSMUSG00000028367
U2af1	ENSMUSG00000061613
U2af1l4	ENSMUSG00000078765
U2af2	ENSMUSG00000030435
U2surp	ENSMUSG00000032407
Uba1	ENSMUSG00000001924
Ubap2	ENSMUSG00000028433
Ubap2l	ENSMUSG00000042520
Ubc	ENSMUSG00000008348
Ube2l3	ENSMUSG00000038965
Ubtf	ENSMUSG00000020923
Ufl1	ENSMUSG00000040359
Uhmk1	ENSMUSG00000026667
Unk	ENSMUSG00000020770
Upf1	ENSMUSG00000058301
Upf2	ENSMUSG00000043241
Upf3a	ENSMUSG00000038398
Upf3b	ENSMUSG00000036572
Urb1	ENSMUSG00000039929
Urb2	ENSMUSG00000031976
Usp10	ENSMUSG00000031826
Usp36	ENSMUSG00000033909
Utp14a	ENSMUSG00000063785
Utp14b	ENSMUSG00000079470
Utp15	ENSMUSG00000041747
Utp18	ENSMUSG00000054079
Utp20	ENSMUSG00000004356
Utp3	ENSMUSG00000070697
Utp6	ENSMUSG00000035575
Vapa	ENSMUSG00000024091
Vars	ENSMUSG00000007029
Vcp	ENSMUSG00000028452
Vim	ENSMUSG00000026728
Vps4b	ENSMUSG00000009907
Wbp11	ENSMUSG00000030216
Wbp4	ENSMUSG00000022023
Wdr3	ENSMUSG00000033285
Wdr33	ENSMUSG00000024400
Wdr36	ENSMUSG00000038299
Wdr43	ENSMUSG00000041057
Wdr46	ENSMUSG00000024312
Wdr61	ENSMUSG00000061559
Wdr75	ENSMUSG00000025995
Wdr83	ENSMUSG00000005150
Wtap	ENSMUSG00000060475
Xab2	ENSMUSG00000019470
Xpo1	ENSMUSG00000020290
Xpo4	ENSMUSG00000021952
Xpo5	ENSMUSG00000067150
Xpo6	ENSMUSG00000000131
Xpo7	ENSMUSG00000022100
Xrcc6	ENSMUSG00000022471
Xrn1	ENSMUSG00000032410
Xrn2	ENSMUSG00000027433
Yars	ENSMUSG00000028811
Yars2	ENSMUSG00000022792
Ybx1	ENSMUSG00000028639
Ybx2	ENSMUSG00000018554
Ybx3	ENSMUSG00000030189
Ylpm1	ENSMUSG00000021244
Ythdc1	ENSMUSG00000035851
Ythdc2	ENSMUSG00000034653
Ythdf1	ENSMUSG00000038848
Ythdf2	ENSMUSG00000040025
Ythdf3	ENSMUSG00000047213
Ywhae	ENSMUSG00000020849
Ywhag	ENSMUSG00000051391
Ywhah	ENSMUSG00000018965
Ywhaz	ENSMUSG00000022285
Zc3h10	ENSMUSG00000039810
Zc3h11a	ENSMUSG00000102976
Zc3h12a	ENSMUSG00000042677
Zc3h12b	ENSMUSG00000035045
Zc3h12c	ENSMUSG00000035164
Zc3h12d	ENSMUSG00000039981
Zc3h13	ENSMUSG00000022000
Zc3h14	ENSMUSG00000021012
Zc3h15	ENSMUSG00000027091
Zc3h18	ENSMUSG00000017478
Zc3h3	ENSMUSG00000075600
Zc3h4	ENSMUSG00000059273
Zc3h7a	ENSMUSG00000037965
Zc3h7b	ENSMUSG00000022390
Zc3h8	ENSMUSG00000027387
Zc3hav1	ENSMUSG00000029826
Zcchc11	ENSMUSG00000034610
Zcchc13	ENSMUSG00000031330
Zcchc3	ENSMUSG00000074682
Zcchc6	ENSMUSG00000035248
Zcchc8	ENSMUSG00000029427
Zcchc9	ENSMUSG00000021621
Zcrb1	ENSMUSG00000022635
Zfp207	ENSMUSG00000017421
Zfp326	ENSMUSG00000029290
Zfp36	ENSMUSG00000044786
Zfp36l1	ENSMUSG00000021127
Zfp36l2	ENSMUSG00000045817
Zfp36l3	ENSMUSG00000059334
Zfp385a	ENSMUSG00000000552
Zfp385b	ENSMUSG00000027016
Zfp593	ENSMUSG00000028840
Zfp598	ENSMUSG00000041130
Zfp638	ENSMUSG00000030016
Zfp706	ENSMUSG00000062397
Zmat3	ENSMUSG00000027663
Zranb2	ENSMUSG00000028180
Zrsr1	ENSMUSG00000044068
Zrsr2	ENSMUSG00000031370

## Sheet: 1B - library sgRNAs
Gene name	Seed sequence	Reads	Proportion %
1110004F10Rik	AACTGTCAGGACGGTACCGG	876	0.0103141
1110004F10Rik	GCAAACTGTCAGGACGGTAC	783	0.00921912
1110004F10Rik	TGGACAGCAAACTGTCAGGA	401	0.00472141
1110004F10Rik	TTCTTACAGAAAGAACACAC	590	0.00694672
1110004F10Rik	GTTATTTACATCGTCGTCGG	746	0.00878347
1110004F10Rik	GTAGAAGATCATGATGGAGA	345	0.00406206
1110004F10Rik	TCAACATCTCACTTCCGAAC	975	0.0114797
1110004F10Rik	GTCTCAGTACCAGCAGAGCA	448	0.00527479
1110004F10Rik	AATTGGGAGGCAGCAGACTT	482	0.00567511
1110004F10Rik	CCCGGGAGTCTCACCCGCAC	878	0.0103377
1810009A15Rik	CACAGTTCAGTCACCGTCCG	0	0
1810009A15Rik	AAAGATCAATCGTCCCCGGA	555	0.00653462
1810009A15Rik	GATCCCTGCTTAATACCCTG	655	0.00771203
1810009A15Rik	GAGGAAAGATCAATCGTCCC	782	0.00920734
1810009A15Rik	TCGGCGACGGAAACGCCAGG	809	0.00952524
1810009A15Rik	CCACAGTTCAGTCACCGTCC	951	0.0111972
1810009A15Rik	TCGGGGCTGTGATAGACGAA	309	0.00363819
1810009A15Rik	CGTACGCCCGCTTCTTGAGG	540	0.00635801
1810009A15Rik	CTTCCCAGACAGCGTGATGT	732	0.00861864
1810009A15Rik	CGCTGTCTGGGAAGAAGCGC	546	0.00642865
2210010C04Rik	GGACACTCGAGAGTTGAGGG	485	0.00571044
2210010C04Rik	TTACGATTTGTAGCAGTGAG	605	0.00712333
2210010C04Rik	GCTCACTCATCAATTCCCAG	755	0.00888944
2210010C04Rik	ACACAACATTGATGCCCTTG	773	0.00910137
2210010C04Rik	TTGGAGGCTACACCTGCCAG	964	0.0113502
2210010C04Rik	CAGGAGCATCAAGACACTGA	859	0.0101139
2210010C04Rik	TGTTTGCATTATAGTTGGGG	327	0.00385013
2210010C04Rik	AGACACCTAGTACCAGCTGA	705	0.00830074
2210010C04Rik	TTGTCATCATCATCATCCAG	1097	0.0129162
2210010C04Rik	TGAGTGAGCCTCCACAAAAA	325	0.00382658
2210016L21Rik	ATTGGCACGCTGTCGCGAGG	980	0.0115386
2210016L21Rik	CTGTGCGTGTTGTAGGCATG	772	0.0090896
2210016L21Rik	GCAGCGGAGAGACCCGAAGC	581	0.00684075
2210016L21Rik	CTTCTTCCAAACTTCTGCGA	541	0.00636978
2210016L21Rik	GGAACTCAGGAGTGGTCCGA	411	0.00483915
2210016L21Rik	GGAATTGGCACGCTGTCGCG	844	0.00993733
2210016L21Rik	TTCTTCACATCCATCCCCGG	1040	0.0122451
2210016L21Rik	ACAGCGATGAGGAACTGCAG	812	0.00956056
2210016L21Rik	AAAGGCAAAGATGCAGCAGG	515	0.00606366
2210016L21Rik	AGCTGGGGGGCTGGCGCTTC	384	0.00452125
2410004B18Rik	TCAGTAGTGTAGGTCTCTGG	401	0.00472141
2410004B18Rik	GCTGTTCTCATCCGACGAGT	787	0.00926621
2410004B18Rik	GGACCCGTTGAGCTACTTCG	700	0.00824187
2410004B18Rik	GGAAGACGCGGGTCGCAAGG	607	0.00714687
2410004B18Rik	GCTTACTCGACAGCCTCCAA	854	0.0100551
2410004B18Rik	GCTCAACAAGCAGATCGACT	755	0.00888944
2410004B18Rik	GTTCCGCAGCGTGACCCGCC	1217	0.0143291
2410004B18Rik	GCTTCTCCGCCTGCTTCCCG	980	0.0115386
2410004B18Rik	GCCATGTCCAGCTCTGGCGG	722	0.0085009
2410004B18Rik	CGGAACAGCTCGTCCGGGCC	661	0.00778268
2810006K23Rik	CGTGAAAGGACATGGCCCAG	609	0.00717042
2810006K23Rik	TCCTGATCAGTGGTAGAGGG	506	0.00595769
2810006K23Rik	GTGCCACCAAACAAGATCTG	763	0.00898363
2810006K23Rik	ACCTTGACCACAATGCCGGA	612	0.00720575
2810006K23Rik	CGAGCTCACTCTCATTCAGG	643	0.00757074
2810006K23Rik	TTTGAGCACTACACAATTGC	959	0.0112914
2810006K23Rik	AGGATATGCTCTGGGAAGTG	464	0.00546318
2810006K23Rik	GATAGCTCGGAAAGTCCTCC	635	0.00747655
2810006K23Rik	AATGGCTGCCAGCACAGTAC	890	0.0104789
2810006K23Rik	ATTCCTGGGAAGAGCAGTGC	637	0.0075001
A1cf	AGTTATGTTAGGTACACCCG	4	4.70964e-05
A1cf	CAGTTATGTTAGGTACACCC	813	0.00957234
A1cf	ACACACAGGAAAATGGACAA	537	0.00632269
A1cf	CAATCGGCAATTGTCCACAC	806	0.00948992
A1cf	GAATTCAACAGTATTAAACC	505	0.00594592
A1cf	GCTGATAAAACCAAAAACCG	311	0.00366174
A1cf	ATTTACATGAATGTCCCTGT	501	0.00589882
A1cf	GTATGAGTTCATCCTCAAAG	455	0.00535721
A1cf	TCTGCCCAGTCTACTGCAAT	643	0.00757074
A1cf	GCTTGGGGGGTATAGAAGAC	274	0.0032261
Aatf	GGATCCTGAGGCCGACCCGG	672	0.00791219
Aatf	GGGCGAAACCCAATACAGAG	428	0.00503931
Aatf	AGATAACGAAGCATCTGATG	551	0.00648753
Aatf	ACAGGGAAAACATCTGGTTG	435	0.00512173
Aatf	ATCCACCAATGACCTTAACA	686	0.00807703
Aatf	TGACGAAGACTTAGAAGGTG	604	0.00711155
Aatf	AAGCGCTTTGCCATGAAGCT	490	0.00576931
Aatf	AGAAACTTTGACACTGGAGA	428	0.00503931
Aatf	AGTGAGTAGCATTAGAAAGT	286	0.00336739
Aatf	GTTCTCAGAAGATGTTGAGG	428	0.00503931
Abcf1	GCAGCACGTCAATGTTAGGG	735	0.00865396
Abcf1	GATGGATTATGAACGACAGG	352	0.00414448
Abcf1	TGAGGAACTGCGAGCTACCG	661	0.00778268
Abcf1	TTGGCCTTCTTCCGTCCTCG	1149	0.0135284
Abcf1	GAAGGACAGAGACAAAAAGG	498	0.0058635
Abcf1	GACGAATAGCTCCTTGCCGT	710	0.00835961
Abcf1	GCACTTATTGAGCCAGATGA	429	0.00505109
Abcf1	CCCAGGAGGTTCCTCAGCCA	675	0.00794751
Abcf1	GGAAGAGGAAAAATTGCAGA	258	0.00303772
Abcf1	TACATCTTCTTGAAGGTCAC	586	0.00689962
Abcf2	GGTGGGATCTTACCGCACGG	729	0.00858331
Abcf2	CACAAGCATCGAGGTCCAGG	1021	0.0120213
Abcf2	TGGCTTAAATGGAATTGGTG	275	0.00323788
Abcf2	CCAGCCACACACAAGCATCG	1105	0.0130104
Abcf2	GGACCAGATCGCACACATGA	739	0.00870105
Abcf2	TGTGGACATCAGTACTGTTG	709	0.00834783
Abcf2	GGTGGCAGAAGAGAAAATCG	522	0.00614608
Abcf2	CAAGAAACTCAAGTATTACA	359	0.0042269
Abcf2	GCGGTTAGCACATGAGGATG	819	0.00964298
Abcf2	AGCTTCTTGCGCTGCATAGC	489	0.00575753
Abt1	AGTCTACATAACACGCCCAT	673	0.00792396
Abt1	CAAAGGCAAGGTGTTCACTG	690	0.00812412
Abt1	CAAGGACTATACCGAAGGCT	604	0.00711155
Abt1	CGCAACCTGCTCAGCGCCTA	911	0.0107262
Abt1	AAGGCAACGCCTGAGAGCAG	857	0.0100904
Abt1	TGGCCCAGGTACACAATCCC	670	0.00788864
Abt1	GCAGCAAAAGGCTGCGATGG	457	0.00538076
Abt1	CTTTGTGAAACGCAAGAAGA	385	0.00453303
Abt1	GGAGGATCAGGAGGAGCCCG	480	0.00565156
Abt1	ACCTCACCTTGAGGTTCCAC	1008	0.0118683
Acadm	AAGATGTGGATAACCAACGG	647	0.00761784
Acadm	CCCGGAATATGACAAAAGCG	1	1.17741e-05
Acadm	TCGAACACAACACTCGAAAG	689	0.00811235
Acadm	AGCAGGTTTCAAGATCGCAA	467	0.0054985
Acadm	GGAATATGACAAAAGCGGGG	371	0.00436819
Acadm	GCGCACATTCCGGAAAGTTG	589	0.00693494
Acadm	AACATACTCACACACATCAT	843	0.00992556
Acadm	CCAGTAAAGGCTTTACTAGC	379	0.00446238
Acadm	TTCTCTCTAGGAACTAAACA	461	0.00542786
Acadm	GTTGGCGTATGGGTGTACAG	554	0.00652285
Acin1	TAGGAGGAGACAACTGAATG	722	0.0085009
Acin1	CCTGGCCGAAAACGCCGTTG	633	0.007453
Acin1	GGACGAGATGACCCATCCTG	1000	0.0117741
Acin1	CCCTCACGAGAGACCCAAGA	618	0.00727639
Acin1	TCGAAATTTAAAAATAGAGG	184	0.00216643
Acin1	CGGACAGATGCTGAGAACGT	609	0.00717042
Acin1	ACTCCTCCACTGTTAGAGGG	693	0.00815945
Acin1	AAGGGTGAGTTAGAGAAAGG	358	0.00421513
Acin1	CCTGGTCAAGCGGCTCAAAG	653	0.00768848
Acin1	TGAAAACAGACCTGAAAATG	524	0.00616962
Aco1	TAGCCCACCACATCAAACCT	757	0.00891299
Aco1	ATCGCATATGCTATTACCAG	586	0.00689962
Aco1	CCACCGCCATTTAGGCCGCG	821	0.00966653
Aco1	CATATGCTATTACCAGAGGG	322	0.00379126
Aco1	AGCTTGTAGCCAATCACCTG	416	0.00489802
Aco1	CTCACCTGCTCCTAACATCA	940	0.0110676
Aco1	GGATGGAATGATCAATTACA	433	0.00509818
Aco1	AAGACCTCAGGACAAAGTCG	787	0.00926621
Aco1	AACATGCGGATAATCCCTCC	836	0.00984314
Aco1	AAACTCATCACAGTTCCGAA	781	0.00919557
Adad1	CTTTCAGAGGAATATCCAGT	500	0.00588705
Adad1	TATATGAACCAGTTGCCGAA	537	0.00632269
Adad1	TTTATAATGAAATACAAACG	404	0.00475673
Adad1	TCCAAGGTTACGCAAGTGAC	777	0.00914847
Adad1	TTACAACTGTGACTTAATCT	382	0.0044977
Adad1	TATTCAGTACAAGACAGGAC	817	0.00961943
Adad1	GGCGCGAAGGACAGCGTCGG	824	0.00970185
Adad1	GTGCATCAAGCCAAATGGAA	489	0.00575753
Adad1	GCTGTGAAATCTTGGCATAC	594	0.00699381
Adad1	TAGCAAAAATCCTGCTATGA	479	0.00563979
Adad2	CCAGGCTTGAGTGCGAAGGG	527	0.00620495
Adad2	GCCCACGTGGGTATCTCGGA	518	0.00609898
Adad2	CCCATGCTCAGCGGTCCTAG	738	0.00868928
Adad2	TGCGGGCGATGACCAGACCA	721	0.00848912
Adad2	GGTACGGTGAGCTCTCACTC	778	0.00916024
Adad2	ATGGGTTGGTCTGTCCTGCG	523	0.00615785
Adad2	GCCTGCGGGCGACTTCCCCG	632	0.00744123
Adad2	ACCCAGTGCATGGCTAACCT	677	0.00797106
Adad2	GGCTGGCGGGGAGTCACCAG	507	0.00596947
Adad2	GTGCAGGACGCTGTCTTCTG	911	0.0107262
Adar	AGAGGTAACCCCAGTAACAG	484	0.00569866
Adar	ACAATGGCCCCTCTAGAGCA	671	0.00790042
Adar	ACTCCAACAAGCCGCCTACG	830	0.0097725
Adar	GACACTGGCCAAGATTCCCA	619	0.00728816
Adar	TGTATCCAGGAATTCCCTAG	553	0.00651107
Adar	CTTGTCCGTCAAGTACCAGA	731	0.00860686
Adar	ACTCTAACAACCCGCTGACA	726	0.00854799
Adar	AGAGAACAAGGATGTTGCTG	606	0.0071351
Adar	GAGCTCTCTGGCTAGCACAT	508	0.00598124
Adar	TGTGAGCGCCCCCAGCAAGA	458	0.00539253
Adarb1	CTTCTACGTAGGCTCCAACG	730	0.00859509
Adarb1	TCTTGAATGAGCTACGCCCA	688	0.00810058
Adarb1	TTCGGGAGATTATCTCTGCG	362	0.00426222
Adarb1	GGGTATTCCGCTCTCCAACG	668	0.00786509
Adarb1	GGTGAATACATGAGTGACCG	440	0.0051806
Adarb1	TACATCAGCACCTCGCCCTG	1232	0.0145057
Adarb1	TCAGGTCACTGAACTTACCC	666	0.00784155
Adarb1	ACAAACAGAGGTGCATGCAC	975	0.0114797
Adarb1	AAGAAACAAGAAGCTTGCCA	578	0.00680543
Adarb1	AGGCCCACCTAGCCATGGGA	688	0.00810058
Adarb2	TACAGCCACTGCGAAAACTG	849	0.00999621
Adarb2	ATGACAAAGCTCTTGACTCG	613	0.00721752
Adarb2	CCTCTGCCTATCGGCGAGGA	754	0.00887767
Adarb2	GTATGCCCGCCACAAAACAC	1006	0.0118447
Adarb2	GTCATGCTGAGATCGTGGCG	729	0.00858331
Adarb2	ACTCATTCAGTACCACTACA	660	0.0077709
Adarb2	ACCGAAATGTGAGCAACCTG	645	0.00759429
Adarb2	CAGAGGTGAAGTCAGTGCAC	823	0.00969008
Adarb2	AGGCAGCCGGATATCGAAGA	386	0.0045448
Adarb2	TCTGCAAACTCCAGCTGATC	561	0.00660527
Aen	CCGGCCTGAAATGCCCATTG	732	0.00861864
Aen	AGCTGTTGAGCACGGCACCA	773	0.00910137
Aen	ACAGATGCCAGCGGTCACAG	849	0.00999621
Aen	GCGGGTGCGATAGTCCACAA	522	0.00614608
Aen	CAGATCCTTAAGCTGTTGAA	478	0.00562802
Aen	CAAGGCTATCCCCTTTCAGG	519	0.00611075
Aen	CCAGAGAAGCTCCAAGACCT	685	0.00806525
Aen	CCCTGAAGTACGTCCACCCT	891	0.0104907
Aen	GCTCGCTCACCCGTCCTTGG	1012	0.0119154
Aen	TGAATACCAAGGATGTGGTT	395	0.00465077
Afdn	GTTTCAGTTTCAGATCGTCG	605	0.00712333
Afdn	CACAAACTTAAACACATGCG	594	0.00699381
Afdn	CCACCGTTCCAGCCCCAATG	853	0.0100433
Afdn	GCTGGCTGGACAATACATAC	567	0.00667591
Afdn	AAGGCTCATCGGGTGCACAG	911	0.0107262
Afdn	AAGTTGTCATGAAACGGCGG	786	0.00925444
Afdn	TTGGAACAAAGATGATCGAG	562	0.00661704
Afdn	GTTCTGCGTTCTCACGCATA	847	0.00997266
Afdn	AGGGAATGGCCAAGTGACAA	486	0.00572221
Afdn	CAGGAGCCATGTCCTTGCTG	697	0.00820654
Aff1	ACTGCCACCAAACCGTCATG	998	0.0117505
Aff1	AAGGCGATGAGCTATCAAGT	448	0.00527479
Aff1	TCTAGGAAATGACCCACTCG	611	0.00719397
Aff1	ATCCCTTAGGTCATGACAGG	831	0.00978427
Aff1	TAACCCTAGACCTCCTCACG	1368	0.016107
Aff1	CCGTGGGCAGCAAACAACCC	686	0.00807703
Aff1	GCTCCCGGATCACGTCCTGT	1068	0.0125747
Aff1	GGAGCACAGAGTCTCCACAA	536	0.00631091
Aff1	CCCACTACTGGAATGTGCTG	527	0.00620495
Aff1	AGGCGGCTTCGGTCTGGGCA	542	0.00638156
Aff2	TTAGGGAAAAAGCTCGACCA	392	0.00461544
Aff2	TGTGTTGCAGGCGTAGACTG	579	0.0068172
Aff2	CTGCAACACAAACCAATGTG	658	0.00774735
Aff2	CTAGTGTTATGACTATCTCG	582	0.00685252
Aff2	AATAAAGATGAGGCAACTAG	546	0.00642865
Aff2	GCTGTGTTGAAGAAATCTTG	413	0.0048627
Aff2	GTTCTGGACTCGGTTGGCAA	547	0.00644043
Aff2	TTGGATTTAGAAGTAATGCA	417	0.0049098
Aff2	GTACTCTAGAAAGTAAGTCG	429	0.00505109
Aff2	GCTTTGTTTCGGCTTCGTGG	730	0.00859509
Aff3	AGAAACCAACTGCCTACGTG	827	0.00973718
Aff3	TCTTCCAACTCAGCGCAACA	1048	0.0123392
Aff3	GAATCAATACTACACGCCGC	951	0.0111972
Aff3	TGGCGCCGAACCTCTACAGT	725	0.00853622
Aff3	TGAACTACTATCTCCGCTAA	532	0.00626382
Aff3	TATTCAAGCTCCTGCCAAAG	672	0.00791219
Aff3	CCTGTCCTGTTGTTACCGCA	837	0.00985492
Aff3	TCCAACCAGAGTCATCTTGT	616	0.00725284
Aff3	TGCTCGCTCCCAGTGGTGGT	555	0.00653462
Aff3	CGCAGCTGCCCTCCCGCCCG	1021	0.0120213
Aff4	AGAGCGACAGTACCACTCAG	1010	0.0118918
Aff4	TCCAGAGAAACACTCGAGAG	417	0.0049098
Aff4	GGTGTATGAATAGCCGTTAG	340	0.00400319
Aff4	GTATTCGAGTCAGAAGATTG	386	0.0045448
Aff4	TCTATCTTCAGGCCTCCACG	1020	0.0120096
Aff4	GCCCACTTGAAAAAGGTCCG	520	0.00612253
Aff4	TCCTGTCAAACCCTCCTCAG	692	0.00814767
Aff4	ATTGTGATAAGACAATGCCA	683	0.00804171
Aff4	AGTAGCAAATGGACTCCTGT	398	0.00468609
Aff4	AACCACCACCAACAAACAAG	983	0.0115739
Agfg1	TGTTTCGACTGCGACCAGCG	683	0.00804171
Agfg1	TGAAATAGACGCATGAACCG	465	0.00547495
Agfg1	ACAGACAGCAGACAAATATG	690	0.00812412
Agfg1	GAGATAGATTTCACCCTGTG	496	0.00583995
Agfg1	CAGTTGTAGGTCGCTCTCAA	651	0.00766493
Agfg1	GGTTCCAAAATCAGCACTGG	489	0.00575753
Agfg1	GTCTGCAAACAGATATGGCT	643	0.00757074
Agfg1	GCACACTTTAACAGTCATGC	560	0.00659349
Agfg1	ACCACGGGTAAAGCTCCTGT	577	0.00679365
Agfg1	AAGAAGAGTGACTTGCTGTG	698	0.00821832
Ago1	CTTTGAGGTGACAATCCCCG	690	0.00812412
Ago1	GCATACCTATTTGCCCCTCG	768	0.0090425
Ago1	ACACGCTGGGAATCCGTGAG	553	0.00651107
Ago1	TGACGTTTACCATTACGAGG	612	0.00720575
Ago1	GAACACGCTGGGAATCCGTG	961	0.0113149
Ago1	CCTTGGTAAACCGAACACGC	801	0.00943105
Ago1	GGCTACTACCACCCGCTGGG	539	0.00634624
Ago1	GCCATTGCTACGCCCAACCA	1108	0.0130457
Ago1	AAGATCAATGTCAAACTCGG	480	0.00565156
Ago1	GCTTCTGCAAATACGCACAG	663	0.00780622
Ago2	AAGGTGGAGATAACGCACTG	596	0.00701736
Ago2	CCTGTCCGACTTGTAAACAC	717	0.00844202
Ago2	CGAAACAAGCAGTTCCACAC	764	0.00899541
Ago2	CCGCCCTCCATCCTCTACGG	903	0.010632
Ago2	GATACCTGTTCACTCTCCGA	795	0.0093604
Ago2	GGCCAACACCTACCATACAC	1019	0.0119978
Ago2	GTCCGACTTGTAAACACGGG	689	0.00811235
Ago2	TACACGATGCACTTTCGGGG	577	0.00679365
Ago2	TTTCCAAAGAGAAGGTCGGA	434	0.00510996
Ago2	GTCAGCACCTGATCGCCAAG	1338	0.0157537
Ahcyl1	CCCACCAAACATCACATCCG	887	0.0104436
Ahcyl1	GATACTTCTTATAAACCCAG	306	0.00360287
Ahcyl1	AGTGGGCTGTACGCACATCA	909	0.0107027
Ahcyl1	TAAGAAGATCCGAGGCATTG	725	0.00853622
Ahcyl1	CAGACAGCTACAGTTCAGGT	724	0.00852444
Ahcyl1	TATGTAGACAATTGCTCCAA	561	0.00660527
Ahcyl1	AGTCAGAAGATGATTTCTGG	534	0.00628737
Ahcyl1	GAATCATTGACATTCATGGC	588	0.00692317
Ahcyl1	GAGATTGAGATTGCAGAGCA	389	0.00458012
Ahcyl1	CTTCATGGCCACGGTCACCA	1013	0.0119272
Ahnak	TGACATCAAAGGTCCCAAAG	484	0.00569866
Ahnak	AAGGAGATATTAGTATTTCG	302	0.00355578
Ahnak	CTTCAAGTTTAGCTCCACAT	556	0.0065464
Ahnak	GCTCCAGATATGGACGTGCA	573	0.00674656
Ahnak	AAGCCCCTCAATATTGACAG	572	0.00673478
Ahnak	AGAATTAAAAGGCCCAAGTG	357	0.00420335
Ahnak	GGATATGTCTCTGCCCAAAG	496	0.00583995
Ahnak	GGATGTGTCTCTGCCCAAAG	618	0.00727639
Ahnak	GGACATCAAAGGCCCCAAAG	584	0.00687607
Ahnak	GATGTGGATCTGGATCTCAA	453	0.00533366
AI837181	GGCCCGAAGTTGGGTTGGCG	534	0.00628737
AI837181	CAACAGGATGGAACCAAATG	544	0.00640511
AI837181	CGGAACGGAGTGAAGGCCGG	546	0.00642865
AI837181	CCATAGCGAGTAACTTGAGA	281	0.00330852
AI837181	ACGGGCATCAAATACCAGCC	624	0.00734703
AI837181	AGACTCTCCAGGTGGCCGGG	484	0.00569866
AI837181	CAACCAGGCATCCAGCTCTG	685	0.00806525
AI837181	CGGCGCAGCAGATCCCGGGC	358	0.00421513
AI837181	CTGCCATGGCCTCTGCAGCC	859	0.0101139
AI837181	CGGCGGCCGTGGCAGGGGCG	513	0.00604011
Aicda	GTAGGAACAACAATTCCACG	546	0.00642865
Aicda	TTCACAGAAGTAGAGGCGCG	659	0.00775913
Aicda	ACCAGGTGACGCGGTAACAC	1125	0.0132459
Aicda	AAAAATGTCCGCTGGGCCAA	560	0.00659349
Aicda	GCCGGGCACAGTCATAGCAC	774	0.00911315
Aicda	ACGTGGCTGAGTTTCTGAGA	445	0.00523947
Aicda	ACCTCTGCTACGTGGTGAAG	932	0.0109735
Aicda	ACCTCCTGCTCACTGGACTT	833	0.00980782
Aicda	ACCGCAAGGCTGAGCCTGAG	583	0.0068643
Aicda	TGACGCGGTAACACCGGCCC	1010	0.0118918
Akap1	GAGGGGGCAAGTAACCCGAG	429	0.00505109
Akap1	ACTGGCTCCACAAAGCTACT	561	0.00660527
Akap1	TGTAAGCAGGAGTCCGCACT	768	0.0090425
Akap1	GCCCTGCCATCAAGGACCGA	841	0.00990201
Akap1	AGTTGCTTCCAAGATCACCT	704	0.00828896
Akap1	GATACAGAAGCAGATCACTC	708	0.00833606
Akap1	TCCCCAGCGTTGCAGACACG	991	0.0116681
Akap1	GCCAGCCAGGAAACTAGCTT	608	0.00715865
Akap1	ACAGAGACCATCTCAAGCTC	674	0.00793574
Akap1	CCACTTCTGAGACACACTCC	796	0.00937218
Akap17b	AGACAAGCTGTGATCAACCG	732	0.00861864
Akap17b	TGATTTCAATGCAGTCCCTG	592	0.00697026
Akap17b	AGAGAGATGTCTACGCTAAG	490	0.00576931
Akap17b	AACTCTCAAAGACTACTCGG	880	0.0103612
Akap17b	ACCACCAAACATTTCAGTGA	690	0.00812412
Akap17b	GTAGTAGCGACAGATGCCCA	837	0.00985492
Akap17b	ACTCTTGGAGAGGCGCACTG	940	0.0110676
Akap17b	TGAAGCTCTTCGGTTACTCC	428	0.00503931
Akap17b	CAGAAATCTTCACACACTCC	935	0.0110088
Akap17b	GAAAGAAGGCCAGGGACAGG	603	0.00709978
Akap8	CATAATCATAACCGTAGCCG	703	0.00827719
Akap8	GTTCAGCTCATTCCACGTAG	823	0.00969008
Akap8	AATCATAACCGTAGCCGGGG	433	0.00509818
Akap8	GATGTGGCCGGTCCCAGACG	709	0.00834783
Akap8	GGCCCCTCAAGAAACCATCA	565	0.00665236
Akap8	GACATGTTGTCTAAGGAAGG	393	0.00462722
Akap8	AGGAGATGAAGAATTCAGGG	291	0.00342626
Akap8	TTACGGCCCAGCCTCATGGG	785	0.00924266
Akap8	CAGTAGCATACTTTACCTGG	809	0.00952524
Akap8	ACGAAACTTGCATACAGAAC	939	0.0110559
Akap8l	CACGCATTCGAAACTGGTCA	607	0.00714687
Akap8l	GACCAGTTTCGAATGCGTGG	825	0.00971363
Akap8l	GAGACAGACATGATACAAGG	642	0.00755897
Akap8l	CAGCTTATTCACCCGGAAGT	405	0.00476851
Akap8l	GCGGCAGCGAGACCGTATGG	916	0.0107851
Akap8l	AGGATAACACCACCAACTAT	828	0.00974895
Akap8l	GCATGTGGGAAGATCCCATG	741	0.0087246
Akap8l	TTGCAGATGAAGGCACTGAG	712	0.00838315
Akap8l	TGTTCCAGGGCATGCGTGGT	513	0.00604011
Akap8l	GAGAGAAGGCAAAGAAGATT	390	0.0045919
Akt1	ATCTGCCACAGTCTGAATGG	711	0.00837138
Akt1	ACACACGCTCTCGAGACAGG	896	0.0105496
Akt1	TACTTCCTCCTCAAGAACGA	776	0.0091367
Akt1	ACGGTTCTCAGTAAGCGTGT	453	0.00533366
Akt1	CTCACCCAGTGACAACTCAG	780	0.00918379
Akt1	CCCACTCAACAACTTCTCAG	745	0.0087717
Akt1	GAAGACATTCTGCGGAACGC	835	0.00983137
Akt1	CTTGCACTCCGAGAAGAACG	598	0.00704091
Akt1	TACCTGAAGCTACTGGGCAA	764	0.00899541
Akt1	CCACTGAGAAGTTGTTGAGT	425	0.00500399
Aldh2	CACCGTCAACCCTTCCACAG	938	0.0110441
Aldh2	CAAGTTGGCCACGTAGAGCG	733	0.00863041
Aldh2	GCTGCCATCGCATCCCATGA	921	0.0108439
Aldh2	GGACCATGTCCAAATCCACC	678	0.00798284
Aldh2	GAATGTGTATGACGAATTCG	441	0.00519238
Aldh2	CCGGAACTTACTGTCAGCGT	447	0.00526302
Aldh2	TTCCATGCTTGCATCAGGAG	500	0.00588705
Aldh2	AGCCCCCAACCATCAGCCTG	1002	0.0117976
Aldh2	CCGGCTGTTGTACCGATTGG	584	0.00687607
Aldh2	GGGAAAACCATTCCCATCGA	540	0.00635801
Aldoa	CCACGAGACACTGTACCAGA	693	0.00815945
Aldoa	AATGGCGAGACAACTACCCA	636	0.00748832
Aldoa	CCTTGCCCGGAGCCACAATG	782	0.00920734
Aldoa	AGGCAGATCATTCTTACCCT	369	0.00434464
Aldoa	TGCAGATGAGTCCACCGGTG	509	0.00599301
Aldoa	CAGTATGTTACTGAGAAGGT	397	0.00467432
Aldoa	GATTGGGGAACATACTCCCT	462	0.00543963
Aldoa	GCCAGCATCTGCCAGCAGGT	711	0.00837138
Aldoa	CACATTGCTGAAGCCCAACA	1049	0.012351
Aldoa	CATTGGCACCGAGAACACCG	957	0.0112678
Alg13	GTTTCGACGAGCTCGTCGCA	723	0.00851267
Alg13	GGTTGTAACCCAGACTCTCG	538	0.00633446
Alg13	GTGAATGACTCAGTACGGAA	415	0.00488625
Alg13	TTTCGACGAGCTCGTCGCAC	1039	0.0122333
Alg13	GATCTTGTCATTAGCCACGC	1047	0.0123275
Alg13	CGACGAGCTCGTCGCACGGG	781	0.00919557
Alg13	GACGAGCTCGTCGAAACTGG	671	0.00790042
Alg13	CTTGTCCTCCAAGTTGGTAG	534	0.00628737
Alg13	TCATTTACAACTACCACAAG	635	0.00747655
Alg13	CATTCACTCTGGATGTTTAC	489	0.00575753
Alkbh1	AGTCTCTCTAGTAAACTTCG	540	0.00635801
Alkbh1	GTTTACTAGAGAGACTGCGT	607	0.00714687
Alkbh1	CTATCGCCTAGACTCCACAC	1258	0.0148118
Alkbh1	AGGTTCAAGTCCCACCCTCT	703	0.00827719
Alkbh1	ATGACTAAAGAAGAGACCCA	420	0.00494512
Alkbh1	AAAGCCAGGTCAGAAGGGAA	484	0.00569866
Alkbh1	GTTTCTGGGAGTACAACTTA	367	0.00432109
Alkbh1	AGCCGTCATCGACTTCTCAG	871	0.0102552
Alkbh1	GAGGCCACCCAGGAGAAAGA	412	0.00485093
Alkbh1	GGTAGAAGCGGAAAAGCTTC	453	0.00533366
Alkbh5	AGAAAGACACGGACACGATG	1008	0.0118683
Alkbh5	CCCCGAGCGCAGCGACTACG	785	0.00924266
Alkbh5	ACAGGTTCCGACACCCGGAT	636	0.00748832
Alkbh5	ATCAACGACTACCAGCCCGG	943	0.011103
Alkbh5	CGGCGAGGGCTACACGTACG	899	0.0105849
Alkbh5	GGGACACCACCTCATCGATG	1199	0.0141171
Alkbh5	TCCCGGGACAACTACAAGGC	533	0.00627559
Alkbh5	CGTCGACGAGATCCCGGACT	627	0.00738236
Alkbh5	CGCCGGGTAAGGCTCAGCGG	862	0.0101493
Alkbh5	CGAGGGCTTCGTCAACAGCG	737	0.00867751
Alyref	CAGCACGACCTCTTCGACAG	843	0.00992556
Alyref	CTCACTCTGCTGTACGGCGC	816	0.00960766
Alyref	TCAGATGCTGATATTCAGGT	373	0.00439174
Alyref	CCCCGAAGCCGCTGTCGAAG	781	0.00919557
Alyref	GCCTCGATTCACCCGCGCGG	693	0.00815945
Alyref	AAGCTGAACCGGAGCCAGCG	760	0.00894831
Alyref	AAGGCTATGAAACAGTACAA	356	0.00419158
Alyref	GGAGACCGGCGGGAAGCTGC	799	0.0094075
Alyref	GCGGCGCCGCGGGCGATGGC	731	0.00860686
Alyref	ATCGCTCTGGACGAAGTTTA	423	0.00498044
Alyref2	CAGCACGACCTATTCGACAG	975	0.0114797
Alyref2	TGGACGAAGTTTAGGGACGG	531	0.00625204
Alyref2	AGAGCGATCGTAGTCCACAG	566	0.00666414
Alyref2	AACCAGCGCCGGGTGAATCG	776	0.0091367
Alyref2	CGGATGTACACTTTGAACGG	461	0.00542786
Alyref2	CAGCGCCGGGTGAATCGAGG	488	0.00574576
Alyref2	CGTGTCAAACCTGGACTTCG	922	0.0108557
Alyref2	AAGGCTATGAAGCAGTACAA	450	0.00529834
Alyref2	AGTGGTTTCGGTCTACTGTA	404	0.00475673
Alyref2	CTGCCGCCGCGGGCGATGGC	834	0.00981959
Angel1	GCTTGACATCACCCCGACGC	1449	0.0170607
Angel1	GCTAGTCCCTTATCCGCAAG	1034	0.0121744
Angel1	ACAGCACAATCTGCATACTG	745	0.0087717
Angel1	AGGACTGGGTGTAAAACGGA	253	0.00297885
Angel1	ATGATAAGGTATTTCCATTG	543	0.00639333
Angel1	CCTGCATGAGGTTGGCAAAG	673	0.00792396
Angel1	GCTCCTCAACCGGGACAATG	762	0.00897186
Angel1	GCAAAGTTACCCTCTACCTG	600	0.00706446
Angel1	TCAGGTTCTCTGCTGCCCGA	775	0.00912492
Angel1	GTGAGTCAGGGACAGAATTC	528	0.00621672
Angel2	CCAGCAGAGGAATGTCGCGG	580	0.00682897
Angel2	ATCTTCACGGTCCTCACACG	1224	0.0144115
Angel2	CTGTAGATCCTCCCACGGCG	566	0.00666414
Angel2	CCTCTCGCAGGATTTACTGG	553	0.00651107
Angel2	AGCTTAATGTCACCGCGCCG	793	0.00933686
Angel2	ACCACACATGACAATAGGAC	1033	0.0121626
Angel2	TCCAGTGTAACACTGGACGT	638	0.00751187
Angel2	GGATCAAGGATGCGTTGCTA	176	0.00207224
Angel2	CTGCTACTGAAGTATGGGTA	471	0.0055456
Angel2	AGGCCAAGTCTGGAATCACT	553	0.00651107
Ankrd17	AATAGGCAAGTTATCGACGG	679	0.00799461
Ankrd17	GGTGCGCTACTTAGTCAAAG	520	0.00612253
Ankrd17	AAAGAGTAACAATCATGCGT	640	0.00753542
Ankrd17	TTTCCGAGGGAGACTATGCA	499	0.00587527
Ankrd17	GGAGCTGAACAAAACGAGGG	403	0.00474496
Ankrd17	AATGCACACTGCTCTAATGG	857	0.0100904
Ankrd17	AAGGAGATGTAAATGCTGTG	526	0.00619317
Ankrd17	GCAGACGTCTTACTCCAGGC	826	0.0097254
Ankrd17	GTGGAGTTGTTGTTAGCTCG	454	0.00534544
Ankrd17	TGATGTAACCCTGTACATCC	431	0.00507463
Anp32b	GGAAGCACCTGACTCAGATG	824	0.00970185
Anp32b	AAGACAAGTTCTCGAACCTG	2	2.35482e-05
Anp32b	CAATGGATGGAAAAATTGAG	482	0.00567511
Anp32b	ACAGGTTCGAGAACTTGTCT	2	2.35482e-05
Anp32b	CCCCGACTCAGATGGAGAGG	536	0.00631091
Anp32b	CTCACACATCTGAACCTAAG	757	0.00891299
Anp32b	TCAACTTAGGTAGCTTCGGG	804	0.00946637
Anp32b	CCATCCAGATAGGACAGCTG	636	0.00748832
Anp32b	AGTGAAAATAGAATCTTCGG	258	0.00303772
Anp32b	TTGGCTGTGAGGTCACTAAC	839	0.00987846
Anxa2	GGAACTAAAAGCTTCCATGA	358	0.00421513
Anxa2	GTTTGTCAGGATGTTGACAA	334	0.00393255
Anxa2	CAGATCAGTCTTGTACACTG	687	0.0080888
Anxa2	GTGAGCAGATGATCTCAATG	727	0.00855977
Anxa2	AAGGAACCGACGTCCCCAAG	1325	0.0156007
Anxa2	ACACCAACTTCGATGCTGAG	761	0.00896008
Anxa2	GCTGATGGTCGCCCTTGCAA	795	0.0093604
Anxa2	TTGCCTTCGCCTATCAGAGA	474	0.00558092
Anxa2	TGACTACGAGCTGATTGACC	812	0.00956056
Anxa2	CTTATCTGGCCACCTGGAGA	481	0.00566334
Ap2m1	GAGAAGACACTTACCCTGTG	1	1.17741e-05
Ap2m1	CAGCTGATGAAACAAGCAAG	600	0.00706446
Ap2m1	CCTTTATCCCATATAGACGA	469	0.00552205
Ap2m1	ACGGAGAGTTTGAACTCATG	501	0.00589882
Ap2m1	TGAGAAGACACTTACCCTGT	1	1.17741e-05
Ap2m1	CCAAAGATACCGTACTACCA	949	0.0111736
Ap2m1	GTTCAAACTCTCCGTCGGGA	335	0.00394432
Ap2m1	TTACTTTGGCAAAATCAGCG	360	0.00423867
Ap2m1	TTCCCTTAGGAGGAATGCTG	546	0.00642865
Ap2m1	CCAGCTTCTTCCATGTTAAG	638	0.00751187
Apex1	CCAGGAGCATATCTTGAGTG	420	0.00494512
Apex1	AGGCTTCATCCCAACGCTGT	733	0.00863041
Apex1	CGGAGCTGACCAGTACTGAT	544	0.00640511
Apex1	AGATCCCCACATAGCACAAG	855	0.0100668
Apex1	AGAGGGCCCTGTCCTGTACG	706	0.00831251
Apex1	CAAATTCAGCCACAATCACC	779	0.00917202
Apex1	CGACGGGGAAGAACCCAAGT	457	0.00538076
Apex1	CCTCCAAGAGACCAAGTGCT	683	0.00804171
Apex1	CGAGCCTGGATTAAAAAGAA	169	0.00198982
Apex1	GCGGGCACTGGCGGGAAAGT	574	0.00675833
Api5	TATATCGAGGCCTTCCACTG	1009	0.0118801
Api5	TGTGTCACAGGAACGTTAGG	542	0.00638156
Api5	CAGCACCCTGACCACCCCAG	1226	0.014435
Api5	AAAGAGCTCACGGAGAAGAG	664	0.007818
Api5	TGGCGTGAAAGGCGGCACCA	1237	0.0145646
Api5	CACATAACTGAACTGCAGCT	802	0.00944282
Api5	CATACTCACTGAGTCCAAGA	452	0.00532189
Api5	CTCACCTGTCTGCAGAAGCT	571	0.00672301
Api5	GAGTGGACGACAGCAGCTGG	742	0.00873638
Api5	TAATTGCTTGACGTCGTATC	854	0.0100551
Apobec1	AGCACGGCTTTATCACCACA	806	0.00948992
Apobec1	AAGAAGACTTCAAACTCGTG	754	0.00887767
Apobec1	AAATAAACAGAGTTACATAG	383	0.00450948
Apobec1	CTAAGAAGTTGACTTCAACG	626	0.00737058
Apobec1	CTCAGGGACCTTATTAGCAG	485	0.00571044
Apobec1	GTTGATCTCATACAGCAGAC	725	0.00853622
Apobec1	CTGCTGTATGAGATCAACTG	696	0.00819477
Apobec1	GCCCTGGAGCACTCCCCGCA	915	0.0107733
Apobec1	GTAATGGAGCATCTGGTGTT	551	0.00648753
Apobec1	GGGGTGGAAGGCACAGTGTC	666	0.00784155
Apobec2	TAAAGAAAGCCTCCTCGGCG	735	0.00865396
Apobec2	TACCCAGTGACAATCTCGAA	579	0.0068172
Apobec2	CCAGTGACAATCTCGAAGGG	528	0.00621672
Apobec2	ACGTGGAATACAGTTCCGGG	359	0.0042269
Apobec2	GTGGTCGAAGTACAGAGTAA	456	0.00536899
Apobec2	CAAATCATCTCCATTCTGAG	709	0.00834783
Apobec2	TCACCAGAATGAGCAGACGA	614	0.00722929
Apobec2	CCCTCAAGTACAATGTCACC	837	0.00985492
Apobec2	TTTGAGAATCCGGTCAGCGC	665	0.00782977
Apobec2	TCAGCTCTTTCAGCTTCTCA	660	0.0077709
Apobec4	TTACCACATTCGGACAGGCG	714	0.0084067
Apobec4	ACTTTGAGTCCAATATGTGG	499	0.00587527
Apobec4	CAACAACTCCCCTTGTAACG	761	0.00896008
Apobec4	GTCACTTTGAGTCCAATATG	604	0.00711155
Apobec4	AGAAGACCATCAGTGAAGTA	508	0.00598124
Apobec4	TATGGAATATGACTGCATCA	638	0.00751187
Apobec4	TCCCGGTGCAGTTGCTAGCA	526	0.00619317
Apobec4	TACCTCAGCATGGAACCGTA	745	0.0087717
Apobec4	CTGAGAAAAGAAAACACTAA	277	0.00326142
Apobec4	CTCCCAGCTATAAAGGGCTG	480	0.00565156
Aqr	AATTCTGTCATAGTGAATCG	448	0.00527479
Aqr	GAGGTTGCCAAACCCAACAT	673	0.00792396
Aqr	GCCAGGCTCTACTCCCCACG	944	0.0111147
Aqr	AGCTTATCTCGCTCCCGATG	998	0.0117505
Aqr	AGAAGCAAAGACCTTAATTG	613	0.00721752
Aqr	TCTGATGAATACTGACTGCG	514	0.00605188
Aqr	CCCTACTGAGTACTATTCTG	543	0.00639333
Aqr	ACGGTTACAAAAGAGTCTGG	277	0.00326142
Aqr	CTCATTCACCATACAGCAGA	505	0.00594592
Aqr	CAGGGCATGCTGGATGACAA	571	0.00672301
Arcn1	TCCATAGACTCAAGAACGTG	687	0.0080888
Arcn1	AGTATTCCGAGCAGTCAGAG	584	0.00687607
Arcn1	ATTCCAGACGCATCCAAATG	648	0.00762961
Arcn1	AACATTCTCCCGGTATCCCA	543	0.00639333
Arcn1	TGAGATGCGGCGTAAAGCAA	453	0.00533366
Arcn1	GTGAGGCTAAGGCTGAGATG	715	0.00841848
Arcn1	CACACTAGACAATACCTGGC	791	0.00931331
Arcn1	CTCCACCTATTAATATGGAA	262	0.00308481
Arcn1	TTTAAGGCTCTTCTCAAGGG	543	0.00639333
Arcn1	AGACAGGGGAAAAAAGCACC	393	0.00462722
Arhgef28	CACTGACCTACCTTCAAGTG	743	0.00874815
Arhgef28	AGAGTCTTGGAGTCTCGTGG	481	0.00566334
Arhgef28	GGATGCACTCCGGGATTCCG	578	0.00680543
Arhgef28	AGACTCGGGACTCGTATGGG	426	0.00501576
Arhgef28	TTCCACTGTCAGGGCAAACG	745	0.0087717
Arhgef28	GGAGTCTGGCAGATCACCAT	567	0.00667591
Arhgef28	CCTTCTTCCTCTATGCCCAT	777	0.00914847
Arhgef28	AAGAACTGGACTCCCCAGCG	539	0.00634624
Arhgef28	ACCTTTGAAGCGACCCGTAG	615	0.00724107
Arhgef28	TTACCTTAGATTTGTTCCGT	652	0.00767671
Arid5a	CAGCTACTAGCACCCGTGAG	529	0.0062285
Arid5a	TCAGATGCCGCACATATGGG	465	0.00547495
Arid5a	AGCGACACACGCCCATCGAG	1162	0.0136815
Arid5a	GGCCTGCAATCCTTCCCGGG	633	0.007453
Arid5a	CAGGTTTCAGCACCTCGGTG	321	0.00377948
Arid5a	CATACACGTTCTTCCAGAGG	695	0.00818299
Arid5a	ATCCCCACCCCACACCAGAT	981	0.0115504
Arid5a	GAAGAAGGCCAAGGACTCAG	717	0.00844202
Arid5a	CCTGCCTCAGGGGAGTCCTG	655	0.00771203
Arid5a	ACTGGCCAAAAAGAAACTCC	319	0.00375594
Arl6ip4	AGCGCTCGAGAAGTCGCAGT	492	0.00579285
Arl6ip4	GGAGGCTGAACAGTTCCTCG	739	0.00870105
Arl6ip4	AGTCGCAGTCGGTCCCGTAG	703	0.00827719
Arl6ip4	TCTGTGCCACTGATCCAGTG	802	0.00944282
Arl6ip4	GCAGTCGGTCCCGTAGTGGT	549	0.00646398
Arl6ip4	GTGGTCCTCACCCTCAACCC	927	0.0109146
Arl6ip4	GAAGAAGCGAGCGAAGCACA	642	0.00755897
Arl6ip4	AGTCAAGGAGAAGGCAGTGG	603	0.00709978
Arl6ip4	GGGGAGGACAATGATGGCCC	577	0.00679365
Arl6ip4	GGAGCTAGAAGAACTGGAAG	387	0.00455657
Arpc1b	AATGAGAACAAGTTCGCCGT	786	0.00925444
Arpc1b	CCGCATTGTGACCTGCGGCA	696	0.00819477
Arpc1b	CACAATGCGGTTACTCTCAG	730	0.00859509
Arpc1b	CCAGTCCAGGCTGAGCACTG	1152	0.0135638
Arpc1b	GAAGCGAGCACTCACGTGTA	909	0.0107027
Arpc1b	CACGAGCTGAAGGAGCACAA	623	0.00733526
Arpc1b	AACGGCCAGCCCCTACACCG	1255	0.0147765
Arpc1b	GATCCGGAGGATGACCAGTG	706	0.00831251
Arpc1b	CTCTTTCAGCGTGGCAACCC	1022	0.0120331
Arpc1b	CAGCTGTGGCTGGGTGCATG	603	0.00709978
Ascc3	GCAAAAATGTAGCAACATCG	537	0.00632269
Ascc3	TGACTGATGCCGTATGCTAG	694	0.00817122
Ascc3	TGCTCGAATGTAGTACTGAG	537	0.00632269
Ascc3	TAGAGTTATTGAACTAACTG	525	0.0061814
Ascc3	CTTCAAACCTACATCAGCCG	683	0.00804171
Ascc3	TGTCGCTCCAATGAAAGCCT	494	0.0058164
Ascc3	TTGAAACTTATGATCGCTCG	890	0.0104789
Ascc3	GTGCGAGAATTATTCTCCGA	363	0.004274
Ascc3	AAACCCATGTAACGATAGAG	635	0.00747655
Ascc3	GAAACATCAGCATTCATAGC	541	0.00636978
Atp1a1	GTACACGACGATGCCACGTG	1702	0.0200395
Atp1a1	ACGAAGCAGAGGTTATCCAC	621	0.00731171
Atp1a1	AATCTGTTCCGTATTTACGA	484	0.00569866
Atp1a1	GAAAATGAGCATCAATGCGG	563	0.00662881
Atp1a1	GGTGGCTGACGTCTTGTCAA	717	0.00844202
Atp1a1	TCACTGCCAAGCGCATGGCG	864	0.0101728
Atp1a1	CAACTCACATCATCGTTTGG	741	0.0087246
Atp1a1	AAGTGCATTGAAGTCTGCTG	734	0.00864218
Atp1a1	GTTCACTGGAATGTTGAGGC	531	0.00625204
Atp1a1	TGCAGCTCCATCCTTCTCCA	749	0.0088188
Atp2a2	GGACCTTGGTACTTCCAACT	451	0.00531012
Atp2a2	GATAACAGAAGTACAACCAA	523	0.00615785
Atp2a2	TGCTAACTTCATCAAATACG	840	0.00989024
Atp2a2	AATGGGCAAAGTGTATCGAC	636	0.00748832
Atp2a2	TGTCTTGATTAACAGCTCGG	510	0.00600479
Atp2a2	TAGACCAACCTGACTTTCGT	869	0.0102317
Atp2a2	GCGTGCAAACGCCTGCAACT	689	0.00811235
Atp2a2	GCAGAAGCTAGACGAGTTTG	578	0.00680543
Atp2a2	TTCAACTCGAGCAAAACAGC	697	0.00820654
Atp2a2	CTACAAGCCCGTCATACTGA	792	0.00932508
Atp5a1	TGGTCAGAAGCGGTCCACTG	699	0.00823009
Atp5a1	GCTCCCGCACAGAGATTCGG	775	0.00912492
Atp5a1	TTATTGGTGACAGACAGACT	394	0.00463899
Atp5a1	CGTGTGTTAAGCATTGGTGA	407	0.00479206
Atp5a1	TCCATCAATAGCATTACCGA	610	0.0071822
Atp5a1	AGGATAGGCCTCACGACCAG	1080	0.012716
Atp5a1	GGGAGCCAAGTACTGAAGCG	524	0.00616962
Atp5a1	AACTTGGAACCCGACAATGT	652	0.00767671
Atp5a1	CCAACAGCTCCTCGCCAACG	1015	0.0119507
Atp5a1	GAAGTCGAGTGTTAGAGGCA	568	0.00668768
Atp5b	GCGCTTACCAGGATGAACCC	745	0.0087717
Atp5b	CTGCTGGCCCCATACGCCAA	690	0.00812412
Atp5b	CCCACCCTAGCCACCGACAT	1184	0.0139405
Atp5b	GACTGCCACGATTCGCCCGG	1115	0.0131281
Atp5b	AAATACAGAGTAACCACCAT	655	0.00771203
Atp5b	GTGGACGTCCAGTTCGATGA	758	0.00892476
Atp5b	TCAAACCAGTCAGAGCTACC	754	0.00887767
Atp5b	GGAGAACCTATTGATGAGAG	309	0.00363819
Atp5b	CACGGTCAGAACTATTGCTA	487	0.00573398
Atp5b	CTGAGCCAGCCTGGGTAAAG	676	0.00795929
Atp5c1	CCGATGTGGTCCTACCATTG	709	0.00834783
Atp5c1	TGTCATTCAAAGATGTGGGA	403	0.00474496
Atp5c1	GGCTGATATTAAGGCACCTG	562	0.00661704
Atp5c1	AGAACCTGTCCCATACACTC	770	0.00906605
Atp5c1	AAGAACCTGTCCCATACACT	677	0.00797106
Atp5c1	TCCAGAATTTAACAACTCAA	271	0.00319078
Atp5c1	TGGTGCTATTCACTCCTCAG	723	0.00851267
Atp5c1	TACCAAGTCTATGAAGATGG	539	0.00634624
Atp5c1	GAAGTTATGATTGTTGGAGT	360	0.00423867
Atp5c1	TTTGATGGACTTCAGTCTCC	850	0.010008
Atxn1	CTGGGGTGATGACGTCACGA	719	0.00846557
Atxn1	CTGCAGGATTAGTCAACCCG	703	0.00827719
Atxn1	CAGCAGTCGTGATACCTCCG	1094	0.0128809
Atxn1	ACTATATTGCACAACCACCT	564	0.00664059
Atxn1	CTCAGGTAGCCGATGACAGG	683	0.00804171
Atxn1	TACATAAAGCACTGTCCGCA	951	0.0111972
Atxn1	CCAATACAGTGGGCCTTACG	852	0.0100315
Atxn1	GGAGAAAAGCCGGAGGTATG	485	0.00571044
Atxn1	GACAAGAGCGGCCTGCACCT	830	0.0097725
Atxn1	CAACCACTGCGTGGAGGGTG	724	0.00852444
Atxn1l	AGACCCAATAAACTGCAGTG	657	0.00773558
Atxn1l	CGCTTCTGAATGGTCCCGAG	479	0.00563979
Atxn1l	TTCTCAGGACTATCGTGTGG	757	0.00891299
Atxn1l	TCACTCGAATACTCAACCAC	688	0.00810058
Atxn1l	GGACTGCGGGTAGAACACAC	793	0.00933686
Atxn1l	GCCGGTGGTGGAATGCATGG	429	0.00505109
Atxn1l	GTATGGCATGCTGTACAAGG	733	0.00863041
Atxn1l	TCTGCGAGGAGAGAGGCATA	599	0.00705268
Atxn1l	GGTCCAGACTTGATGCCACC	773	0.00910137
Atxn1l	AGAGCAGACTGGCCCTCCTG	735	0.00865396
Atxn2	AAAGTACAGAATCCAGTTCG	564	0.00664059
Atxn2	TTGCATACCCTCAATAGATG	658	0.00774735
Atxn2	ACTCCGGTCATCATTCTCAA	505	0.00594592
Atxn2	AGAGGTCGGAACAGTAGCAA	517	0.00608721
Atxn2	TCAGATTTCAACCCGAACGC	509	0.00599301
Atxn2	GTTGCTACCAAAACAGTCTG	704	0.00828896
Atxn2	ACACCGGCTCGCACGCCGGG	930	0.0109499
Atxn2	AAATTCTAGGCCACTAGACA	569	0.00669946
Atxn2	CTACTAAGCAAAAATAGAGA	275	0.00323788
Atxn2	TTTCCTTCTAGTCTAATGGA	515	0.00606366
Atxn2l	ACTCTGAAGAGTTTCGGCAG	391	0.00460367
Atxn2l	AAGGTCTTGGCACCTCTCAG	694	0.00817122
Atxn2l	GATGCAGCAGTTCTCGAGGA	587	0.00691139
Atxn2l	AGTAAAAGAACTCCCAACCA	428	0.00503931
Atxn2l	GAAGGTGCTTCAACGTTGGG	523	0.00615785
Atxn2l	GGGTTCTACTTGTGACGTAA	393	0.00462722
Atxn2l	CAAACCGGCAGTCCTCCAGT	910	0.0107144
Atxn2l	GTTCGAGAAGGTCCCCGGGG	587	0.00691139
Atxn2l	TCTTCTTTCAAGATCCGGGA	354	0.00416803
Atxn2l	CTAAGATGCTTTCGGCTCCG	714	0.0084067
Auh	CAATGTCATTGATCACCGAT	889	0.0104672
Auh	CGGAGGATGAGTTGCGCGTG	834	0.00981959
Auh	GGGCTAGGGGTACCGCCCCG	463	0.00545141
Auh	GAGGAGGGGCTACAGCTCGG	496	0.00583995
Auh	GGTTTAGTTATCAAAAGCGG	320	0.00376771
Auh	CAGCTCCAGACCCCCTCCGA	848	0.00998443
Auh	GAGCAATTCATACCTCCGCC	688	0.00810058
Auh	CTACCAGCACAGAATATCCC	805	0.00947815
Auh	AACGGTTGGCGTCCGCCTGG	754	0.00887767
Auh	TCGGGATTAACAGAGCTTAT	304	0.00357932
Bach1	TCTAAGCGTACACAATATCG	797	0.00938395
Bach1	TACTTCCACTCGAGAATCGT	627	0.00738236
Bach1	CTGATCCTGATACCCAACCA	760	0.00894831
Bach1	ATCTGAGGATCGGAGTAGTG	537	0.00632269
Bach1	CCCAAAACACTCAAGTTCAG	613	0.00721752
Bach1	TGACTGCTCATATGTGTGTA	493	0.00580463
Bach1	ACGCCTGACTGACACTGTCC	874	0.0102906
Bach1	CGAAGGCTGCTCAAGCAACT	501	0.00589882
Bach1	TCTGGCCTACGATTCTCGAG	661	0.00778268
Bach1	TTATATCTGAAGTCTAGCAT	355	0.0041798
Bach2	ACGTGACGCTGATCGTGGAG	757	0.00891299
Bach2	AATTACGGACAGCCCCACGT	677	0.00797106
Bach2	CTCCTCGTATTCCTACGCAG	768	0.0090425
Bach2	GTTCGGTATAACGAAAGGTG	405	0.00476851
Bach2	TCCAGTGCATTCATACTCTG	585	0.00688784
Bach2	CTGGCAATAGCCTCAAGCCG	706	0.00831251
Bach2	GTGTAGGCAAACTGTAGCAG	719	0.00846557
Bach2	TGCGTGCCAGCGCCCCCAAG	812	0.00956056
Bach2	TGAGGTACCCACAGACACCA	846	0.00996088
Bach2	CCAGAAGTATTCACTGCATG	611	0.00719397
Bak1	GCCCACAGCCTATTTAAGAG	402	0.00473319
Bak1	GCTTACCTGTTGGGTTCCAG	594	0.00699381
Bak1	GGAACTCTGTGTCGTAGCGC	641	0.00754719
Bak1	GGTAGACGTACAGGGCCAGA	591	0.00695849
Bak1	GATCTTGGTGAAGAGTTCGT	504	0.00593414
Bak1	AGGCTCTTACCAGAAGGGGA	388	0.00456835
Bak1	GCAGGAACAGGAGACCCAGG	609	0.00717042
Bak1	TCTTCACCAAGATCGCCTCC	1003	0.0118094
Bak1	CGAGATGGACAACTTGCCCC	638	0.00751187
Bak1	GCAGGAGGCTCTTACCAGAA	299	0.00352045
Bard1	ATCTGTAGCTAAGATCAACA	633	0.007453
Bard1	CTCTTAGGAACAGCTACAGG	584	0.00687607
Bard1	ATACAAAGGAAAACTACCAA	362	0.00426222
Bard1	TCACATCCTCCTAAGCACAC	1359	0.016001
Bard1	GGGAGTAATGGAAATCGTAA	415	0.00488625
Bard1	TGGCCACATCGATATAGTCA	686	0.00807703
Bard1	TCTATTTCACCATTTACCCG	529	0.0062285
Bard1	TGAATTGTTCAGCAGAGGTG	496	0.00583995
Bard1	TTCAAAAGACAACACATCTA	781	0.00919557
Bard1	AGTACAAACACAGCCTCAAA	558	0.00656994
BC005561	ATTTCAATGAGTCTACCACA	665	0.00782977
BC005561	TGATAACTTAATAACCCCTG	460	0.00541608
BC005561	GATATCGCTTATATGGACAG	496	0.00583995
BC005561	CAATGCTTTACAAAACAAGA	435	0.00512173
BC005561	AGCTCTATACAAGGAAGATG	458	0.00539253
BC005561	TCGGTCATAGCAAAGAAGTG	424	0.00499222
BC005561	TGGCACTGCAAGGTCATACA	466	0.00548673
BC005561	TGCATCCTTTAATCTCTGAG	471	0.0055456
BC005561	TGCATGTCTGAGGAACTATG	730	0.00859509
BC005561	ACTGCTGCGATTGTTTGATA	367	0.00432109
Bcas2	TTCAAAGGCAGAATAATCCG	549	0.00646398
Bcas2	AAAAAAATGACATTACTGCA	439	0.00516883
Bcas2	CTGTTCTCGTTCTTAGGCGG	562	0.00661704
Bcas2	TAGCTCAGGTAGTTCTTGGT	401	0.00472141
Bcas2	AAACAATTCTATGGCTCAGT	405	0.00476851
Bcas2	GATTCTCGATCCGGACCGCC	741	0.0087246
Bcas2	GCATGGATGCAATGCCTGGA	713	0.00839493
Bcas2	TCAGGTAGTTCTTGGTAGGT	357	0.00420335
Bcas2	TTGAATTACTCAGCATGAAA	320	0.00376771
Bcas2	TCATAGCCTTGGTCAAAATA	419	0.00493335
Bcl2	ACATCTCTGCGAAGTCACGA	768	0.0090425
Bcl2	CGTGGCAAAGCGTCCCCTCG	982	0.0115622
Bcl2	TACATTATAAGCTGTCACAG	479	0.00563979
Bcl2	GGCCCAGCGGTGGCAACGAG	901	0.0106085
Bcl2	GTTCGGTGGGGTCATGTGTG	417	0.0049098
Bcl2	AGGGTCAGATGGACCACAGG	732	0.00861864
Bcl2	AGCCATGTCCCGGTGCACAG	789	0.00928976
Bcl2	TGGAGGAACTCTTCAGGGAT	384	0.00452125
Bcl2	TGCGGACGCGGCGCCCCTGG	795	0.0093604
Bcl2	TGTCACAGAGGGGCTACGAG	741	0.0087246
Bcl2l1	AGTAAACTGGGGTCGCATCG	766	0.00901896
Bcl2l1	TGTCGAAGAGAATAGGACTG	294	0.00346158
Bcl2l1	CTGCTCAAAGCTCTGATACG	594	0.00699381
Bcl2l1	CAGGCGATGAGTTTGAACTG	654	0.00770026
Bcl2l1	ACAGCAGCAGTTTGGATGCG	619	0.00728816
Bcl2l1	TCCTACAAGCTTTCCCAGAA	524	0.00616962
Bcl2l1	CCAGTGGCTCCATTCACGGC	768	0.0090425
Bcl2l1	GGTTGCCATTGATGGCACTG	660	0.0077709
Bcl2l1	CCCAGCTTCACATAACCCCA	630	0.00741768
Bcl2l1	TTTCGGGATGGAGTAAACTG	532	0.00626382
Bcl2l11	TCGCCGTCGGGATTACCTTG	638	0.00751187
Bcl2l11	GTTGACTTGTCACAACTCAT	645	0.00759429
Bcl2l11	ATCTGGTAGCAAAAGGGCCA	484	0.00569866
Bcl2l11	AAAAGAGAAATACCCACTGG	344	0.00405029
Bcl2l11	CAACCACTATCTCAGTGCAA	770	0.00906605
Bcl2l11	AGTTCTGAGTGTGACAGAGA	241	0.00283756
Bcl2l11	GAAGGGGACCGCTGCCCCCA	1100	0.0129515
Bcl2l11	AAGGCCTGGCAAGGAGGACT	500	0.00588705
Bcl2l11	GCCTCCCCAGCTCAGGCCTG	877	0.0103259
Bcl2l11	AGGTAATCCCGACGGCGAAG	423	0.00498044
Bcl6	GTTGACAGGCCACTGTACAG	729	0.00858331
Bcl6	CACATGCAGGAAGTTCATCA	658	0.00774735
Bcl6	CAATCAGAATGCCAAACCCG	577	0.00679365
Bcl6	TCCGGTTCAAGGGTGCATTG	751	0.00884234
Bcl6	GTTGCTGTGACACAAACTGG	879	0.0103494
Bcl6	ATCCTGAAATCAGCCCTGAG	612	0.00720575
Bcl6	TGTTCACGAGATTATTGAGC	440	0.0051806
Bcl6	TATGGGCTCTAAACTGCTCA	630	0.00741768
Bcl6	CAAGAACGCCTGCATCCTTC	930	0.0109499
Bcl6	CATGACATCATGGCCTACCG	902	0.0106202
Bclaf1	TACCTGTTGGAATCGTCAAG	482	0.00567511
Bclaf1	CACTCTAGGAGTCCTAGACG	589	0.00693494
Bclaf1	GTGCACTGTACTAAGCATGG	674	0.00793574
Bclaf1	CTCCAAGAGAGGAATCTAGG	400	0.00470964
Bclaf1	TTCATCTCACCGGAATACTG	687	0.0080888
Bclaf1	GACAGGAGATTTGCTATATG	429	0.00505109
Bclaf1	AAGCACAAGGAAGAAGACAA	578	0.00680543
Bclaf1	GAGATTATCGTCGAGATTAC	521	0.0061343
Bclaf1	GAAAGGGTCAGAGAAAGGCA	491	0.00578108
Bclaf1	AACTCATCAATAGATTCAGA	258	0.00303772
Bclaf3	GATGATACGAATTCACACGA	680	0.00800638
Bclaf3	ATGTTTGTGACGGTAGTCGT	710	0.00835961
Bclaf3	AAGATGAATTGAGACACCAG	563	0.00662881
Bclaf3	TGTTATATCCCTACAGTGCA	641	0.00754719
Bclaf3	TGGAGCCTTGCAATGACAAA	373	0.00439174
Bclaf3	AAAGACCTACAGATGCAGCA	645	0.00759429
Bclaf3	TCACATGATTTGGTTGCTAT	459	0.00540431
Bclaf3	GATTGTTTCAGTACTACAAG	451	0.00531012
Bclaf3	ATGATACGAATTCACACGAG	4	4.70964e-05
Bclaf3	TGATACGAATTCACACGAGG	4	4.70964e-05
Bicc1	GTATTGAGCGACAATGTGGT	369	0.00434464
Bicc1	TTCTCCTAAATCAAACTCGG	456	0.00536899
Bicc1	GAAGATGGATGTCTCGCACA	991	0.0116681
Bicc1	TGACGTATTGAGCGACAATG	860	0.0101257
Bicc1	ACGTCAAACACATCATGCAG	1068	0.0125747
Bicc1	AGTGCCCACATACGGGCACA	462	0.00543963
Bicc1	AGACATTGAAGTGGACCCAC	806	0.00948992
Bicc1	GGTGCTACAGTCACAGTACG	709	0.00834783
Bicc1	CAGTTACCCGAATCCTTGCT	799	0.0094075
Bicc1	GAAAAAAGTCTTCCCCACTT	558	0.00656994
Bid	CCACAACATCCAGCCCACAC	1622	0.0190976
Bid	GCCAGCCGCTCCTTCAACCA	647	0.00761784
Bid	CATGAATGGCAGCCTGTCGG	581	0.00684075
Bid	CGAGATGTCTGGCAATGTTG	502	0.00591059
Bid	GCCTGTGCAAGCTTACTGGG	671	0.00790042
Bid	CAGCAACGGTTCCGGCCTGG	917	0.0107968
Bid	TGGCTGTACTCGCCAAGAGC	655	0.00771203
Bid	GAAGACGAGCTGCAGACAGA	755	0.00888944
Bid	ATCACAGACCTGCTGGTGTT	542	0.00638156
Bid	GGCTAGCTGTCTCACCAGTG	714	0.0084067
Bms1	ACTTTGAAGACCTAGAAACG	509	0.00599301
Bms1	AAACGTCAAGTGTGACCGAA	738	0.00868928
Bms1	TGGACAGAAGTCTACCCGGT	493	0.00580463
Bms1	GCACACCCTCTGCGCGACAG	1023	0.0120449
Bms1	GCTGTCTATGTCGACCTAGG	815	0.00959589
Bms1	GGTAACTACATGATGGGTAG	585	0.00688784
Bms1	GAAAAAGCATCACATTCCAG	926	0.0109028
Bms1	GCTTGCACCCTCTATCTGGC	709	0.00834783
Bms1	GCCCGTCAGCAGCCCACCAG	775	0.00912492
Bms1	TCTAGCTAAAGTAGCAGATC	658	0.00774735
Boll	AAGGATAAGAAACTCAACAT	384	0.00452125
Boll	AGGTTCTAGTCTCATGCCAG	467	0.0054985
Boll	TGTATCTGACCACTTCAACT	770	0.00906605
Boll	TGCACAAAAAATCTTACAAG	446	0.00525125
Boll	GAATCACTTACAGGCCAAGA	487	0.00573398
Boll	CCTTTGAATAACCCAACAAG	494	0.0058164
Boll	CCTAACCGCATCTTTGTAGG	528	0.00621672
Boll	ACAGAGCTGGAGTGTCCAAA	423	0.00498044
Boll	GAAAATAAGCAACGCCATTA	454	0.00534544
Boll	TATGCAGGCTGTTGATAAAC	530	0.00624027
Bop1	GTGGGCACAGATACAAATCG	585	0.00688784
Bop1	AATTCATCGTACCATGCCAG	895	0.0105378
Bop1	AGACACTGAGGCAACGGACA	672	0.00791219
Bop1	AACGTATCTACAAGCCCCTG	820	0.00965476
Bop1	TGGGGTGGATCAAGCCTCGA	431	0.00507463
Bop1	AGATGACAGGGCGTGATCTG	613	0.00721752
Bop1	GCAGCTACCAGGCATATGGT	678	0.00798284
Bop1	GTGGGTTGTAAGACTCGGCA	547	0.00644043
Bop1	GCGGTGACGAAGACAACCAT	821	0.00966653
Bop1	CTGTCAGAGAGACTGGAGTC	544	0.00640511
Brd2	CTGGTACAGAAGCCATTGTG	639	0.00752365
Brd2	AAAAGGCGTTAAACGGAAAG	536	0.00631091
Brd2	GTGCCATAGCCACAACATCG	1210	0.0142467
Brd2	GAGGATTTGGTCAACCCAGG	540	0.00635801
Brd2	ACAGTGGTAGGTATTTCAGG	472	0.00555737
Brd2	TGGACATGGGTACTATCAAG	581	0.00684075
Brd2	TGACATCATTAAACACCCCA	364	0.00428577
Brd2	AGTAGCATCCATGCCACAAG	864	0.0101728
Brd2	ACTGCTACTTTCCTCACTGG	813	0.00957234
Brd2	CAACACCAGAGCTCTAAGAA	404	0.00475673
Brix1	GAATGGTGAACGTAAACACG	672	0.00791219
Brix1	AAAAACAGGATCTCTATATG	415	0.00488625
Brix1	CAAACGGCTGACTCTTGGGA	591	0.00695849
Brix1	GCCAGCTAAGCAGGCCGATG	762	0.00897186
Brix1	CAGAACAAGACACTTAATGC	650	0.00765316
Brix1	TCCTTTAACAAAGCATAATG	485	0.00571044
Brix1	TAAATTATTTGTGATAAATG	329	0.00387368
Brix1	AGTCATCTTTAATTCAGCCA	347	0.00408561
Brix1	TATTCCAGGTCCGGTTTGCA	684	0.00805348
Brix1	AGAAGAAGACGCTGCTCTAG	782	0.00920734
Btf3	TCCCATAGGGAACTGCTCGT	820	0.00965476
Btf3	TCAGCTGCTTTGTCTCAGCG	449	0.00528657
Btf3	TGCTCGTAGGAAGAAGAAGG	444	0.0052277
Btf3	GAAGAAGGTGGTTCACAGAA	422	0.00496867
Btf3	CAGTTTCTTATCGTCTGCTG	604	0.00711155
Btf3	AACTGCTCGTAGGAAGAAGA	426	0.00501576
Btf3	TTAGGGGTGAACAACATCTC	583	0.0068643
Btf3	CCAAGCTGGTTGAGGATGCT	546	0.00642865
Btf3	TGGTGAAGGTGTTTGCTGCC	526	0.00619317
Btf3	GCAGTTTGGCGAGTTTCTCC	586	0.00689962
Btk	TGGAACACACAACGTAATGG	674	0.00793574
Btk	AATCCGGTACAATAGTGACC	630	0.00741768
Btk	ATGAATATGACTTTGAACGT	429	0.00505109
Btk	TGGAGGAGAGCAACCTACCG	542	0.00638156
Btk	CTTGAAAAAACCGCTTCCCC	775	0.00912492
Btk	TTGACTTCGAGTCATGTGCT	476	0.00560447
Btk	ATCATGGGAAATTGATCCAA	372	0.00437996
Btk	TTCATTACAGAGGAGAGGTG	377	0.00443883
Btk	GCGTGGAACACACAACGTAA	673	0.00792396
Btk	AAATGACTTACAATTGCGAA	532	0.00626382
Bud13	AATTACGATGAGACTTCCTG	477	0.00561624
Bud13	AGGTACCTAAGGAACCATGA	464	0.00546318
Bud13	TCATGACGGACCCTCCTAGG	549	0.00646398
Bud13	TTTGTGCAGTTCCAAATCAG	592	0.00697026
Bud13	GAGAGTTCGTCATGACACCC	561	0.00660527
Bud13	CACGGAAAAAAAAAAATTCG	170	0.0020016
Bud13	AGAGGATGGAGATTTGCCTG	497	0.00585172
Bud13	TTTGCTTGCCGTTTCCGTGG	1037	0.0122097
Bud13	GTCCCGAGGCCGGTCGCAAG	607	0.00714687
Bud13	TCATGACGGGCCTTCCTGGG	596	0.00701736
Bud31	GGAGTTGATTGAACCAACGT	626	0.00737058
Bud31	GCTGAAACTGAACCCCATGA	585	0.00688784
Bud31	ACAAAAACCTGATTGCAAAG	483	0.00568689
Bud31	AGCTGAAACTGAACCCCATG	8	9.41927e-05
Bud31	AAGAGGAAAGCCATAAGCAG	626	0.00737058
Bud31	ATTGCAAAGTGGAAGAAGCA	403	0.00474496
Bud31	AGCCGGAAAGCACCTCCAGA	714	0.0084067
Bud31	AGAGGAAAGTGGAATCTCTG	408	0.00480383
Bud31	AAAGAGGTCGAAGATATAGC	576	0.00678188
Bud31	TATGAATACTGCATTAAAGA	438	0.00515705
Bysl	CCTGGTGGCTTGATACATGG	606	0.0071351
Bysl	CGGGTCCTGGAAGTTTACCG	513	0.00604011
Bysl	AGTTTACCGAGGAGTCCGGG	584	0.00687607
Bysl	AAAATCCGTCTGCTTAGCCG	653	0.00768848
Bysl	TGAACAAGAATCCTCCCGTG	776	0.0091367
Bysl	GCAATGTCATCTCGCACTCG	1092	0.0128573
Bysl	GGATGAGGAGTGGCCTACCC	746	0.00878347
Bysl	CCAGGCTCCAGGCTTGAACA	658	0.00774735
Bysl	CTGGGAACGCAGTGCGCGCG	1006	0.0118447
Bysl	CGCGTGGCGCGCTCTCGCGG	761	0.00896008
Bzw1	CAGAAGGACACCAGTCAACA	867	0.0102081
Bzw1	ACCAGCAGACCATTGGGGCA	668	0.00786509
Bzw1	CATCTGCCAGTGTACCACCC	967	0.0113855
Bzw1	GAGTCTTCGGAAAGTCAGCA	507	0.00596947
Bzw1	GTCCTTGAATGGGTCCCCAC	619	0.00728816
Bzw1	CCGTAACCAGCAGACCATTG	822	0.0096783
Bzw1	CCTATCCAGATGAAAAAGAG	391	0.00460367
Bzw1	CGCTACAAATACCTGGAGAA	273	0.00321433
Bzw1	AATGAGAATTTGGTTAAAGA	205	0.00241369
Bzw1	AACTGAAACTGGTACTGATT	401	0.00472141
Bzw2	GGAGGAACACGCATAGACGA	576	0.00678188
Bzw2	CTAAGTACTTCACTGACGCG	1081	0.0127278
Bzw2	GAAAAGCCAACTTAGACAAG	561	0.00660527
Bzw2	AGTGTATCCCTGAAAACTGT	541	0.00636978
Bzw2	GAAAAGCTTGACAGCGAATG	744	0.00875993
Bzw2	AAGTGTATCCCTGAAAACTG	525	0.0061814
Bzw2	TCAGGAATGCCCCATCAAGG	686	0.00807703
Bzw2	AACCATCCGAAACTATGCTC	851	0.0100198
Bzw2	AGAGTGTGTCTGCATAGCGA	463	0.00545141
Bzw2	CAAAGTTGGCAATGCTGTCT	544	0.00640511
C1qbp	ATCAGTCAAGAATTCAACGA	588	0.00692317
C1qbp	GTTGAAGTTACCAAGACTGA	544	0.00640511
C1qbp	CGTACGCTGAGCAAACCGAA	506	0.00595769
C1qbp	TACTTGCCGTTCTAGGATCA	745	0.0087717
C1qbp	TCCTCCTCACCATCAAATGT	779	0.00917202
C1qbp	GAGTTGATGTCAGTTCTGGC	675	0.00794751
C1qbp	GCCGCACGCGCAGGGAACCG	840	0.00989024
C1qbp	TCCAACATTTGATGGTGAGG	481	0.00566334
C1qbp	GTCTGGAGATTGGGAGCTGG	435	0.00512173
C1qbp	CGGCCTCCGAACCGCCATCC	988	0.0116328
Cactin	AGAACACTTTAAGACGTGGG	582	0.00685252
Cactin	TCCCACAGGTCAGATTCGGA	551	0.00648753
Cactin	GTGTACATGGAACTAGAGCA	596	0.00701736
Cactin	AGGCAGAACACTTTAAGACG	553	0.00651107
Cactin	TCTGTCTAAGAACATCTTGG	730	0.00859509
Cactin	CGCCTGAGGAGAAGCGTGCG	739	0.00870105
Cactin	AGCTGAAGGAGCGCAACAAG	791	0.00931331
Cactin	AAAGACGTACAACCAGCTGC	1084	0.0127631
Cactin	GTAAGGGTCACAGGCGCTCG	738	0.00868928
Cactin	GCCGCAGCCGGAGTCGGAGT	458	0.00539253
Calr	TGAGCAGAATATCGACTGTG	537	0.00632269
Calr	TATGTTTGGATTCGACCCAG	407	0.00479206
Calr	CATGAGCAGAATATCGACTG	634	0.00746478
Calr	CAAGAATGTGCTGATCAACA	670	0.00788864
Calr	GCGGCCAGACAACACCTATG	949	0.0111736
Calr	TACATAGGTCCGGACATCTG	451	0.00531012
Calr	GATTCAAAATCCTGAATACA	366	0.00430932
Calr	CCCAACACTAACCTCAGGCT	1023	0.0120449
Calr	GGCGGACAGTGCGTAAAATC	728	0.00857154
Calr	GGGTCCTTTATCTTCTTGGG	261	0.00307304
Caprin1	AGTTTGCAAAGGAATTACAG	332	0.003909
Caprin1	GCAGAAACACAGTTCAGCAG	669	0.00787687
Caprin1	AAGTGAGGTTGAATCAACAG	393	0.00462722
Caprin1	GCGTAATCGACAAGAAACTT	400	0.00470964
Caprin1	GTGAGAACAGATCTGAAACA	466	0.00548673
Caprin1	CAAATCCCACAAGTGAATTG	526	0.00619317
Caprin1	TGCTGTATACCCCTCACTTG	746	0.00878347
Caprin1	TCATCAAAATGGGTTGTGTG	489	0.00575753
Caprin1	GAGCCACTGGAGTCAAAGAG	455	0.00535721
Caprin1	TATGAACCCTACCCAGAACA	723	0.00851267
Caprin2	TGTACAAAAAGACTTCAAAG	359	0.0042269
Caprin2	GGAAGGTAGTGAAAAAACAG	368	0.00433287
Caprin2	ACCAGAGATACAGCCACAAG	691	0.0081359
Caprin2	GCAGCTTAACCCAGACCAGT	592	0.00697026
Caprin2	GAAAGCCCTAAGTCCAAAGT	538	0.00633446
Caprin2	CAAATGGCCAAGTCCTGACG	834	0.00981959
Caprin2	AACTGGAAGCTCTTTGACAG	595	0.00700559
Caprin2	GCTACAAGTAACCGGAGAAG	674	0.00793574
Caprin2	CTGTTCTCTGCACACAGGGG	573	0.00674656
Caprin2	GGAGAAGAAGAAAGAGTCCT	405	0.00476851
Card11	GCAGCATAACTGTGTTCATG	746	0.00878347
Card11	AGGAAGATGCGCCACACCGG	674	0.00793574
Card11	TTTAGGTTCATCCGGCGCCG	778	0.00916024
Card11	GTTGGACATTCTTCACACCA	800	0.00941927
Card11	GCGACCTCCAACTCGAGGTG	1022	0.0120331
Card11	GGATGCGTGCACAAAAGAAG	511	0.00601656
Card11	TGACCCCCAGATGTGACCGA	516	0.00607543
Card11	GCAGCTGAGCCTGATACGGG	593	0.00698204
Card11	TCAACCTGGAAAGCAAGCTC	588	0.00692317
Card11	AGATGGCCTTGTCTGAGTCA	642	0.00755897
Carhsp1	GTCAGGACCACCATCAGCTG	997	0.0117388
Carhsp1	TTCATCACCCCAGCTGATGG	727	0.00855977
Carhsp1	ATTTCCCTCTCAGGACAGTG	1090	0.0128338
Carhsp1	ATTGGATACCCCTCGCACCC	766	0.00901896
Carhsp1	CCCTACAGAAGTCTGATGCG	534	0.00628737
Carhsp1	TAACTCACTCAGAGATGTGC	888	0.0104554
Carhsp1	TACAGACTCCTTTGTAGACG	625	0.00735881
Carhsp1	GACCACATTGCCCCGCAGGG	723	0.00851267
Carhsp1	GAGTCTGTAAATGCTTCTGC	485	0.00571044
Carhsp1	CTAGCCCTCTGCCTACCCGC	905	0.0106556
Casc3	CTGTTAATAAATGTCCTAGG	347	0.00408561
Casc3	ATGAAGCTAGTTACCGGTCA	857	0.0100904
Casc3	AAGGACCAGGACCAAAGTTG	597	0.00702913
Casc3	TTGGTTTGGTCCAGACCCAA	410	0.00482738
Casc3	TCTTCGAGGACAGACTCAGG	535	0.00629914
Casc3	CCAGTAGACTCTACCACAGG	678	0.00798284
Casc3	AAAGCCTGAGTCTAAAGGCA	499	0.00587527
Casc3	CGAGGTTTCCGGATTCTTCG	359	0.0042269
Casc3	TCGCTGCCTTCTCAGCGCGG	194	0.00228417
Casc3	ATCTTCTGCACTTTCATAAT	498	0.0058635
Casp3	CATGCAGAAAGACCATACAT	688	0.00810058
Casp3	AACCTCAGAGAGACATTCAT	392	0.00461544
Casp3	CACAGTCCAGCTCCGTACCC	1127	0.0132694
Casp3	TCGGCTTTCCAGTCAGACTC	635	0.00747655
Casp3	AGAGCGAGATGACATTCCTT	564	0.00664059
Casp3	AAAATGGATTATCCTGAAAT	236	0.00277869
Casp3	GTGTGTGTGATTCTAAGCCA	407	0.00479206
Casp3	TCTTACTCGTGAAGACATTT	392	0.00461544
Casp3	CAGTGGGACTGATGAGGAGA	464	0.00546318
Casp3	GTGGCATTGAGACAGACAGT	606	0.0071351
Casp8	CTTCCTAGACTGCAACCGAG	850	0.010008
Casp8	ATGATCAGACAGTATCCCCG	638	0.00751187
Casp8	AGGTCAACAAGAGCCTGCTG	670	0.00788864
Casp8	CTACATCCCACACAAGAAGC	499	0.00587527
Casp8	GAATTACCATCCAAAACTGA	491	0.00578108
Casp8	GGTAGCCTTCTAGAATCTCG	560	0.00659349
Casp8	TGAGATCCCCAAATGTAAGC	408	0.00480383
Casp8	AAAGGAACAGACTGTGATAA	491	0.00578108
Casp8	GCAGGTCCCACCGACTGATG	1147	0.0135049
Casp8	CAACAATCATGATTTCAGCA	568	0.00668768
Cat	AACTTAATATCATGACCGCG	429	0.00505109
Cat	TGGCATTGAAAAGATCTCGG	386	0.0045448
Cat	GGAGTATCTGGTGATATCGT	331	0.00389722
Cat	ATAAGAGGGTAGTCCTTGTG	447	0.00526302
Cat	AGTGACCGAGGGATTCCCGA	668	0.00786509
Cat	ATTTCACTGCAAACCCCCGA	638	0.00751187
Cat	GGGCTGGGCTCGATGCCAGG	554	0.00652285
Cat	AGACAACGAGTACCTTGTAA	510	0.00600479
Cat	TTCTGGCTATGGATAAAGGA	288	0.00339094
Cat	TTCACTGTGCAGACCGACCA	1230	0.0144821
Ccar1	TGTACCGTGGAACGACACGA	939	0.0110559
Ccar1	TGAACACCAAACGTTGTCTG	763	0.00898363
Ccar1	TCAAGCTTAGACCAATGGGT	574	0.00675833
Ccar1	TGTGTTAAAATGGTCTGCTG	489	0.00575753
Ccar1	TGTCACAGCCACAACCTGCG	1257	0.0148
Ccar1	GCGTACAGTTCCAGCTCATG	821	0.00966653
Ccar1	TACAAACCTTTGCACTGTAC	763	0.00898363
Ccar1	TTCGGATGCACAATTATGGC	665	0.00782977
Ccar1	ACAAAGCTACATGATACATT	519	0.00611075
Ccar1	CATCCAGCGAAGGAGACCAG	695	0.00818299
Ccar2	GCCAGCTCAAGTGAACGGAA	400	0.00470964
Ccar2	ACTCGAAGAAACGCAAACAG	753	0.00886589
Ccar2	AGAGACAGGTTGACACAGCG	665	0.00782977
Ccar2	AGTGTCCACATCTTGCTGTG	875	0.0103023
Ccar2	GTGAAGGCCGCATACAACCC	650	0.00765316
Ccar2	CCGGCAGTTACACACAGTAG	679	0.00799461
Ccar2	TGAGGCTGAAAGATCAGCTG	589	0.00693494
Ccar2	TGGATGACATGGCTGAGCCA	480	0.00565156
Ccar2	AGAGCACCCAACATACCTGA	926	0.0109028
Ccar2	CAAAGAAGATGCGGTCAAAG	654	0.00770026
Ccdc124	GGACAAACACGTGATGCGGA	642	0.00755897
Ccdc124	GGTCACACGTGCACAGATCG	1077	0.0126807
Ccdc124	GAGGAAGACTCACGGCTCAA	645	0.00759429
Ccdc124	AGGCGGCAAGGCCCCACGTG	791	0.00931331
Ccdc124	CGGCAGCTGCCCGAGCACGG	634	0.00746478
Ccdc124	CAGCGTGGAGGCGCGCACTG	937	0.0110323
Ccdc124	CGGTTAAGGTTCTCTTCCAG	517	0.00608721
Ccdc124	CGCTGATGCCAAGAAACAGA	480	0.00565156
Ccdc124	GGAGCAGCTGGAGCGCAAGA	508	0.00598124
Ccdc124	AGAGAGCAGCGGGCAGAGCC	515	0.00606366
Ccdc137	GGTGGCTTTCAAGAAGACGT	495	0.00582818
Ccdc137	AGAAATTATGAGGAGCCGAC	488	0.00574576
Ccdc137	GCTAAGAAACAGCACGTGCT	623	0.00733526
Ccdc137	CCTGCGCTGTCCGGGCAGTG	535	0.00629914
Ccdc137	GAATTGCAAGCCTAAGAACC	446	0.00525125
Ccdc137	GTCGTCGCTTCTGGAACCTG	742	0.00873638
Ccdc137	CTGTCCCGAGCCTCTAAGAC	705	0.00830074
Ccdc137	CTCCTGCTCCAATCTGTCCA	740	0.00871283
Ccdc137	CAAGTTCAAGCAAAGGAAGG	554	0.00652285
Ccdc137	TTGGGAGCTGCCTGCACCTC	961	0.0113149
Ccdc59	AAAATTACAAGAAATTGCTG	403	0.00474496
Ccdc59	AATCCTTCAATGTTAGGACA	625	0.00735881
Ccdc59	TTCCGGGGGAGCGTGCGCAA	506	0.00595769
Ccdc59	TGGGTAACGATCTGTGAACT	574	0.00675833
Ccdc59	TCAGATTCGGAAACCAGAAT	389	0.00458012
Ccdc59	CAGCCAGAAGAGCTGAACAC	880	0.0103612
Ccdc59	TGTCAGAAGAACAGGTTGAC	708	0.00833606
Ccdc59	ACACCTCTATCTGGCCGAAG	551	0.00648753
Ccdc59	CCCACGCGCCGCAAACCCTC	1554	0.0182969
Ccdc59	ACCACCTGGCGGTTCTTCAG	295	0.00347336
Ccdc9	GAATATCGAGAAGATGAATG	446	0.00525125
Ccdc9	GATAACACTCACCATAGCGG	853	0.0100433
Ccdc9	AGGGGCCCACCCCGACGTCG	635	0.00747655
Ccdc9	GGCTCTTCGTCGGAAGAATG	435	0.00512173
Ccdc9	GACATGACGATGTCCATGAC	1014	0.0119389
Ccdc9	TCCTGCCCCTAAGAGATGAG	764	0.00899541
Ccdc9	CTGAAGTCAGCAGCCGCAGA	750	0.00883057
Ccdc9	TGGGACTCCTCGACCCCCAG	724	0.00852444
Ccdc9	AGCGACACCGCAAGCCCACC	1358	0.0159892
Ccdc9	TCCATGGAGCGGCTCTTCCG	866	0.0101964
Cdc40	CCTGATGATTATCTAACGAA	292	0.00343804
Cdc40	ACCTGTCGTAGGCCGCACTG	937	0.0110323
Cdc40	GAGTTTAAGGTACCTGTCGT	510	0.00600479
Cdc40	AGAAGGACATTTGCTACGTA	690	0.00812412
Cdc40	AAATGTATGACTATCAAGGC	439	0.00516883
Cdc40	CAAGCTCTCTCTGACCGTGG	684	0.00805348
Cdc40	CCAAAAAACAAATTCACGTG	476	0.00560447
Cdc40	AGGAGCGAACATGGTCTCAT	569	0.00669946
Cdc40	GGGACCATGGGCAAAATATG	353	0.00415625
Cdc40	CTCCATAAACTTCCCATAGC	808	0.00951347
Cdc5l	AATCATTCTTAGGTGCGGGG	431	0.00507463
Cdc5l	CCGGCCTGACCCGATAGACA	831	0.00978427
Cdc5l	ATGCAGATTTCAGGAAACTG	371	0.00436819
Cdc5l	TGAACTTGAGATGCTCTCCG	556	0.0065464
Cdc5l	CAAGGGACAAAACTGCCCAA	683	0.00804171
Cdc5l	ACAGATGCTCCGAGTACCTG	889	0.0104672
Cdc5l	TTGCCTTTAATAGGTACGAA	233	0.00274336
Cdc5l	TCTTGAGAGGCTGGTGTCCG	588	0.00692317
Cdc5l	TTGTATAGGACTCCTTCTAA	313	0.00368529
Cdc5l	ACTCATAGTGTTCCAAGCAC	586	0.00689962
Cdk11b	TGCACATCACCGTACCATGA	901	0.0106085
Cdk11b	GAGAACATTCCAGAAGAGAG	536	0.00631091
Cdk11b	ACATCGTAGCCATTCAGCAG	698	0.00821832
Cdk11b	CTACATTGTGATGAACTACG	375	0.00441528
Cdk11b	GGTCCTTACCAACCAAGATG	479	0.00563979
Cdk11b	TGCTCTGTAGACCACCCCAT	564	0.00664059
Cdk11b	GGAGCTGAGAGATCACCGAA	487	0.00573398
Cdk11b	GAGCACCAGTGAAGAATCAG	621	0.00731171
Cdk11b	GGTGACAGTGCTGGAGAGTC	583	0.0068643
Cdk11b	CGCTGTCACTGATGTCTTGG	614	0.00722929
Cdk13	CACAGTTACATAGCAAACGA	498	0.0058635
Cdk13	GCAGCAGTCCTTATTCCCGG	712	0.00838315
Cdk13	ATAAGTCGAGTGCAGCTGCG	812	0.00956056
Cdk13	ACGTAGCCGACGCGCTCTTG	917	0.0107968
Cdk13	CTCACAGACAAACCATGTGA	605	0.00712333
Cdk13	TATATGGACCATGATCTGAT	598	0.00704091
Cdk13	GTGAGCTCCCAGTCCGAGCA	762	0.00897186
Cdk13	CTAACAAGGTCATTACTTTG	521	0.0061343
Cdk13	AAGCCACTCACACCAAGCAC	1111	0.013081
Cdk13	CGGGCTGAAGCAAGAGGAGG	541	0.00636978
Cdkn1a	CCACGGGACCGAAGAGACAA	582	0.00685252
Cdkn1a	TGCTCCTGTGCGGAACAGGT	662	0.00779445
Cdkn1a	GTGGAACTTTGACTTCGTCA	389	0.00458012
Cdkn1a	CGCAGCCGTGACGACCTGGG	1034	0.0121744
Cdkn1a	GGGAGCGCGTTCGGAGCCTA	655	0.00771203
Cdkn1a	GATTGCGATGCGCTCATGGC	794	0.00934863
Cdkn1a	CGGAGCTGGCCCCTGCAGCA	621	0.00731171
Cdkn1a	CCAAGGTCTACCTGAGCCCT	636	0.00748832
Cdkn1a	CGGCACACTTTGCTCCTGTG	832	0.00979605
Cdkn1a	CAGACGAAGTTGCCCTCCAG	1002	0.0117976
Cdkn1b	CAATTAAAGGCACCGCCTGG	406	0.00478028
Cdkn1b	AAGAAGCGAGTCAGCGCAAG	850	0.010008
Cdkn1b	GCGGATGGACGCCAGACAAG	951	0.0111972
Cdkn1b	CAATCATGAAGAACTAACCC	738	0.00868928
Cdkn1b	GGGCAGATACGAGTGGCAGG	564	0.00664059
Cdkn1b	GCTTGCCCGAGTTCTACTAC	683	0.00804171
Cdkn1b	CCCCCCCAAGAGCGCCTGCA	776	0.0091367
Cdkn1b	CTCAGGCAAACTCTGAGGAC	513	0.00604011
Cdkn1b	CGGGCCGAAGAGATTTCTGC	535	0.00629914
Cdkn1b	CACTCGTATCTGCCCTCCAG	1072	0.0126218
Cdv3	TCTGGTGCTAGGTCCGGAGA	494	0.0058164
Cdv3	TCTATTAGTTACAGAAACCC	302	0.00355578
Cdv3	TCAGGCAATGCAAATAAGGT	452	0.00532189
Cdv3	TCACCTGTTACTGGAGCAGG	603	0.00709978
Cdv3	AGGAGGCGCTTGTACCGGAG	439	0.00516883
Cdv3	GCAAGGCCATAACGAAGGTG	767	0.00903073
Cdv3	GGTGCCAGGTCGGGCGACGG	640	0.00753542
Cdv3	GAAGGAACGGAGCAGTCGCG	939	0.0110559
Cdv3	GGAGATAATTGGGAAGAAGG	315	0.00370884
Cdv3	GCTCCCGCCATCGCCCGGCC	908	0.0106909
Cebpz	CCTTGGTAACCACTAAAACG	452	0.00532189
Cebpz	AACGCTCCACAAATGAATGG	777	0.00914847
Cebpz	AATCATGACTTAAAGTCTCG	429	0.00505109
Cebpz	ACCATTGACGACCTTCAACA	1106	0.0130221
Cebpz	TGGAGGCAAGTGGTACGACA	739	0.00870105
Cebpz	TGAAGGCCATCGTGTCATCA	897	0.0105614
Cebpz	CAAGTTGTCAAAGTGCACCC	653	0.00768848
Cebpz	CAGACCTTCTGCCAGACAGT	889	0.0104672
Cebpz	GCATACCCTTACTCCCAGAT	969	0.0114091
Cebpz	CGGAAGCATCCCAATATGAA	434	0.00510996
Celf1	GAAGAGTGCCGGATATTGCG	563	0.00662881
Celf1	AATGCACCAAGCACAAACCA	929	0.0109381
Celf1	GTGAGAGCATTGGTACCACT	640	0.00753542
Celf1	TGTTTGCAGGGCTCCAAGTG	468	0.00551028
Celf1	GAACTCACTGCTAAGTACTG	854	0.0100551
Celf1	AGCACTTACCTCCCATTGGG	860	0.0101257
Celf1	GAATGCTCTCCATAACATGA	586	0.00689962
Celf1	AAATCAACATCCTAAGGGAT	606	0.0071351
Celf1	GAAGACAGGAAGCTCTTTAT	367	0.00432109
Celf1	CATCTGCTGCTGGAGCTGCT	838	0.00986669
Celf2	ACTTACCGCCAGGTACTGCG	734	0.00864218
Celf2	ATAGTGAAAAGTCAAACGGT	365	0.00429754
Celf2	TCCTTGTAGAGTCCCAAGAG	404	0.00475673
Celf2	CATGCATCAGTCTCAGACCA	1084	0.0127631
Celf2	ACAGATCCCTAGGTCCTGGT	704	0.00828896
Celf2	GGACCTGATGGGCTGAGTCG	620	0.00729994
Celf2	GTTACAGAATCTGGCAACAC	734	0.00864218
Celf2	TTTGTACCTTTACTCTGGGG	680	0.00800638
Celf2	TCTAGCACAAGCAGTGCCCT	934	0.010997
Celf2	GCTGTGCAAGCTGCTGCTGG	749	0.0088188
Celf3	ACCTCCTCGACTCTCGCTGT	939	0.0110559
Celf3	GTGAGTCTGGAACTTCACAA	538	0.00633446
Celf3	TGTCAGCAAACTTTACCACC	781	0.00919557
Celf3	GAAGTTCCAGACTCACGCTG	880	0.0103612
Celf3	GGATGCTCTGTATCCCAACG	520	0.00612253
Celf3	TACCTGAGGATGGAGTGATG	849	0.00999621
Celf3	GGTGGCCATAGGGCTGAGGT	550	0.00647575
Celf3	GCTGTAGGCTCCAAACTGGA	553	0.00651107
Celf3	AAGTACACCGGGCTGCACAA	641	0.00754719
Celf3	CAAATGGTTCAAACATCTTC	431	0.00507463
Celf4	ATGGCATCGGTCGCGCAAGG	759	0.00893654
Celf4	ATGGGAGGAGTACTTCACAA	439	0.00516883
Celf4	GCCATGTAGAGCGTTGATGG	601	0.00707623
Celf4	AGGTTCACAGGCATGCACAA	629	0.0074059
Celf4	AGTGGGCCCTCACGTGAAGG	938	0.0110441
Celf4	ACGGATTAAGCCACAGCCCG	643	0.00757074
Celf4	ACAAGGAGCGCACAATGCGA	1058	0.012457
Celf4	TGAGGTTGGGGTCATAGGTG	403	0.00474496
Celf4	CGAGCAGAAGACCCTGCCCG	687	0.0080888
Celf4	TGGGCAGATCCCCCGAAACC	464	0.00546318
Celf5	TTGCCGACACGGATAAAGAG	583	0.0068643
Celf5	GTGGGAAGAAAACTTCACGA	459	0.00540431
Celf5	GGAGGTTACTACTACCTCCA	512	0.00602834
Celf5	GTGCCCACCTTTGTGCACGC	1058	0.012457
Celf5	AGGCAGACCGTTAAGGCTGA	578	0.00680543
Celf5	TAGGCACTGTAGGGGCTGAA	436	0.0051335
Celf5	CACTCGTCTATGACGCCAAA	564	0.00664059
Celf5	GGGGCTCAGGTAGCTGCCAG	445	0.00523947
Celf5	ACTGCTCGAACAGCGGCTTG	518	0.00609898
Celf5	CAGGGTCTTCTGCTCGTGCA	684	0.00805348
Celf6	TTCGTGGGGCAGATCCCGCG	625	0.00735881
Celf6	CACTCCTCGATATGGCCGAA	803	0.0094546
Celf6	ACAGCCAATACATCCCCTGG	797	0.00938395
Celf6	CTGTGGCGCCTATACCACTG	869	0.0102317
Celf6	CCAGCCCTTCGGCCATATCG	806	0.00948992
Celf6	ACACGGTAGCCGGACAATGA	498	0.0058635
Celf6	GTGCTGAAGGACCGGCTCAC	1305	0.0153652
Celf6	GTGAAGCCGGCTGCCAGTGA	696	0.00819477
Celf6	CGCCACGTGCTGCATCTGGG	746	0.00878347
Celf6	TTCAGCACCGCGGACAGCGG	909	0.0107027
Cflar	ATGATCAAGCAGATTCCTAG	728	0.00857154
Cflar	TGGGTTATGTCATGTGACTT	376	0.00442706
Cflar	CTTACCTATAATCAGAAACC	396	0.00466254
Cflar	CCAAAATTACTTACTGGACT	489	0.00575753
Cflar	AAGACAACTCACCTTGTCCT	822	0.0096783
Cflar	ATGGCTTACTTTGACTGTCA	554	0.00652285
Cflar	CCTGGCTGCACCTAACGTCA	681	0.00801816
Cflar	CTGAATTGCTCTACAGAGTG	399	0.00469786
Cflar	TGACAGCTTTGCATGTGTTC	512	0.00602834
Cflar	AAGCTGGATATGATAGCCCA	412	0.00485093
Cherp	GATGAGCTCGTCCATTGATG	861	0.0101375
Cherp	CGTCATTGATCAGATAGATG	476	0.00560447
Cherp	GGCCGCTCAAAAGGGTGACG	700	0.00824187
Cherp	CATCAATGAGTACTCGTCAG	791	0.00931331
Cherp	ATGGCGCACACTTCGAGCTG	1076	0.0126689
Cherp	CCCTGGAACAACAGCCACGA	755	0.00888944
Cherp	AGGGAACCTCATACCTGGCT	548	0.0064522
Cherp	TTTGTGCAGGTGTCAATGAT	617	0.00726462
Cherp	CGCCCTGGGGTGGTGCCCAG	499	0.00587527
Cherp	AAGTTCTCGTTTCTGTTTGG	431	0.00507463
Chmp4b	CTGGAACTCGATGGTTGACA	505	0.00594592
Chmp4b	TGTCAACCATCGAGTTCCAG	757	0.00891299
Chmp4b	CACGGCACCAAAAATAAACG	540	0.00635801
Chmp4b	CAGCACATACATGTTGTCGT	817	0.00961943
Chmp4b	GCAGCACATACATGTTGTCG	885	0.0104201
Chmp4b	ACGGAGGTGCTCAAGAACAT	462	0.00543963
Chmp4b	GAACGCCAACACCAACACGG	1390	0.016366
Chmp4b	GGGCGGCCCGACCCCCCAGG	593	0.00698204
Chmp4b	TGACCAGCAAGAACTTGCAG	614	0.00722929
Chmp4b	CCTGGAGAAGAAAATCGAAC	453	0.00533366
Chtop	ATGTCTCTAAATGAGCGGTG	369	0.00434464
Chtop	GTAAGAGTAATATCCAGGCA	390	0.0045919
Chtop	TGCCCCGAGGAGGACTACGT	2	2.35482e-05
Chtop	CGAATGGGCTTAAGAAGAGG	332	0.003909
Chtop	GCCCCGAGGAGGACTACGTG	3	3.53223e-05
Chtop	GGAGAATAGACCCTCTGTCC	433	0.00509818
Chtop	ATCGAAGCCCGAATATTCAC	566	0.00666414
Chtop	CGGCTCGTCCACCTCGGAGC	839	0.00987846
Chtop	GCCCTGGCCAGGGGAGCAAT	574	0.00675833
Chtop	CAGTCTTCTGTTTCTGGCAC	539	0.00634624
Cir1	GGCGCTCCGAGAGAAAAGTG	455	0.00535721
Cir1	TGCCTACCTGAGCCATCAGT	667	0.00785332
Cir1	TTCCTACTGATGGCTCAGGT	750	0.00883057
Cir1	ACAGTCTCCTCAGCTACCTG	1211	0.0142584
Cir1	GTACCTTTCTTAACTCCTGG	596	0.00701736
Cir1	GCTGCTATCTGATGTCTCCG	947	0.0111501
Cir1	TTCACTAATATAGGTATGGA	296	0.00348513
Cir1	GACCGCAAATGATCCATCAC	935	0.0110088
Cir1	TGTATTAAATGTCACAAGTG	345	0.00406206
Cir1	GCAACAGTACCTTAAAGAGC	762	0.00897186
Cirbp	AACCGGTCCCGAGGATACCG	616	0.00725284
Cirbp	AAGTATGGGCAGATCTCCGA	657	0.00773558
Cirbp	CGGTCCCGAGGATACCGGGG	442	0.00520415
Cirbp	TGAAAATATCGATGACGCTA	519	0.00611075
Cirbp	AGGGAGACCCAGCGATCCCG	521	0.0061343
Cirbp	GTCCCCCACGGAAAAAGCCC	450	0.00529834
Cirbp	CTCTGGAGAACCCTCGGCCC	888	0.0104554
Cirbp	CATGATGGCTATGAATGGGA	381	0.00448593
Cirbp	GCGGCAGATCAGAGTTGACC	730	0.00859509
Cirbp	CAGCTTCGACACCAACGAGC	1221	0.0143762
Cisd1	GGGCGGCTCACCTCGCACAG	688	0.00810058
Cisd1	TCTTGCAGTTGAGTGGATCG	546	0.00642865
Cisd1	GGTGCATGCCTTCGACATGG	959	0.0112914
Cisd1	GATCCAGAAAGACAACCCGA	630	0.00741768
Cisd1	AGAGAATCGCACCAAAGCTA	577	0.00679365
Cisd1	CTTCGACATGGAGGATCTGG	836	0.00984314
Cisd1	AGCTCCAACTCCGCTGTGCG	856	0.0100786
Cisd1	GTAAGCCAGGTAACCGAGAG	619	0.00728816
Cisd1	CCTCCAGCATCGGCAGTACA	1023	0.0120449
Cisd1	GCGGCCGTCACCTTTGCTGC	1219	0.0143526
Ckap4	TCTGTCGGACGGGATCCACG	1103	0.0129868
Ckap4	AGAGGACATCCGGAGACTGG	629	0.0074059
Ckap4	CCGCAGAACCAGGCGCACCG	1125	0.0132459
Ckap4	GTCGGACTCCATCGTCTGAA	778	0.00916024
Ckap4	CCGCACCTCTGTGTAGACGT	708	0.00833606
Ckap4	GTCCCTGGAGAACACAGTCG	829	0.00976072
Ckap4	AGTCCCAAATGTGGCTTGCA	532	0.00626382
Ckap4	GAGCCAGAAGGAGATCAATG	648	0.00762961
Ckap4	CAGAGCCAGGCGCTCTGAGT	576	0.00678188
Ckap4	ATGGACATACCAGCCCGAGA	559	0.00658172
Clasp2	GCGCTCCATCCAACAAACGT	886	0.0104318
Clasp2	CCTAAACACAGGCTCCGATG	833	0.00980782
Clasp2	TGTCGTACCTAGTGATGCAT	614	0.00722929
Clasp2	GTGCTGAAGCTGAATTGACC	629	0.0074059
Clasp2	CAAAAGCTCTGATGTTCGGA	359	0.0042269
Clasp2	TAAAAAACCAGAGAACGCTA	454	0.00534544
Clasp2	ACAGGTCCTTCTAAAGAAGG	375	0.00441528
Clasp2	AAGGAATAAGTCTAGGTACA	411	0.00483915
Clasp2	ACATTACCTTGTAATATCAA	343	0.00403851
Clasp2	GATGAGGACCTGTCTGACTG	753	0.00886589
Clasrp	GATGTGCACGAACATCAAAG	574	0.00675833
Clasrp	AGCGGAAATGTAACTACGAG	517	0.00608721
Clasrp	GATGAGGTCATCCCCGACAT	963	0.0113385
Clasrp	GTCTCCATCAGCCATGCCGT	1176	0.0138463
Clasrp	TACATTGATGAGCTGTACGG	687	0.0080888
Clasrp	GGCCAGAGCGGTAATAGCCA	475	0.00559269
Clasrp	CTGACACTTACCGCTTATAG	777	0.00914847
Clasrp	AGAAAGCCATGTACTCGGTG	623	0.00733526
Clasrp	GGAGCGGGGCCACCCGTTTG	517	0.00608721
Clasrp	GCACCTGCAGGAACTGAGCG	649	0.00764139
Clk1	TTCGCAGCACCATTCACACG	9	0.000105967
Clk1	ATACTTACAAAGTACTATGG	434	0.00510996
Clk1	ACTACATGGGCTACGAGCCA	725	0.00853622
Clk1	CTTCGCAGCACCATTCACAC	1205	0.0141878
Clk1	GCAGTTACAAAAGTAAACAC	480	0.00565156
Clk1	CTGATATGATCCATTCGAAA	427	0.00502754
Clk1	GTGTCCAGAAGAGTCACCGA	775	0.00912492
Clk1	AGGTGCTTTCGGAAAAGTGG	418	0.00492157
Clk1	ATCACTCCAAAACGACAGAC	789	0.00928976
Clk1	TGTGAAGTCTGACTACACAG	723	0.00851267
Clk2	ATGACCATTCGTCCGATCGG	1175	0.0138346
Clk2	ATCGGCGGCTGTACGATCGG	513	0.00604011
Clk2	AGTGTAGAGGACGACGCTGA	773	0.00910137
Clk2	GTGTCAACTTGTTATCATGG	715	0.00841848
Clk2	GGTCCACACACTGCACAACT	971	0.0114326
Clk2	ACTCACCTACAACCTAGAGA	624	0.00734703
Clk2	TGAGGAAATCGAAGGTGCTA	368	0.00433287
Clk2	CCTGGTCAAGTAGCAGTGAC	527	0.00620495
Clk2	GCAGCCGAAGGAAACACAGA	548	0.0064522
Clk2	CCAGCACGTTGATTTCTAGT	569	0.00669946
Clk3	GGTCTTCACGTTCTCGACAT	1058	0.012457
Clk3	ATGATCGTATACCCTACCAG	598	0.00704091
Clk3	TAGGCCATGTGCCGGACATG	871	0.0102552
Clk3	CGCCGATCCGGCACACCAGG	787	0.00926621
Clk3	ACCGTGGTCGCGCACCGATG	1119	0.0131752
Clk3	GACGGCTGCGTCACGCGAGG	962	0.0113267
Clk3	AGTCAGACATCAGGACACAA	556	0.0065464
Clk3	CCTCTATAGAGGGAAGTCAC	593	0.00698204
Clk3	ACCCATACCTGAGCTACCGC	844	0.00993733
Clk3	CGATGTCGCCCGGACCCTGG	689	0.00811235
Clk4	TGCGACTGATGACTTGCACA	623	0.00733526
Clk4	TCATAATAAATTAACACACA	420	0.00494512
Clk4	AAATGTAGGCCGTTACCGGG	530	0.00624027
Clk4	CCTTACTTTAGATGAAATCG	493	0.00580463
Clk4	GTTGTAGAGTGCATTGATCA	457	0.00538076
Clk4	ACTCTAGCATCTGGACGCAT	620	0.00729994
Clk4	ATGAGAGAGATTATCGGGAC	462	0.00543963
Clk4	GTACTTACAAGACACTGTTG	622	0.00732349
Clk4	GAAGTCACAAACGCAAGAGA	538	0.00633446
Clk4	CTGATGTGATCAATTTGAAA	274	0.0032261
Clp1	GAGTAGCAGTCGACACACAG	918	0.0108086
Clp1	ACTCCACGTAAGTAGGACGG	745	0.0087717
Clp1	ACTTACGTGGAGTTAGATGT	460	0.00541608
Clp1	GAGCCAAAATGATACACAAG	532	0.00626382
Clp1	GGCCGACGCTGCGTGCACCA	1130	0.0133047
Clp1	CTCCAACTGAACCGATTGAG	738	0.00868928
Clp1	AACACAGTTCGAACAAAATG	799	0.0094075
Clp1	CCAAGGCTGTATGAGTGTTG	600	0.00706446
Clp1	CCAAGTGAAAACAGCCACCT	607	0.00714687
Clp1	AAAGGTGTGAAGTGAACAGA	422	0.00496867
Cmss1	CAAAATCAGAGCCCAAACCA	613	0.00721752
Cmss1	CTTCTAATTCTATCACGGAA	311	0.00366174
Cmss1	AACAAAGGAACCCAAAGCAG	512	0.00602834
Cmss1	AACCCACAACGAGAAGAAGT	780	0.00918379
Cmss1	GCCCAAACCAGGGACCCCTG	636	0.00748832
Cmss1	GAGTCAAATCATTGGCCTTG	481	0.00566334
Cmss1	GGTTCCTGAGAAAACCCAAC	545	0.00641688
Cmss1	TTCTGACCTGATGAGCTCCA	690	0.00812412
Cmss1	CCCCTTTCAGAGCAATCAGG	528	0.00621672
Cmss1	TGCAAATAATTTCATAACTT	193	0.0022724
Cmtr1	AGATGAAACAGAGTTCTGTG	580	0.00682897
Cmtr1	ACATGATACGCTCTAATGAG	741	0.0087246
Cmtr1	GCAGGCCTGCCAATTCAGAG	552	0.0064993
Cmtr1	AATCCCTATGAGATGATCCG	832	0.00979605
Cmtr1	GGACGATGTTCCCTCCACAA	732	0.00861864
Cmtr1	TCCAATCAGAAAGGTCGACG	763	0.00898363
Cmtr1	GGGCTCGAAGAGCTCGCTGG	305	0.0035911
Cmtr1	GGACAACAGACAGGGCCATG	798	0.00939573
Cmtr1	TCGTATGTTCACAAATCCCC	613	0.00721752
Cmtr1	AGGAAGGAGCAACTCGAGCC	608	0.00715865
Cmtr2	GTAAGCCACTCGATAATGAG	619	0.00728816
Cmtr2	CAGCCTGAATCCATACCACG	688	0.00810058
Cmtr2	AACTGCCACTCATTATCGAG	759	0.00893654
Cmtr2	AACACCATCCTAGATAGCAG	824	0.00970185
Cmtr2	GATGGCAGCTTCGATTGCCA	647	0.00761784
Cmtr2	CCAGTCTTGAGTACCAGTCG	597	0.00702913
Cmtr2	TGTCAAAAAGGCCGTGAACG	529	0.0062285
Cmtr2	AACAATTTAGCAGGTACATG	496	0.00583995
Cmtr2	AGAGAGACTCAATAATCTAA	322	0.00379126
Cmtr2	AGATGATGGAAACCCTTTCA	421	0.00495689
Cnbp	GACAAAAATACCTCTATCCG	524	0.00616962
Cnbp	GTTGAAGCCTGCTATAACTG	515	0.00606366
Cnbp	AGGTAAAACCACCTCTGCCG	541	0.00636978
Cnbp	GAGCAATGCTGCTACAATTG	730	0.00859509
Cnbp	TGAGTCTGGTCATCTTGCCA	514	0.00605188
Cnbp	AGCACTTCTGCTCATCCGCG	959	0.0112914
Cnbp	TGCTTCAAGTGTGGACGATC	551	0.00648753
Cnbp	GCCAGGGAGTGCCCTACTGG	569	0.00669946
Cnbp	CACAGCGGTAGCAGATGTCA	471	0.0055456
Cnbp	CCACATTGCCAAGGACTGCA	751	0.00884234
Cnn3	GACCCAGGTTCAGACGACGC	888	0.0104554
Cnn3	TCTGCGCAACTGGATAGAAG	671	0.00790042
Cnn3	TACCTGGGGCCAATTTAGTG	449	0.00528657
Cnn3	CTCCGCCGAAGTTAAGAACA	453	0.00533366
Cnn3	TTCCATACAACCATTGACAT	793	0.00933686
Cnn3	TTATGATCCCAAGATGCAGA	576	0.00678188
Cnn3	GCAGATGGGCACCAACAAAG	531	0.00625204
Cnn3	CAACAAATGTGCCAGCCAGG	733	0.00863041
Cnn3	GATGAAGGCAAATTAAAGGC	369	0.00434464
Cnn3	TTTGCTTCAAATATATCATG	287	0.00337916
Cnot1	GTAGGGTTTAGAGTAATATG	374	0.00440351
Cnot1	TTTCTTAAGACACTACGCAG	563	0.00662881
Cnot1	ATTGTCTCGAATACTTGACG	553	0.00651107
Cnot1	CAGCAAAGGACTTCACAATG	689	0.00811235
Cnot1	GCATTCCCTGATAAACCCAG	635	0.00747655
Cnot1	CAGACATGGTTGGATGTGGT	408	0.00480383
Cnot1	GGAATGGCATCTCTTAGTAT	311	0.00366174
Cnot1	TGCCGGTCAGGTTAACACAA	451	0.00531012
Cnot1	ATGCCCGGCAAGAAGGACGT	712	0.00838315
Cnot1	ACAGCAAGAGTTGCTCTATG	673	0.00792396
Cnot10	AAGGGGCAACTATCGAAAAG	629	0.0074059
Cnot10	GATGGCTGCAAACTCCACAC	803	0.0094546
Cnot10	GAAAGAGAGGACATACCGAA	528	0.00621672
Cnot10	AAAATGATTTCACAGGGTAG	418	0.00492157
Cnot10	ATTGACAGTACAAAGTCAGA	472	0.00555737
Cnot10	TTGGTCAGCAATGTACACAT	653	0.00768848
Cnot10	CCATCTCTTCAACAGCCGAG	730	0.00859509
Cnot10	ACAGGCAAGGTGTTGCAGAC	656	0.00772381
Cnot10	ACTTCTGAGCAAGAAACTAA	344	0.00405029
Cnot10	CCCCAAATTGTGCTTGCTCA	663	0.00780622
Cnot11	TCCATCAAGGCAATCTGGCG	784	0.00923089
Cnot11	GGATAAACTCTGGTCGAAAG	405	0.00476851
Cnot11	CAGATTGCCTTGATGGACGT	770	0.00906605
Cnot11	ATGTGTGTGAAGAATAGCAC	425	0.00500399
Cnot11	TGGCGGCGAGCGGCTCGGTG	727	0.00855977
Cnot11	CATCCTCAGTGACCCAGACC	732	0.00861864
Cnot11	ATCATCTCGGAGGAGGCGGG	509	0.00599301
Cnot11	CTGCGGGACGTACCTGAGAG	745	0.0087717
Cnot11	GAGGCAGCGGCGTTCCGGAG	631	0.00742945
Cnot11	GCATCACCAGCACCGAGCCC	1338	0.0157537
Cnot2	TAAGCTGCGATTTAACTGAG	1	1.17741e-05
Cnot2	GATAAGCTGCGATTTAACTG	373	0.00439174
Cnot2	TATTCCGGTCAGCTAACGCT	740	0.00871283
Cnot2	GGAATGTTAGTAACTCGACC	601	0.00707623
Cnot2	ATAAGCTGCGATTTAACTGA	580	0.00682897
Cnot2	GCTAGAATTTGAGTACATCG	345	0.00406206
Cnot2	ATGATGAACCACTCCCAGGT	565	0.00665236
Cnot2	ACAGTAAAAGGCTGTCGAGA	421	0.00495689
Cnot2	GATGTGGGAACATAGAAGAC	438	0.00515705
Cnot2	GTTGTGTATTGAGAAGTCTT	487	0.00573398
Cnot3	TGGTCTCCAGCATACGAACA	419	0.00493335
Cnot3	AGGCTCAGGGAATAACTCGG	331	0.00389722
Cnot3	CAAAACCAAAGCGTATAGCA	461	0.00542786
Cnot3	CCAGCTCCCAGCCACAACTC	1122	0.0132105
Cnot3	ATTCGTTCTCTTCAAAGTCG	730	0.00859509
Cnot3	CAGCCCAGCAAACTGCACTA	818	0.00963121
Cnot3	GAGGGACCAGATCAAGACAT	451	0.00531012
Cnot3	CACAACCGAACTATAGCCTG	737	0.00867751
Cnot3	ACTCCACTTCACTCTCAAAC	779	0.00917202
Cnot3	GTGCCGCCCACCTACCCCTC	1345	0.0158362
Cnot4	ACCCCAACCCTATACCAAGT	783	0.00921912
Cnot4	GTTACATAAGCACTGGCACT	735	0.00865396
Cnot4	CACCCCAACCCTATACCAAG	898	0.0105731
Cnot4	TCTTCATGAATTGGGAGATG	348	0.00409738
Cnot4	CACACACTACGACCGCCAAA	1069	0.0125865
Cnot4	AATCTGAAGGTTTGTCAATG	608	0.00715865
Cnot4	ACAGACCTACAACAAACACA	883	0.0103965
Cnot4	TGGTTCTTCTAAACAACCAG	383	0.00450948
Cnot4	ATGAACTGATGGGGATGACA	612	0.00720575
Cnot4	GAAAGTGGTTTGTAAACTGC	450	0.00529834
Cnot6	TCCCAATTAAGTGCCCATGA	471	0.0055456
Cnot6	TTAGTCCAAAGTCTCGAGCT	587	0.00691139
Cnot6	TGAATTTAATCAGCTAGCAA	294	0.00346158
Cnot6	CTGTGCAATATTCTTCAAGA	343	0.00403851
Cnot6	CAGAGTTTACCGGCAGAACT	487	0.00573398
Cnot6	ACAGAGGTTCAATATATCCT	356	0.00419158
Cnot6	ATAGCTGGAAAACCACATCT	432	0.00508641
Cnot6	TGTCTGAAGGAATACAGGAC	406	0.00478028
Cnot6	AACATGATCCAAGATCTTGG	772	0.0090896
Cnot6	TGGGCAGAGCTTGAAATAAG	314	0.00369707
Cnot6l	TATGTGATAAATATGCTACC	331	0.00389722
Cnot6l	GGAGCTTAAGTACATCACTC	641	0.00754719
Cnot6l	GCATACAGTGGAATTCAACC	581	0.00684075
Cnot6l	GTAATGACGAAAGATAACAT	579	0.0068172
Cnot6l	TATCAGGTGGAATGCGAGCA	596	0.00701736
Cnot6l	AGACAAACAGCTGCTTATAG	567	0.00667591
Cnot6l	GGATATTATGAGCTTATACC	379	0.00446238
Cnot6l	CTGCCAGCATTGAAGGATCG	702	0.00826541
Cnot6l	AACATGGTGTCTCTCAGGTG	511	0.00601656
Cnot6l	TTTAATGTAATCCATGGCCT	349	0.00410916
Cnot7	CTGACCTTTATGAATGAACA	421	0.00495689
Cnot7	TGACAGGAAAAAATAACCGA	276	0.00324965
Cnot7	CTACATTACACCGCAACAGT	735	0.00865396
Cnot7	CCAGTTTAAAAAACACGAGG	242	0.00284933
Cnot7	TATCCAGTTTAAAAAACACG	418	0.00492157
Cnot7	TTCCTCAGGCAAGTTAGAGT	615	0.00724107
Cnot7	AAAATATAATTATGTTGCTA	295	0.00347336
Cnot7	ACTTCTTATGACTTCAGGAG	513	0.00604011
Cnot7	CAGGGAGGACATGTATGCTC	525	0.0061814
Cnot7	TGAAGTTTGGGCTTGTAACC	388	0.00456835
Cnot8	ACCCGTCTGGAATCAACACA	765	0.00900718
Cnot8	TAGCGATATAGCTGTAGCTG	452	0.00532189
Cnot8	GCAGTTCCAGAAACACGAGG	507	0.00596947
Cnot8	GAGCTTCGAAATTCACCGAT	485	0.00571044
Cnot8	TCAGGTCATCTGTGAGGTGT	588	0.00692317
Cnot8	CTTCTTAAAATCATCCAGCT	310	0.00364997
Cnot8	TCAAGTGGCTTTCATTTCAC	559	0.00658172
Cnot8	GCTAACAGACTCTCGCCTGC	920	0.0108322
Cnot8	CAGAGAGGATATGTACTCCC	467	0.0054985
Cnot8	TGCAGAGCTGCTTATGACAT	489	0.00575753
Cnot9	CCAAATGAATGCCATAGCAT	620	0.00729994
Cnot9	AATGCCATAGCATGGGTGCA	571	0.00672301
Cnot9	AAAAGGGGTACAAAAAGAGT	334	0.00393255
Cnot9	CTAAACCAGTGTCATCCAAG	702	0.00826541
Cnot9	GCCTACTGCACTAGCCCAAG	799	0.0094075
Cnot9	GGTGAGCCGAAGATATTCAA	349	0.00410916
Cnot9	ACTGTCCAGTCCTGAGACAA	513	0.00604011
Cnot9	ACACAGAGGGATGATCTCTG	586	0.00689962
Cnot9	GGTGTGCTGTCAAGGTTGGG	609	0.00717042
Cnot9	TTTAGCATTGCTGCAGTGTG	542	0.00638156
Cnp	GGCGTACAAGCGTCTAGACG	717	0.00844202
Cnp	TAGCGTCTTGCACTCGTGGA	773	0.00910137
Cnp	TTGATGATACCAACCACGAG	728	0.00857154
Cnp	CAAATTCTGTGACTACGGGA	338	0.00397964
Cnp	ATCCTGGAGAAGTACCACGA	517	0.00608721
Cnp	TGGTGGAGCCCAAGACAGCG	628	0.00739413
Cnp	AGGAACCAGCCAAAGTAGAG	437	0.00514528
Cnp	AGCTGGCCAGGTCTTTCTGG	616	0.00725284
Cnp	TTCAGGAAAATGTCATCCTC	643	0.00757074
Cnp	TATTTCTGGAGATGAACCCA	542	0.00638156
Copa	CACCAGAAATATCCCAAACG	359	0.0042269
Copa	CTTGCGGTTACAGATCACAA	559	0.00658172
Copa	CTCTCTCTGACACATCACCT	920	0.0108322
Copa	CGTGGTGAAGCATGTGCTAG	488	0.00574576
Copa	GCAAGCGGCACCTACCGTCA	797	0.00938395
Copa	GGATCAATGGTTAGCACCCG	524	0.00616962
Copa	TGAGGATCAACTCTTGGCGA	454	0.00534544
Copa	CTCAATGTTTCCACACTCCA	784	0.00923089
Copa	CATGTTACCATGAACAGCAT	729	0.00858331
Copa	AGGCGATGATTATAAGATTA	259	0.00304949
Cpeb1	TGTACAACACCTATAAATCG	718	0.0084538
Cpeb1	CAGAGAGCCAAAAACACGGA	498	0.0058635
Cpeb1	AGCATGCTCCAAAATCCACT	512	0.00602834
Cpeb1	TCACCTTCTGTAATATCCCA	476	0.00560447
Cpeb1	CACTCAGAGAGCCAAAAACA	431	0.00507463
Cpeb1	GTCCCAGCCAGTCAGACTGA	732	0.00861864
Cpeb1	ATGGGGTTCTTATAGTTCCG	430	0.00506286
Cpeb1	GCTCCAAGAAGGTCCCAAGA	504	0.00593414
Cpeb1	CCACTCGTGTCTGAGTCAGA	606	0.0071351
Cpeb1	GATGGGCGTTGGGTCCCGAA	600	0.00706446
Cpeb2	GTAGAGCGAGTGAATTTCGG	453	0.00533366
Cpeb2	CTGTTCTGATGGTTGCTCCA	627	0.00738236
Cpeb2	GGGATGCGCCACGAGCGGGG	751	0.00884234
Cpeb2	TGAGGTAAATTCATGGCGGG	348	0.00409738
Cpeb2	ACGCGGTCTGCACCGACCAG	1078	0.0126925
Cpeb2	CAGACTCGGTTTGAAGTCCT	435	0.00512173
Cpeb2	TCATGGACGATGGCAGCCCG	927	0.0109146
Cpeb2	TGCCGCTGGGCGAAGTCCTG	343	0.00403851
Cpeb2	GCGGCGGCTTCGCGTCCGGA	569	0.00669946
Cpeb2	AGGGGGGCAAGCCCGCATTG	613	0.00721752
Cpeb3	GGTAAACACTACCCTCCCAG	673	0.00792396
Cpeb3	AGTGGAACGCTACTCTAGAA	447	0.00526302
Cpeb3	ATGCAGCCAGGAGCTATGGG	633	0.007453
Cpeb3	AGTGCTCCGTCCAACCCGTG	1044	0.0122922
Cpeb3	CACAGGCACTACAAACGCGG	836	0.00984314
Cpeb3	GCTGCACGAGGGAACTTGGG	601	0.00707623
Cpeb3	GCCAGGCGCCCTATGCGCAG	791	0.00931331
Cpeb3	GTCTGCGCCAGGCCGATCTG	970	0.0114209
Cpeb3	GGCTGATGGAAACTCAAGCC	556	0.0065464
Cpeb3	TTCGGGCTTGGGGATCTCTG	839	0.00987846
Cpeb4	GGTGGAAGTCCCGAGACCGG	483	0.00568689
Cpeb4	CACCGCAGAGGGCTGAACGG	653	0.00768848
Cpeb4	CATTATTAGCTGAAGCGCCA	525	0.0061814
Cpeb4	TGTGTTCACAGGAACGCCCC	688	0.00810058
Cpeb4	CTGAATGTTATGAGTAGCCG	339	0.00399142
Cpeb4	TTAAGATTATTCGCCAAATG	492	0.00579285
Cpeb4	CTGCTTCACTCACCAGAATG	726	0.00854799
Cpeb4	AGGACTTATGGGCGAAGGAG	537	0.00632269
Cpeb4	TGCTGGAAATGGGGGTGATG	443	0.00521592
Cpeb4	AATACTGCCTGAAACTGAAA	336	0.0039561
Cpsf1	TAGCCGGGAAGACTCAACCA	770	0.00906605
Cpsf1	AACAACACCTCCTTAACCAA	865	0.0101846
Cpsf1	GGATATTTATGGCTATTCGG	295	0.00347336
Cpsf1	GGGTGGCCGAAGTGGCTCCG	612	0.00720575
Cpsf1	AGCACTCATGATAACCACAT	782	0.00920734
Cpsf1	CCGAGCGTTTCACTTTGACA	478	0.00562802
Cpsf1	CAATGCTCATCTATGGCACG	677	0.00797106
Cpsf1	GCAGGACACGTGCTCCATTG	1290	0.0151886
Cpsf1	AATTGAAGTTTATGGCAGTG	404	0.00475673
Cpsf1	GGCGCCTGCAAGCTGCACAC	989	0.0116446
Cpsf2	AACGTCCTGGAAACGCTTCG	885	0.0104201
Cpsf2	CGGGAACGTGCTGATAGCTG	720	0.00847735
Cpsf2	CCAGCTGGTCATATGATAGG	445	0.00523947
Cpsf2	GTGCCCTCCCATTCGCCGTG	1402	0.0165073
Cpsf2	GAGCCAAGTCAGAAAGACCG	563	0.00662881
Cpsf2	ATCTGGCTTGACAAATGGAG	489	0.00575753
Cpsf2	TAACTTATAGGACAACTCCG	588	0.00692317
Cpsf2	CCACATCATCCAATGTAAAG	659	0.00775913
Cpsf2	GGAAGACGTGGACCAGCCAT	555	0.00653462
Cpsf2	CGTTGTAACTGACGTTGTTC	421	0.00495689
Cpsf3	GGAATGGCGTCATCATCGCG	1041	0.0122568
Cpsf3	TTATTTAGGAGTCTACGTAT	427	0.00502754
Cpsf3	GTGAGGCCATCACAACACTG	1022	0.0120331
Cpsf3	GCACGACATTGTCAACAGAG	929	0.0109381
Cpsf3	ATTCCCAGACTAACCACGTG	815	0.00959589
Cpsf3	AGCGATCTCTATCATAAACA	428	0.00503931
Cpsf3	CTTACTGACTGATCAACAGA	531	0.00625204
Cpsf3	GTATGTCATGCAGCTCCGGG	684	0.00805348
Cpsf3	CAAGCACATCAGCAACCTCA	1029	0.0121155
Cpsf3	GCTGTACACTGAGACAGACT	575	0.0067701
Cpsf4	GGTGTGCCGATGCCTACACA	938	0.0110441
Cpsf4	AGAAGCCGCGGTCATACCAA	469	0.00552205
Cpsf4	GACTGCCCTTGGTATGACCG	653	0.00768848
Cpsf4	TGTCCATTCCGCCACATCAG	1023	0.0120449
Cpsf4	GTTCGACTTGGAGATCGCCG	744	0.00875993
Cpsf4	CCTTGTTGGATTCTGCCCTG	399	0.00469786
Cpsf4	TTGGAGTAAAAGTAGCACTC	490	0.00576931
Cpsf4	TCACTATCCATGCCGGGGAA	592	0.00697026
Cpsf4	CGACCCTGAATCCAAGATCA	570	0.00671123
Cpsf4	ATTCATGCAAGAACTCACAC	723	0.00851267
Cpsf4l	AACATGGCGGTATTTACACA	507	0.00596947
Cpsf4l	CTGGATGTGGAATCGCAGAA	496	0.00583995
Cpsf4l	ACTGCCCGTGGTATAACCAA	600	0.00706446
Cpsf4l	GAACATGGCGGTATTTACAC	540	0.00635801
Cpsf4l	CAGAACCCTTGGTTATACCA	523	0.00615785
Cpsf4l	TTGGAGTGGAAATAGCACAC	444	0.0052277
Cpsf4l	GTGTGCAACTTCTTCGCTAA	805	0.00947815
Cpsf4l	TCACCCTGCTCGTGCCGGAG	888	0.0104554
Cpsf4l	AGCAATCACTCTTCCGGCAG	655	0.00771203
Cpsf4l	TGAGAACTGGCTTCAAGTGC	637	0.0075001
Cpsf6	CTAGCAGGACCTCCTAACCG	991	0.0116681
Cpsf6	ACGTTGTGTACACTTACACT	504	0.00593414
Cpsf6	AGTGTACACAACGTTTGGTG	651	0.00766493
Cpsf6	TTCAGATCCAACACCAACAA	802	0.00944282
Cpsf6	CATGTAGTCGCGATCTTCTG	715	0.00841848
Cpsf6	CTCAGGAACTGCTTATTGCA	395	0.00465077
Cpsf6	GCGCGTGAACCGCCTCCTGG	1065	0.0125394
Cpsf6	AGTGTGAGGGGAGGCCCTAG	609	0.00717042
Cpsf6	CCACCTCCAGTTCCAGGCTA	737	0.00867751
Cpsf6	GGGCCAGGTGGGCCTAAAGG	419	0.00493335
Cpsf7	AGGGTACAAGATTCTCAGAG	11	0.000129515
Cpsf7	AAGTAGGGCAACACGCTGGG	923	0.0108675
Cpsf7	TGCTGGTCTGTGGTCCACTG	736	0.00866573
Cpsf7	GAGGGTACAAGATTCTCAGA	496	0.00583995
Cpsf7	TGCTGGTAGTGGATACCAGG	401	0.00472141
Cpsf7	AGATGACAGAAGCAGTAGCA	494	0.0058164
Cpsf7	CCCCCCACCAAATGCTACAG	658	0.00774735
Cpsf7	GGTGGGGGCAGACCCATTAG	384	0.00452125
Cpsf7	ATGGAGAAAAAGTAGATGTG	353	0.00415625
Cpsf7	TTCCTTAAGATATGCTGAGG	518	0.00609898
Crnkl1	TACCAGAACTGGTTGACGCG	853	0.0100433
Crnkl1	TATGGACGAACACCTCTATG	906	0.0106673
Crnkl1	AGAGTGCATAGTTAACCCAA	507	0.00596947
Crnkl1	GTATAAGTACACATACATGG	687	0.0080888
Crnkl1	GTTCTTCGGACATTTGCCTA	474	0.00558092
Crnkl1	ACTACCGAAATATTACCCTC	473	0.00556915
Crnkl1	ATAGCGTTCATAGATGGTGC	536	0.00631091
Crnkl1	AATTAAACGATTACAAACTC	457	0.00538076
Crnkl1	AAGAAGTTTGGTGACCGGAG	339	0.00399142
Crnkl1	GTTTGATTATTTACGCTTGG	234	0.00275514
Cryz	AGAGACATACATTCGCTCTG	621	0.00731171
Cryz	CTAATCAAAGTCCACGCCTG	812	0.00956056
Cryz	GCTTTCGCCAGCTCGAGCAC	811	0.00954879
Cryz	TTTGTGATTAAACACTTCGT	364	0.00428577
Cryz	AGAAGTGCTGAAGCTCCAGT	659	0.00775913
Cryz	TTCCGCGTAGCCACCAGAGA	797	0.00938395
Cryz	GCTGGGATCATAGAATCCGT	479	0.00563979
Cryz	CGAGACACTGAACTTCAGGC	674	0.00793574
Cryz	GCAGATGTCTGTTGGTGACA	496	0.00583995
Cryz	TGCCAGATTGCCAGAGCTCA	494	0.0058164
Csdc2	TACAGACGCCCTTGAACACG	1114	0.0131163
Csdc2	CACGCCTGAGAATGGCTCCG	567	0.00667591
Csdc2	AGAGTCTACATTACCGCCAG	670	0.00788864
Csdc2	GACGCCCTTGAACACGGGGC	752	0.00885412
Csdc2	GGCAGTAGGATCTGGGAACG	416	0.00489802
Csdc2	TATGTCCTGGTCCGCTTGGT	920	0.0108322
Csdc2	TCCCTGTGGAAGGGGAACGT	635	0.00747655
Csdc2	GGCCGAGGCTCGAGCTGTCC	914	0.0107615
Csdc2	AAGCAGTTCTCCCGCTCCCA	872	0.010267
Csdc2	AGAGGGCTGGGCAGGTCCCG	494	0.0058164
Csde1	TTGAAGTATCATCTGACCGG	757	0.00891299
Csde1	GGAACGAGCAACCAACATAG	623	0.00733526
Csde1	AACCTCCAAGACTTAAAAGT	462	0.00543963
Csde1	TGACGTGGAATTCACAATCA	521	0.0061343
Csde1	TTAGTATTAGTGACAAACAG	445	0.00523947
Csde1	AGTGTATGCTACGAACGTAA	408	0.00480383
Csde1	AGGATTAAAAAACTTCCCAA	137	0.00161305
Csde1	AAAAGTACCCAGTAAAAACC	407	0.00479206
Csde1	AGGAGTAGTTTGTGCCATGA	358	0.00421513
Csde1	TTTCTTTAGGAGGCAGAAGA	338	0.00397964
Csrp1	CTGGGCGGTACTCACTACAC	641	0.00754719
Csrp1	GCACGCTGAGCACAGACAAG	1183	0.0139288
Csrp1	TAGACCGCCTGGCTACAGCG	950	0.0111854
Csrp1	GTACTCACTACACAGGAAGC	549	0.00646398
Csrp1	CATGTTACGGCAAGAAGTAT	457	0.00538076
Csrp1	ATGTGGGGTATGCCAGAAGA	337	0.00396787
Csrp1	GAATCTGGACAGCACCACCG	955	0.0112443
Csrp1	GGGCAAACTTGGATGCATTG	458	0.00539253
Csrp1	GCTGAGGAGGTCCAGTGCGA	615	0.00724107
Csrp1	ACTTCTGTGTGTAGAGCCCC	557	0.00655817
Cstf1	CCGAACTCTTTACGACCACG	890	0.0104789
Cstf1	ATGTCATACAGGCGAAGCGT	755	0.00888944
Cstf1	GAATGGTACCTCAATTGGCA	571	0.00672301
Cstf1	CCACAAAGGCCCGTGCCGCG	951	0.0111972
Cstf1	GGTTACATTAGTATCGCCAA	526	0.00619317
Cstf1	CAATGAGATCAAGCCCCAGT	597	0.00702913
Cstf1	ACTGCGGTCCAGTATGCCAT	747	0.00879525
Cstf1	GTGACGTACATGTTGGCACT	856	0.0100786
Cstf1	CGTTCAAACAATGTCACCAG	695	0.00818299
Cstf1	CGCAACATTTCGGCTTCCTG	626	0.00737058
Cstf2	GTCATTAAAGTGCCTCCCCG	754	0.00887767
Cstf2	CTGCAGATTGGTATACGATA	533	0.00627559
Cstf2	GTGATGCTCCCAATGACCCG	677	0.00797106
Cstf2	ACAGGTAGTGATGAGAATTG	490	0.00576931
Cstf2	GGACCAGTGCCCATGGAACG	649	0.00764139
Cstf2	AGACAGCACTTAGTGCCATG	718	0.0084538
Cstf2	CAGGGTGGAATGCATGTCAA	399	0.00469786
Cstf2	CCTCTCATGTCATGTGGAGG	654	0.00770026
Cstf2	TGAATGGGCGTGAATTCAGC	552	0.0064993
Cstf2	TGGAGAAAGCATCAGCCCTG	601	0.00707623
Cstf2t	TATATGGGACCACCCCATCA	809	0.00952524
Cstf2t	GAGAGCAAAGTCCCTCCACG	875	0.0103023
Cstf2t	CCTAGACCTCCGATGCCTCG	920	0.0108322
Cstf2t	GCAAAGCATACGCCAACTGT	745	0.0087717
Cstf2t	GTTAAAGAGCTTAGGCCCGG	364	0.00428577
Cstf2t	TCGTCTACGATAGAGAGACT	520	0.00612253
Cstf2t	AGACCTCTCTGATCTATCAT	494	0.0058164
Cstf2t	AGACCGGCTGAGATTTGCCT	553	0.00651107
Cstf2t	CTGATGCAGACCTCTATCCA	809	0.00952524
Cstf2t	TCAACATGACGTTAGGTCCC	887	0.0104436
Cstf3	TGCTACAGTAATATTCCATG	482	0.00567511
Cstf3	GTCCGAAGAGTTTATCAACG	380	0.00447416
Cstf3	AAATGAATATTGATACCCTA	362	0.00426222
Cstf3	GTGGAAGAAGTACATCCAGT	482	0.00567511
Cstf3	AGTTAGGTTACTCACTAAGG	504	0.00593414
Cstf3	GAATGCTAGACGTGTAGCAA	491	0.00578108
Cstf3	TTGGAGCATTCTCATTCGAG	664	0.007818
Cstf3	ACTCGACTGTTCCAGATACT	689	0.00811235
Cstf3	CTAGAATCAACTTACCATTG	564	0.00664059
Cstf3	TTCATACGTCAGAGAAACCA	590	0.00694672
Ctif	GCTGCTGACCGACAAGACAG	955	0.0112443
Ctif	CCAAGAAGTTGTTCCGAAGG	490	0.00576931
Ctif	CTTCACCCAGTTCCATCGGA	804	0.00946637
Ctif	TACCCTTCTCTGTCGATGTG	742	0.00873638
Ctif	GACAACTCCCTGGACATGCT	656	0.00772381
Ctif	CGGCAACATGAAACATCCAC	929	0.0109381
Ctif	AGGCAGTGCCAAACACAACA	732	0.00861864
Ctif	ACACATAAAACACACCTCAG	701	0.00825364
Ctif	CCAGGGGACACCGGACACAG	772	0.0090896
Ctif	TGTTATTTCTCATGCTGTTA	435	0.00512173
Ctnna1	GGTGACTACATGAATGACTC	603	0.00709978
Ctnna1	CCTGCACACGTGATGACCGT	1274	0.0150002
Ctnna1	CCAGGAAAGAATCTGATACG	383	0.00450948
Ctnna1	TCTGTAGAAACAAATCATTG	381	0.00448593
Ctnna1	CTTCAATCAGTACTAATAGA	336	0.0039561
Ctnna1	TGTGGGCAATCGTGATCAGA	525	0.0061814
Ctnna1	GGGCCGTCTAATAAAAAGAG	311	0.00366174
Ctnna1	GAAGCGAGGCAACATGGTCC	863	0.010161
Ctnna1	GCAGGTTATCAATGCTGCAT	628	0.00739413
Ctnna1	ATCATCTGATGCAGTAGCCT	476	0.00560447
Ctnnb1	CCATTCATAAAGGACTTGGG	439	0.00516883
Ctnnb1	GACAAAACTGCTAAACGATG	758	0.00892476
Ctnnb1	GATTAACTATCAGGATGACG	586	0.00689962
Ctnnb1	ATGAGCAGCGTCAAACTGCG	928	0.0109264
Ctnnb1	TGGCCAGCAAGCCCTCGCGG	680	0.00800638
Ctnnb1	TAACAGTTCACCTTTATCAG	568	0.00668768
Ctnnb1	GCTGCACTAGAGTCCCAAGG	628	0.00739413
Ctnnb1	AAGCCTTAGTAAACATAATG	355	0.0041798
Ctnnb1	CCTGTCACCAGCACGAAGGA	501	0.00589882
Ctnnb1	AATCTCCTGCTCCATCAGGA	868	0.0102199
Ctnnbl1	CAAACTGGTCCTCGAGAACG	553	0.00651107
Ctnnbl1	GAAGCGATCCTACAAAAACC	699	0.00823009
Ctnnbl1	CAGATTCTGCACCAACAATG	581	0.00684075
Ctnnbl1	CCTCTGTGCACATCTCCGGA	688	0.00810058
Ctnnbl1	CATTCAGGAGATGCACGTGG	652	0.00767671
Ctnnbl1	ATTGGAGCTGAGCATTAAGC	493	0.00580463
Ctnnbl1	GAGGAGATCGACCACAGCTA	1033	0.0121626
Ctnnbl1	TGTGCCTTCAGGCCCAATCA	662	0.00779445
Ctnnbl1	GATTATTGACAGGGATGGCG	613	0.00721752
Ctnnbl1	GCTGTACTGTAGTGAAGTGC	571	0.00672301
Ctnnd1	GATTGTGGAAACCTACACCG	472	0.00555737
Ctnnd1	CTGATTATGGTACTGCCCGT	697	0.00820654
Ctnnd1	GCCCAATAGTACTGATCAGG	711	0.00837138
Ctnnd1	CTTATGCTACCGCAATGACA	819	0.00964298
Ctnnd1	CTCCTCAATTCGGGTCACCC	587	0.00691139
Ctnnd1	TCTGGTCCGATTGCTCCGAA	796	0.00937218
Ctnnd1	CCAATGGCACCCTCACTCGT	890	0.0104789
Ctnnd1	ACAGGCAGAGCGTTACCAGG	866	0.0101964
Ctnnd1	GACTCCCATTCAATATGCCG	519	0.00611075
Ctnnd1	CTTGCGAAAATCACGGCCCA	779	0.00917202
Cwc15	GCAGGAATCTGGTCTAAGCG	433	0.00509818
Cwc15	ACGGTTTCGAACCTCTTCAG	575	0.0067701
Cwc15	AAAACACATACGTCTGTGAG	768	0.0090425
Cwc15	ACAGTACGGGTACCTCGAGT	690	0.00812412
Cwc15	TACGGGTACCTCGAGTTGGG	518	0.00609898
Cwc15	CTACTTAAGACAAACCACAC	816	0.00960766
Cwc15	CAGCAGGAATCTGGTCTAAG	542	0.00638156
Cwc15	GTACTTTATCTTTGTATGAG	288	0.00339094
Cwc15	AGAGCTAGAAAAGATCAAGA	293	0.00344981
Cwc15	GAACCTGCAAGAGGTGGGAG	697	0.00820654
Cwc22	CATCAATGGTCTCATCAACA	961	0.0113149
Cwc22	AGGCTATCGAAGGAACGATA	426	0.00501576
Cwc22	TTTGTAGAAATCCTTGACGA	399	0.00469786
Cwc22	TTGTACGGCGAAACGAGACT	714	0.0084067
Cwc22	TTAACCCAGGTGTCACCAAG	773	0.00910137
Cwc22	ATCCGATTACTTACACTCCA	607	0.00714687
Cwc22	ACTCGTGTAGAATGTTTCGA	409	0.0048156
Cwc22	TCTATCTTGCCATTCAGTCA	914	0.0107615
Cwc22	ACGATGACAGCATGGAATCA	661	0.00778268
Cwc22	TCTGGAAGGACTTGATTTAG	443	0.00521592
Cwc25	GGGACTCTGACCGGAACCGG	731	0.00860686
Cwc25	CTACCTGTAAGCCATATCCA	610	0.0071822
Cwc25	GGAGATGCAGCGCTACGCTG	811	0.00954879
Cwc25	CAGTACCTTATGATGAAGAG	484	0.00569866
Cwc25	TCACGGTTCACCATGCCACC	1017	0.0119743
Cwc25	ACGGGGCAAAGATTGAGCCT	304	0.00357932
Cwc25	TTCGCAATGTGGAGAAAGTG	602	0.007088
Cwc25	CAAGAAGCTCCTCACCCCCC	799	0.0094075
Cwc25	AAACACAGAAGCTCCAGCAG	557	0.00655817
Cwc25	AATGAAGAAAATCAAAGAGC	290	0.00341449
Cwc27	GGGAGCCTACCTGACTGACT	811	0.00954879
Cwc27	CCTGGCTTTATAGTCCAAGG	338	0.00397964
Cwc27	ACATAGAATCAAGAGTTGTG	478	0.00562802
Cwc27	CCACCTTGGACTATAAAGCC	550	0.00647575
Cwc27	TAAGCACACCATCTTTGGAA	484	0.00569866
Cwc27	GAGATATTGACATAGAGTTG	493	0.00580463
Cwc27	AGTGTGAAGTCAGCCGGAGA	478	0.00562802
Cwc27	AGTGAAAAAGATGATGCAAC	491	0.00578108
Cwc27	ATGTGGACCAGCATTTGCCA	536	0.00631091
Cwc27	GTCAAGAAATTGAAACCCAA	378	0.00445061
Cwf19l1	ATATCTTACTCACGTCCCCG	968	0.0113973
Cwf19l1	TGTGCTTGGTGCCAATAACG	428	0.00503931
Cwf19l1	AGGTACTTACGAGGCTTGCG	569	0.00669946
Cwf19l1	TCGCCGTGAGCTTGAAACCG	704	0.00828896
Cwf19l1	TTGCGAGGCTGCTTAGCGTG	876	0.0103141
Cwf19l1	CGCCAGCGCTATGAAGCGAG	658	0.00774735
Cwf19l1	GGGTTCTCGGTGACGTCCGG	542	0.00638156
Cwf19l1	ATCCTTGGGACTAAAGCTGT	392	0.00461544
Cwf19l1	CAAATCGAAGAAGAACTGAC	558	0.00656994
Cwf19l1	CGGACAATTCAGAAGAAAAG	281	0.00330852
Cwf19l2	GGCAAAAAGATTGGGCGTAG	368	0.00433287
Cwf19l2	AGCATGAGTTGTGATCCACC	733	0.00863041
Cwf19l2	TCGCCTATCAGATCGACTGC	857	0.0100904
Cwf19l2	AAGACTGTGGATGGGAACGG	476	0.00560447
Cwf19l2	GAAAACCCAAGTGTTAGAGC	464	0.00546318
Cwf19l2	GTGAAGAACGTAAGCGACTT	464	0.00546318
Cwf19l2	AAGTTTAGTGGTCCTGACAC	856	0.0100786
Cwf19l2	TATCTGACAAAGAAAAGACC	367	0.00432109
Cwf19l2	AAAGTCTTGTCAAAGAATGA	337	0.00396787
Cwf19l2	GACCCTTTCTTTATCCTCAT	540	0.00635801
Cybb	TTTACCAGACGAATTGTACG	645	0.00759429
Cybb	CCTCTACCAAAACCATTCGG	571	0.00672301
Cybb	ATTCTAACTTGGATACCTTG	545	0.00641688
Cybb	TTGGCGATCTCAGCAAAAGG	802	0.00944282
Cybb	GAGGGGCTATTCAATGCTTG	555	0.00653462
Cybb	CAGAGAGAGCTATTGAATAC	457	0.00538076
Cybb	GGATTCGAAGACAACTGGAC	569	0.00669946
Cybb	TTATACTCGAAAACTCCTTG	621	0.00731171
Cybb	TGCCCAGTACCAAAGTTCGC	784	0.00923089
Cybb	ACCGAGTCACGGCCACATAC	1267	0.0149178
Dazap1	TTAAAGACCCCAATTGTGTG	669	0.00787687
Dazap1	TTTCGAGGACGAACAATCAG	906	0.0106673
Dazap1	GCACTGTCCCCACACAATTG	756	0.00890121
Dazap1	CCATATCCTTGTTGCCACGT	642	0.00755897
Dazap1	TGGCTATGGCCCACCCCCTG	608	0.00715865
Dazap1	CGAAGCCGTGCACACCTCGG	1141	0.0134342
Dazap1	AGGTTAAACGGGCTGAACCA	532	0.00626382
Dazap1	CTGGACTGGAGTACCACTCA	630	0.00741768
Dazap1	ATCCAACAAGATCTTTGTCG	654	0.00770026
Dazap1	ACTCTGTCCACAGGTCACAG	921	0.0108439
Dazl	GATCGAACTGGTGTGTCGAA	535	0.00629914
Dazl	GGATTAAAAATCAAAGGACG	264	0.00310836
Dazl	CAAAACATATCCTTGACTTG	544	0.00640511
Dazl	TTGGACTACTCCAAACACTC	703	0.00827719
Dazl	ACCTGAACATACTGAGTGAT	546	0.00642865
Dazl	ATCGAACTGGTGTGTCGAAG	3	3.53223e-05
Dazl	TAGTCACAGATAAATTTCCA	372	0.00437996
Dazl	TATCCAGTGATGACCTGAAC	827	0.00973718
Dazl	ATCAATTCCTCCAACAAAAA	328	0.0038619
Dazl	AGGAGTTTCTTTGCCAGATA	355	0.0041798
Dbr1	GCTGGTGTTGTCAAATACCG	370	0.00435641
Dbr1	TGCGCGGAGAACCAGTACGC	815	0.00959589
Dbr1	CATTTGCAAGAGTTACCCTA	467	0.0054985
Dbr1	GACCTGATTAATGTGACTGG	402	0.00473319
Dbr1	ATGGTAGATGAATTATAAGG	301	0.003544
Dbr1	CTTCCAGGCGGTGCGCAACG	1085	0.0127749
Dbr1	CTGTCATGGTGAAGTTACAG	738	0.00868928
Dbr1	TGAGACAAGAATATATGTAC	386	0.0045448
Dbr1	AATGAAGATGGTGAGAACCG	637	0.0075001
Dbr1	GTGTGGCAAGCACTTGTCCA	699	0.00823009
Dcaf13	ATATAGTACTGTATGATATG	525	0.0061814
Dcaf13	GTTGTACACAGTATTAGGAA	459	0.00540431
Dcaf13	AAAAGAACATTACCTCAACA	879	0.0103494
Dcaf13	CCTGTGTGCTCAATGAACTG	795	0.0093604
Dcaf13	AAAGCTCTCACATATTCTCG	477	0.00561624
Dcaf13	TCCATCACGGTGACCATCCA	1148	0.0135167
Dcaf13	AAGCTCTCACATATTCTCGT	504	0.00593414
Dcaf13	CACTCCTGTTATGGTGCACA	729	0.00858331
Dcaf13	TACAATCTGTTGGAACCCTA	771	0.00907783
Dcaf13	CGAACAATACAAGCACATGA	677	0.00797106
Dcp1a	GCCCCTCAGTCTGAAAACCT	471	0.0055456
Dcp1a	AGGTAAGTGGGGAACTTGTG	354	0.00416803
Dcp1a	TCATCGCATAGCAAAACTCA	575	0.0067701
Dcp1a	CTCTAGAAGAGACACCCTCT	694	0.00817122
Dcp1a	GAGCGGCAGAATGGATACCC	481	0.00566334
Dcp1a	GGGCCAAGGATGAGTATGAG	412	0.00485093
Dcp1a	GACTGCTGTGGCTTAGCTCA	590	0.00694672
Dcp1a	AGCTATGGGTCTAGAGTCAG	447	0.00526302
Dcp1a	TTTGGGGCAGAAAGTGTACA	436	0.0051335
Dcp1a	CATGTTCAGTCGGTTGACAA	406	0.00478028
Dcp1b	CTGGACCGGTAGGCGCACAG	785	0.00924266
Dcp1b	GGCCAAGGATGAGTACACCA	770	0.00906605
Dcp1b	GACGCGTCCAGTTCATCACG	1260	0.0148354
Dcp1b	AAATTCCATAAATGGACACT	653	0.00768848
Dcp1b	TGCAACCCTGCCATTCCAGG	990	0.0116564
Dcp1b	GCCATTCAGAAACTCATGCT	397	0.00467432
Dcp1b	GGCTGCTGCTGGGTCTCACG	771	0.00907783
Dcp1b	GAACAGTTGAAAGCCTGTCA	465	0.00547495
Dcp1b	ACAAGACAAAGCTCCCTGTC	874	0.0102906
[truncated: 11,502 more rows]

## Sheet: 1C - proliferation&survival
Gene name	Rank	Z score (lfc)	p-value	FDR		neg|score	neg|p-value	neg|fdr	pos|score	pos|p-value	pos|fdr
Snu13	1	-17.1212	2.7503e-06	1e-05		2.9478e-13	2.7503e-06	1e-05	1	1	1
Snrpb	2	-16.52	2.7503e-06	1e-05		1.009e-09	2.7503e-06	1e-05	0.99764	1	1
Sf3b5	3	-15.8581	2.7503e-06	1e-05		2.9071e-10	2.7503e-06	1e-05	1	1	1
Snrpd3	4	-15.4737	2.7503e-06	1e-05		7.5703e-12	2.7503e-06	1e-05	0.99754	1	1
Rpl7a	5	-15.2713	2.7503e-06	1e-05		1.2627e-09	2.7503e-06	1e-05	0.96129	0.99939	1
Ran	6	-15.0656	2.7503e-06	1e-05		5.4718e-09	2.7503e-06	1e-05	0.99826	1	1
Hspa8	7	-14.7056	2.7503e-06	1e-05		5.7359e-13	2.7503e-06	1e-05	1	1	1
Tubb5	8	-14.1056	2.7503e-06	1e-05		5.0952e-09	2.7503e-06	1e-05	0.99999	1	1
Rplp2	9	-13.0956	2.7503e-06	1e-05		1.0173e-07	2.7503e-06	1e-05	1	1	1
Polr2g	10	-13.0475	2.7503e-06	1e-05		3.5695e-11	2.7503e-06	1e-05	1	1	1
Eftud2	11	-12.7906	2.7503e-06	1e-05		1.6415e-10	2.7503e-06	1e-05	1	1	1
Phf5a	12	-12.7312	2.7503e-06	1e-05		1.5259e-10	2.7503e-06	1e-05	1	1	1
Lsm4	13	-12.5544	2.7503e-06	1e-05		1.3229e-09	2.7503e-06	1e-05	0.99999	1	1
Hspa9	14	-12.2338	2.7503e-06	1e-05		9.2982e-11	2.7503e-06	1e-05	1	1	1
Gapdh-ps15	15	-11.9581	2.7503e-06	1e-05		5.0352e-06	2.7503e-06	1e-05	0.58576	0.88642	1
Snrpe	16	-11.7519	2.7503e-06	1e-05		4.538e-07	2.7503e-06	1e-05	0.99999	1	1
Polr2l	17	-11.7231	2.7503e-06	1e-05		1.1765e-08	2.7503e-06	1e-05	0.99977	1	1
Prpf8	18	-11.6337	2.7503e-06	1e-05		2.4501e-08	2.7503e-06	1e-05	1	1	1
Sf3b3	19	-11.3394	2.7503e-06	1e-05		1.106e-08	2.7503e-06	1e-05	1	1	1
Rbm8a	20	-11.0825	2.7503e-06	1e-05		1.4383e-09	2.7503e-06	1e-05	1	1	1
Srsf1	21	-11.0444	2.7503e-06	1e-05		6.4566e-07	2.7503e-06	1e-05	0.21065	0.47103	1
Fau	22	-10.9306	2.7503e-06	1e-05		1.1227e-11	2.7503e-06	1e-05	1	1	1
Myc	23	-10.6175	2.7503e-06	1e-05		1.9594e-10	2.7503e-06	1e-05	1	1	1
Eif4a3	24	-10.5431	2.7503e-06	1e-05		1.5295e-05	2.7503e-06	1e-05	0.10608	0.1989	1
Polr2h	25	-10.4337	2.7503e-06	1e-05		3.8006e-08	2.7503e-06	1e-05	1	1	1
Phb	26	-10.295	2.7503e-06	1e-05		2.1952e-09	2.7503e-06	1e-05	1	1	1
Snrpa1	27	-10.2263	2.7503e-06	1e-05		4.9075e-07	2.7503e-06	1e-05	0.59109	0.89158	1
Sf3a3	28	-10.0981	2.7503e-06	1e-05		4.7646e-08	2.7503e-06	1e-05	1	1	1
Eif2s1	29	-10.0394	2.7503e-06	1e-05		2.2881e-07	2.7503e-06	1e-05	0.94394	0.99861	1
Eif3i	30	-9.77125	2.7503e-06	1e-05		3.5102e-07	2.7503e-06	1e-05	0.99042	0.99999	1
Eif4a1	31	-9.68625	2.7503e-06	1e-05		3.9417e-08	2.7503e-06	1e-05	0.99929	1	1
Atp5b	32	-9.68	2.7503e-06	1e-05		2.9674e-07	2.7503e-06	1e-05	1	1	1
Aldoa	33	-9.4775	2.7503e-06	1e-05		1.1421e-08	2.7503e-06	1e-05	1	1	1
Il2rg	34	-9.15	2.7503e-06	1e-05		5.6599e-06	2.7503e-06	1e-05	0.99945	1	1
Nxt1	35	-9.04062	2.7503e-06	1e-05		2.4226e-06	2.7503e-06	1e-05	0.82574	0.98041	1
Rack1	36	-9.03375	2.7503e-06	1e-05		1.0362e-07	2.7503e-06	1e-05	0.06855	0.13371	1
Imp3	37	-9.025	2.7503e-06	1e-05		2.2247e-06	2.7503e-06	1e-05	0.95298	0.99914	1
Polr2j	38	-8.86875	2.7503e-06	1e-05		1.4386e-07	2.7503e-06	1e-05	0.99073	0.99999	1
Sf3a1	39	-8.8625	2.7503e-06	1e-05		4.5205e-05	2.7503e-06	1e-05	0.99988	1	1
Exosc6	40	-8.85812	2.7503e-06	1e-05		3.4127e-05	2.7503e-06	1e-05	0.99931	1	1
Heatr1	41	-8.755	2.7503e-06	1e-05		8.1146e-07	2.7503e-06	1e-05	0.99988	1	1
Prpf19	42	-8.68625	2.7503e-06	1e-05		3.8217e-07	2.7503e-06	1e-05	0.99997	1	1
Rbm22	43	-8.66187	2.7503e-06	1e-05		4.2701e-07	2.7503e-06	1e-05	1	1	1
Sf3b4	44	-8.6075	2.7503e-06	1e-05		1.6431e-06	2.7503e-06	1e-05	0.99859	1	1
Pabpc1	45	-8.465	2.7503e-06	1e-05		5.7107e-06	2.7503e-06	1e-05	0.99994	1	1
Eef1a1	46	-8.41313	2.7503e-06	1e-05		3.7894e-06	2.7503e-06	1e-05	0.99809	1	1
Yars	47	-8.34813	2.7503e-06	1e-05		1.8631e-06	2.7503e-06	1e-05	1	1	1
Polr2e	48	-8.28813	2.7503e-06	1e-05		1.1487e-06	2.7503e-06	1e-05	0.99995	1	1
Vcp	49	-8.28187	2.7503e-06	1e-05		2.4507e-05	2.7503e-06	1e-05	0.63667	0.91317	1
Ogdh	50	-8.22312	2.7503e-06	1e-05		3.0414e-05	2.7503e-06	1e-05	0.9856	0.99996	1
Polr2i	51	-8.215	2.7503e-06	1e-05		1.8139e-05	2.7503e-06	1e-05	0.86878	0.98735	1
Clp1	52	-8.15938	2.7503e-06	1e-05		1.2339e-06	2.7503e-06	1e-05	0.99999	1	1
Snrpd1	53	-8.13312	2.7503e-06	1e-05		1.378e-06	2.7503e-06	1e-05	1	1	1
Sf3b2	54	-8.125	2.7503e-06	1e-05		1.925e-06	2.7503e-06	1e-05	1	1	1
Ppan	55	-8.11187	2.7503e-06	1e-05		6.6924e-05	2.7503e-06	1e-05	0.99977	1	1
Puf60	56	-8.1	2.7503e-06	1e-05		4.27e-05	2.7503e-06	1e-05	0.99823	1	1
Nudt21	57	-8.05187	2.7503e-06	1e-05		2.6516e-05	2.7503e-06	1e-05	0.99989	1	1
Sf3b6	58	-8.03875	2.7503e-06	1e-05		9.8597e-05	2.7503e-06	1e-05	0.90579	0.99484	1
Eef2	59	-8.01625	2.7503e-06	1e-05		2.1894e-07	2.7503e-06	1e-05	1	1	1
Srsf2	60	-7.99625	2.7503e-06	1e-05		1.1715e-05	2.7503e-06	1e-05	0.99918	1	1
Eif3b	61	-7.87937	2.7503e-06	1e-05		2.6594e-07	2.7503e-06	1e-05	1	1	1
U2af1	62	-7.83812	2.7503e-06	1e-05		4.4644e-06	2.7503e-06	1e-05	0.91588	0.99702	1
Rrs1	63	-7.775	2.7503e-06	1e-05		2.0737e-05	2.7503e-06	1e-05	0.85152	0.9843	1
Ints11	64	-7.75875	2.7503e-06	1e-05		9.6549e-07	2.7503e-06	1e-05	0.99982	1	1
Atp5c1	65	-7.75375	2.7503e-06	1e-05		7.9542e-08	2.7503e-06	1e-05	0.7539	0.96388	1
Dut	66	-7.7425	2.7503e-06	1e-05		0.00010403	2.7503e-06	1e-05	0.9992	1	1
Arcn1	67	-7.73188	2.7503e-06	1e-05		2.8234e-05	2.7503e-06	1e-05	0.30835	0.60945	1
Ncbp1	68	-7.69563	2.7503e-06	1e-05		9.2716e-07	2.7503e-06	1e-05	1	1	1
Wdr43	69	-7.67625	2.7503e-06	1e-05		8.0509e-07	2.7503e-06	1e-05	0.9903	0.99999	1
Chmp4b	70	-7.66625	2.7503e-06	1e-05		1.6241e-06	2.7503e-06	1e-05	1	1	1
Eif3g	71	-7.56437	2.7503e-06	1e-05		1.5482e-06	2.7503e-06	1e-05	1	1	1
Polr2b	72	-7.55062	2.7503e-06	1e-05		1.5062e-05	2.7503e-06	1e-05	0.71677	0.94549	1
Ddx41	73	-7.46688	2.7503e-06	1e-05		5.172e-06	2.7503e-06	1e-05	0.99999	1	1
Bysl	74	-7.45312	2.7503e-06	1e-05		1.1547e-05	2.7503e-06	1e-05	0.99996	1	1
Dkc1	75	-7.435	2.7503e-06	1e-05		4.8242e-08	2.7503e-06	1e-05	1	1	1
Dhx8	76	-7.40438	2.7503e-06	1e-05		1.1234e-06	2.7503e-06	1e-05	0.99998	1	1
Sfpq	77	-7.34375	2.7503e-06	1e-05		2.1841e-06	2.7503e-06	1e-05	1	1	1
Twistnb	78	-7.3025	2.7503e-06	1e-05		3.9367e-06	2.7503e-06	1e-05	0.99995	1	1
Ddx47	79	-7.3	2.7503e-06	1e-05		5.2862e-08	2.7503e-06	1e-05	1	1	1
Bud31	80	-7.24	2.7503e-06	1e-05		2.6179e-06	2.7503e-06	1e-05	1	1	1
Eif4e	81	-7.235	2.7503e-06	1e-05		3.8886e-07	2.7503e-06	1e-05	1	1	1
Pabpn1	82	-7.2275	2.7503e-06	1e-05		0.00014713	2.7503e-06	1e-05	0.86221	0.98644	1
Nsa2	83	-7.19562	2.7503e-06	1e-05		2.2203e-05	2.7503e-06	1e-05	0.99817	1	1
Nutf2	84	-7.18	2.7503e-06	1e-05		0.00035791	2.7503e-06	1e-05	0.94691	0.99888	1
Sf3b1	85	-7.17188	2.7503e-06	1e-05		1.946e-06	2.7503e-06	1e-05	0.93729	0.99816	1
Lsm8	86	-7.12437	2.7503e-06	1e-05		6.4279e-09	2.7503e-06	1e-05	1	1	1
Dhx15	87	-7.06875	2.7503e-06	1e-05		0.00024043	2.7503e-06	1e-05	0.7674	0.96702	1
Gnl2	88	-6.99	2.7503e-06	1e-05		0.00021933	2.7503e-06	1e-05	0.99656	1	1
U2af2	89	-6.9725	2.7503e-06	1e-05		8.8687e-06	2.7503e-06	1e-05	0.94487	0.99867	1
Hspe1	90	-6.9625	2.7503e-06	1e-05		7.9515e-09	2.7503e-06	1e-05	1	1	1
Crnkl1	91	-6.9525	2.7503e-06	1e-05		5.6144e-06	2.7503e-06	1e-05	0.92906	0.99759	1
Lsm2	92	-6.92125	2.7503e-06	1e-05		1.6212e-05	2.7503e-06	1e-05	0.98506	0.99996	1
Xpo1	93	-6.91625	2.7503e-06	1e-05		2.053e-05	2.7503e-06	1e-05	0.92732	0.99748	1
Mdn1	94	-6.88063	2.7503e-06	1e-05		0.00025492	2.7503e-06	1e-05	0.99871	1	1
Rpa1	95	-6.87312	2.7503e-06	1e-05		2.6603e-06	2.7503e-06	1e-05	1	1	1
Nop58	96	-6.81188	2.7503e-06	1e-05		2.2396e-05	2.7503e-06	1e-05	0.98511	0.99996	1
Uba1	97	-6.80125	2.7503e-06	1e-05		1.8801e-06	2.7503e-06	1e-05	0.95445	0.99917	1
Farsb	98	-6.77438	2.7503e-06	1e-05		0.00022274	2.7503e-06	1e-05	0.94638	0.99887	1
Ddx54	99	-6.76063	2.7503e-06	1e-05		2.5331e-05	2.7503e-06	1e-05	0.99997	1	1
Magoh	100	-6.74687	2.7503e-06	1e-05		0.00017725	2.7503e-06	1e-05	0.68661	0.9292	1
Son	101	-6.7275	2.7503e-06	1e-05		9.7504e-06	2.7503e-06	1e-05	0.4348	0.70836	1
Vars	102	-6.70562	2.7503e-06	1e-05		9.0374e-06	2.7503e-06	1e-05	0.19981	0.44784	1
Hnrnpu	103	-6.63187	2.7503e-06	1e-05		8.7611e-07	2.7503e-06	1e-05	1	1	1
Sars	104	-6.57875	2.7503e-06	1e-05		0.0012454	2.7503e-06	1e-05	0.67467	0.9254	1
Gtpbp4	105	-6.57563	2.7503e-06	1e-05		3.7749e-05	2.7503e-06	1e-05	0.97605	0.99979	1
Ddx24	106	-6.57	2.7503e-06	1e-05		2.6684e-07	2.7503e-06	1e-05	1	1	1
Ikbkg	107	-6.56812	2.7503e-06	1e-05		1.6497e-05	2.7503e-06	1e-05	0.96919	0.9996	1
Polr2d	108	-6.52813	2.7503e-06	1e-05		9.1378e-06	2.7503e-06	1e-05	0.99999	1	1
Kpnb1	109	-6.46875	2.7503e-06	1e-05		4.4263e-06	2.7503e-06	1e-05	0.99811	1	1
Exosc7	110	-6.455	2.7503e-06	1e-05		2.7135e-05	2.7503e-06	1e-05	0.92448	0.99714	1
Eif3a	111	-6.44375	2.7503e-06	1e-05		9.6222e-05	2.7503e-06	1e-05	0.095307	0.1989	1
Eif6	112	-6.43	2.7503e-06	1e-05		2.9883e-06	2.7503e-06	1e-05	0.99991	1	1
Lsm7	113	-6.41312	2.7503e-06	1e-05		1.3324e-05	2.7503e-06	1e-05	0.95263	0.99914	1
Hnrnpk	114	-6.4125	2.7503e-06	1e-05		3.4935e-05	2.7503e-06	1e-05	0.99997	1	1
Supt5	115	-6.40312	2.7503e-06	1e-05		4.1927e-06	2.7503e-06	1e-05	1	1	1
Copa	116	-6.4025	2.7503e-06	1e-05		2.3607e-07	2.7503e-06	1e-05	0.98615	0.99996	1
Srsf3	117	-6.38313	2.7503e-06	1e-05		1.7063e-06	2.7503e-06	1e-05	1	1	1
Ddx27	118	-6.3575	2.7503e-06	1e-05		0.00012325	2.7503e-06	1e-05	0.99719	1	1
Btf3	119	-6.30875	2.7503e-06	1e-05		9.5893e-05	2.7503e-06	1e-05	0.90702	0.99484	1
Nop53	120	-6.27063	2.7503e-06	1e-05		1.3546e-06	2.7503e-06	1e-05	1	1	1
Atp5a1	121	-6.22612	2.7503e-06	1e-05		3.4288e-05	2.7503e-06	1e-05	0.99965	1	1
Mcl1	122	-6.20919	2.7503e-06	1e-05		9.595e-05	2.7503e-06	1e-05	0.97179	0.99966	1
Prpf38a	123	-6.17575	2.7503e-06	1e-05		2.7122e-05	2.7503e-06	1e-05	0.99438	1	1
Ftsj3	124	-6.16288	2.7503e-06	1e-05		4.5908e-05	2.7503e-06	1e-05	0.99986	1	1
Eif2s2	125	-6.13187	2.7503e-06	1e-05		9.5689e-05	2.7503e-06	1e-05	0.99539	1	1
Ncbp2	126	-6.11587	2.7503e-06	1e-05		0.00021669	2.7503e-06	1e-05	0.99055	0.99999	1
Abt1	127	-6.077	2.7503e-06	1e-05		5.4605e-05	2.7503e-06	1e-05	0.92746	0.99748	1
Mak16	128	-6.01638	2.7503e-06	1e-05		2.0793e-05	2.7503e-06	1e-05	0.99773	1	1
Rps27rt	129	-5.99719	2.7503e-06	1e-05		0.00015176	2.7503e-06	1e-05	0.062975	0.10067	1
Tars	130	-5.95331	2.7503e-06	1e-05		2.4437e-05	2.7503e-06	1e-05	0.0803	0.16652	1
Fbl	131	-5.9305	2.7503e-06	1e-05		4.6906e-06	2.7503e-06	1e-05	0.99334	1	1
Tbl3	132	-5.92837	2.7503e-06	1e-05		0.00029584	2.7503e-06	1e-05	0.99015	0.99999	1
Rrp7a	133	-5.92462	2.7503e-06	1e-05		0.00014776	2.7503e-06	1e-05	0.99805	1	1
Eif2b4	134	-5.86894	2.7503e-06	1e-05		2.8698e-05	2.7503e-06	1e-05	0.98947	0.99999	1
Nutf2-ps2	135	-5.86662	2.7503e-06	1e-05		3.1612e-05	2.7503e-06	1e-05	0.99674	1	1
Rbm25	136	-5.82563	2.7503e-06	1e-05		3.2592e-06	2.7503e-06	1e-05	0.99997	1	1
Thoc1	137	-5.80456	2.7503e-06	1e-05		0.00010502	2.7503e-06	1e-05	0.99481	1	1
Syk	138	-5.80194	2.7503e-06	1e-05		8.924e-06	2.7503e-06	1e-05	0.99999	1	1
Gnl3	139	-5.76825	2.7503e-06	1e-05		2.874e-06	2.7503e-06	1e-05	1	1	1
Cwc22	140	-5.7585	2.7503e-06	1e-05		8.2005e-05	2.7503e-06	1e-05	0.99311	1	1
Eif3c	141	-5.75644	2.7503e-06	1e-05		1.3825e-05	2.7503e-06	1e-05	0.39408	0.6876	1
Irf4	142	-5.746	2.7503e-06	1e-05		8.5539e-07	2.7503e-06	1e-05	1	1	1
Ddx19a	143	-5.70644	2.7503e-06	1e-05		0.00010257	2.7503e-06	1e-05	0.9999	1	1
Ddx49	144	-5.70075	2.7503e-06	1e-05		5.6401e-05	2.7503e-06	1e-05	0.92198	0.99714	1
Slu7	145	-5.67244	2.7503e-06	1e-05		2.1177e-05	2.7503e-06	1e-05	0.99968	1	1
Snrnp70	146	-5.64412	2.7503e-06	1e-05		2.1106e-05	2.7503e-06	1e-05	0.99995	1	1
Cdc5l	147	-5.62206	2.7503e-06	1e-05		7.7447e-07	2.7503e-06	1e-05	1	1	1
Xab2	148	-5.6135	2.7503e-06	1e-05		4.4008e-06	2.7503e-06	1e-05	1	1	1
Lsm3	149	-5.613	2.7503e-06	1e-05		6.7292e-07	2.7503e-06	1e-05	0.99987	1	1
Ddx51	150	-5.60944	2.7503e-06	1e-05		1.6579e-05	2.7503e-06	1e-05	0.74753	0.95966	1
Dnttip2	151	-5.60256	2.7503e-06	1e-05		3.0069e-05	2.7503e-06	1e-05	0.99997	1	1
Wdr75	152	-5.56725	2.7503e-06	1e-05		0.00035688	2.7503e-06	1e-05	0.098686	0.1989	1
Ruvbl1	153	-5.56538	2.7503e-06	1e-05		0.0003052	2.7503e-06	1e-05	0.96031	0.99938	1
Noc2l	154	-5.55781	2.7503e-06	1e-05		0.00028591	2.7503e-06	1e-05	0.99907	1	1
Hnrnpl	155	-5.514	2.7503e-06	1e-05		0.0045583	2.7503e-06	1e-05	0.94242	0.99845	1
Prpf31	156	-5.50525	2.7503e-06	1e-05		0.00011397	2.7503e-06	1e-05	0.99873	1	1
Nup155	157	-5.50481	2.7503e-06	1e-05		0.00023727	2.7503e-06	1e-05	0.99689	1	1
Atp1a1	158	-5.48756	2.7503e-06	1e-05		1.0693e-05	2.7503e-06	1e-05	0.99999	1	1
Nmd3	159	-5.48344	2.7503e-06	1e-05		0.00096101	2.7503e-06	1e-05	0.83995	0.98151	1
Prpf40a	160	-5.44238	2.7503e-06	1e-05		0.00012871	2.7503e-06	1e-05	0.99914	1	1
Nop16	161	-5.43512	2.7503e-06	1e-05		1.1332e-05	2.7503e-06	1e-05	0.99999	1	1
Cebpz	162	-5.42475	2.7503e-06	1e-05		0.0002213	2.7503e-06	1e-05	0.98435	0.99995	1
Rrp36	163	-5.41838	2.7503e-06	1e-05		0.0062323	2.7503e-06	1e-05	0.26936	0.54617	1
Eif5b	164	-5.40375	2.7503e-06	1e-05		4.1541e-05	2.7503e-06	1e-05	0.99985	1	1
Rpf2	165	-5.36575	2.7503e-06	1e-05		5.9496e-07	2.7503e-06	1e-05	1	1	1
Naca	166	-5.33744	2.7503e-06	1e-05		1.7322e-06	2.7503e-06	1e-05	1	1	1
Bop1	167	-5.29637	2.7503e-06	1e-05		0.00032231	2.7503e-06	1e-05	0.9984	1	1
Ddx55	168	-5.28337	2.7503e-06	1e-05		4.5238e-05	2.7503e-06	1e-05	0.45744	0.73946	1
Eif2b2	169	-5.27338	2.7503e-06	1e-05		0.0031661	2.7503e-06	1e-05	0.26742	0.55469	1
Rrp9	170	-5.2695	2.7503e-06	1e-05		2.0131e-05	2.7503e-06	1e-05	0.99998	1	1
Etf1	171	-5.23006	2.7503e-06	1e-05		6.4235e-08	2.7503e-06	1e-05	1	1	1
Thoc3	172	-5.21263	2.7503e-06	1e-05		5.6256e-05	2.7503e-06	1e-05	0.99994	1	1
Rpn1	173	-5.21194	2.7503e-06	1e-05		6.9219e-05	2.7503e-06	1e-05	0.99975	1	1
Ebna1bp2	174	-5.18825	2.7503e-06	1e-05		0.00018896	2.7503e-06	1e-05	0.99389	1	1
Tra2b	175	-5.10994	2.7503e-06	1e-05		0.0020065	2.7503e-06	1e-05	0.99869	1	1
Emg1	176	-5.10769	2.7503e-06	1e-05		0.001297	2.7503e-06	1e-05	0.25044	0.53492	1
Cnot1	177	-5.10444	2.7503e-06	1e-05		1.4838e-06	2.7503e-06	1e-05	1	1	1
Supt16	178	-5.06513	2.7503e-06	1e-05		3.3813e-06	2.7503e-06	1e-05	0.98532	0.99996	1
Dgcr14	179	-5.06038	2.7503e-06	1e-05		0.0009572	2.7503e-06	1e-05	0.99904	1	1
Rnpc3	180	-5.04456	2.7503e-06	1e-05		0.00011247	2.7503e-06	1e-05	0.96665	0.99949	1
Pes1	181	-5.04306	2.7503e-06	1e-05		0.00048438	2.7503e-06	1e-05	0.63786	0.91318	1
Adar	182	-5.03862	2.7503e-06	1e-05		0.0001034	2.7503e-06	1e-05	0.99848	1	1
Dhx33	183	-5.03469	2.7503e-06	1e-05		5.8916e-05	2.7503e-06	1e-05	0.99226	1	1
Eif3d	184	-5.02781	2.7503e-06	1e-05		0.00086906	2.7503e-06	1e-05	0.96129	0.99939	1
Gm21312	185	-4.99788	2.7503e-06	1e-05		0.0038354	2.7503e-06	1e-05	0.96519	0.99948	1
Nop56	186	-4.98331	2.7503e-06	1e-05		0.00034821	2.7503e-06	1e-05	0.99959	1	1
Ruvbl2	187	-4.945	2.7503e-06	1e-05		0.00020706	2.7503e-06	1e-05	0.99979	1	1
Smu1	188	-4.92981	2.7503e-06	1e-05		0.00053994	2.7503e-06	1e-05	0.87126	0.98886	1
Exosc4	189	-4.91562	2.7503e-06	1e-05		1.43e-05	2.7503e-06	1e-05	0.67655	0.92733	1
Ddx23	190	-4.8985	2.7503e-06	1e-05		2.1137e-06	2.7503e-06	1e-05	1	1	1
Dhx38	191	-4.89725	2.7503e-06	1e-05		0.00044469	2.7503e-06	1e-05	0.99956	1	1
Ubtf	192	-4.88844	2.7503e-06	1e-05		2.9042e-05	2.7503e-06	1e-05	0.99767	1	1
Mphosph10	193	-4.88712	2.7503e-06	1e-05		5.997e-05	2.7503e-06	1e-05	0.99892	1	1
Hist1h1e	194	-4.87362	2.7503e-06	1e-05		0.011001	2.7503e-06	1e-05	0.46593	0.75088	1
Gpkow	195	-4.86269	2.7503e-06	1e-05		7.9969e-05	2.7503e-06	1e-05	0.99968	1	1
Rsl1d1	196	-4.85437	2.7503e-06	1e-05		0.0005533	2.7503e-06	1e-05	0.11807	0.23037	1
Sumo2	197	-4.85044	2.7503e-06	1e-05		2.5788e-05	2.7503e-06	1e-05	0.99951	1	1
Ddx10	198	-4.80231	2.7503e-06	1e-05		0.00078834	2.7503e-06	1e-05	0.36957	0.66605	1
Eprs	199	-4.77513	2.7503e-06	1e-05		0.00063188	2.7503e-06	1e-05	0.99865	1	1
Ddx56	200	-4.76081	2.7503e-06	1e-05		0.0032913	2.7503e-06	1e-05	0.9987	1	1
Exosc2	201	-4.73431	2.7503e-06	1e-05		3.1562e-05	2.7503e-06	1e-05	0.98412	0.99995	1
Bcas2	202	-4.72425	2.7503e-06	1e-05		0.0038666	2.7503e-06	1e-05	0.51632	0.83625	1
Nmt1	203	-4.71894	2.7503e-06	1e-05		0.0012856	2.7503e-06	1e-05	0.82091	0.97977	1
Sec61a1	204	-4.71194	2.7503e-06	1e-05		6.3182e-05	2.7503e-06	1e-05	0.99501	1	1
Rtf1	205	-4.68906	2.7503e-06	1e-05		0.00024595	2.7503e-06	1e-05	0.99954	1	1
Rbm42	206	-4.66694	2.7503e-06	1e-05		0.00017131	2.7503e-06	1e-05	0.99967	1	1
Alyref	207	-4.65238	2.7503e-06	1e-05		0.0016009	2.7503e-06	1e-05	0.26574	0.55469	1
Hnrnpf	208	-4.63656	2.7503e-06	1e-05		0.00055497	2.7503e-06	1e-05	0.96777	0.99953	1
Yars2	209	-4.63069	2.7503e-06	1e-05		0.009142	2.7503e-06	1e-05	0.85766	0.98603	1
Nol10	210	-4.6235	2.7503e-06	1e-05		0.0062917	2.7503e-06	1e-05	0.39029	0.68062	1
Exosc9	211	-4.61319	2.7503e-06	1e-05		0.00042086	2.7503e-06	1e-05	0.82326	0.9804	1
Eif2b5	212	-4.60137	2.7503e-06	1e-05		0.00058317	2.7503e-06	1e-05	0.9987	1	1
Rrp12	213	-4.59394	2.7503e-06	1e-05		2.2567e-06	2.7503e-06	1e-05	1	1	1
Ipo7	214	-4.54419	2.7503e-06	1e-05		5.3288e-05	2.7503e-06	1e-05	0.98825	0.99998	1
Exosc5	215	-4.52494	2.7503e-06	1e-05		0.00020891	2.7503e-06	1e-05	0.99945	1	1
Pwp2	216	-4.50169	2.7503e-06	1e-05		0.0014626	2.7503e-06	1e-05	0.98854	0.99998	1
Sec61b	217	-4.47794	2.7503e-06	1e-05		0.0011351	2.7503e-06	1e-05	0.36021	0.66605	1
Snip1	218	-4.45944	2.7503e-06	1e-05		0.00016995	2.7503e-06	1e-05	0.99983	1	1
Pno1	219	-4.455	2.7503e-06	1e-05		0.0036391	2.7503e-06	1e-05	0.13901	0.29104	1
Supt6	220	-4.45012	2.7503e-06	1e-05		0.0011624	2.7503e-06	1e-05	0.99628	1	1
Abcf1	221	-4.43013	2.7503e-06	1e-05		0.007506	2.7503e-06	1e-05	0.051733	0.084282	1
Plrg1	222	-4.4085	2.7503e-06	1e-05		0.0093216	2.7503e-06	1e-05	0.79617	0.97309	1
Dync1h1	223	-4.40775	2.7503e-06	1e-05		4.3224e-05	2.7503e-06	1e-05	0.99993	1	1
Rbm28	224	-4.40769	2.7503e-06	1e-05		0.00037779	2.7503e-06	1e-05	0.99654	1	1
Cnot3	225	-4.36325	2.7503e-06	1e-05		0.0010949	2.7503e-06	1e-05	0.95834	0.9993	1
Cpsf3	226	-4.33956	2.7503e-06	1e-05		2.4531e-05	2.7503e-06	1e-05	0.99998	1	1
Ddx21	227	-4.33444	2.7503e-06	1e-05		2.3827e-05	2.7503e-06	1e-05	0.9804	0.99989	1
Utp3	228	-4.32619	2.7503e-06	1e-05		0.00055917	2.7503e-06	1e-05	0.87823	0.99038	1
Pcf11	229	-4.30406	2.7503e-06	1e-05		7.6468e-05	2.7503e-06	1e-05	0.98	0.99988	1
Mybbp1a	230	-4.30131	2.7503e-06	1e-05		0.00066862	2.7503e-06	1e-05	0.94832	0.99895	1
Eif5	231	-4.26938	2.7503e-06	1e-05		0.0003535	2.7503e-06	1e-05	0.97777	0.99986	1
Ncl	232	-4.22631	2.7503e-06	1e-05		0.00036755	2.7503e-06	1e-05	0.30301	0.60038	1
Gspt1	233	-4.22544	2.7503e-06	1e-05		0.00070009	2.7503e-06	1e-05	0.81869	0.97852	1
Urb2	234	-4.225	2.7503e-06	1e-05		5.7828e-05	2.7503e-06	1e-05	0.99994	1	1
Rps19bp1	235	-4.21331	2.7503e-06	1e-05		0.008747	2.7503e-06	1e-05	0.053145	0.084282	1
Eif3e	236	-4.19219	2.7503e-06	1e-05		0.00058092	2.7503e-06	1e-05	0.98517	0.99996	1
Mfap1b	237	-4.1385	2.7503e-06	1e-05		1.4504e-05	2.7503e-06	1e-05	0.99999	1	1
Wdr46	238	-4.13694	2.7503e-06	1e-05		0.00018741	2.7503e-06	1e-05	0.86114	0.98644	1
Cpsf2	239	-4.13331	2.7503e-06	1e-05		1.594e-05	2.7503e-06	1e-05	0.99998	1	1
Kars	240	-4.13044	2.7503e-06	1e-05		0.00030187	2.7503e-06	1e-05	0.9997	1	1
Wbp11	241	-4.11494	2.7503e-06	1e-05		0.001355	2.7503e-06	1e-05	0.85559	0.98513	1
Eif1ad	242	-4.09406	2.7503e-06	1e-05		0.005205	2.7503e-06	1e-05	0.6215	0.90644	1
Oxsr1	243	-4.08437	2.7503e-06	1e-05		0.00014056	2.7503e-06	1e-05	0.11873	0.23037	1
Cwc15	244	-4.06431	2.7503e-06	1e-05		3.4863e-05	2.7503e-06	1e-05	0.97827	0.99986	1
Fam50a	245	-4.03419	2.7503e-06	1e-05		0.0021571	2.7503e-06	1e-05	0.96987	0.99963	1
Ddx18	246	-4.03313	2.7503e-06	1e-05		3.0453e-05	2.7503e-06	1e-05	0.99995	1	1
Snrpf	247	-4.0225	2.7503e-06	1e-05		1.2033e-05	2.7503e-06	1e-05	0.98455	0.99995	1
Cpsf1	248	-4.01231	2.7503e-06	1e-05		0.0054201	2.7503e-06	1e-05	0.020191	0.051988	1
Prpf38b	249	-3.99412	2.7503e-06	1e-05		0.0014867	2.7503e-06	1e-05	0.35023	0.65818	1
Cpsf6	250	-3.98237	2.7503e-06	1e-05		0.00016231	2.7503e-06	1e-05	0.99984	1	1
Ssrp1	251	-3.96906	2.7503e-06	1e-05		0.00027072	2.7503e-06	1e-05	0.99973	1	1
Upf1	252	-3.93131	2.7503e-06	1e-05		0.0020788	2.7503e-06	1e-05	0.95817	0.99929	1
Cpsf4	253	-3.9255	2.7503e-06	1e-05		9.9563e-05	2.7503e-06	1e-05	0.9999	1	1
Eif2b3	254	-3.868	2.7503e-06	1e-05		0.0011276	2.7503e-06	1e-05	0.12925	0.27669	1
Polr2f	255	-3.86475	2.7503e-06	1e-05		0.0034075	2.7503e-06	1e-05	0.41086	0.6876	1
Tnpo3	256	-3.85938	2.7503e-06	1e-05		0.00031646	2.7503e-06	1e-05	0.97435	0.99977	1
Rae1	257	-3.857	2.7503e-06	1e-05		0.00024885	2.7503e-06	1e-05	0.98296	0.99994	1
Ddx3x	258	-3.85219	2.7503e-06	1e-05		0.00080744	2.7503e-06	1e-05	0.73435	0.95495	1
Aqr	259	-3.81094	2.7503e-06	1e-05		0.00059053	2.7503e-06	1e-05	0.97942	0.99987	1
Sdad1	260	-3.80525	2.7503e-06	1e-05		0.001532	2.7503e-06	1e-05	0.94931	0.99896	1
Utp18	261	-3.79206	2.7503e-06	1e-05		0.00016318	2.7503e-06	1e-05	0.99984	1	1
Aatf	262	-3.76838	2.7503e-06	1e-05		0.00060634	2.7503e-06	1e-05	0.96316	0.99942	1
Tpr	263	-3.74544	2.7503e-06	1e-05		0.00033058	2.7503e-06	1e-05	0.43436	0.70836	1
Cdk11b	264	-3.73244	2.7503e-06	1e-05		4.6472e-05	2.7503e-06	1e-05	0.99995	1	1
Rrp1	265	-3.72719	2.7503e-06	1e-05		0.000223	2.7503e-06	1e-05	0.99978	1	1
Nifk	266	-3.72369	2.7503e-06	1e-05		0.0010791	2.7503e-06	1e-05	0.98534	0.99996	1
Eif5a	267	-3.71587	2.7503e-06	1e-05		0.0026424	2.7503e-06	1e-05	0.94931	0.99896	1
Nol11	268	-3.707	2.7503e-06	1e-05		4.5286e-05	2.7503e-06	1e-05	0.8789	0.99038	1
Rngtt	269	-3.67206	2.7503e-06	1e-05		0.00015646	2.7503e-06	1e-05	0.85364	0.9847	1
Fip1l1	270	-3.67037	2.7503e-06	1e-05		0.00070721	2.7503e-06	1e-05	0.98992	0.99999	1
Spout1	271	-3.66569	2.7503e-06	1e-05		0.00074035	2.7503e-06	1e-05	0.99398	1	1
Ik	272	-3.65187	2.7503e-06	1e-05		0.0012955	2.7503e-06	1e-05	0.98679	0.99997	1
Eif3m	273	-3.64569	2.7503e-06	1e-05		0.00010031	2.7503e-06	1e-05	0.9999	1	1
Sfswap	274	-3.63987	2.7503e-06	1e-05		0.0084683	2.7503e-06	1e-05	0.070634	0.15002	1
Bms1	275	-3.6265	2.7503e-06	1e-05		0.0090404	2.7503e-06	1e-05	0.766	0.96603	1
Nxf1	276	-3.6195	2.7503e-06	1e-05		0.0035399	2.7503e-06	1e-05	0.99681	1	1
Eef1g	277	-3.60894	2.7503e-06	1e-05		0.00077674	2.7503e-06	1e-05	0.81164	0.97788	1
Nat10	278	-3.54612	2.7503e-06	1e-05		9.3003e-06	2.7503e-06	1e-05	0.99604	1	1
Mbnl1	279	-3.53238	2.7503e-06	1e-05		0.0095772	2.7503e-06	1e-05	0.9954	1	1
Ubc	280	-3.52181	2.7503e-06	1e-05		0.00016667	2.7503e-06	1e-05	0.57456	0.87783	1
Isg20l2	281	-3.5095	2.7503e-06	1e-05		0.0045772	2.7503e-06	1e-05	0.95648	0.99927	1
Cdc40	282	-3.413	2.7503e-06	1e-05		0.0020197	2.7503e-06	1e-05	0.12794	0.26152	1
Pum3	283	-3.40169	2.7503e-06	1e-05		0.006391	2.7503e-06	1e-05	0.98647	0.99997	1
Zcchc9	284	-3.39887	2.7503e-06	1e-05		0.00081518	2.7503e-06	1e-05	0.99759	1	1
Rps25	285	-3.39525	2.7503e-06	1e-05		0.00089829	2.7503e-06	1e-05	0.36761	0.66605	1
Rrp15	286	-3.36219	2.7503e-06	1e-05		0.00083652	2.7503e-06	1e-05	0.59701	0.8966	1
Bud13	287	-3.33181	2.7503e-06	1e-05		0.0020945	2.7503e-06	1e-05	0.0040678	0.018886	1
Sart1	288	-3.31287	2.7503e-06	1e-05		0.00031078	2.7503e-06	1e-05	0.98473	0.99996	1
Prpf18	289	-3.29144	2.7503e-06	1e-05		0.00040989	2.7503e-06	1e-05	0.99891	1	1
Gar1	290	-3.2905	2.7503e-06	1e-05		0.0010047	2.7503e-06	1e-05	0.93247	0.99794	1
Kpna2	291	-3.26669	2.7503e-06	1e-05		0.00010928	2.7503e-06	1e-05	0.99448	1	1
Eif1	292	-3.24	2.7503e-06	1e-05		0.001759	2.7503e-06	1e-05	0.57181	0.87782	1
Ppp1r10	293	-3.22931	2.7503e-06	1e-05		0.0005587	2.7503e-06	1e-05	0.99944	1	1
Rnps1	294	-3.21206	2.7503e-06	1e-05		0.00060299	2.7503e-06	1e-05	0.99863	1	1
Rars	295	-3.2115	2.7503e-06	1e-05		0.00017466	2.7503e-06	1e-05	0.98031	0.99989	1
Dbr1	296	-3.18606	2.7503e-06	1e-05		0.00016787	2.7503e-06	1e-05	0.99983	1	1
Gnl3l	297	-3.17388	2.7503e-06	1e-05		0.00020457	2.7503e-06	1e-05	0.9998	1	1
Nop2	298	-3.14544	2.7503e-06	1e-05		0.00040962	2.7503e-06	1e-05	0.95142	0.99903	1
Ppie	299	-3.14369	2.7503e-06	1e-05		0.0016371	2.7503e-06	1e-05	0.98578	0.99996	1
Ipo13	300	-3.13488	2.7503e-06	1e-05		0.00059479	2.7503e-06	1e-05	0.94162	0.99841	1
Grwd1	301	-3.121	2.7503e-06	1e-05		0.00355	2.7503e-06	1e-05	0.99755	1	1
Utp15	302	-3.10662	2.7503e-06	1e-05		6.0045e-05	2.7503e-06	1e-05	0.84707	0.98331	1
Las1l	303	-3.09475	2.7503e-06	1e-05		0.0057401	2.7503e-06	1e-05	0.40299	0.6876	1
Eif4g2	304	-3.09269	2.7503e-06	1e-05		9.7364e-05	2.7503e-06	1e-05	0.9892	0.99998	1
Polr2a	305	-3.07469	2.7503e-06	1e-05		0.00030237	2.7503e-06	1e-05	0.61244	0.89913	1
Ppwd1	306	-3.04813	2.7503e-06	1e-05		0.0011085	2.7503e-06	1e-05	0.51786	0.8444	1
Sart3	307	-3.04588	2.7503e-06	1e-05		0.0018391	2.7503e-06	1e-05	0.88272	0.99098	1
Dimt1	308	-3.03219	2.7503e-06	1e-05		0.0050724	2.7503e-06	1e-05	0.91982	0.99713	1
Utp6	309	-3.00362	2.7503e-06	1e-05		5.5048e-05	2.7503e-06	1e-05	0.99994	1	1
Gm6763	310	-2.99487	2.7503e-06	1e-05		0.00086343	2.7503e-06	1e-05	0.87978	0.99066	1
Nol7	311	-2.99194	2.7503e-06	1e-05		0.018056	2.7503e-06	1e-05	0.74321	0.95857	1
Ppil4	312	-2.98588	2.7503e-06	1e-05		0.012937	2.7503e-06	1e-05	0.051027	0.084282	1
Nol6	313	-2.98262	2.7503e-06	1e-05		0.00024498	2.7503e-06	1e-05	0.99976	1	1
Thoc2	314	-2.96675	2.7503e-06	1e-05		2.8996e-05	2.7503e-06	1e-05	0.88882	0.9918	1
Tfip11	315	-2.96437	2.7503e-06	1e-05		0.0026061	2.7503e-06	1e-05	0.99191	1	1
Supt4a	316	-2.95306	2.7503e-06	1e-05		0.000339	2.7503e-06	1e-05	0.99966	1	1
Gm4307	317	-2.94906	2.7503e-06	1e-05		0.00011595	2.7503e-06	1e-05	0.99925	1	1
Hist1h4a	318	-2.93569	2.7503e-06	1e-05		6.6224e-06	2.7503e-06	1e-05	0.99999	1	1
Rbbp6	319	-2.91469	2.7503e-06	1e-05		8.2698e-06	2.7503e-06	1e-05	0.99999	1	1
Ppp1r8	320	-2.88525	2.7503e-06	1e-05		0.0013493	2.7503e-06	1e-05	0.97753	0.99986	1
Gm4305	321	-2.87025	2.7503e-06	1e-05		0.016269	2.7503e-06	1e-05	0.98655	0.99997	1
Rpf1	322	-2.86594	2.7503e-06	1e-05		0.00087028	2.7503e-06	1e-05	0.98461	0.99995	1
Rbm39	323	-2.857	2.7503e-06	1e-05		6.753e-06	2.7503e-06	1e-05	0.99999	1	1
Xrn2	324	-2.83994	2.7503e-06	1e-05		0.0058746	2.7503e-06	1e-05	0.18267	0.39936	1
Zfp207	325	-2.83125	2.7503e-06	1e-05		0.00098338	2.7503e-06	1e-05	0.98419	0.99995	1
Dcaf13	326	-2.82112	2.7503e-06	1e-05		0.0018613	2.7503e-06	1e-05	0.99103	0.99999	1
Rictor	327	-2.80863	2.7503e-06	1e-05		0.00034154	2.7503e-06	1e-05	0.99734	1	1
Slc25a3	328	-2.79675	2.7503e-06	1e-05		6.3698e-05	2.7503e-06	1e-05	0.99956	1	1
Gm20765	329	-2.79481	2.7503e-06	1e-05		0.012877	2.7503e-06	1e-05	0.91643	0.99702	1
Nup98	330	-2.7925	2.7503e-06	1e-05		3.5184e-06	2.7503e-06	1e-05	1	1	1
Supv3l1	331	-2.75769	2.7503e-06	1e-05		0.00082211	2.7503e-06	1e-05	0.99897	1	1
Txn1	332	-2.74731	2.7503e-06	1e-05		0.023981	2.7503e-06	1e-05	0.30941	0.60945	1
Idh3a	333	-2.74437	2.7503e-06	1e-05		0.0046844	2.7503e-06	1e-05	0.90455	0.99467	1
Sympk	334	-2.73619	2.7503e-06	1e-05		0.00046562	2.7503e-06	1e-05	0.91909	0.99713	1
Pdcd11	335	-2.72281	2.7503e-06	1e-05		0.00065571	2.7503e-06	1e-05	0.99934	1	1
Diexf	336	-2.71338	2.7503e-06	1e-05		0.0034962	2.7503e-06	1e-05	0.29979	0.58259	1
Ddx20	337	-2.7075	2.7503e-06	1e-05		0.0046001	2.7503e-06	1e-05	0.88315	0.99098	1
Exosc8	338	-2.70144	2.7503e-06	1e-05		0.0017013	2.7503e-06	1e-05	0.97385	0.99975	1
Ap2m1	339	-2.69237	2.7503e-06	1e-05		0.0016086	2.7503e-06	1e-05	0.34417	0.65059	1
Wdr3	340	-2.69194	2.7503e-06	1e-05		0.016353	2.7503e-06	1e-05	0.64783	0.91756	1
Srfbp1	341	-2.67238	2.7503e-06	1e-05		0.0057467	2.7503e-06	1e-05	0.96181	0.99939	1
Wdr36	342	-2.65531	2.7503e-06	1e-05		0.011031	2.7503e-06	1e-05	0.84978	0.98383	1
Cherp	343	-2.645	2.7503e-06	1e-05		0.00014007	2.7503e-06	1e-05	0.99986	1	1
Ssu72	344	-2.64469	2.7503e-06	1e-05		0.020454	2.7503e-06	1e-05	0.79916	0.9738	1
Gemin5	345	-2.628	2.7503e-06	1e-05		0.00099711	2.7503e-06	1e-05	0.82357	0.9804	1
Cstf3	346	-2.60619	2.7503e-06	1e-05		1.0619e-05	2.7503e-06	1e-05	0.99999	1	1
Usp36	347	-2.57756	2.7503e-06	1e-05		3.0739e-05	2.7503e-06	1e-05	0.99997	1	1
Tut1	348	-2.53144	2.7503e-06	1e-05		7.5505e-05	2.7503e-06	1e-05	0.99954	1	1
Dhx9	349	-2.52775	2.7503e-06	1e-05		0.00057226	2.7503e-06	1e-05	0.93148	0.99764	1
Pcid2	350	-2.52481	2.7503e-06	1e-05		0.0057173	2.7503e-06	1e-05	0.93874	0.9983	1
Ddx46	351	-2.51394	2.7503e-06	1e-05		0.010114	2.7503e-06	1e-05	0.93332	0.99783	1
Spcs2	352	-2.50481	2.7503e-06	1e-05		0.02177	2.7503e-06	1e-05	0.46255	0.73947	1
Zc3h18	353	-2.49381	2.7503e-06	1e-05		0.0075415	2.7503e-06	1e-05	0.20525	0.45957	1
Thoc5	354	-2.493	2.7503e-06	1e-05		0.0086552	2.7503e-06	1e-05	0.70488	0.94099	1
Snw1	355	-2.49275	2.7503e-06	1e-05		0.00034208	2.7503e-06	1e-05	0.99966	1	1
Pde12	356	-2.48025	2.7503e-06	1e-05		0.0002014	2.7503e-06	1e-05	0.9998	1	1
Ccdc59	357	-2.47681	2.7503e-06	1e-05		0.0011733	2.7503e-06	1e-05	0.99624	1	1
Ythdc1	358	-2.47556	2.7503e-06	1e-05		0.0086065	2.7503e-06	1e-05	0.88326	0.99098	1
Dhx16	359	-2.415	2.7503e-06	1e-05		0.019685	2.7503e-06	1e-05	0.98378	0.99995	1
Ptbp1	360	-2.41088	2.7503e-06	1e-05		0.00020001	2.7503e-06	1e-05	0.9998	1	1
Dis3	361	-2.40281	2.7503e-06	1e-05		0.00014544	2.7503e-06	1e-05	0.99981	1	1
Cactin	362	-2.39356	2.7503e-06	1e-05		0.02786	2.7503e-06	1e-05	0.95408	0.99917	1
Brix1	363	-2.35156	2.7503e-06	1e-05		0.011293	2.7503e-06	1e-05	0.2971	0.58259	1
Surf6	364	-2.3095	2.7503e-06	1e-05		1.3894e-05	2.7503e-06	1e-05	0.99999	1	1
Ppil1	365	-2.21913	2.7503e-06	1e-05		0.00081227	2.7503e-06	1e-05	0.99193	1	1
Nop14	366	-2.20756	2.7503e-06	1e-05		0.0058632	2.7503e-06	1e-05	0.98347	0.99994	1
Rbm48	367	-2.20131	2.7503e-06	1e-05		0.0092414	2.7503e-06	1e-05	0.9591	0.99934	1
Gm8764	368	-2.19656	2.7503e-06	1e-05		0.0013968	2.7503e-06	1e-05	0.98349	0.99994	1
Rbm17	369	-2.19406	2.7503e-06	1e-05		0.019481	2.7503e-06	1e-05	0.99283	1	1
Bard1	370	-2.18531	2.7503e-06	1e-05		0.0013182	2.7503e-06	1e-05	0.94482	0.99867	1
Htatsf1	371	-2.17806	2.7503e-06	1e-05		0.00025747	2.7503e-06	1e-05	0.055963	0.10066	1
Ago2	372	-2.17437	2.7503e-06	1e-05		0.00028568	2.7503e-06	1e-05	0.99971	1	1
Utp20	373	-2.17131	2.7503e-06	1e-05		0.0043414	2.7503e-06	1e-05	0.64376	0.91541	1
Eif4g1	374	-2.16588	2.7503e-06	1e-05		0.00010943	2.7503e-06	1e-05	0.99989	1	1
Lsm6	375	-2.13987	2.7503e-06	1e-05		0.0021331	2.7503e-06	1e-05	0.9951	1	1
Cnot2	376	-2.11544	2.7503e-06	1e-05		0.0060139	2.7503e-06	1e-05	0.9907	0.99999	1
Exosc3	377	-2.109	2.7503e-06	1e-05		0.00065068	2.7503e-06	1e-05	0.99935	1	1
Srsf7	378	-2.07862	2.7503e-06	1e-05		0.031016	2.7503e-06	1e-05	0.80297	0.97524	1
Urb1	379	-2.05425	2.7503e-06	1e-05		0.0019587	2.7503e-06	1e-05	0.6946	0.92921	1
Hist1h2bp	380	-2.04875	2.7503e-06	1e-05		0.00012017	2.7503e-06	1e-05	0.99988	1	1
Wnk1	381	-2.04313	2.7503e-06	1e-05		0.01028	2.7503e-06	1e-05	0.089875	0.18273	1
Ybx1	382	-2.03994	2.7503e-06	1e-05		0.0076256	2.7503e-06	1e-05	0.95089	0.99902	1
Ngdn	383	-1.99775	1.3751e-05	4.8e-05		0.054988	1.3751e-05	4.8e-05	0.055259	0.10066	1
Gm21293	384	-1.984	2.7503e-06	1e-05		0.0047199	2.7503e-06	1e-05	0.92725	0.99748	1
Kri1	385	-1.97481	2.7503e-06	1e-05		0.025646	2.7503e-06	1e-05	0.92584	0.99714	1
Brd2	386	-1.91987	2.7503e-06	1e-05		0.003073	2.7503e-06	1e-05	0.52738	0.84791	1
Tma16	387	-1.89869	2.7503e-06	1e-05		0.023338	2.7503e-06	1e-05	0.99125	0.99999	1
Hspd1	388	-1.89444	2.7503e-06	1e-05		0.00045433	2.7503e-06	1e-05	0.99071	0.99999	1
Srrt	389	-1.88494	2.7503e-06	1e-05		0.016944	2.7503e-06	1e-05	0.34214	0.65058	1
Eif2b1	390	-1.86056	2.7503e-06	1e-05		0.0049371	2.7503e-06	1e-05	0.98858	0.99998	1
Hnrnpc	391	-1.85794	2.7503e-06	1e-05		0.0011236	2.7503e-06	1e-05	0.95229	0.99914	1
Gm4340	392	-1.85638	2.7503e-06	1e-05		0.00012832	2.7503e-06	1e-05	0.99987	1	1
Ewsr1	393	-1.852	2.7503e-06	1e-05		0.0042427	2.7503e-06	1e-05	0.75557	0.96497	1
Khdc1b	394	-1.8485	2.7503e-06	1e-05		2.2214e-05	2.7503e-06	1e-05	0.58138	0.88359	1
Nhp2	395	-1.84344	2.7503e-06	1e-05		0.00089781	2.7503e-06	1e-05	0.9991	1	1
Gm21304	396	-1.83787	2.7503e-06	1e-05		0.0055595	2.7503e-06	1e-05	0.97808	0.99986	1
Drosha	397	-1.79169	2.7503e-06	1e-05		0.008954	2.7503e-06	1e-05	0.35674	0.66605	1
Tcof1	398	-1.78169	2.7503e-06	1e-05		0.00014403	2.7503e-06	1e-05	0.99986	1	1
Smn1	399	-1.78169	1.3751e-05	4.8e-05		0.069925	1.3751e-05	4.8e-05	0.84991	0.98383	1
Ndufa9	400	-1.77575	2.7503e-06	1e-05		0.0045195	2.7503e-06	1e-05	0.77593	0.96986	1
Npm1	401	-1.73725	2.7503e-06	1e-05		0.0036086	2.7503e-06	1e-05	0.99521	1	1
Rela	402	-1.73638	2.7503e-06	1e-05		0.036155	2.7503e-06	1e-05	0.97147	0.99966	1
H2afx	403	-1.73412	2.7503e-06	1e-05		0.0088843	2.7503e-06	1e-05	0.99661	1	1
Syf2	404	-1.71994	2.7503e-06	1e-05		0.024295	2.7503e-06	1e-05	0.56799	0.87463	1
Exosc10	405	-1.70869	2.7503e-06	1e-05		0.029165	2.7503e-06	1e-05	0.99825	1	1
Rbm19	406	-1.70806	2.7503e-06	1e-05		0.0023887	2.7503e-06	1e-05	0.98759	0.99998	1
Rbmxl1	407	-1.69825	2.7503e-06	1e-05		0.0013246	2.7503e-06	1e-05	0.97628	0.99981	1
Wdr61	408	-1.68569	1.3751e-05	4.8e-05		0.070313	1.3751e-05	4.8e-05	0.52662	0.84791	1
Pkm	409	-1.68263	2.7503e-06	1e-05		0.0291	2.7503e-06	1e-05	0.87989	0.99066	1
Atp2a2	410	-1.68175	2.7503e-06	1e-05		0.0006003	2.7503e-06	1e-05	0.9994	1	1
Cnot11	411	-1.6775	0.00012926	0.000422		0.13715	0.00012926	0.000422	0.63727	0.91318	1
Smg1	412	-1.66675	2.7503e-06	1e-05		0.0020851	2.7503e-06	1e-05	0.99885	1	1
Esf1	413	-1.66431	2.7503e-06	1e-05		0.0099202	2.7503e-06	1e-05	0.81385	0.97788	1
Tufm	414	-1.64319	2.7503e-06	1e-05		0.0030262	2.7503e-06	1e-05	0.18081	0.39936	1
Ssbp1	415	-1.642	2.7503e-06	1e-05		0.032927	2.7503e-06	1e-05	0.88984	0.99214	1
Naa38	416	-1.623	2.7503e-06	1e-05		0.00086857	2.7503e-06	1e-05	0.95509	0.99917	1
Wtap	417	-1.56375	2.7503e-06	1e-05		0.046105	2.7503e-06	1e-05	0.99466	1	1
Rptor	418	-1.55919	2.7503e-06	1e-05		0.0082826	2.7503e-06	1e-05	0.99469	1	1
Luc7l3	419	-1.5475	2.7503e-06	1e-05		0.012643	2.7503e-06	1e-05	0.52473	0.8479	1
Dnmt1	420	-1.53563	2.7503e-06	1e-05		0.011801	2.7503e-06	1e-05	0.97427	0.99976	1
Sf1	421	-1.52113	2.7503e-06	1e-05		0.0005853	2.7503e-06	1e-05	0.99854	1	1
Cnot8	422	-1.51869	2.7503e-06	1e-05		0.028479	2.7503e-06	1e-05	0.59603	0.8966	1
Pnn	423	-1.47287	2.7503e-06	1e-05		0.0089661	2.7503e-06	1e-05	0.067159	0.1337	1
Llph	424	-1.4695	2.7503e-06	1e-05		0.041904	2.7503e-06	1e-05	0.38792	0.68062	1
Snrpa	425	-1.44931	2.7503e-06	1e-05		0.025995	2.7503e-06	1e-05	0.94035	0.99841	1
Mrto4	426	-1.42831	1.3751e-05	4.8e-05		0.067513	1.3751e-05	4.8e-05	0.52016	0.8444	1
Ddx39b	427	-1.39931	2.7503e-06	1e-05		0.010301	2.7503e-06	1e-05	0.83664	0.98151	1
Thoc7	428	-1.39556	2.7503e-06	1e-05		0.0015317	2.7503e-06	1e-05	0.89666	0.99308	1
Gle1	429	-1.39512	2.7503e-06	1e-05		0.035227	2.7503e-06	1e-05	0.89988	0.9939	1
Rbmx2	430	-1.3815	2.7503e-06	1e-05		0.01156	2.7503e-06	1e-05	0.69281	0.92921	1
Edf1	431	-1.374	2.7503e-06	1e-05		0.043579	2.7503e-06	1e-05	0.78268	0.97083	1
Sdhc	432	-1.37281	2.7503e-06	1e-05		0.00031417	2.7503e-06	1e-05	0.99969	1	1
Cir1	433	-1.35694	8.2508e-06	3e-05		0.049871	8.2508e-06	3e-05	0.99741	1	1
Mrps27	434	-1.32519	2.7503e-06	1e-05		0.0061232	2.7503e-06	1e-05	0.99684	1	1
Mtrf1l	435	-1.30406	7.9758e-05	0.000267		0.11909	7.9758e-05	0.000267	0.15379	0.33358	1
Pnpt1	436	-1.30069	2.7503e-06	1e-05		0.00028806	2.7503e-06	1e-05	0.73142	0.95372	1
Akt1	437	-1.29481	2.7503e-06	1e-05		0.00020175	2.7503e-06	1e-05	0.9998	1	1
Smndc1	438	-1.2935	2.7503e-06	1e-05		0.018585	2.7503e-06	1e-05	0.45444	0.73334	1
Gm4303	439	-1.279	2.7503e-06	1e-05		0.028192	2.7503e-06	1e-05	0.94536	0.99875	1
Sap18	440	-1.24325	1.3751e-05	4.8e-05		0.053628	1.3751e-05	4.8e-05	0.73096	0.95372	1
Gm4312	441	-1.23344	2.7503e-06	1e-05		0.00055608	2.7503e-06	1e-05	0.99944	1	1
Polrmt	442	-1.21975	1.9252e-05	6.5e-05		0.082625	1.9252e-05	6.5e-05	0.63338	0.91317	1
Xpo5	443	-1.21944	2.7503e-06	1e-05		0.02193	2.7503e-06	1e-05	0.99575	1	1
Ilf2	444	-1.21481	5.2255e-05	0.000176		0.11135	5.2255e-05	0.000176	0.77928	0.97083	1
Cwf19l2	445	-1.2045	2.7503e-06	1e-05		0.012141	2.7503e-06	1e-05	0.68029	0.92733	1
Rbm33	446	-1.20037	2.7503e-06	1e-05		0.0032829	2.7503e-06	1e-05	0.76257	0.96498	1
Nvl	447	-1.19256	2.7503e-06	1e-05		0.00806	2.7503e-06	1e-05	0.96454	0.99948	1
Ldha	448	-1.18806	2.7503e-06	1e-05		0.00030702	2.7503e-06	1e-05	0.027441	0.051994	1
Ubap2l	449	-1.18606	0.00016777	0.000545		0.14908	0.00016777	0.000545	0.93293	0.99776	1
Mettl16	450	-1.18531	2.7503e-06	1e-05		0.0022464	2.7503e-06	1e-05	0.93454	0.9979	1
Skiv2l	451	-1.14181	2.7503e-06	1e-05		0.026833	2.7503e-06	1e-05	0.92718	0.99748	1
Zc3h3	452	-1.14106	1.9252e-05	6.5e-05		0.08362	1.9252e-05	6.5e-05	0.18452	0.4116	1
Pprc1	453	-1.13894	2.7503e-06	1e-05		0.033596	2.7503e-06	1e-05	0.99258	1	1
Mrpl44	454	-1.13725	2.7503e-06	1e-05		0.027926	2.7503e-06	1e-05	0.57679	0.87783	1
Nop9	455	-1.12956	1.9252e-05	6.5e-05		0.090955	1.9252e-05	6.5e-05	0.021645	0.051988	1
Ddx5	456	-1.12287	2.7503e-06	1e-05		0.034674	2.7503e-06	1e-05	0.94959	0.99896	1
Eloa	457	-1.12056	2.7503e-06	1e-05		0.0017556	2.7503e-06	1e-05	0.93759	0.99817	1
Ythdf2	458	-1.10519	2.7503e-06	1e-05		0.0013267	2.7503e-06	1e-05	0.94601	0.99885	1
Ywhae	459	-1.0795	2.7503e-06	1e-05		0.0067524	2.7503e-06	1e-05	0.82044	0.97914	1
Exosc1	460	-1.06337	2.7503e-06	1e-05		0.03442	2.7503e-06	1e-05	0.95413	0.99917	1
Rbm18	461	-1.06088	1.9252e-05	6.5e-05		0.095711	1.9252e-05	6.5e-05	0.35922	0.66605	1
Ireb2	462	-1.05431	2.7503e-06	1e-05		0.029069	2.7503e-06	1e-05	0.96844	0.99955	1
Ranbp2	463	-1.03287	2.7503e-06	1e-05		0.00016753	2.7503e-06	1e-05	0.96233	0.99941	1
Polr1e	464	-1.01819	2.7503e-06	1e-05		0.00022608	2.7503e-06	1e-05	0.99977	1	1
Eif4enif1	465	-1.01456	2.7503e-06	1e-05		0.004731	2.7503e-06	1e-05	0.95595	0.99925	1
Cflar	466	-1.01369	1.3751e-05	4.8e-05		0.074981	1.3751e-05	4.8e-05	0.81677	0.97789	1
Luc7l2	467	-1.01044	2.7503e-06	1e-05		0.029669	2.7503e-06	1e-05	0.93155	0.99764	1
Rpp30	468	-0.986375	2.7503e-06	1e-05		0.025995	2.7503e-06	1e-05	0.79404	0.97308	1
Tardbp	469	-0.977437	2.7503e-06	1e-05		0.020376	2.7503e-06	1e-05	0.79061	0.97233	1
Srrm2	470	-0.963625	0.00010176	0.000335		0.1333	0.00010176	0.000335	0.94191	0.99841	1
Nolc1	471	-0.956937	0.00029978	0.00096		0.18359	0.00029978	0.00096	0.9459	0.99884	1
Nomo1	472	-0.926562	0.00012926	0.000422		0.13652	0.00012926	0.000422	0.97626	0.9998	1
Gm8994	473	-0.908562	2.7503e-06	1e-05		0.035113	2.7503e-06	1e-05	0.5345	0.85154	1
Ssr1	474	-0.903125	8.5259e-05	0.000284		0.12188	8.5259e-05	0.000284	0.96308	0.99942	1
Zrsr1	475	-0.873938	9.626e-05	0.000318		0.12971	9.626e-05	0.000318	0.69306	0.92921	1
Gtf2f1	476	-0.872125	9.626e-05	0.000318		0.13247	9.626e-05	0.000318	0.43569	0.70836	1
Srrm1	477	-0.871437	2.7503e-06	1e-05		0.032337	2.7503e-06	1e-05	0.57798	0.87783	1
Huwe1	478	-0.86225	2.7503e-06	1e-05		0.035744	2.7503e-06	1e-05	0.10675	0.1989	1
Tubb4b	479	-0.854688	0.0004758	0.001489		0.23923	0.0004758	0.001489	0.55386	0.86176	1
Pabpc1l2b-ps	480	-0.854	2.7503e-06	1e-05		0.043362	2.7503e-06	1e-05	0.98646	0.99997	1
Api5	481	-0.848438	2.7503e-06	1e-05		0.010606	2.7503e-06	1e-05	0.81596	0.97789	1
Pelo	482	-0.835375	1.9252e-05	6.5e-05		0.10014	1.9252e-05	6.5e-05	0.94122	0.99841	1
Rtcb	483	-0.834375	2.7503e-06	1e-05		0.011985	2.7503e-06	1e-05	0.93698	0.99808	1
Hbs1l	484	-0.833937	0.00089384	0.002741		0.27794	0.00089384	0.002741	0.28706	0.58258	1
Denr	485	-0.818312	2.7503e-06	1e-05		0.0076682	2.7503e-06	1e-05	0.99599	1	1
Srpk1	486	-0.817688	1.3751e-05	4.8e-05		0.075675	1.3751e-05	4.8e-05	0.035361	0.067698	1
Polr2k	487	-0.796063	2.7503e-06	1e-05		0.047496	2.7503e-06	1e-05	0.47388	0.77798	1
Fadd	488	-0.7925	1.9252e-05	6.5e-05		0.10023	1.9252e-05	6.5e-05	0.26405	0.54486	1
Vps4b	489	-0.791812	1.3751e-05	4.8e-05		0.068931	1.3751e-05	4.8e-05	0.84693	0.98331	1
Rbm3	490	-0.769687	2.7503e-06	1e-05		0.039186	2.7503e-06	1e-05	0.82543	0.98041	1
Fus	491	-0.765938	2.7503e-06	1e-05		0.045442	2.7503e-06	1e-05	0.74484	0.95858	1
Ptcd3	492	-0.741437	0.00017327	0.000561		0.15401	0.00017327	0.000561	0.30888	0.60945	1
Sod2	493	-0.741062	1.9252e-05	6.5e-05		0.095218	1.9252e-05	6.5e-05	0.95905	0.99934	1
Cstf1	494	-0.739437	4.1254e-05	0.000139		0.11009	4.1254e-05	0.000139	0.96274	0.99941	1
Drg1	495	-0.727688	0.0020875	0.00611		0.35358	0.0020875	0.00611	0.35073	0.65818	1
Gm6793	496	-0.727313	1.9252e-05	6.5e-05		0.082651	1.9252e-05	6.5e-05	0.61338	0.89913	1
Eif3j2	497	-0.71	2.7503e-06	1e-05		0.046777	2.7503e-06	1e-05	0.84417	0.98214	1
Ddx42	498	-0.696125	0.0016089	0.004771		0.33203	0.0016089	0.004771	0.89599	0.99308	1
Ywhaz	499	-0.693937	0.00027778	0.000894		0.17404	0.00027778	0.000894	0.05385	0.084282	1
Map3k14	500	-0.6775	2.7503e-06	1e-05		0.02722	2.7503e-06	1e-05	0.90658	0.99484	1
Cnot9	501	-0.676187	8.5259e-05	0.000284		0.12255	8.5259e-05	0.000284	0.97571	0.99979	1
Ddx52	502	-0.662687	8.2508e-06	3e-05		0.049004	8.2508e-06	3e-05	0.032488	0.051994	1
Smg5	503	-0.65925	0.00031628	0.001008		0.19265	0.00031628	0.001008	0.92704	0.99748	1
Kin	504	-0.658188	9.626e-05	0.000318		0.13259	9.626e-05	0.000318	0.77292	0.96892	1
Eif3h	505	-0.634188	0.00061331	0.00189		0.26557	0.00061331	0.00189	0.31891	0.62663	1
Sec63	506	-0.632	0.00096535	0.00294		0.2851	0.00096535	0.00294	0.32777	0.62663	1
Hist1h1d	507	-0.597562	0.00095435	0.002917		0.28068	0.00095435	0.002917	0.70141	0.93778	1
Gm4302	508	-0.581644	1.9252e-05	6.5e-05		0.10431	1.9252e-05	6.5e-05	0.84788	0.98383	1
Cwc25	509	-0.567825	2.7503e-06	1e-05		0.029933	2.7503e-06	1e-05	0.5371	0.85154	1
Xpo6	510	-0.553725	1.9252e-05	6.5e-05		0.08642	1.9252e-05	6.5e-05	0.86233	0.98644	1
Elac2	511	-0.540975	5.7756e-05	0.000194		0.11307	5.7756e-05	0.000194	0.52889	0.84791	1
Alg13	512	-0.537687	2.7503e-06	1e-05		0.034638	2.7503e-06	1e-05	0.98292	0.99994	1
Drg2	513	-0.533681	0.0019059	0.005606		0.34823	0.0019059	0.005606	0.94665	0.99887	1
Tsfm	514	-0.523987	0.00013476	0.000439		0.14627	0.00013476	0.000439	0.093951	0.1989	1
Spen	515	-0.521081	0.0014989	0.004467		0.32559	0.0014989	0.004467	0.44883	0.72112	1
Eno1	516	-0.51305	1.9252e-05	6.5e-05		0.08422	1.9252e-05	6.5e-05	0.92634	0.99724	1
Wdr83	517	-0.504212	0.00012926	0.000422		0.13725	0.00012926	0.000422	0.98451	0.99995	1
Eif4b	518	-0.499931	2.7503e-06	1e-05		0.030127	2.7503e-06	1e-05	0.83809	0.98151	1
Xrcc6	519	-0.471825	0.00055831	0.001739		0.24883	0.00055831	0.001739	0.83104	0.9815	1
Eif3l	520	-0.4674	0.0004758	0.001489		0.2401	0.0004758	0.001489	0.79652	0.97309	1
Tbrg4	521	-0.462819	0.0010534	0.003192		0.3017	0.0010534	0.003192	0.80177	0.97524	1
Akap1	522	-0.462363	0.00016777	0.000545		0.15193	0.00016777	0.000545	0.97577	0.99979	1
Ddx19b	523	-0.462319	1.9252e-05	6.5e-05		0.079524	1.9252e-05	6.5e-05	0.84897	0.98383	1
Gpatch1	524	-0.440969	2.7503e-06	1e-05		0.023352	2.7503e-06	1e-05	0.9397	0.99835	1
Gapdh	525	-0.429787	2.7503e-06	1e-05		0.0025264	2.7503e-06	1e-05	0.96357	0.99942	1
Celf6	526	-0.422294	0.00018977	0.000613		0.16051	0.00018977	0.000613	0.41178	0.6876	1
Arl6ip4	527	-0.405775	0.0019114	0.005613		0.34877	0.0019114	0.005613	0.97813	0.99986	1
Matr3	528	-0.405075	1.9252e-05	6.5e-05		0.098285	1.9252e-05	6.5e-05	0.98309	0.99994	1
Stat3	529	-0.3997	8.2508e-06	3e-05		0.050673	8.2508e-06	3e-05	0.2184	0.49326	1
Hnrnpm	530	-0.396131	0.0004758	0.001489		0.23938	0.0004758	0.001489	0.40624	0.6876	1
Gm21992	531	-0.396025	0.002236	0.006502		0.3629	0.002236	0.006502	0.052439	0.084282	1
Arpc1b	532	-0.391362	0.0019004	0.005599		0.34699	0.0019004	0.005599	0.99145	0.99999	1
Zfp706	533	-0.380931	1.3751e-05	4.8e-05		0.07436	1.3751e-05	4.8e-05	0.22255	0.49326	1
Dynll1	534	-0.380138	0.0021975	0.006411		0.35716	0.0021975	0.006411	0.87185	0.98887	1
Manf	535	-0.376325	0.0014989	0.004467		0.32594	0.0014989	0.004467	0.7034	0.93941	1
Ccdc137	536	-0.364987	2.4752e-05	8.4e-05		0.1063	2.4752e-05	8.4e-05	0.98949	0.99999	1
Srbd1	537	-0.360362	0.0037761	0.010772		0.42774	0.0037761	0.010772	0.73881	0.95614	1
Surf2	538	-0.358862	9.0759e-05	0.000301		0.1279	9.0759e-05	0.000301	0.84638	0.98331	1
Ube2l3	539	-0.358	7.4257e-05	0.000249		0.11754	7.4257e-05	0.000249	0.82481	0.98041	1
Mex3d	540	-0.348337	0.0023735	0.006891		0.36435	0.0023735	0.006891	0.17335	0.39936	1
Bcl6	541	-0.347356	0.0018674	0.00552		0.34115	0.0018674	0.00552	0.93561	0.99801	1
Ccar1	542	-0.347062	1.3751e-05	4.8e-05		0.054557	1.3751e-05	4.8e-05	0.74559	0.95858	1
Cnot4	543	-0.3246	0.0014989	0.004467		0.32508	0.0014989	0.004467	0.46971	0.76754	1
Dnaja1	544	-0.320181	2.7503e-06	1e-05		0.0023982	2.7503e-06	1e-05	0.96233	0.99941	1
Alkbh1	545	-0.314562	0.0019499	0.005716		0.35072	0.0019499	0.005716	0.86735	0.98734	1
Rbm27	546	-0.302631	0.00032178	0.001022		0.19642	0.00032178	0.001022	0.72799	0.9524	1
U2surp	547	-0.29435	1.3751e-05	4.8e-05		0.077652	1.3751e-05	4.8e-05	0.68687	0.9292	1
Scaf1	548	-0.293394	0.0051898	0.014528		0.48716	0.0051898	0.014528	0.59009	0.89158	1
Pgk1	549	-0.292775	0.0093317	0.025605		0.54058	0.0093317	0.025605	0.60254	0.89661	1
Hk2	550	-0.287913	0.00099835	0.003036		0.29036	0.00099835	0.003036	0.76338	0.96498	1
Eri1	551	-0.276706	1.9252e-05	6.5e-05		0.092701	1.9252e-05	6.5e-05	0.34923	0.65818	1
Sod1	552	-0.276313	0.00032178	0.001022		0.19629	0.00032178	0.001022	0.99216	1	1
Chtop	553	-0.276094	2.7503e-06	1e-05		0.014355	2.7503e-06	1e-05	0.25102	0.53492	1
Prdm1	554	-0.254581	0.0011964	0.003613		0.3076	0.0011964	0.003613	0.028164	0.051994	1
Mettl3	555	-0.253656	0.00012926	0.000422		0.13918	0.00012926	0.000422	0.97138	0.99966	1
Clasrp	556	-0.2515	0.0004758	0.001489		0.23908	0.0004758	0.001489	0.1876	0.42384	1
Txnrd1	557	-0.2492	0.0082096	0.022749		0.51893	0.0082096	0.022749	0.53747	0.85154	1
Lat	558	-0.243387	0.0018949	0.005592		0.34504	0.0018949	0.005592	0.44927	0.72112	1
Mex3a	559	-0.241187	0.00086084	0.002644		0.27582	0.00086084	0.002644	0.38169	0.66605	1
Igf2bp3	560	-0.2408	0.002214	0.006448		0.36236	0.002214	0.006448	0.64609	0.91756	1
Clasp2	561	-0.235137	0.00056381	0.001753		0.25254	0.00056381	0.001753	0.958	0.99929	1
Srsf5	562	-0.232512	0.0035066	0.010067		0.4134	0.0035066	0.010067	0.52851	0.84791	1
Fkbp1a	563	-0.230337	0.011928	0.032093		0.57529	0.011928	0.032093	0.27077	0.55469	1
Zfp638	564	-0.229462	0.0012844	0.003866		0.31732	0.0012844	0.003866	0.67976	0.92733	1
Slc25a5	565	-0.228994	2.7503e-06	1e-05		0.027071	2.7503e-06	1e-05	0.99746	1	1
Ddx31	566	-0.226206	0.00059681	0.001849		0.26098	0.00059681	0.001849	0.98466	0.99996	1
Eif3j1	567	-0.2197	0.0045297	0.01276		0.46053	0.0045297	0.01276	0.13382	0.27669	1
Cnot6l	568	-0.219481	0.00077283	0.002378		0.27275	0.00077283	0.002378	0.70216	0.93941	1
Purb	569	-0.218637	0.0014989	0.004467		0.32577	0.0014989	0.004467	0.10474	0.1989	1
Mettl14	570	-0.217244	0.00030528	0.000974		0.18915	0.00030528	0.000974	0.034643	0.067698	1
Smg9	571	-0.214906	0.010201	0.027862		0.55353	0.010201	0.027862	0.39691	0.6876	1
Wdr33	572	-0.208137	8.5259e-05	0.000284		0.12131	8.5259e-05	0.000284	0.63218	0.91317	1
Tnpo1	573	-0.206431	0.00095985	0.002928		0.28306	0.00095985	0.002928	0.64522	0.91756	1
C1qbp	574	-0.206106	1.9252e-05	6.5e-05		0.096536	1.9252e-05	6.5e-05	0.99157	0.99999	1
Patl1	575	-0.198013	0.00060781	0.001877		0.26398	0.00060781	0.001877	0.94443	0.99867	1
Hnrnpab	576	-0.197162	0.0015044	0.004476		0.33011	0.0015044	0.004476	0.84829	0.98383	1
Khdc1c	577	-0.196556	2.7503e-06	1e-05		0.001096	2.7503e-06	1e-05	0.93952	0.99835	1
Nsrp1	578	-0.184762	0.00033828	0.001072		0.20959	0.00033828	0.001072	0.124	0.26152	1
Thoc6	579	-0.18455	0.0016144	0.00478		0.33395	0.0016144	0.00478	0.22491	0.50414	1
Syncrip	580	-0.178994	0.0049807	0.01398		0.47773	0.0049807	0.01398	0.98033	0.99989	1
Gfm1	581	-0.170481	0.0042162	0.012008		0.44269	0.0042162	0.012008	0.67142	0.9235	1
Hnrnpa0	582	-0.168394	0.0021975	0.006411		0.35733	0.0021975	0.006411	0.18143	0.39936	1
Alkbh5	583	-0.168387	0.016257	0.042104		0.60976	0.016257	0.042104	0.99151	0.99999	1
Bak1	584	-0.159619	0.0035836	0.010271		0.41514	0.0035836	0.010271	0.62366	0.90644	1
Dicer1	585	-0.156056	0.00030528	0.000974		0.18762	0.00030528	0.000974	0.97357	0.99974	1
Celf1	586	-0.148331	0.00017327	0.000561		0.15453	0.00017327	0.000561	0.97132	0.99966	1
Dhx30	587	-0.143019	0.013881	0.03707		0.58711	0.013881	0.03707	0.56973	0.87463	1
Tln1	588	-0.141706	0.0011964	0.003613		0.30743	0.0011964	0.003613	0.9294	0.99759	1
Dus3l	589	-0.137387	0.014084	0.037227		0.59271	0.014084	0.037227	0.1557	0.33358	1
Unk	590	-0.136125	0.010817	0.029323		0.55562	0.010817	0.029323	0.12071	0.24655	1
2210016L21Rik	591	-0.135275	0.0016089	0.004771		0.33186	0.0016089	0.004771	0.17771	0.39936	1
Ubap2	592	-0.131312	0.00020077	0.000648		0.16367	0.00020077	0.000648	0.96082	0.99939	1
Nol8	593	-0.130319	0.00055831	0.001739		0.2513	0.00055831	0.001739	0.13056	0.27669	1
Isy1	594	-0.121744	0.00036029	0.00114		0.2126	0.00036029	0.00114	0.80923	0.97727	1
1810009A15Rik	595	-0.121356	1.3751e-05	4.8e-05		0.057369	1.3751e-05	4.8e-05	0.77525	0.96986	1
Clk1	596	-0.114331	1.3751e-05	4.8e-05		0.061576	1.3751e-05	4.8e-05	0.67006	0.9235	1
Zc3h11a	597	-0.114294	0.00058581	0.001818		0.25753	0.00058581	0.001818	0.49309	0.816	1
Bzw1	598	-0.113381	0.0049862	0.01398		0.48216	0.0049862	0.01398	0.18821	0.42384	1
Pdap1	599	-0.109631	2.7503e-06	1e-05		0.025995	2.7503e-06	1e-05	0.53821	0.85154	1
Tmed9	600	-0.1081	0.0029565	0.008542		0.37195	0.0029565	0.008542	0.99697	1	1
Txnrd2	601	-0.104556	0.011895	0.032067		0.56643	0.011895	0.032067	0.8217	0.9804	1
Zc3hav1	602	-0.092475	0.0082096	0.022749		0.51817	0.0082096	0.022749	0.95329	0.99914	1
Ankrd17	603	-0.0915812	0.00029978	0.00096		0.17865	0.00029978	0.00096	0.59962	0.8966	1
Cirbp	604	-0.0894562	0.014079	0.037227		0.58954	0.014079	0.037227	0.81164	0.97788	1
Hnrnph2	605	-0.0891813	0.00060781	0.001877		0.2648	0.00060781	0.001877	0.45829	0.73946	1
Sugp1	606	-0.0870688	0.0014989	0.004467		0.32575	0.0014989	0.004467	0.50581	0.82056	1
Thrap3	607	-0.0868312	0.0032261	0.009291		0.40089	0.0032261	0.009291	0.64667	0.91756	1
Rexo4	608	-0.0854812	0.010817	0.029323		0.556	0.010817	0.029323	0.19799	0.44784	1
Prrc2a	609	-0.0833437	0.0004703	0.001483		0.23517	0.0004703	0.001483	0.79864	0.97379	1
Nasp	610	-0.0783688	0.0012624	0.003806		0.31424	0.0012624	0.003806	0.25897	0.54485	1
Nme1	611	-0.0757625	0.010201	0.027862		0.55346	0.010201	0.027862	0.9885	0.99998	1
Eif3k	612	-0.0717437	0.0014989	0.004467		0.32395	0.0014989	0.004467	0.91138	0.99604	1
Nfx1	613	-0.071025	0.00094884	0.002905		0.27954	0.00094884	0.002905	0.7397	0.95614	1
Pqbp1	614	-0.0693125	0.010817	0.029323		0.55525	0.010817	0.029323	0.30622	0.60945	1
Cnot10	615	-0.0658562	0.00055831	0.001739		0.25126	0.00055831	0.001739	0.45487	0.73334	1
Ctnnbl1	616	-0.0616944	0.0010479	0.003181		0.30072	0.0010479	0.003181	0.94541	0.99876	1
Smg6	617	-0.0604494	0.011895	0.032067		0.56775	0.011895	0.032067	0.48377	0.79284	1
Psip1	618	-0.0550731	2.7503e-06	1e-05		0.0021034	2.7503e-06	1e-05	0.33499	0.63479	1
Zc3h7b	619	-0.0541062	0.0027805	0.008047		0.36923	0.0027805	0.008047	0.81917	0.97852	1
Ern1	620	-0.0499094	0.0043262	0.01224		0.44673	0.0043262	0.01224	0.2601	0.54485	1
Mtpap	621	-0.0390987	0.0027805	0.008047		0.36887	0.0027805	0.008047	0.12729	0.26152	1
Acin1	622	-0.0379131	0.015701	0.040915		0.60367	0.015701	0.040915	0.00037042	0.0017904	1
Zap70	623	-0.0347469	0.016257	0.042104		0.60939	0.016257	0.042104	0.9184	0.99713	1
Fkbp3	624	-0.0345375	0.00029978	0.00096		0.18333	0.00029978	0.00096	0.34113	0.64281	1
Snd1	625	-0.0305931	0.014084	0.037227		0.59558	0.014084	0.037227	0.35773	0.66605	1
Srrm3	626	-0.0258231	0.014084	0.037227		0.5929	0.014084	0.037227	0.7024	0.93941	1
Hnrnph1	627	-0.0224562	0.014376	0.037886		0.59773	0.014376	0.037886	0.38457	0.68062	1
Ilf3	628	-0.00998813	0.015701	0.040915		0.60348	0.015701	0.040915	0.35574	0.65818	1
Secisbp2	629	-0.00969625	0.016257	0.042104		0.60957	0.016257	0.042104	0.53226	0.85154	1
Eif4h	630	-0.00849187	0.0088146	0.02426		0.53389	0.0088146	0.02426	0.70832	0.94099	1
Eef1d	631	-0.00548919	0.019381	0.050052		0.61894	0.019381	0.050052	0.058773	0.10066	1
1110004F10Rik	632	-0.00393513	0.0119	0.032067		0.57077	0.0119	0.032067	0.50856	0.82457	1
Rap1a	633	-0.00327356	0.0093317	0.025605		0.5381	0.0093317	0.025605	0.33909	0.6428	1
Mdh2	634	0.00769687	0.97309	0.0518		0.62223	0.020168	0.0518	0.79599	0.97309	1
Ppil3	635	0.00925625	0.95858	0.01224		0.44753	0.0043262	0.01224	0.74408	0.95858	1
Ttf2	636	0.0153013	0.99939	0.022749		0.52488	0.0082151	0.022749	0.96173	0.99939	1
Npm3	637	0.01663	0.98604	0.040915		0.60865	0.015707	0.040915	0.85906	0.98604	1
Ripk1	638	0.0225956	0.62663	0.01224		0.4492	0.0043262	0.01224	0.31943	0.62663	1
Mocs3	639	0.0261756	0.97308	0.037886		0.59736	0.014376	0.037886	0.79386	0.97308	1
Mkrn2	640	0.0296781	0.65818	0.03553		0.58515	0.013265	0.03553	0.35274	0.65818	1
Bid	641	0.03136	0.99841	0.153725		0.80766	0.068408	0.153725	0.93999	0.99841	1
Nanos2	642	0.0379094	0.93599	0.144912		0.79625	0.0636	0.144912	0.6989	0.93599	1
Srsf11	643	0.0531831	0.99428	0.021802		0.51526	0.0078245	0.021802	0.90192	0.99428	1
Myo18a	644	0.0542894	0.85154	0.037227		0.59569	0.014084	0.037227	0.53673	0.85154	1
Zfp598	645	0.0556006	0.99993	0.032067		0.56907	0.011895	0.032067	0.98219	0.99993	1
Arid5a	646	0.05586	0.98886	0.033567		0.57811	0.012494	0.033567	0.87161	0.98886	1
Prkd2	647	0.0608156	0.98383	0.10578		0.75415	0.044128	0.10578	0.84775	0.98383	1
Setx	648	0.0640938	0.72111	0.073485		0.71401	0.029838	0.073485	0.44535	0.72111	1
Hadhb	649	0.0702875	0.96892	0.036772		0.5858	0.013749	0.036772	0.76958	0.96892	1
Ywhag	650	0.0712562	0.92733	0.049441		0.61766	0.019117	0.049441	0.68399	0.92733	1
Trub2	651	0.0761437	0.86176	0.088436		0.74268	0.036504	0.088436	0.55279	0.86176	1
Tarbp2	652	0.0900375	0.99977	0.076887		0.72001	0.031433	0.076887	0.9746	0.99977	1
Sap18b	653	0.0921938	0.47103	1e-05		0.0025903	2.7503e-06	1e-05	0.20945	0.47103	1
Sqstm1	654	0.0933062	0.95494	0.466212		0.93455	0.24735	0.466212	0.733	0.95494	1
Cdv3	655	0.0941375	0.82056	0.010271		0.41805	0.0035891	0.010271	0.50503	0.82056	1
Srsf6	656	0.0963375	0.10066	0.356331		0.91556	0.17757	0.356331	0.056666	0.10066	1
Nelfe	657	0.101731	0.99759	0.133791		0.78696	0.057753	0.133791	0.93021	0.99759	1
Zc3h13	658	0.103025	0.99446	0.466212		0.93574	0.24735	0.466212	0.90292	0.99446	1
Fxr2	659	0.106513	0.91756	0.153725		0.80609	0.068408	0.153725	0.64841	0.91756	1
Zcrb1	660	0.107369	0.33358	0.01224		0.4498	0.0043317	0.01224	0.15124	0.33358	1
Elavl1	661	0.108406	0.95857	0.023955		0.52738	0.0086771	0.023955	0.74146	0.95857	1
Fam46a	662	0.108706	0.99929	0.487113		0.94102	0.26385	0.487113	0.95813	0.99929	1
Afdn	663	0.116819	0.98471	0.185327		0.82328	0.08453	0.185327	0.85429	0.98471	1
Hist1h1b	664	0.119806	0.99841	0.067799		0.68641	0.027076	0.067799	0.9404	0.99841	1
Flna	665	0.119962	0.72111	0.153725		0.80359	0.068402	0.153725	0.44405	0.72111	1
Dhx35	666	0.120819	0.62663	0.040565		0.60107	0.015437	0.040565	0.32257	0.62663	1
Ptprc	667	0.1241	0.98886	0.054603		0.64473	0.021356	0.054603	0.87173	0.98886	1
Rbm4b	668	0.124331	0.99714	0.034211		0.58318	0.012753	0.034211	0.92324	0.99714	1
Dazap1	669	0.126012	0.21495	0.140736		0.79026	0.061449	0.140736	0.11143	0.21495	1
Trmt2a	670	0.127306	0.96987	0.009371		0.40165	0.0032591	0.009371	0.77804	0.96987	1
Pnkp	671	0.130544	0.9738	0.268051		0.87972	0.12718	0.268051	0.80073	0.9738	1
Rbm12b1	672	0.136987	0.98644	0.160308		0.81154	0.071515	0.160308	0.86208	0.98644	1
Gm4301	673	0.138194	0.98735	4.8e-05		0.06994	1.3751e-05	4.8e-05	0.86831	0.98735	1
Dcps	674	0.140825	0.10067	0.029323		0.55619	0.010817	0.029323	0.064372	0.10067	1
Ccar2	675	0.150275	0.59171	0.029323		0.55714	0.010817	0.029323	0.30087	0.59171	1
Fastkd1	676	0.152213	0.66605	0.348129		0.91104	0.17232	0.348129	0.37153	0.66605	1
Pym1	677	0.153106	0.85154	0.022749		0.52335	0.0082151	0.022749	0.54482	0.85154	1
Eif4a2	678	0.153694	0.98645	4.8e-05		0.074096	1.3751e-05	4.8e-05	0.8632	0.98645	1
Zc3h4	679	0.157469	0.77314	0.082737		0.73901	0.034106	0.082737	0.47221	0.77314	1
Pebp1	680	0.15965	0.92156	0.073485		0.71628	0.029843	0.073485	0.66621	0.92156	1
Qk	681	0.160494	0.78813	0.133791		0.78654	0.057753	0.133791	0.48049	0.78813	1
Prkra	682	0.168425	0.5145	0.888111		0.98436	0.53879	0.888111	0.23545	0.5145	1
Taco1	683	0.169194	0.90645	0.402294		0.92375	0.20539	0.402294	0.62611	0.90645	1
Tnf	684	0.180037	0.96497	0.217144		0.85566	0.10133	0.217144	0.75682	0.96497	1
Hnrnpr	685	0.182331	0.98471	0.054603		0.64575	0.021356	0.054603	0.85468	0.98471	1
Lrpprc	686	0.1838	0.99949	0.037227		0.59006	0.014079	0.037227	0.96647	0.99949	1
Fyttd1	687	0.185469	0.50415	0.16724		0.81618	0.07563	0.16724	0.22844	0.50415	1
Iqgap1	688	0.185775	0.85154	0.075122		0.71774	0.030586	0.075122	0.53562	0.85154	1
Ndufa4	689	0.192281	0.98151	0.056934		0.65812	0.022362	0.056934	0.83765	0.98151	1
Mkrn1	690	0.192869	0.95239	0.16724		0.81372	0.075624	0.16724	0.72522	0.95239	1
Spi1	691	0.197	0.9918	0.487113		0.94017	0.26385	0.487113	0.88953	0.9918	1
Dst	692	0.200856	0.92733	0.120402		0.77435	0.051438	0.120402	0.68135	0.92733	1
Hsp90aa1	693	0.202531	0.66605	0.023955		0.52695	0.0086771	0.023955	0.36663	0.66605	1
Lsm12	694	0.203125	0.62663	0.111806		0.76499	0.047269	0.111806	0.32622	0.62663	1
Cmtr1	695	0.206356	0.9952	0.160308		0.81142	0.07151	0.160308	0.90815	0.9952	1
Pak1ip1	696	0.207294	0.96283	0.01276		0.46471	0.0045297	0.01276	0.75179	0.96283	1
Ddx28	697	0.209444	0.50415	0.16724		0.81728	0.07563	0.16724	0.22902	0.50415	1
Zc3h7a	698	0.20975	0.9847	0.120402		0.77269	0.051433	0.120402	0.8535	0.9847	1
Cdkn1a	699	0.211406	0.89661	0.042104		0.6099	0.016257	0.042104	0.60672	0.89661	1
Dis3l	700	0.213869	0.87463	0.111806		0.76322	0.047269	0.111806	0.56274	0.87463	1
Lmna	701	0.213888	0.70835	0.040915		0.60791	0.015707	0.040915	0.42407	0.70835	1
Ddx4	702	0.220412	0.66605	0.205609		0.83955	0.095151	0.205609	0.36859	0.66605	1
Rbm15	703	0.221962	0.91756	0.06161		0.67198	0.024365	0.06161	0.65014	0.91756	1
Agfg1	704	0.222575	0.88642	0.114523		0.76564	0.048545	0.114523	0.58643	0.88642	1
Dido1	705	0.224775	0.92156	0.073485		0.71384	0.029838	0.073485	0.65981	0.92156	1
Psap	706	0.228356	0.65818	1		0.99167	0.65076	1	0.35374	0.65818	1
Samd4b	707	0.234269	0.99987	0.139268		0.78837	0.060272	0.139268	0.9789	0.99987	1
Gdi2	708	0.234825	0.91955	0.010772		0.42775	0.0037761	0.010772	0.65529	0.91955	1
Ddx1	709	0.235663	0.9815	0.380554		0.92074	0.19323	0.380554	0.82894	0.9815	1
Erp29	710	0.236881	0.8444	0.146796		0.79881	0.064585	0.146796	0.52054	0.8444	1
Ncbp3	711	0.238537	0.33358	0.040915		0.6057	0.015707	0.040915	0.15761	0.33358	1
Cwf19l1	712	0.24125	0.91099	0.111806		0.76528	0.047269	0.111806	0.63127	0.91099	1
Stat4	713	0.242456	0.92733	0.16724		0.81563	0.075624	0.16724	0.67736	0.92733	1
Papd5	714	0.243119	0.99098	0.080604		0.73401	0.033177	0.080604	0.88148	0.99098	1
Noa1	715	0.246344	0.94099	0.127268		0.77871	0.054513	0.127268	0.70857	0.94099	1
Taf15	716	0.247844	0.9847	0.208117		0.84346	0.096427	0.208117	0.85311	0.9847	1
Tfam	717	0.249131	0.89661	0.100065		0.7487	0.041471	0.100065	0.60495	0.89661	1
Swt1	718	0.255381	0.26152	0.294378		0.89286	0.14195	0.294378	0.12466	0.26152	1
Zfp326	719	0.256213	0.018886	0.153725		0.80596	0.068408	0.153725	0.0048058	0.018886	1
Zcchc8	720	0.256375	0.70835	0.10578		0.75369	0.044128	0.10578	0.42475	0.70835	1
Sptan1	721	0.264794	0.97659	0.442067		0.9288	0.23036	0.442067	0.80739	0.97659	1
Ripk3	722	0.267581	0.97588	0.599415		0.96191	0.33334	0.599415	0.80451	0.97588	1
Grsf1	723	0.268631	0.816	0.723298		0.97263	0.41228	0.723298	0.49989	0.816	1
Akap8l	724	0.269313	0.97914	0.120402		0.77498	0.051438	0.120402	0.81949	0.97914	1
Cpsf4l	725	0.270413	0.60946	0.16687		0.81297	0.074535	0.16687	0.31206	0.60946	1
Pabpc4	726	0.276	0.62663	0.697172		0.97015	0.39584	0.697172	0.321	0.62663	1
Dnd1	727	0.278244	0.73947	0.16724		0.81602	0.07563	0.16724	0.46042	0.73947	1
Usp10	728	0.281531	0.084277	0.075122		0.71871	0.030591	0.075122	0.036795	0.084277	1
Stat5b	729	0.2855	0.97155	0.16724		0.81614	0.07563	0.16724	0.7838	0.97155	1
Pnldc1	730	0.285644	0.97788	0.140736		0.78976	0.061449	0.140736	0.81304	0.97788	1
Zcchc6	731	0.286206	0.42384	0.040915		0.60902	0.015707	0.040915	0.18698	0.42384	1
Rbm12	732	0.287787	0.5145	0.487113		0.94044	0.26385	0.487113	0.23312	0.5145	1
Angel1	733	0.288656	0.52479	0.474314		0.93662	0.25297	0.474314	0.2424	0.52479	1
Mif	734	0.289125	0.72112	0.073485		0.71566	0.029843	0.073485	0.44666	0.72112	1
Safb	735	0.290488	0.9524	0.080604		0.73685	0.033182	0.080604	0.72845	0.9524	1
Aff4	736	0.293931	0.27669	0.380554		0.92073	0.19323	0.380554	0.13512	0.27669	1
Pdia6	737	0.2951	0.99978	1		0.99587	0.71145	1	0.97497	0.99978	1
Ptpn22	738	0.298931	0.88069	0.06161		0.67581	0.02437	0.06161	0.57934	0.88069	1
Msi1	739	0.300675	0.8444	0.353067		0.91468	0.17555	0.353067	0.51863	0.8444	1
Mthfsd	740	0.301113	0.15002	0.380554		0.92116	0.19324	0.380554	0.074096	0.15002	1
Lin28a	741	0.30175	0.82457	0.942141		0.98784	0.58465	0.942141	0.50934	0.82457	1
Idh2	742	0.302294	0.99713	0.368191		0.91963	0.18512	0.368191	0.92077	0.99713	1
Celf2	743	0.303844	0.94099	0.130536		0.78221	0.05613	0.130536	0.70906	0.94099	1
Tdrd7	744	0.307356	0.98604	0.306234		0.90234	0.14869	0.306234	0.86008	0.98604	1
Hnrnpa1l2-ps2	745	0.308837	0.95614	0.05644		0.65792	0.022137	0.05644	0.73925	0.95614	1
Myd88	746	0.309594	0.33357	0.316543		0.90403	0.15405	0.316543	0.14932	0.33357	1
Anxa2	747	0.310581	0.90644	0.985013		0.98913	0.61946	0.985013	0.62211	0.90644	1
Gspt2	748	0.314912	0.96497	0.365047		0.91779	0.18292	0.365047	0.75827	0.96497	1
Larp4	749	0.318131	0.73335	0.120402		0.77581	0.051438	0.120402	0.45616	0.73335	1
Gpx1	750	0.318856	0.97914	0.264933		0.87641	0.12511	0.264933	0.82028	0.97914	1
Strap	751	0.321394	0.99929	0.306234		0.90177	0.14869	0.306234	0.95761	0.99929	1
Ssb	752	0.32205	0.99484	0.16724		0.8149	0.075624	0.16724	0.90789	0.99484	1
Clk3	753	0.326494	0.43593	0.144912		0.79612	0.063595	0.144912	0.19433	0.43593	1
Eif4e1b	754	0.329162	0.94099	0.279158		0.88774	0.13322	0.279158	0.70759	0.94099	1
Safb2	755	0.333356	0.816	0.469388		0.93597	0.25007	0.469388	0.50108	0.816	1
Cpsf7	756	0.341637	0.9957	0.10578		0.75625	0.044134	0.10578	0.90927	0.9957	1
Mtrf1	757	0.342456	0.85154	1		0.999	0.84209	1	0.53413	0.85154	1
Khdc1a	758	0.344963	0.66605	1e-05		0.014355	2.7503e-06	1e-05	0.36712	0.66605	1
Rbm4	759	0.3485	0.5547	0.271617		0.88299	0.12902	0.271617	0.273	0.5547	1
Btk	760	0.34885	0.99484	0.055551		0.65195	0.021757	0.055551	0.90632	0.99484	1
Eral1	761	0.349225	0.50415	0.585757		0.95593	0.32346	0.585757	0.22961	0.50415	1
Khdrbs1	762	0.351925	0.5547	0.378239		0.92018	0.1908	0.378239	0.27355	0.5547	1
Slirp	763	0.353637	0.013116	0.067799		0.68716	0.027076	0.067799	0.003043	0.013116	1
Itgal	764	0.353662	0.92156	0.884608		0.98405	0.53421	0.884608	0.664	0.92156	1
Rbm15b	765	0.356131	0.53491	0.850081		0.98023	0.49777	0.850081	0.24528	0.53491	1
Igf2bp1	766	0.357375	0.6876	0.368191		0.91926	0.18511	0.368191	0.39738	0.6876	1
Frg1	767	0.361013	0.5145	0.071485		0.70992	0.028793	0.071485	0.23253	0.5145	1
U2af1l4	768	0.36145	0.70836	0.190289		0.82733	0.087533	0.190289	0.43258	0.70836	1
Bach2	769	0.365781	0.79744	0.321551		0.90459	0.15684	0.321551	0.48581	0.79744	1
Pcbp4	770	0.366725	0.97379	0.114523		0.76638	0.048545	0.114523	0.79881	0.97379	1
Tma7	771	0.367169	0.60945	0.071485		0.70948	0.028793	0.071485	0.30675	0.60945	1
Rbm7	772	0.36875	0.91317	0.01224		0.45203	0.0043317	0.01224	0.63428	0.91317	1
Larp1b	773	0.373944	0.98151	0.442067		0.92962	0.23036	0.442067	0.83923	0.98151	1
Luc7l	774	0.375556	0.66605	0.247061		0.86979	0.11584	0.247061	0.37929	0.66605	1
Adad2	775	0.375962	0.18272	0.06161		0.67164	0.024365	0.06161	0.087831	0.18272	1
Tcerg1	776	0.376256	0.86176	0.174547		0.81973	0.079128	0.174547	0.55243	0.86176	1
Eif2ak4	777	0.379819	0.94099	0.977677		0.98844	0.61105	0.977677	0.70954	0.94099	1
Sumo1	778	0.381556	0.98735	0.072246		0.71266	0.029139	0.072246	0.86866	0.98735	1
Nap1l4	779	0.383931	0.21495	0.380554		0.92095	0.19323	0.380554	0.11209	0.21495	1
Trub1	780	0.385313	0.66605	0.466212		0.93425	0.24735	0.466212	0.37784	0.66605	1
Zc3h8	781	0.387031	0.0049917	0.141171		0.79364	0.061801	0.141171	0.0018509	0.0049917	1
Zfp36	782	0.388856	0.92156	0.008941		0.37735	0.0030996	0.008941	0.66566	0.92156	1
Mkrn3	783	0.395275	0.89661	0.16724		0.81551	0.075624	0.16724	0.60351	0.89661	1
Zfp36l2	784	0.396913	0.035421	0.487113		0.94038	0.26385	0.487113	0.014355	0.035421	1
Mki67	785	0.39915	0.29104	0.888111		0.98429	0.53878	0.888111	0.14095	0.29104	1
Paip1	786	0.399938	0.89661	0.298938		0.89739	0.14432	0.298938	0.60895	0.89661	1
Serbp1	787	0.401181	0.92733	0.294378		0.8951	0.14196	0.294378	0.67843	0.92733	1
Knop1	788	0.401181	0.47103	0.822624		0.97836	0.47575	0.822624	0.21304	0.47103	1
Ybx2	789	0.401194	0.96498	0.076887		0.72562	0.031438	0.076887	0.76479	0.96498	1
Parn	790	0.406425	0.99066	0.091751		0.74365	0.037924	0.091751	0.87967	0.99066	1
Mif4gd	791	0.406438	0.99714	4.8e-05		0.065418	1.3751e-05	4.8e-05	0.92279	0.99714	1
Esrp2	792	0.408725	0.6876	0.306234		0.90195	0.14869	0.306234	0.40252	0.6876	1
Mtdh	793	0.409337	0.97447	0.436181		0.92725	0.22535	0.436181	0.80142	0.97447	1
Ipo4	794	0.4097	0.95494	0.989406		0.98923	0.62442	0.989406	0.73368	0.95494	1
Trim71	795	0.411931	0.60946	0.509582		0.94214	0.27687	0.509582	0.31417	0.60946	1
Vim	796	0.4146	0.95495	1		0.99968	0.92835	1	0.73413	0.95495	1
Jmjd6	797	0.417275	0.87463	0.111806		0.76071	0.047263	0.111806	0.56239	0.87463	1
Celf4	798	0.41925	0.85843	0.111107		0.75893	0.046603	0.111107	0.54846	0.85843	1
Thumpd1	799	0.422275	0.99759	0.217144		0.8562	0.10133	0.217144	0.92892	0.99759	1
Habp4	800	0.423644	0.816	0.0207		0.51163	0.0074175	0.0207	0.49189	0.816	1
Fastk	801	0.424019	0.33358	0.520468		0.94445	0.28366	0.520468	0.15252	0.33358	1
Edem1	802	0.42465	0.70836	0.884608		0.98408	0.53421	0.884608	0.43392	0.70836	1
Rbm47	803	0.424731	0.70836	0.466212		0.93395	0.24735	0.466212	0.43214	0.70836	1
Ppih	804	0.424819	0.33357	0.115941		0.77038	0.049211	0.115941	0.1506	0.33357	1
Larp1	805	0.425819	0.33357	0.069903		0.70364	0.028039	0.069903	0.14482	0.33357	1
Hic2	806	0.426075	0.66605	0.111806		0.76056	0.047263	0.111806	0.37006	0.66605	1
Ctnnd1	807	0.429812	0.64281	0.404939		0.92574	0.20787	0.404939	0.34062	0.64281	1
Trim56	808	0.431206	0.6876	0.484613		0.93898	0.26115	0.484613	0.39313	0.6876	1
Fam120a	809	0.432412	0.26152	0.989406		0.98924	0.62442	0.989406	0.12532	0.26152	1
Ppid	810	0.434037	0.6876	0.327008		0.90517	0.15987	0.327008	0.40019	0.6876	1
Mex3c	811	0.4346	0.99714	0.874722		0.98269	0.52046	0.874722	0.92138	0.99714	1
Fn1	812	0.437275	0.98644	0.509582		0.94258	0.27687	0.509582	0.86246	0.98644	1
Eif4ebp1	813	0.438337	0.1989	1		0.99933	0.89238	1	0.095983	0.1989	1
Srsf12	814	0.439225	0.018886	0.127268		0.77783	0.054508	0.127268	0.0077529	0.018886	1
Nono	815	0.44035	0.85154	0.442067		0.93044	0.23037	0.442067	0.53001	0.85154	1
Slbp	816	0.442537	0.62663	0.001433		0.22398	0.0004538	0.001433	0.32984	0.62663	1
Dhx36	817	0.445687	0.45958	0.516271		0.94392	0.28108	0.516271	0.20585	0.45958	1
Pcbp3	818	0.446331	0.97789	0.287422		0.88988	0.13748	0.287422	0.8158	0.97789	1
Cpeb4	819	0.447756	0.96892	0.250006		0.87329	0.11778	0.250006	0.77136	0.96892	1
Mex3b	820	0.449444	0.65818	0.985013		0.98893	0.61946	0.985013	0.3467	0.65818	1
Rbm11	821	0.452575	0.78813	0.436181		0.92718	0.22535	0.436181	0.47802	0.78813	1
Srek1	822	0.453237	0.6428	0.0518		0.62404	0.020168	0.0518	0.33755	0.6428	1
Fxr1	823	0.454056	0.1989	0.000422		0.13707	0.00012926	0.000422	0.10407	0.1989	1
Bcl2l1	824	0.454375	0.85844	0.212889		0.84854	0.098875	0.212889	0.54918	0.85844	1
Cstf2	825	0.4559	0.39936	0.068516		0.68925	0.027406	0.068516	0.17273	0.39936	1
Rpusd4	826	0.456944	0.64281	0.140736		0.79218	0.061455	0.140736	0.3396	0.64281	1
Nol3	827	0.457669	0.27669	0.442067		0.9293	0.23036	0.442067	0.13121	0.27669	1
Utp14a	828	0.458363	0.68062	0.140736		0.79154	0.061455	0.140736	0.38696	0.68062	1
Rbm10	829	0.458575	0.15002	0.893002		0.98554	0.5482	0.893002	0.071327	0.15002	1
Nova2	830	0.459169	0.98645	0.365047		0.91736	0.18292	0.365047	0.8627	0.98645	1
Strbp	831	0.463569	0.9995	0.0518		0.62514	0.020168	0.0518	0.96706	0.9995	1
Dhx32	832	0.464919	0.58258	0.769749		0.97508	0.44132	0.769749	0.28459	0.58258	1
Nxf2	833	0.466781	0.49973	8.4e-05		0.036408	2.4752e-05	8.4e-05	0.22693	0.49973	1
Bzw2	834	0.466831	0.9918	0.294378		0.89377	0.14195	0.294378	0.88799	0.9918	1
Casp8	835	0.467413	0.85154	0.268051		0.8773	0.12717	0.268051	0.54263	0.85154	1
Rbm38	836	0.4683	0.44784	1		0.99711	0.74163	1	0.19738	0.44784	1
Uhmk1	837	0.469081	0.92156	0.480085		0.93835	0.25685	0.480085	0.66483	0.92156	1
Gata3	838	0.470225	0.85154	1		0.99709	0.74163	1	0.54373	0.85154	1
Tpi1	839	0.470544	0.95107	0.0518		0.62542	0.020173	0.0518	0.72313	0.95107	1
Ddx43	840	0.471694	0.68062	0.430816		0.92674	0.22163	0.430816	0.38505	0.68062	1
Srsf9	841	0.4721	0.95858	0.484613		0.93846	0.26115	0.484613	0.74516	0.95858	1
Hnrnpll	842	0.472131	0.87137	0.303117		0.89972	0.14667	0.303117	0.55921	0.87137	1
Zfp385b	843	0.474056	0.89661	0.189385		0.82378	0.086796	0.189385	0.608	0.89661	1
Ddx59	844	0.476431	0.98921	0.348129		0.91073	0.17232	0.348129	0.8745	0.98921	1
Dhx57	845	0.476444	0.4821	0.871394		0.98193	0.51605	0.871394	0.21603	0.4821	1
Cpeb2	846	0.477388	0.018886	0.480085		0.93829	0.25685	0.480085	0.0070169	0.018886	1
Helz2	847	0.478563	0.98151	1		0.99844	0.80477	1	0.83708	0.98151	1
Noct	848	0.479244	0.51451	0.585757		0.95652	0.32346	0.585757	0.23719	0.51451	1
Srsf10	849	0.479594	0.97309	0.111107		0.759	0.046603	0.111107	0.79466	0.97309	1
Larp6	850	0.480825	0.82056	0.878073		0.98338	0.52489	0.878073	0.50424	0.82056	1
Sptbn1	851	0.481256	0.89661	0.327008		0.90665	0.15987	0.327008	0.60736	0.89661	1
Aen	852	0.48395	0.99369	0.153725		0.80386	0.068402	0.153725	0.89857	0.99369	1
Zfp593	853	0.486063	0.65818	0.642081		0.9648	0.36064	0.642081	0.35524	0.65818	1
Ifih1	854	0.488319	0.77798	0.893002		0.98591	0.5482	0.893002	0.47554	0.77798	1
Esrp1	855	0.492019	0.6876	0.338355		0.90776	0.16598	0.338355	0.40485	0.6876	1
Ascc3	856	0.494331	0.60946	0.430816		0.92654	0.22163	0.430816	0.31047	0.60946	1
Por	857	0.498506	0.43593	0.140736		0.78971	0.061449	0.140736	0.19128	0.43593	1
Ahcyl1	858	0.501031	0.61804	0.91565		0.98724	0.56669	0.91565	0.31576	0.61804	1
Edc4	859	0.502294	0.084277	0.697172		0.96971	0.39583	0.697172	0.040371	0.084277	1
Pcbp2	860	0.503894	0.21495	0.542418		0.94874	0.29682	0.542418	0.11276	0.21495	1
Nanos3	861	0.507231	0.70836	0.060392		0.6685	0.023754	0.060392	0.43635	0.70836	1
Dync1li2	862	0.508525	0.8023	0.190289		0.82599	0.087528	0.190289	0.48744	0.8023	1
Celf5	863	0.50985	0.92733	0.130536		0.78072	0.05613	0.130536	0.68294	0.92733	1
Ccdc9	864	0.511919	0.16652	0.076887		0.72222	0.031433	0.076887	0.078236	0.16652	1
Zc3h14	865	0.516219	0.41161	0.279158		0.88902	0.13322	0.279158	0.18575	0.41161	1
Igf1r	866	0.516325	0.39936	1		0.99899	0.84208	1	0.17647	0.39936	1
Serpinh1	867	0.520212	0.89158	0.574312		0.95509	0.31619	0.574312	0.59043	0.89158	1
Msi2	868	0.522437	0.084277	0.466212		0.93422	0.24735	0.466212	0.04251	0.084277	1
Smg7	869	0.522444	0.62663	0.348129		0.91134	0.17232	0.348129	0.3257	0.62663	1
Rpusd3	870	0.532181	0.88906	0.140736		0.79122	0.061449	0.140736	0.58876	0.88906	1
Papd7	871	0.53375	0.62663	0.818067		0.97815	0.47175	0.818067	0.33242	0.62663	1
Stat5a	872	0.534344	0.013122	0.356331		0.91563	0.17757	0.356331	0.0032562	0.013122	1
Myh10	873	0.534794	0.93778	0.878073		0.98335	0.52489	0.878073	0.70091	0.93778	1
Raver1	874	0.537256	0.15002	0.880735		0.98356	0.52941	0.880735	0.075478	0.15002	1
Khdrbs2	875	0.537606	0.53492	1e-05		0.00030702	2.7503e-06	1e-05	0.25273	0.53492	1
Hmgb3	876	0.537756	0.39936	1e-05		0.025995	2.7503e-06	1e-05	0.18329	0.39936	1
Lrrc47	877	0.539119	0.55469	1e-05		0.0025903	2.7503e-06	1e-05	0.2691	0.55469	1
Paip2	878	0.541737	0.89661	0.16724		0.81593	0.07563	0.16724	0.60318	0.89661	1
Eif2d	879	0.541844	0.44784	0.183338		0.82048	0.083419	0.183338	0.20344	0.44784	1
Gm10767	880	0.542669	0.58259	0.078785		0.72944	0.032258	0.078785	0.29277	0.58259	1
Ptcd1	881	0.543581	0.051994	0.067799		0.68766	0.027082	0.067799	0.029607	0.051994	1
Magohb	882	0.543625	0.70835	0.353067		0.91387	0.17555	0.353067	0.42901	0.70835	1
Ddx39	883	0.54375	0.8444	1		0.99709	0.74163	1	0.52207	0.8444	1
Rbm24	884	0.549075	0.97524	0.287422		0.89045	0.13748	0.287422	0.8028	0.97524	1
Csrp1	885	0.549431	0.60945	0.183338		0.82017	0.083419	0.183338	0.30782	0.60945	1
Parp1	886	0.550156	0.99264	0.378239		0.92046	0.1908	0.378239	0.89196	0.99264	1
Fbll1	887	0.552419	0.50414	0.153725		0.80478	0.068402	0.153725	0.22432	0.50414	1
Helz	888	0.552631	0.91956	0.365047		0.91791	0.18293	0.365047	0.65756	0.91956	1
Papola	889	0.554006	0.98604	0.279158		0.88854	0.13322	0.279158	0.85957	0.98604	1
Cmtr2	890	0.556669	0.98383	0.365047		0.91899	0.18293	0.365047	0.8491	0.98383	1
Xrn1	891	0.557719	0.6876	0.546183		0.95248	0.29979	0.546183	0.4127	0.6876	1
Hnrnpa1	892	0.557919	0.16652	0.294378		0.89443	0.14196	0.294378	0.079612	0.16652	1
Ddx25	893	0.558138	0.70835	0.697172		0.97021	0.39584	0.697172	0.42587	0.70835	1
Csdc2	894	0.5583	0.91318	0.83501		0.97879	0.48384	0.83501	0.64258	0.91318	1
Igf2bp2	895	0.558775	0.96892	0.217144		0.85667	0.10133	0.217144	0.77155	0.96892	1
Fam103a1	896	0.560119	0.53492	4.8e-05		0.06994	1.3751e-05	4.8e-05	0.255	0.53492	1
Rbm12b2	897	0.572225	0.99713	4.8e-05		0.072713	1.3751e-05	4.8e-05	0.91967	0.99713	1
Eif1b	898	0.572263	0.23037	1		0.99767	0.76809	1	0.11608	0.23037	1
Dqx1	899	0.576163	0.91756	0.094471		0.74641	0.039101	0.094471	0.65101	0.91756	1
Ikzf1	900	0.579475	0.1989	0.02754		0.55171	0.010052	0.02754	0.098011	0.1989	1
Cybb	901	0.580931	0.1989	0.64759		0.9653	0.36409	0.64759	0.11009	0.1989	1
Ngrn	902	0.580969	0.87782	1		0.99179	0.65076	1	0.57146	0.87782	1
Zbtb16	903	0.585256	0.43593	0.365047		0.91693	0.18292	0.365047	0.19311	0.43593	1
Eif4e2	904	0.586313	0.16652	0.103974		0.75022	0.043149	0.103974	0.082359	0.16652	1
Rbm14	905	0.586987	0.6876	0.893002		0.98559	0.5482	0.893002	0.41407	0.6876	1
Lck	906	0.588762	0.97852	1		0.99781	0.7827	1	0.81821	0.97852	1
Eif2ak1	907	0.592794	0.6876	0.183338		0.82013	0.083419	0.183338	0.40763	0.6876	1
Hexim1	908	0.593619	0.45958	0.871394		0.98199	0.51606	0.871394	0.20645	0.45958	1
Cpeb3	909	0.59405	0.6428	0.404939		0.92462	0.20786	0.404939	0.33858	0.6428	1
2810006K23Rik	910	0.596712	0.9455	1		0.99259	0.6585	1	0.71796	0.9455	1
Scaf8	911	0.597363	0.9804	0.387161		0.92205	0.19681	0.387161	0.82279	0.9804	1
Pnrc2	912	0.5998	0.90145	0.454006		0.93119	0.23684	0.454006	0.61527	0.90145	1
Sugp2	913	0.602056	0.58258	0.596261		0.95864	0.32993	0.596261	0.2813	0.58258	1
Eef1a2	914	0.605262	0.87463	0.466212		0.93508	0.24735	0.466212	0.56063	0.87463	1
Srsf4	915	0.6055	0.96497	1		0.99945	0.90748	1	0.75495	0.96497	1
Clk2	916	0.605775	0.56427	0.905682		0.98672	0.558	0.905682	0.27743	0.56427	1
Ago1	917	0.607394	0.26152	1		0.99898	0.84208	1	0.12663	0.26152	1
Dcp1a	918	0.609206	0.89661	1		0.99974	0.93705	1	0.60383	0.89661	1
Casc3	919	0.609575	0.1989	0.040565		0.60031	0.015432	0.040565	0.10138	0.1989	1
Papd4	920	0.609875	0.70835	0.862261		0.98073	0.50681	0.862261	0.42722	0.70835	1
Keap1	921	0.61195	0.44784	0.16724		0.81716	0.07563	0.16724	0.20404	0.44784	1
Aff2	922	0.612369	0.91756	0.210962		0.84641	0.097863	0.210962	0.65358	0.91756	1
Aldh2	923	0.613513	0.76754	0.83501		0.97881	0.48384	0.83501	0.46929	0.76754	1
Nufip2	924	0.6138	0.78813	0.905682		0.98637	0.558	0.905682	0.47967	0.78813	1
Eif2ak2	925	0.614106	0.85154	1		0.99555	0.70393	1	0.54446	0.85154	1
Hadha	926	0.617088	0.92156	0.071485		0.70789	0.028787	0.071485	0.66261	0.92156	1
Cnot6	927	0.618469	0.73946	0.516271		0.94388	0.28108	0.516271	0.45915	0.73946	1
Dpysl2	928	0.620487	0.94099	0.190289		0.82587	0.087528	0.190289	0.71003	0.94099	1
Tcea1	929	0.621581	0.65058	0.454824		0.93214	0.23954	0.454824	0.34265	0.65058	1
Ylpm1	930	0.624463	0.16652	0.015228		0.4962	0.0054483	0.015228	0.085782	0.16652	1
Lyar	931	0.633188	0.18272	0.944081		0.98798	0.589	0.944081	0.087149	0.18272	1
Elavl3	932	0.634	0.084282	0.279158		0.88943	0.13322	0.279158	0.046777	0.084282	1
Top3b	933	0.637062	0.94962	0.454824		0.93212	0.23954	0.454824	0.72149	0.94962	1
Tnrc6b	934	0.638687	0.16652	0.348129		0.90909	0.17232	0.348129	0.078924	0.16652	1
Srrm4	935	0.63875	0.5547	0.480085		0.93837	0.25685	0.480085	0.27466	0.5547	1
Ipo11	936	0.640562	0.95239	0.01398		0.48414	0.0049862	0.01398	0.7243	0.95239	1
Paip2b	937	0.640625	0.9292	0.454824		0.93298	0.23954	0.454824	0.69024	0.9292	1
Guf1	938	0.642125	0.90388	0.065173		0.68302	0.025883	0.065173	0.61746	0.90388	1
Dxo	939	0.642625	0.91317	4.8e-05		0.057369	1.3751e-05	4.8e-05	0.63697	0.91317	1
Ipo5	940	0.642875	0.70835	0.884608		0.98387	0.5342	0.884608	0.42362	0.70835	1
Zfp36l3	941	0.643062	0.9815	0.344558		0.90836	0.16922	0.344558	0.83201	0.9815	1
Endov	942	0.643625	0.85154	0.469388		0.93615	0.25007	0.469388	0.54409	0.85154	1
Tra2a	943	0.643625	0.8966	0.697172		0.97052	0.39584	0.697172	0.59832	0.8966	1
Nusap1	944	0.649312	0.29104	0.484613		0.93915	0.26115	0.484613	0.14031	0.29104	1
Ints6l	945	0.652125	0.067693	0.080604		0.73755	0.033182	0.080604	0.033925	0.067693	1
Hnrnpul1	946	0.652875	0.9815	0.944081		0.98804	0.589	0.944081	0.82712	0.9815	1
Plekha7	947	0.654375	0.90644	1		0.99919	0.86925	1	0.62181	0.90644	1
Ywhah	948	0.654563	0.91756	0.484613		0.9386	0.26115	0.484613	0.65444	0.91756	1
Map4	949	0.655562	0.86176	0.368191		0.91933	0.18511	0.368191	0.55171	0.86176	1
Pum2	950	0.657625	0.99037	0.626855		0.96352	0.35069	0.626855	0.8779	0.99037	1
Otud4	951	0.65775	0.89913	0.977677		0.98842	0.61105	0.977677	0.6137	0.89913	1
Cnbp	952	0.661375	0.051994	0.073485		0.71449	0.029838	0.073485	0.025995	0.051994	1
Sltm	953	0.661875	0.99713	0.065173		0.68445	0.025888	0.065173	0.91982	0.99713	1
Got2	954	0.662438	0.97155	0.189385		0.82439	0.086801	0.189385	0.78362	0.97155	1
Xbp1	955	0.66475	0.33357	0.391089		0.92287	0.19924	0.391089	0.1474	0.33357	1
Dhx34	956	0.66625	0.1989	0.174547		0.81942	0.079128	0.174547	0.094629	0.1989	1
Fubp3	957	0.666312	0.78316	1		0.9962	0.71898	1	0.4772	0.78316	1
Aicda	958	0.66875	0.80231	0.454824		0.93169	0.23954	0.454824	0.48865	0.80231	1
Jakmip1	959	0.670625	0.51451	0.454824		0.93322	0.23954	0.454824	0.23661	0.51451	1
Rbm44	960	0.67275	0.96498	0.985013		0.98892	0.61946	0.985013	0.76135	0.96498	1
Rbms3	961	0.675438	0.58259	0.054603		0.64611	0.021356	0.054603	0.2906	0.58259	1
Tnpo2	962	0.675563	0.8966	0.862261		0.98115	0.50682	0.862261	0.60124	0.8966	1
Bcl2	963	0.680063	0.55469	0.484613		0.93875	0.26115	0.484613	0.27021	0.55469	1
Hp1bp3	964	0.6805	0.1989	0.878073		0.983	0.52489	0.878073	0.097336	0.1989	1
Zc3h10	965	0.681813	0.99369	0.133791		0.78695	0.057753	0.133791	0.89843	0.99369	1
Eif4e3	966	0.683125	0.8479	0.111806		0.76469	0.047269	0.111806	0.52511	0.8479	1
Poldip3	967	0.683312	0.59172	0.871394		0.98165	0.51605	0.871394	0.3014	0.59172	1
Tia1	968	0.684688	0.65818	1		0.99476	0.68857	1	0.34519	0.65818	1
Tagln2	969	0.686625	0.6876	1		0.9965	0.73073	1	0.41636	0.6876	1
Papolg	970	0.687375	0.79745	0.73797		0.97388	0.42187	0.73797	0.48662	0.79745	1
Purg	971	0.687812	0.66605	0.243232		0.86513	0.11391	0.243232	0.37104	0.66605	1
Mbnl3	972	0.689688	0.37363	0.111107		0.75834	0.046598	0.111107	0.16709	0.37363	1
Pabpc5	973	0.690437	0.86176	0.229954		0.85956	0.10744	0.229954	0.55315	0.86176	1
Hnrnpd	974	0.69075	0.5145	0.484613		0.93852	0.26115	0.484613	0.23487	0.5145	1
Nsun2	975	0.691375	0.58258	0.442067		0.92969	0.23037	0.442067	0.27964	0.58258	1
Lrrc59	976	0.693	0.85154	0.268051		0.87695	0.12717	0.268051	0.53784	0.85154	1
Tcf25	977	0.6945	0.87782	0.694974		0.96917	0.39227	0.694974	0.57387	0.87782	1
Cryz	978	0.696313	0.82055	1		0.99964	0.92649	1	0.50384	0.82055	1
Flnc	979	0.698937	0.6876	1		0.99846	0.80477	1	0.39925	0.6876	1
Enox1	980	0.701187	0.47103	0.871394		0.98212	0.51606	0.871394	0.21125	0.47103	1
Irak4	981	0.704125	0.39936	1		0.99842	0.80121	1	0.17895	0.39936	1
Eif2a	982	0.706125	0.9935	0.982144		0.98864	0.61493	0.982144	0.89781	0.9935	1
Larp4b	983	0.707437	0.66605	1		0.99057	0.63931	1	0.3725	0.66605	1
Rbm34	984	0.7075	0.85154	0.204055		0.83804	0.094205	0.204055	0.54153	0.85154	1
Tex13a	985	0.709437	0.035421	0.841172		0.97902	0.48835	0.841172	0.013624	0.035421	1
Zc3h12a	986	0.710063	0.53492	0.664631		0.96677	0.37441	0.664631	0.25387	0.53492	1
Il2	987	0.71475	0.90645	0.542418		0.94918	0.29682	0.542418	0.62763	0.90645	1
Foxp3	988	0.717437	0.6876	0.850081		0.98002	0.49777	0.850081	0.39785	0.6876	1
Ranbp6	989	0.719	0.018892	0.080604		0.73741	0.033182	0.080604	0.0092235	0.018892	1
Trim25	990	0.719562	0.58258	0.06161		0.6746	0.02437	0.06161	0.2824	0.58258	1
Lsm14a	991	0.722313	0.74526	0.850081		0.98003	0.49777	0.850081	0.46424	0.74526	1
Hspg2	992	0.724125	0.9843	1		0.99923	0.87235	1	0.85165	0.9843	1
Gtpbp2	993	0.725562	0.42384	1		0.99921	0.86925	1	0.18944	0.42384	1
Scaf11	994	0.728062	0.71473	0.153725		0.80724	0.068408	0.153725	0.44054	0.71473	1
Peg10	995	0.729875	0.15002	0.850081		0.97956	0.49776	0.850081	0.076858	0.15002	1
Ncf1	996	0.730812	0.6348	1		0.99762	0.76049	1	0.33653	0.6348	1
Gtpbp1	997	0.732125	0.92733	1		0.99318	0.66603	1	0.67548	0.92733	1
Srpk2	998	0.73425	0.80231	1		0.99614	0.71897	1	0.48825	0.80231	1
Gtf2i	999	0.735313	0.60946	0.596261		0.95832	0.32993	0.596261	0.311	0.60946	1
Sarnp	1000	0.738938	0.77798	0.139439		0.78923	0.060424	0.139439	0.47471	0.77798	1
Mecp2	1001	0.740375	0.66605	0.850081		0.98025	0.49777	0.850081	0.36614	0.66605	1
Ybx3	1002	0.743875	0.10067	1		0.99997	0.98808	1	0.060176	0.10067	1
Ociad1	1003	0.748563	0.97788	0.217144		0.8551	0.10133	0.217144	0.81254	0.97788	1
Nfatc1	1004	0.748812	0.65818	0.436181		0.9277	0.22536	0.436181	0.34872	0.65818	1
Pabpc1l	1005	0.75075	0.39936	0.871394		0.98157	0.51605	0.871394	0.17584	0.39936	1
R3hdm2	1006	0.754062	0.54485	0.626855		0.96349	0.35069	0.626855	0.25841	0.54485	1
Fndc3b	1007	0.754812	0.53491	0.146796		0.79961	0.06459	0.146796	0.24643	0.53491	1
Aff3	1008	0.756437	0.9766	0.484613		0.93923	0.26115	0.484613	0.80823	0.9766	1
Plec	1009	0.758125	0.6876	0.141171		0.79395	0.061801	0.141171	0.39219	0.6876	1
Abcf2	1010	0.758125	0.96284	1		0.99976	0.94032	1	0.75316	0.96284	1
Gm10352	1011	0.75875	0.50415	0.769749		0.97515	0.44132	0.769749	0.22785	0.50415	1
Adarb2	1012	0.762312	0.6876	0.348129		0.91186	0.17232	0.348129	0.39502	0.6876	1
Pa2g4	1013	0.76525	0.97308	0.542418		0.94857	0.29682	0.542418	0.79269	0.97308	1
Rbm43	1014	0.765687	0.9524	0.985013		0.98918	0.61946	0.985013	0.72753	0.9524	1
Nfatc4	1015	0.766937	0.58259	0.487113		0.94066	0.26385	0.487113	0.29331	0.58259	1
Cstf2t	1016	0.767563	0.58258	0.893002		0.98605	0.5482	0.893002	0.2802	0.58258	1
Igf2r	1017	0.769813	0.47103	1		0.99505	0.68857	1	0.21185	0.47103	1
Zcchc13	1018	0.770625	0.61804	0.884608		0.98398	0.5342	0.884608	0.31733	0.61804	1
Prpf40b	1019	0.770812	0.37362	0.878073		0.9831	0.52489	0.878073	0.16646	0.37362	1
Ptbp3	1020	0.771625	0.96498	0.778326		0.9773	0.4484	0.778326	0.75971	0.96498	1
Fastkd3	1021	0.772562	0.90873	0.454824		0.93255	0.23954	0.454824	0.62946	0.90873	1
H2afy2	1022	0.773625	0.87783	0.884608		0.98421	0.53421	0.884608	0.57832	0.87783	1
Stau2	1023	0.7745	0.27669	1		0.99451	0.68068	1	0.13252	0.27669	1
G3bp1	1024	0.775188	0.1989	1		0.99824	0.79355	1	0.092595	0.1989	1
Rbm46	1025	0.777	0.8966	0.294378		0.8939	0.14195	0.294378	0.60027	0.8966	1
Ppig	1026	0.7795	0.61804	0.264933		0.87631	0.12511	0.264933	0.31523	0.61804	1
Nupl2	1027	0.781375	0.96498	0.862261		0.98095	0.50682	0.862261	0.76358	0.96498	1
Dzip1l	1028	0.782188	0.27669	0.91565		0.98715	0.56668	0.91565	0.13447	0.27669	1
Nanos1	1029	0.784125	0.54486	0.905682		0.98657	0.558	0.905682	0.26236	0.54486	1
Elavl2	1030	0.78475	0.95108	1		0.99969	0.92835	1	0.72383	0.95108	1
Pspc1	1031	0.787062	0.54485	0.880735		0.98385	0.52942	0.880735	0.25671	0.54485	1
Eif1ax	1032	0.789062	0.60945	0.697172		0.97052	0.39584	0.697172	0.30568	0.60945	1
Ythdc2	1033	0.79025	0.018892	1		0.99757	0.75312	1	0.010692	0.018892	1
Ptcd2	1034	0.790625	0.94099	0.626855		0.96371	0.35069	0.626855	0.71197	0.94099	1
Xpo4	1035	0.79325	0.68062	1		0.99936	0.89238	1	0.38887	0.68062	1
Prkcq	1036	0.7935	0.66605	0.391089		0.92239	0.19923	0.391089	0.36219	0.66605	1
Lgals3	1037	0.794	0.47103	0.89103		0.9851	0.54353	0.89103	0.21364	0.47103	1
Hdlbp	1038	0.794187	0.73335	0.599415		0.96237	0.33334	0.599415	0.45573	0.73335	1
Cwc27	1039	0.7945	0.75088	0.353067		0.91478	0.17555	0.353067	0.46635	0.75088	1
Pus7	1040	0.795062	0.92539	0.153725		0.80465	0.068402	0.153725	0.67413	0.92539	1
Dhx29	1041	0.795312	0.15002	0.291717		0.89173	0.1397	0.291717	0.07202	0.15002	1
Rbfox2	1042	0.79775	0.94099	0.404939		0.92482	0.20786	0.404939	0.7071	0.94099	1
Atxn2	1043	0.799125	0.90873	0.626855		0.96323	0.35068	0.626855	0.62991	0.90873	1
BC005561	1044	0.79975	0.5547	0.874722		0.98256	0.52045	0.874722	0.27577	0.5547	1
Hnrnpa2b1	1045	0.800125	0.41161	1		0.99751	0.75312	1	0.18514	0.41161	1
Phrf1	1046	0.804563	0.66605	1		0.99508	0.68857	1	0.35823	0.66605	1
Clk4	1047	0.804625	0.051988	0.332418		0.90702	0.16289	0.332418	0.019463	0.051988	1
Dzip1	1048	0.809	0.52479	1		0.99999	0.99484	1	0.24182	0.52479	1
Upf2	1049	0.809688	0.16652	0.454824		0.9331	0.23954	0.454824	0.084415	0.16652	1
Zmat3	1050	0.810937	0.66605	0.454824		0.93279	0.23954	0.454824	0.35972	0.66605	1
Spats2	1051	0.811	0.62663	0.551387		0.9532	0.30296	0.551387	0.32725	0.62663	1
Ddx17	1052	0.812188	0.5547	1		0.99948	0.90973	1	0.27633	0.5547	1
Khdrbs3	1053	0.813312	0.58259	1		0.99818	0.78996	1	0.29818	0.58259	1
Fto	1054	0.8135	0.72112	4.8e-05		0.065418	1.3751e-05	4.8e-05	0.44753	0.72112	1
Card11	1055	0.813875	0.92733	0.998405		0.98987	0.63177	0.998405	0.6853	0.92733	1
Dnajc1	1056	0.8195	0.051988	0.630708		0.96454	0.3539	0.630708	0.022371	0.051988	1
Gcn1l1	1057	0.821437	0.50414	0.469388		0.93644	0.25008	0.469388	0.22609	0.50414	1
Trip12	1058	0.825	0.23037	0.204055		0.83288	0.0942	0.204055	0.11939	0.23037	1
Ddx6	1059	0.827438	0.78813	0.139268		0.78851	0.060272	0.139268	0.48008	0.78813	1
Park7	1060	0.829875	0.66605	0.599415		0.96243	0.33334	0.599415	0.36318	0.66605	1
Pacsin2	1061	0.830688	0.58259	0.998405		0.98954	0.63176	0.998405	0.29548	0.58259	1
Fastkd2	1062	0.83325	0.44784	0.546183		0.95239	0.29979	0.546183	0.20283	0.44784	1
Pabpn1l	1063	0.833313	0.084282	0.348129		0.9114	0.17232	0.348129	0.045357	0.084282	1
Tbx21	1064	0.837	0.051994	1		0.99556	0.70393	1	0.026718	0.051994	1
Apobec1	1065	0.840875	0.10067	1		0.99527	0.69222	1	0.061576	0.10067	1
Ckap4	1066	0.841875	0.94099	0.89103		0.98505	0.54353	0.89103	0.70587	0.94099	1
Rbpms2	1067	0.843938	0.084282	1		0.99804	0.78619	1	0.047487	0.084282	1
Pabpc4l	1068	0.847625	0.62663	1		0.99964	0.92649	1	0.33294	0.62663	1
Gsr	1069	0.849187	0.43593	0.723298		0.97243	0.41227	0.723298	0.19494	0.43593	1
Efhd2	1070	0.849437	0.49326	1		0.99251	0.65451	1	0.219	0.49326	1
St13	1071	0.849625	0.8966	1		0.99129	0.64708	1	0.59472	0.8966	1
Zc3h15	1072	0.850688	0.69466	0.153725		0.8054	0.068402	0.153725	0.42136	0.69466	1
Akap8	1073	0.854188	0.47103	0.888111		0.98427	0.53878	0.888111	0.21245	0.47103	1
Tex13b	1074	0.854812	0.29104	0.985013		0.98893	0.61946	0.985013	0.13772	0.29104	1
Raly	1075	0.855	0.91542	0.630708		0.96413	0.35389	0.630708	0.64434	0.91542	1
Cat	1076	0.855125	0.85843	0.574312		0.95445	0.31619	0.574312	0.54664	0.85843	1
Pdia4	1077	0.8565	0.6876	0.841172		0.97899	0.48834	0.841172	0.40855	0.6876	1
Fastkd5	1078	0.857625	0.91956	0.944081		0.98812	0.589	0.944081	0.65699	0.91956	1
Alyref2	1079	0.8625	0.8966	0.06462		0.67949	0.025597	0.06462	0.60189	0.8966	1
Ipo9	1080	0.864687	0.96057	1		0.99723	0.74548	1	0.74946	0.96057	1
Rrbp1	1081	0.866812	0.70836	1		0.99331	0.6695	1	0.4379	0.70836	1
Hmces	1082	0.867875	0.5547	0.402294		0.92334	0.20539	0.402294	0.27133	0.5547	1
Ccdc124	1083	0.867937	0.91756	0.442067		0.93	0.23037	0.442067	0.65043	0.91756	1
Rbms1	1084	0.871562	0.66605	0.893002		0.98564	0.5482	0.893002	0.37832	0.66605	1
Hnrnpa3	1085	0.880125	0.90645	0.73797		0.97357	0.42187	0.73797	0.6258	0.90645	1
Tppp3	1086	0.88275	0.96892	0.205609		0.83851	0.095151	0.205609	0.77096	0.96892	1
P4hb	1087	0.884875	0.5248	0.02426		0.53329	0.0088146	0.02426	0.24356	0.5248	1
Tnrc6a	1088	0.888813	0.6876	1		0.9993	0.88977	1	0.41499	0.6876	1
Tsc1	1089	0.890438	0.035421	1		0.99879	0.82003	1	0.012891	0.035421	1
Lcp2	1090	0.898875	0.85154	0.774082		0.97557	0.44467	0.774082	0.54042	0.85154	1
Khsrp	1091	0.900375	0.92156	1		0.99987	0.96034	1	0.66344	0.92156	1
Ahnak	1092	0.901438	0.51451	1		0.99193	0.65076	1	0.24067	0.51451	1
Macf1	1093	0.903563	0.051994	0.871394		0.98161	0.51605	0.871394	0.030328	0.051994	1
Ranbp17	1094	0.904375	0.33357	1		0.99916	0.86615	1	0.14611	0.33357	1
Carhsp1	1095	0.908312	0.23037	0.893002		0.98592	0.5482	0.893002	0.11674	0.23037	1
Mov10	1096	0.908687	0.91317	0.944081		0.98789	0.589	0.944081	0.63308	0.91317	1
Raver2	1097	0.909	0.74525	1		0.99226	0.65076	1	0.46382	0.74525	1
Ern2	1098	0.909937	0.53491	1		0.99844	0.80477	1	0.24758	0.53491	1
Pcnp	1099	0.91375	0.62663	1		0.99033	0.6393	1	0.33036	0.62663	1
Myef2	1100	0.914813	0.27669	0.321551		0.90513	0.15685	0.321551	0.13186	0.27669	1
Rorc	1101	0.915437	0.6876	1		0.99905	0.85301	1	0.41864	0.6876	1
Rbmx	1102	0.921187	0.0036276	1		0.9983	0.79754	1	0.0011109	0.0036276	1
Anp32b	1103	0.922375	0.73947	1e-05		0.025995	2.7503e-06	1e-05	0.46	0.73947	1
Zcchc3	1104	0.926688	0.33358	0.888111		0.98431	0.53878	0.888111	0.15698	0.33358	1
Gfm2	1105	0.927812	0.72111	1		0.99139	0.64708	1	0.44317	0.72111	1
Aco1	1106	0.931312	0.93941	1		0.99867	0.816	1	0.70191	0.93941	1
Gm9833	1107	0.933	0.97588	1		0.99037	0.6393	1	0.80536	0.97588	1
Elavl4	1108	0.933875	0.68062	0.442067		0.92911	0.23036	0.442067	0.38839	0.68062	1
Dsp	1109	0.935062	0.65818	0.130536		0.78123	0.05613	0.130536	0.3462	0.65818	1
2210010C04Rik	1110	0.936375	0.65059	0.380554		0.92053	0.19323	0.380554	0.34316	0.65059	1
Rag1	1111	0.9365	0.95858	1		0.99376	0.66951	1	0.74386	0.95858	1
Bicc1	1112	0.937625	0.44784	0.316543		0.9041	0.15405	0.316543	0.20041	0.44784	1
Parp12	1113	0.940188	0.9738	0.353067		0.91313	0.17555	0.353067	0.80021	0.9738	1
Cdk13	1114	0.9435	0.91318	1		0.99109	0.64707	1	0.64229	0.91318	1
Bclaf1	1115	0.943625	0.33358	0.900314		0.98621	0.55319	0.900314	0.15634	0.33358	1
Gigyf1	1116	0.944125	0.90146	0.630708		0.96387	0.35389	0.630708	0.61652	0.90146	1
Zc3h12b	1117	0.944625	0.70151	0.658963		0.96602	0.37085	0.658963	0.42272	0.70151	1
R3hdm1	1118	0.949563	0.87137	1		0.99963	0.92265	1	0.55885	0.87137	1
Papolb	1119	0.951375	0.051988	1		0.99921	0.86925	1	0.023822	0.051988	1
Samd4	1120	0.951687	0.54485	1		0.99791	0.7827	1	0.25614	0.54485	1
Akap17b	1121	0.952188	0.66605	1		0.9998	0.94623	1	0.37396	0.66605	1
Rbfox1	1122	0.953937	0.58259	1		0.99953	0.91421	1	0.29223	0.58259	1
Plcg1	1123	0.960625	0.65818	0.850081		0.98031	0.49777	0.850081	0.34771	0.65818	1
Pcbp1	1124	0.960938	0.23037	0.466212		0.9349	0.24735	0.466212	0.11409	0.23037	1
Rrp1b	1125	0.9645	0.816	1		0.9984	0.80121	1	0.4935	0.816	1
Eif4g3	1126	0.965688	0.10067	1		0.99625	0.71898	1	0.062276	0.10067	1
Cpeb1	1127	0.966688	0.85154	1		0.99582	0.71145	1	0.53189	0.85154	1
Gcfc2	1128	0.967125	0.1989	0.348129		0.91033	0.17232	0.348129	0.10071	0.1989	1
Adad1	1129	0.9685	0.87463	0.454824		0.93154	0.23819	0.454824	0.56133	0.87463	1
Hnrnph3	1130	0.971375	0.084282	0.204055		0.83594	0.094205	0.204055	0.046067	0.084282	1
Ctnnb1	1131	0.971438	0.6876	0.89103		0.98513	0.54353	0.89103	0.40531	0.6876	1
Dlg1	1132	0.971562	0.97788	0.250006		0.87089	0.11778	0.250006	0.81353	0.97788	1
Grb7	1133	0.972125	0.6876	1		0.9992	0.86925	1	0.40902	0.6876	1
Prdx6	1134	0.977375	0.43593	1		0.99907	0.85301	1	0.19067	0.43593	1
Nxt2	1135	0.981812	0.72731	4.8e-05		0.066463	1.3751e-05	4.8e-05	0.45229	0.72731	1
Rrp8	1136	0.983812	0.54486	0.250006		0.87084	0.11778	0.250006	0.26461	0.54486	1
Nxf7	1137	0.984125	0.53491	1		0.99925	0.87534	1	0.2493	0.53491	1
Ythdf1	1138	0.984312	0.10067	1		0.99568	0.70764	1	0.060876	0.10067	1
Twf2	1139	0.991062	0.50414	0.23603		0.86098	0.11041	0.23603	0.2255	0.50414	1
Cdkn1b	1140	0.991187	0.83248	1		0.99957	0.91839	1	0.51167	0.83248	1
Pum1	1141	0.992	0.91318	1e-05		0.045357	2.7503e-06	1e-05	0.63964	0.91318	1
Spats2l	1142	0.992375	0.77314	0.436181		0.92774	0.22536	0.436181	0.47263	0.77314	1
Dcp2	1143	0.994125	0.53491	0.599415		0.96161	0.33334	0.599415	0.24701	0.53491	1
Ufl1	1144	0.994437	0.85154	0.91565		0.98711	0.56668	0.91565	0.53264	0.85154	1
Bach1	1145	0.99725	0.6876	0.73797		0.97376	0.42187	0.73797	0.39549	0.6876	1
Khnyn	1146	1.00313	0.92156	0.874722		0.9829	0.52046	0.874722	0.66538	0.92156	1
Cisd1	1147	1.00469	0.4821	1		0.99881	0.82003	1	0.21662	0.4821	1
Csde1	1148	1.00537	0.018886	0.185327		0.82225	0.084524	0.185327	0.0055433	0.018886	1
Stau1	1149	1.00537	0.96498	1		0.99939	0.89238	1	0.75992	0.96498	1
Tefm	1150	1.00631	0.39936	0.120402		0.7751	0.051438	0.120402	0.18205	0.39936	1
Flnb	1151	1.01137	0.0036221	0.880735		0.98374	0.52942	0.880735	0.00088293	0.0036221	1
Prrc2c	1152	1.01381	0.29104	1		0.99469	0.68857	1	0.13837	0.29104	1
Rbm45	1153	1.01519	0.62663	1		0.99584	0.71145	1	0.32518	0.62663	1
Utp14b	1154	1.01556	0.66605	0.822624		0.97819	0.47575	0.822624	0.37201	0.66605	1
Pan2	1155	1.02056	0.1989	0.878073		0.98312	0.52489	0.878073	0.091236	0.1989	1
Secisbp2l	1156	1.02081	0.91955	0.268051		0.87978	0.12718	0.268051	0.65614	0.91955	1
Atxn1	1157	1.02081	0.15002	1		0.99363	0.66951	1	0.073405	0.15002	1
Zfp36l1	1158	1.02206	0.5547	0.404939		0.92581	0.20787	0.404939	0.27244	0.5547	1
Pabpc6	1159	1.02913	0.94099	1		0.99859	0.81224	1	0.71076	0.94099	1
Nr0b1	1160	1.03187	0.66605	1		0.99865	0.81225	1	0.37055	0.66605	1
Trnau1ap	1161	1.03287	0.85154	1		0.99839	0.80121	1	0.53077	0.85154	1
2410004B18Rik	1162	1.03606	0.084282	1		0.99777	0.77913	1	0.049612	0.084282	1
Ifng	1163	1.03781	0.50415	1		0.9993	0.88977	1	0.23019	0.50415	1
Fam46b	1164	1.03969	0.66605	1		0.99791	0.7827	1	0.37299	0.66605	1
Pdia3	1165	1.04119	0.5145	0.442067		0.93038	0.23037	0.442067	0.23195	0.5145	1
Rnf17	1166	1.04212	0.47103	0.998405		0.98962	0.63176	0.998405	0.20825	0.47103	1
Rnmt	1167	1.04238	0.1989	1		0.99993	0.9766	1	0.1034	0.1989	1
Rbm5	1168	1.04281	0.92921	0.037227		0.59102	0.014079	0.037227	0.6923	0.92921	1
Lsm14b	1169	1.046	0.62663	0.723298		0.9728	0.41228	0.723298	0.32933	0.62663	1
Cnn3	1170	1.0545	0.6876	0.91565		0.9872	0.56669	0.91565	0.41682	0.6876	1
Ddx50	1171	1.05588	0.39936	0.605072		0.96257	0.33682	0.605072	0.17085	0.39936	1
Dcp1b	1172	1.05619	0.86505	1		0.99988	0.96143	1	0.55529	0.86505	1
Eif5a2	1173	1.06556	0.73946	0.849086		0.97915	0.49341	0.849086	0.45957	0.73946	1
Apex1	1174	1.06781	0.51451	1		0.99429	0.68068	1	0.23777	0.51451	1
Upf3a	1175	1.07006	0.44784	0.303117		0.89931	0.14667	0.303117	0.1989	0.44784	1
Eef2k	1176	1.07163	0.8966	1		0.99092	0.64327	1	0.59406	0.8966	1
Rc3h2	1177	1.0735	0.1989	1		0.99954	0.91634	1	0.10876	0.1989	1
G3bp2	1178	1.0755	0.6876	0.60748		0.9628	0.3385	0.60748	0.40392	0.6876	1
Rbfox3	1179	1.07575	0.60039	0.822624		0.9783	0.47575	0.822624	0.30355	0.60039	1
Zrsr2	1180	1.08344	0.16652	0.538581		0.94701	0.29383	0.538581	0.081673	0.16652	1
Prkdc	1181	1.08844	0.92156	1		0.99459	0.68479	1	0.66511	0.92156	1
Tmpo	1182	1.08969	0.051994	1		0.99955	0.91634	1	0.028885	0.051994	1
Tnrc6c	1183	1.09163	0.23037	0.697172		0.97059	0.39584	0.697172	0.1174	0.23037	1
Zfp318	1184	1.09631	0.70836	0.585757		0.95657	0.32347	0.585757	0.43635	0.70836	1
Rbmxl2	1185	1.09844	0.084277	1		0.99815	0.78995	1	0.041798	0.084277	1
Dusp11	1186	1.10119	0.39936	0.189385		0.82369	0.086796	0.189385	0.18019	0.39936	1
Rsrc1	1187	1.1025	0.1989	1		0.9994	0.89238	1	0.093273	0.1989	1
Rbpms	1188	1.10481	0.051988	0.871394		0.98201	0.51606	0.871394	0.023097	0.051988	1
Dis3l2	1189	1.10563	0.79284	0.911948		0.98678	0.56237	0.911948	0.485	0.79284	1
Nova1	1190	1.10806	0.58258	0.378239		0.92003	0.19079	0.378239	0.28706	0.58258	1
Aff1	1191	1.11081	0.85843	1		0.99894	0.83814	1	0.54701	0.85843	1
Ctif	1192	1.11375	0.82456	1		0.99969	0.92835	1	0.50777	0.82456	1
Ctnna1	1193	1.11969	0.084282	0.989406		0.98925	0.62443	0.989406	0.05032	0.084282	1
Zfp385a	1194	1.12219	0.82056	1		0.99409	0.68067	1	0.50542	0.82056	1
Casp3	1195	1.12488	0.29104	0.944081		0.98808	0.589	0.944081	0.13707	0.29104	1
Celf3	1196	1.13	0.73947	0.880735		0.98374	0.52942	0.880735	0.46085	0.73947	1
Xpo7	1197	1.13125	0.1989	1		0.99988	0.9624	1	0.10742	0.1989	1
Irak3	1198	1.1335	0.89661	0.250006		0.87056	0.11778	0.250006	0.60544	0.89661	1
Hnrnpul2	1199	1.13794	0.65059	0.774082		0.9757	0.44467	0.774082	0.34367	0.65059	1
Dzip3	1200	1.13831	0.88642	1		0.99216	0.65076	1	0.58676	0.88642	1
Smg8	1201	1.14112	0.62663	0.10492		0.75173	0.0436	0.10492	0.32205	0.62663	1
Rag2	1202	1.14219	0.8966	0.404939		0.92397	0.20786	0.404939	0.59995	0.8966	1
Gm21704	1203	1.15394	0.44784	1		0.99922	0.87234	1	0.20132	0.44784	1
Edc3	1204	1.15825	0.76754	0.874722		0.98275	0.52046	0.874722	0.47096	0.76754	1
Tarbp1	1205	1.16325	0.39936	1		0.99951	0.91193	1	0.17957	0.39936	1
Dhx40	1206	1.16413	0.96497	1		0.99975	0.94032	1	0.75536	0.96497	1
Rbm41	1207	1.16456	0.34678	1		0.99974	0.93858	1	0.16015	0.34678	1
Pura	1208	1.16962	0.24656	0.723298		0.97314	0.41228	0.723298	0.12203	0.24656	1
Rcc2	1209	1.17056	0.57357	1		0.99994	0.98039	1	0.27854	0.57357	1
Enox2	1210	1.17813	0.85154	0.871394		0.98161	0.51605	0.871394	0.54116	0.85154	1
Rtn4	1211	1.17825	0.49326	1		0.99678	0.73435	1	0.22137	0.49326	1
Nxf3	1212	1.18156	0.66605	1		0.99987	0.96035	1	0.37639	0.66605	1
Bclaf3	1213	1.18794	0.9235	1e-05		0.037869	2.7503e-06	1e-05	0.67196	0.9235	1
Nfatc2	1214	1.18844	0.36029	1		0.99593	0.71145	1	0.16268	0.36029	1
Tdrd3	1215	1.19094	0.34678	0.942141		0.98782	0.58465	0.942141	0.15951	0.34678	1
Angel2	1216	1.19169	0.65818	1		0.99997	0.99085	1	0.34569	0.65818	1
Nkrf	1217	1.19325	0.084277	0.982144		0.98853	0.61493	0.982144	0.037511	0.084277	1
Gm21677	1218	1.20681	0.49326	1		0.99857	0.8085	1	0.21781	0.49326	1
Pten	1219	1.20694	0.89661	1		0.99632	0.72676	1	0.60415	0.89661	1
Calr	1220	1.20706	0.018886	1		0.99997	0.99108	1	0.0062803	0.018886	1
Pan3	1221	1.21713	0.85154	1		0.99979	0.94489	1	0.53114	0.85154	1
Prdx3	1222	1.21825	0.61804	0.880735		0.98383	0.52942	0.880735	0.31681	0.61804	1
Ythdf3	1223	1.21913	0.47103	0.89103		0.98471	0.54352	0.89103	0.20885	0.47103	1
Mtif3	1224	1.2245	0.58258	1		0.99753	0.75312	1	0.28075	0.58258	1
A1cf	1225	1.235	0.084282	4.8e-05		0.054907	1.3751e-05	4.8e-05	0.048904	0.084282	1
Eif2ak3	1226	1.2415	0.51451	1		0.99956	0.91634	1	0.23864	0.51451	1
Dazl	1227	1.25144	0.15002	1e-05		0.025995	2.7503e-06	1e-05	0.074787	0.15002	1
2002-09-01	1228	1.25156	0.34679	0.189385		0.82435	0.086801	0.189385	0.16141	0.34679	1
Rbms2	1229	1.2525	0.47103	1		0.99985	0.9557	1	0.20765	0.47103	1
Ralyl	1230	1.25337	0.62663	1		0.99045	0.63931	1	0.32309	0.62663	1
Dek	1231	1.25513	0.88642	0.989406		0.98928	0.62443	0.989406	0.58239	0.88642	1
Dnajc8	1232	1.25594	0.58258	1		0.99797	0.78618	1	0.28295	0.58258	1
Nfe2l2	1233	1.26038	0.33358	1		0.99085	0.64326	1	0.15316	0.33358	1
Rbm26	1234	1.26131	0.27669	0.850081		0.98029	0.49777	0.850081	0.13577	0.27669	1
Atxn1l	1235	1.2645	0.8444	0.778326		0.97698	0.4484	0.778326	0.51939	0.8444	1
Fam98a	1236	1.28125	0.84791	1		0.99864	0.81225	1	0.527	0.84791	1
Patl2	1237	1.28512	0.77798	0.294378		0.89251	0.14195	0.294378	0.47429	0.77798	1
Ikzf3	1238	1.28694	0.23037	1		0.99996	0.9873	1	0.11542	0.23037	1
Lbr	1239	1.29569	0.60945	0.893002		0.98597	0.5482	0.893002	0.30515	0.60945	1
AI837181	1240	1.30137	0.55469	0.069903		0.69595	0.028034	0.069903	0.26686	0.55469	1
Rdx	1241	1.30787	0.90145	1		0.99551	0.70392	1	0.61496	0.90145	1
Lin28b	1242	1.31025	0.58258	0.546183		0.95205	0.29979	0.546183	0.28787	0.58258	1
Cmss1	1243	1.31156	0.39936	1		0.99995	0.98425	1	0.17022	0.39936	1
Ppfibp1	1244	1.31256	0.66605	0.89103		0.98471	0.54352	0.89103	0.35723	0.66605	1
Mbnl2	1245	1.31419	0.39936	1		0.99965	0.9265	1	0.1696	0.39936	1
Ptbp2	1246	1.31781	0.73334	1		0.99915	0.86307	1	0.45401	0.73334	1
Zranb2	1247	1.327	0.084277	0.874722		0.98285	0.52046	0.874722	0.038942	0.084277	1
Apobec4	1248	1.32706	0.50415	1		0.99989	0.96461	1	0.23078	0.50415	1
Eif1a	1249	1.32969	0.70835	0.380554		0.92138	0.19324	0.380554	0.42475	0.70835	1
Snrpn	1250	1.3385	0.33358	0.599415		0.96161	0.33334	0.599415	0.15443	0.33358	1
Scaf4	1251	1.33881	0.39936	0.922874		0.98744	0.57167	0.922874	0.17398	0.39936	1
Cnp	1252	1.33963	0.66605	0.760843		0.97443	0.43537	0.760843	0.36565	0.66605	1
Hnrnpdl	1253	1.34125	0.58258	0.880735		0.98346	0.52941	0.880735	0.28842	0.58258	1
Zc3h12c	1254	1.35012	0.85843	1		0.99396	0.68067	1	0.54737	0.85843	1
Acadm	1255	1.35488	0.47103	1		0.9996	0.9184	1	0.21424	0.47103	1
Larp7	1256	1.3555	0.62663	1		0.99997	0.98878	1	0.32361	0.62663	1
Gm21708	1257	1.37256	0.16652	0.107008		0.75682	0.044706	0.107008	0.085099	0.16652	1
Rbm20	1258	1.37719	0.70835	0.89103		0.98507	0.54353	0.89103	0.43125	0.70835	1
Ddx3y	1259	1.37975	0.5145	1		0.99915	0.86307	1	0.2337	0.5145	1
Vapa	1260	1.38075	0.035421	0.067799		0.6872	0.027082	0.067799	0.015086	0.035421	1
Nfatc3	1261	1.38569	0.50414	0.778326		0.97736	0.4484	0.778326	0.22726	0.50414	1
Pdcd4	1262	1.38906	0.88906	0.944081		0.98794	0.589	0.944081	0.5891	0.88906	1
Atxn2l	1263	1.38975	0.29104	1		0.99159	0.65076	1	0.13966	0.29104	1
Cnot7	1264	1.39294	0.0049862	1		0.99917	0.86925	1	0.0016276	0.0049862	1
Arhgef28	1265	1.40031	0.39936	1		0.99978	0.94344	1	0.17148	0.39936	1
Adarb1	1266	1.40544	0.58258	0.856642		0.98049	0.50209	0.856642	0.28514	0.58258	1
Rbm6	1267	1.41131	0.58259	0.509582		0.94251	0.27687	0.509582	0.29114	0.58259	1
Dppa5a	1268	1.41412	0.15002	1e-05		0.0070169	2.7503e-06	1e-05	0.076168	0.15002	1
Upf3b	1269	1.43412	0.5248	0.694974		0.96863	0.39227	0.694974	0.24298	0.5248	1
Zcchc11	1270	1.4345	0.16652	1		0.99981	0.94803	1	0.083045	0.16652	1
Klf6	1271	1.43863	0.33357	1		0.99738	0.74961	1	0.14675	0.33357	1
Sub1	1272	1.46175	0.0086496	3e-05		0.050673	8.2508e-06	3e-05	0.002038	0.0086496	1
Map4k1	1273	1.46875	0.66605	1		0.99989	0.9624	1	0.3788	0.66605	1
Apobec2	1274	1.49144	0.084282	1		0.99961	0.92054	1	0.048196	0.084282	1
Mov10l1	1275	1.51694	0.54486	0.850081		0.97929	0.49776	0.850081	0.26349	0.54486	1
Ezr	1276	1.54544	0.44784	1		0.99627	0.7228	1	0.20223	0.44784	1
Ifit2	1277	1.55187	0.43593	0.469388		0.93605	0.25007	0.469388	0.19616	0.43593	1
Rbm3-ps	1278	1.55262	0.43593	0.332418		0.90697	0.16289	0.332418	0.19372	0.43593	1
Wbp4	1279	1.5585	0.43593	0.888111		0.98437	0.53879	0.888111	0.19189	0.43593	1
Gm10256	1280	1.57425	0.53491	1		0.99912	0.85645	1	0.24586	0.53491	1
Rbmy	1281	1.59056	0.72112	1		0.99973	0.93537	1	0.44579	0.72112	1
Fam46d	1282	1.62994	0.10066	1e-05		0.00030702	2.7503e-06	1e-05	0.057369	0.10066	1
Boll	1283	1.63937	0.013122	1		0.99923	0.87534	1	0.0033293	0.013122	1
Irf8	1284	1.68662	0.1989	1		1	0.99847	1	0.099361	0.1989	1
Fmr1	1285	1.71012	0.54485	1		0.99999	0.99502	1	0.25954	0.54485	1
Auh	1286	1.71256	0.035426	1		0.99719	0.74547	1	0.016547	0.035426	1
Fubp1	1287	1.72475	0.65818	1		0.99998	0.99109	1	0.35474	0.65818	1
L1td1	1288	1.74669	0.18273	1		0.99997	0.99108	1	0.088513	0.18273	1
Zc3h12d	1289	1.74694	0.1989	1		0.99874	0.82002	1	0.091915	0.1989	1
Tial1	1290	1.77013	0.24656	4.8e-05		0.06994	1.3751e-05	4.8e-05	0.12137	0.24656	1
Gm21693	1291	1.8	0.15002	1		0.99991	0.96839	1	0.06994	0.15002	1
Gm4064	1292	1.81387	0.37362	3e-05		0.050673	8.2508e-06	3e-05	0.16583	0.37362	1
Caprin2	1293	1.823	0.13371	1		0.99907	0.85301	1	0.067855	0.13371	1
Gm3376	1294	1.88512	0.33357	1		1	0.99991	1	0.14418	0.33357	1
Bcl2l11	1295	1.95744	0.010789	1		0.99996	0.98647	1	0.0024452	0.010789	1
Fam46c	1296	1.99262	0.10067	1		1	0.99908	1	0.063673	0.10067	1
Caprin1	1297	2.12106	0.18273	1		0.99997	0.98844	1	0.089194	0.18273	1
Msn	1298	2.13031	0.084277	1		0.99651	0.73073	1	0.041084	0.084277	1
Trp53	1299	2.92606	2.7503e-06	0.002475		1	1	1	9.2653e-12	2.7503e-06	0.002475
Rc3h1	1300	3.26762	2.7503e-06	0.002475		0.99984	0.95186	1	4.1207e-10	2.7503e-06	0.002475

## Sheet: 1D - CD138+ accumulation
Gene name	Rank	Z score (lfc)	p-value	FDR		neg|score	neg|p-value	neg|fdr	pos|score	pos|p-value	pos|fdr
Prdm1	1	-21.2818	2.75e-06	0.00019		4.25e-28	2.75e-06	0.00019	1	1	1
Atp2a2	2	-10.8224	2.75e-06	0.00019		3.86e-18	2.75e-06	0.00019	1	1	1
Hnrnpu	3	-9.21655	2.75e-06	0.00019		6.5e-08	2.75e-06	0.00019	0.99194	0.96509	1
Irf4	4	-7.38364	2.75e-06	0.00019		9.93e-09	2.75e-06	0.00019	0.99787	0.99002	1
Dbr1	5	-6.95836	2.75e-06	0.00019		1.42e-13	2.75e-06	0.00019	1	1	1
Huwe1	6	-6.76618	2.75e-06	0.00019		1.25e-11	2.75e-06	0.00019	0.99986	0.99947	1
Rptor	7	-6.31109	2.75e-06	0.00019		1.26e-07	2.75e-06	0.00019	0.95452	0.84983	1
Cdk13	8	-6.20236	2.75e-06	0.00019		1.11e-16	2.75e-06	0.00019	1	1	1
Sec61b	9	-6.18673	2.75e-06	0.00019		3.46e-09	2.75e-06	0.00019	1	1	1
Pde12	10	-6.04764	2.75e-06	0.00019		1.93e-10	2.75e-06	0.00019	1	1	1
Ipo9	11	-5.98364	2.75e-06	0.00019		9.27e-12	2.75e-06	0.00019	0.99985	0.99944	1
Ythdf2	12	-5.85927	2.75e-06	0.00019		2.56e-08	2.75e-06	0.00019	1	1	1
Rictor	13	-5.61218	2.75e-06	0.00019		3.51e-11	2.75e-06	0.00019	0.98139	0.93315	1
Patl1	14	-5.61182	2.75e-06	0.00019		7.44e-11	2.75e-06	0.00019	1	1	1
Prrc2a	15	-5.54873	2.75e-06	0.00019		8.65e-09	2.75e-06	0.00019	0.99982	0.99935	1
Akt1	16	-5.21436	2.75e-06	0.00019		2.52e-10	2.75e-06	0.00019	1	1	1
Hspe1	17	-5.20618	0.00023927	0.009788		3.69e-05	0.00023927	0.009788	1	1	1
Eif4h	18	-5.16709	2.75e-06	0.00019		1.24e-08	2.75e-06	0.00019	1	1	1
Yars	19	-5.15709	6.88e-05	0.003173		1.33e-05	6.88e-05	0.003173	0.99979	0.99928	1
Sec61a1	20	-4.80618	0.00038779	0.014245		6.64e-05	0.00038779	0.014245	0.99395	0.96982	1
Tufm	21	-4.78982	2.75e-06	0.00019		2.88e-07	2.75e-06	0.00019	0.99749	0.98906	1
Cnbp	22	-4.77182	2.75e-06	0.00019		8.04e-09	2.75e-06	0.00019	0.99757	0.98907	1
Jmjd6	23	-4.76491	2.75e-06	0.00019		1.38e-10	2.75e-06	0.00019	1	1	1
Eif2b1	24	-4.67091	0.00059681	0.020269		0.0001214	0.00059681	0.020269	0.99999	0.99998	1
Eef1g	25	-4.34273	2.75e-06	0.00019		2.42e-08	2.75e-06	0.00019	1	1	1
Elac2	26	-4.12509	2.75e-06	0.00019		2.76e-07	2.75e-06	0.00019	0.99024	0.96406	1
Mrps27	27	-4.09491	2.75e-06	0.00019		3.22e-07	2.75e-06	0.00019	0.99996	0.99982	1
Bcl2l1	28	-4.07582	4.68e-05	0.002275		7.79e-06	4.68e-05	0.002275	0.99523	0.97659	1
Strap	29	-3.97073	3.03e-05	0.00165		3.48e-06	3.03e-05	0.00165	0.77666	0.58286	1
Akap8	30	-3.944	6.88e-05	0.003173		1.28e-05	6.88e-05	0.003173	0.98932	0.96185	1
Ythdf1	31	-3.91145	2.75e-06	0.00019		6.04e-09	2.75e-06	0.00019	1	1	1
Myc	32	-3.81127	0.013985	0.275882		0.0035792	0.013985	0.275882	0.84198	0.65785	1
Pabpc1	33	-3.782	0.045311	0.575815		0.014792	0.045311	0.575815	0.98388	0.94159	1
Mtrf1l	34	-3.77455	8.25e-06	0.00053		6.27e-07	8.25e-06	0.00053	0.862	0.66648	1
Csde1	35	-3.75182	0.00018427	0.008292		2.54e-05	0.00018427	0.008292	0.91398	0.74978	1
Oxsr1	36	-3.65327	0.0017409	0.05515		0.00032782	0.0017409	0.05515	0.99519	0.97594	1
Atp5a1	37	-3.63982	0.034557	0.493753		0.011644	0.034557	0.493753	0.99273	0.96605	1
Lrpprc	38	-3.63673	0.00026128	0.010224		4.57e-05	0.00026128	0.010224	0.99999	0.99997	1
Ssbp1	39	-3.63473	0.0055693	0.132686		0.001461	0.0055693	0.132686	0.99778	0.98935	1
Wnk1	40	-3.54873	0.0055748	0.132686		0.0015011	0.0055748	0.132686	0.91765	0.76767	1
Syncrip	41	-3.54309	8.25e-06	0.00053		6.87e-07	8.25e-06	0.00053	1	1	1
Supv3l1	42	-3.45691	0.0030886	0.089668		0.00070424	0.0030886	0.089668	0.97732	0.91603	1
Nomo1	43	-3.42236	4.68e-05	0.002275		8.91e-06	4.68e-05	0.002275	0.99999	1	1
Eif2b2	44	-3.4	0.0030886	0.089668		0.00070419	0.0030886	0.089668	0.9999	0.99972	1
Ywhae	45	-3.39764	1.93e-05	0.001118		1.03e-06	1.93e-05	0.001118	0.99999	1	1
Anp32b	46	-3.28782	4.68e-05	0.002275		1.18e-05	4.68e-05	0.002275	0.99988	0.99958	1
Celf2	47	-3.28291	0.00023377	0.009786		3.25e-05	0.00023377	0.009786	0.99588	0.98152	1
Ptcd3	48	-3.27127	0.0005253	0.01854		9.28e-05	0.0005253	0.01854	1	1	1
Manf	49	-3.22345	0.0030886	0.089668		0.00070198	0.0030886	0.089668	0.99144	0.96509	1
Yars2	50	-3.22182	0.0049092	0.128211		0.001256	0.0049092	0.128211	0.99971	0.99899	1
Tsfm	51	-3.22055	3.03e-05	0.00165		2.55e-06	3.03e-05	0.00165	0.99903	0.99615	1
Sec63	52	-3.20636	0.00066832	0.022277		0.00014068	0.00066832	0.022277	0.99999	1	1
Brd2	53	-3.18018	0.00059681	0.020269		0.00012254	0.00059681	0.020269	0.99995	0.99982	1
Dhx30	54	-3.17345	4.13e-05	0.002184		6.57e-06	4.13e-05	0.002184	0.98645	0.9528	1
Mbnl1	55	-3.16545	0.021207	0.369092		0.0063185	0.021207	0.369092	0.99322	0.967	1
Tars	56	-3.14364	0.033193	0.493753		0.010769	0.033193	0.493753	0.98785	0.95531	1
Ilf3	57	-3.114	2.75e-06	0.00019		1.58e-07	2.75e-06	0.00019	0.99798	0.99029	1
Nelfe	58	-3.09509	0.00029428	0.01127		5.27e-05	0.00029428	0.01127	0.50978	0.30614	0.853263
Mtif3	59	-3.06255	0.0039411	0.105881		0.00095496	0.0039411	0.105881	0.98039	0.92935	1
Tefm	60	-3.01782	1.93e-05	0.001118		1.1e-06	1.93e-05	0.001118	0.99972	0.999	1
Ddx28	61	-3.01327	1.38e-05	0.000854		7.28e-07	1.38e-05	0.000854	0.9965	0.98452	1
Cnot2	62	-3.00618	0.0055253	0.132686		0.0013921	0.0055253	0.132686	0.99995	0.99982	1
Luc7l2	63	-2.91764	0.0064384	0.146698		0.0017514	0.0064384	0.146698	0.9978	0.99002	1
Msn	64	-2.91655	0.00022827	0.009786		2.99e-05	0.00022827	0.009786	0.99673	0.98589	1
Pum1	65	-2.87291	2.75e-06	0.00019		1.54e-07	2.75e-06	0.00019	0.99516	0.97594	1
Eif4g2	66	-2.86055	0.0049147	0.128211		0.0012643	0.0049147	0.128211	0.9999	0.99968	1
Eif2b5	67	-2.82382	0.01354	0.275882		0.003343	0.01354	0.275882	0.99692	0.98662	1
Naca	68	-2.81673	0.034563	0.493753		0.011738	0.034563	0.493753	0.90011	0.719	1
Ociad1	69	-2.78964	0.015135	0.28992		0.0042671	0.015135	0.28992	0.99205	0.96604	1
Atp1a1	70	-2.74218	0.010872	0.232968		0.0026744	0.010872	0.232968	0.9791	0.92028	1
Thrap3	71	-2.71473	0.01398	0.275882		0.0034209	0.01398	0.275882	0.93211	0.8059	1
Ankrd17	72	-2.71473	0.0005198	0.01854		8.9e-05	0.0005198	0.01854	0.99275	0.96605	1
Fubp1	73	-2.71145	0.00024477	0.009791		4.13e-05	0.00024477	0.009791	0.98927	0.96185	1
Rpusd4	74	-2.69364	0.0017464	0.05515		0.00033044	0.0017464	0.05515	0.99997	0.99994	1
Mbnl2	75	-2.61727	0.0036331	0.100609		0.00091354	0.0036331	0.100609	0.39413	0.20413	0.660882
Secisbp2l	76	-2.60036	0.0084241	0.184919		0.0021238	0.0084241	0.184919	0.86238	0.66648	1
Enox2	77	-2.58764	0.02173	0.369092		0.0065258	0.02173	0.369092	0.60163	0.36066	0.928745
Slc25a5	78	-2.54255	0.0056023	0.132686		0.0015269	0.0056023	0.132686	0.9957	0.9804	1
Tfam	79	-2.52127	0.017676	0.318168		0.0053864	0.017676	0.318168	0.99744	0.98906	1
Ptcd1	80	-2.51418	0.002852	0.088511		0.00066878	0.002852	0.088511	0.99998	0.99994	1
Eif2b3	81	-2.50473	0.0055253	0.132686		0.001383	0.0055253	0.132686	0.99937	0.99784	1
Nmt1	82	-2.50164	0.095608	0.977807		0.034828	0.095608	0.977807	0.99768	0.98935	1
Paip1	83	-2.49418	0.018793	0.334918		0.0057537	0.018793	0.334918	0.97526	0.90933	1
Hspd1	84	-2.44145	0.010454	0.226709		0.0025628	0.010454	0.226709	0.26766	0.10318	0.405541
Irak3	85	-2.43455	0.00038779	0.014245		6.49e-05	0.00038779	0.014245	0.982	0.93316	1
Cnot3	86	-2.42	0.0036331	0.100609		0.0009117	0.0036331	0.100609	0.99815	0.99123	1
Kars	87	-2.40964	0.022577	0.376283		0.0069187	0.022577	0.376283	0.99987	0.99954	1
Angel1	88	-2.40382	0.00023377	0.009786		3.23e-05	0.00023377	0.009786	0.99745	0.98906	1
Dhx15	89	-2.34436	0.094277	0.977807		0.034068	0.094277	0.977807	0.90422	0.72359	1
Vapa	90	-2.33909	0.01514	0.28992		0.0045618	0.01514	0.28992	0.93769	0.81854	1
Trip12	91	-2.29236	0.0075	0.166789		0.0019566	0.0075	0.166789	0.97703	0.91603	1
Pnpt1	92	-2.26636	0.10085	0.984164		0.03718	0.10085	0.984164	0.65987	0.43034	1
Hnrnpll	93	-2.25473	0.0055693	0.132686		0.0014535	0.0055693	0.132686	0.95866	0.85339	1
Ythdf3	94	-2.23982	0.016669	0.30318		0.0050538	0.016669	0.30318	0.97583	0.90933	1
Srsf1	95	-2.18436	0.7672	1		0.58537	0.7672	1	0.92364	0.79748	1
Cstf2	96	-2.16982	0.0039411	0.105881		0.00095969	0.0039411	0.105881	0.7096	0.52606	1
Hnrnpab	97	-2.15382	0.0053878	0.132686		0.0013533	0.0053878	0.132686	0.86883	0.67528	1
Agfg1	98	-2.15127	0.015514	0.293955		0.0046475	0.015514	0.293955	0.69133	0.4955	1
Mov10	99	-2.11655	0.0061579	0.14395		0.0016306	0.0061579	0.14395	0.94396	0.83108	1
Mrpl44	100	-2.11327	0.016669	0.30318		0.0050316	0.016669	0.30318	0.74239	0.56151	1
Tmed9	101	-2.09436	0.0031491	0.089973		0.00076665	0.0031491	0.089973	0.94566	0.83499	1
Wdr33	102	-2.08891	0.03223	0.483457		0.010571	0.03223	0.483457	0.99009	0.96297	1
Zc3h15	103	-2.08345	0.077544	0.856375		0.027475	0.077544	0.856375	0.97356	0.90432	1
Hic2	104	-2.06164	0.0075055	0.166789		0.0019664	0.0075055	0.166789	0.98498	0.94621	1
Eif2b4	105	-2.05836	0.10408	1		0.039127	0.10408	1	0.99929	0.99777	1
Clasp2	106	-2.05509	0.039486	0.546725		0.013306	0.039486	0.546725	0.5837	0.34964	0.918761
Vars	107	-2.04382	0.10169	0.984164		0.038142	0.10169	0.984164	0.99179	0.96509	1
Zc3h3	108	-2.03345	0.059073	0.723345		0.018555	0.059073	0.723345	0.99139	0.96509	1
Sars	109	-2.02727	0.18274	1		0.078262	0.18274	1	0.93158	0.80589	1
Srsf9	110	-2.016	0.00072882	0.023852		0.00015545	0.00072882	0.023852	0.87317	0.67528	1
Polrmt	111	-1.98436	0.04574	0.575815		0.01516	0.04574	0.575815	0.90251	0.72359	1
Btf3	112	-1.98164	0.11013	1		0.041262	0.11013	1	0.99437	0.97321	1
Larp1	113	-1.97382	0.023985	0.396085		0.0072811	0.023985	0.396085	0.9449	0.83109	1
Pdcd4	114	-1.96345	0.084876	0.920345		0.030814	0.084876	0.920345	0.709	0.52119	1
Pan2	115	-1.95873	0.021202	0.369092		0.0062805	0.021202	0.369092	0.99875	0.99429	1
Dppa5a	116	-1.92036	0.07755	0.856375		0.027998	0.07755	0.856375	0.28627	0.10631	0.410668
Ndufa4	117	-1.91582	0.01354	0.275882		0.0033353	0.01354	0.275882	0.9856	0.94903	1
Cpsf1	118	-1.91455	0.3097	1		0.14306	0.3097	1	0.94788	0.84254	1
Pan3	119	-1.91073	0.0064329	0.146698		0.0016913	0.0064329	0.146698	0.97894	0.92027	1
Mettl3	120	-1.89727	0.02618	0.424538		0.008323	0.02618	0.424538	0.99864	0.99335	1
Nfatc1	121	-1.86509	0.045745	0.575815		0.015481	0.045745	0.575815	0.91734	0.76767	1
Ewsr1	122	-1.85109	0.11013	1		0.041894	0.11013	1	0.93138	0.80589	1
Vps4b	123	-1.84545	0.1017	0.984164		0.038633	0.1017	0.984164	0.81309	0.61803	1
Fadd	124	-1.84436	0.01398	0.275882		0.0034113	0.01398	0.275882	0.97781	0.91604	1
Bzw1	125	-1.84073	0.011559	0.241941		0.0028467	0.011559	0.241941	0.9938	0.96878	1
Gm9833	126	-1.81451	0.031862	0.483457		0.0099869	0.031862	0.483457	0.97871	0.92027	1
Rnpc3	127	-1.80453	0.59066	1		0.35793	0.59066	1	0.98576	0.94903	1
Gfm1	128	-1.79838	0.014101	0.275882		0.0036958	0.014101	0.275882	0.99551	0.9804	1
Alg13	129	-1.77918	0.07118	0.82961		0.023762	0.07118	0.82961	0.70789	0.52119	1
Bcl2	130	-1.77875	0.043991	0.575815		0.014418	0.043991	0.575815	0.86799	0.67528	1
Gapdh	131	-1.7636	0.03409	0.493753		0.011263	0.03409	0.493753	0.99893	0.9952	1
Trub2	132	-1.75982	0.027439	0.440992		0.0083973	0.027439	0.440992	0.80677	0.60951	1
Skiv2l	133	-1.75385	0.1017	0.984164		0.038414	0.1017	0.984164	0.99231	0.96604	1
Tcea1	134	-1.74953	0.031482	0.483457		0.0097636	0.031482	0.483457	0.9997	0.99889	1
Ddx43	135	-1.74662	0.032225	0.483457		0.010309	0.032225	0.483457	0.94413	0.83109	1
Sfswap	136	-1.74573	0.10169	0.984164		0.038197	0.10169	0.984164	0.90749	0.7413	1
Cwc27	137	-1.73858	0.042346	0.575815		0.013727	0.042346	0.575815	0.96371	0.87022	1
Sumo1	138	-1.73796	0.31943	1		0.15098	0.31943	1	0.85999	0.66648	1
Celf1	139	-1.72129	0.074475	0.832636		0.026279	0.074475	0.832636	0.99008	0.96297	1
Slc25a3	140	-1.6912	0.14879	1		0.061578	0.14879	1	0.9926	0.96605	1
Ubap2l	141	-1.68925	0.2118	1		0.09178	0.2118	1	0.99206	0.96604	1
Nfatc2	142	-1.68213	0.015723	0.294812		0.0048998	0.015723	0.294812	0.99756	0.98907	1
Ddx3y	143	-1.67913	0.068655	0.813021		0.021673	0.068655	0.813021	0.91438	0.74978	1
Zfp706	144	-1.67389	0.022164	0.37286		0.0068668	0.022164	0.37286	0.94916	0.84628	1
Top3b	145	-1.65856	0.042869	0.575815		0.013967	0.042869	0.575815	0.99947	0.99835	1
Ppih	146	-1.65369	0.093534	0.977807		0.033988	0.093534	0.977807	0.99983	0.99939	1
Mettl14	147	-1.64171	0.29268	1		0.13137	0.29268	1	0.93296	0.8059	1
Pabpn1	148	-1.63165	0.32356	1		0.15617	0.32356	1	0.97373	0.90432	1
Khdc1c	149	-1.62236	0.025916	0.424077		0.0080847	0.025916	0.424077	0.33084	0.13093	0.479041
Smg7	150	-1.62205	0.071174	0.82961		0.023449	0.071174	0.82961	0.94228	0.82708	1
Fam46d	151	-1.61009	0.095602	0.977807		0.034573	0.095602	0.977807	0.96522	0.87623	1
Eno1	152	-1.60211	0.092748	0.977807		0.033221	0.092748	0.977807	0.95251	0.84982	1
Pkm	153	-1.60033	0.097016	0.984164		0.035032	0.097016	0.984164	0.99987	0.99955	1
Itgal	154	-1.59875	0.044706	0.575815		0.014513	0.044706	0.575815	0.51328	0.30614	0.853263
Cnot6l	155	-1.57835	0.034557	0.493753		0.011675	0.034557	0.493753	0.99861	0.99334	1
Swt1	156	-1.57751	0.02805	0.446815		0.0085286	0.02805	0.446815	0.61564	0.38219	0.968951
Eif2a	157	-1.57416	0.038606	0.538683		0.012799	0.038606	0.538683	0.73997	0.5615	1
Nanos2	158	-1.57302	0.48349	1		0.26577	0.48349	1	0.99996	0.99988	1
Eif2d	159	-1.57267	0.045311	0.575815		0.01482	0.045311	0.575815	0.98228	0.93316	1
Wtap	160	-1.57065	0.33038	1		0.16331	0.33038	1	0.99488	0.97462	1
Zcchc8	161	-1.56945	0.045745	0.575815		0.015476	0.045745	0.575815	0.39789	0.21251	0.676433
Pabpc5	162	-1.56067	0.11632	1		0.042812	0.11632	1	0.98978	0.96296	1
Pdia6	163	-1.53796	0.28702	1		0.12668	0.28702	1	0.99652	0.98452	1
Eif4a2	164	-1.53747	0.11899	1		0.043061	0.11899	1	0.99887	0.99481	1
Hadha	165	-1.53625	0.53911	1		0.30209	0.53911	1	0.64557	0.40883	1
Zcchc13	166	-1.53545	0.11992	1		0.044609	0.11992	1	0.96507	0.87623	1
Rbm7	167	-1.52271	0.26496	1		0.12139	0.26496	1	0.98146	0.93315	1
Esrp1	168	-1.52045	0.2118	1		0.091639	0.2118	1	0.99754	0.98907	1
Surf2	169	-1.51084	0.099343	0.984164		0.036433	0.099343	0.984164	0.73535	0.55167	1
Esrp2	170	-1.50238	0.03223	0.483457		0.010588	0.03223	0.483457	0.99566	0.9804	1
Ddx1	171	-1.495	0.19862	1		0.08213	0.19862	1	0.99894	0.9955	1
Ptcd2	172	-1.48713	0.18499	1		0.078779	0.18499	1	0.61658	0.3822	0.968951
Rbms1	173	-1.46947	0.049739	0.621734		0.016064	0.049739	0.621734	0.99989	0.99967	1
C1qbp	174	-1.46755	0.59067	1		0.36223	0.59067	1	0.93348	0.8059	1
Noa1	175	-1.46362	0.0029895	0.089668		0.00068808	0.0029895	0.089668	0.9443	0.83109	1
Copa	176	-1.45451	0.57798	1		0.35318	0.57798	1	0.73441	0.55167	1
Mbnl3	177	-1.45053	0.2372	1		0.10856	0.2372	1	0.67902	0.44984	1
Raver2	178	-1.44711	0.17926	1		0.077128	0.17926	1	0.9612	0.86049	1
Guf1	179	-1.44324	0.27598	1		0.12241	0.27598	1	0.75311	0.56567	1
Helz	180	-1.44225	0.037979	0.534073		0.0127	0.037979	0.534073	0.99817	0.99154	1
Plekha7	181	-1.44067	0.03223	0.483457		0.010539	0.03223	0.483457	0.9765	0.91156	1
Drg1	182	-1.43362	0.072225	0.82961		0.024077	0.072225	0.82961	0.99891	0.99498	1
Rbm20	183	-1.42384	0.12297	1		0.046627	0.12297	1	0.55951	0.32754	0.878658
Ctnnb1	184	-1.41704	0.32355	1		0.15361	0.32355	1	0.90879	0.7413	1
Samd4	185	-1.40425	0.091944	0.977807		0.032949	0.091944	0.977807	0.97683	0.91388	1
Phb	186	-1.404	0.55747	1		0.32522	0.55747	1	0.87037	0.67528	1
Fastkd5	187	-1.40245	0.39544	1		0.20811	0.39544	1	0.97612	0.90933	1
Syk	188	-1.39095	0.10594	1		0.039951	0.10594	1	0.74019	0.5615	1
Scaf1	189	-1.39027	0.61952	1		0.38716	0.61952	1	0.70786	0.52119	1
Rbm5	190	-1.38878	0.9003	1		0.83596	0.9003	1	0.98548	0.94768	1
Gm21704	191	-1.38133	0.42956	1		0.22317	0.42956	1	0.95322	0.84982	1
Srek1	192	-1.3712	0.23281	1		0.10643	0.23281	1	0.99141	0.96509	1
Nme1	193	-1.37109	0.29815	1		0.13492	0.29815	1	0.77239	0.57882	1
Papolb	194	-1.37104	0.29815	1		0.1359	0.29815	1	0.97705	0.91603	1
Hnrnpd	195	-1.3652	0.11899	1		0.044129	0.11899	1	0.95755	0.84983	1
Prrc2c	196	-1.36478	0.34021	1		0.17148	0.34021	1	0.99606	0.98307	1
Stat4	197	-1.36158	0.12649	1		0.049539	0.12649	1	0.98168	0.93315	1
Khdc1a	198	-1.36085	0.72961	1		0.52972	0.72961	1	0.95411	0.84983	1
Eif4enif1	199	-1.35849	0.21179	1		0.090405	0.21179	1	0.99569	0.9804	1
Eif4b	200	-1.35684	0.11222	1		0.042184	0.11222	1	0.99424	0.97169	1
Ahcyl1	201	-1.35605	0.073738	0.82961		0.025067	0.073738	0.82961	0.98587	0.94903	1
Pspc1	202	-1.344	0.15028	1		0.06257	0.15028	1	0.66948	0.43034	1
Pebp1	203	-1.3302	0.10169	0.984164		0.037495	0.10169	0.984164	0.1958	0.064667	0.288836
Mif4gd	204	-1.32227	0.4679	1		0.25199	0.4679	1	0.7029	0.51171	1
Npm3	205	-1.31829	0.11899	1		0.043355	0.11899	1	0.93191	0.8059	1
Aldoa	206	-1.31442	0.74952	1		0.55482	0.74952	1	0.64802	0.41307	1
Qk	207	-1.31282	0.04574	0.575815		0.015018	0.04574	0.575815	0.95794	0.85339	1
Ndufa9	208	-1.3116	0.11992	1		0.044861	0.11992	1	0.95355	0.84982	1
Stau2	209	-1.30855	0.26495	1		0.1194	0.26495	1	0.86012	0.66648	1
Papola	210	-1.30809	0.42744	1		0.21962	0.42744	1	0.9982	0.99154	1
Jakmip1	211	-1.30778	0.11993	1		0.045907	0.11993	1	0.7107	0.52606	1
Bop1	212	-1.3056	0.60494	1		0.37303	0.60494	1	0.20044	0.072935	0.321008
Abcf2	213	-1.30333	0.04574	0.575815		0.015129	0.04574	0.575815	0.89992	0.719	1
Sdhc	214	-1.29885	0.26037	1		0.11618	0.26037	1	0.43751	0.23672	0.717347
Farsb	215	-1.29753	0.082797	0.908748		0.029208	0.082797	0.908748	0.90187	0.71901	1
Bak1	216	-1.29751	0.31133	1		0.14548	0.31133	1	0.91702	0.76766	1
Fmr1	217	-1.29427	0.2118	1		0.091928	0.2118	1	0.60133	0.36066	0.928745
Ngrn	218	-1.29295	0.073738	0.82961		0.024514	0.073738	0.82961	0.81938	0.62698	1
Mtdh	219	-1.29024	0.12861	1		0.050187	0.12861	1	0.93973	0.82707	1
Cpsf4	220	-1.28616	0.32533	1		0.15835	0.32533	1	0.43336	0.234	0.713903
Fto	221	-1.28391	0.063078	0.756931		0.019206	0.063078	0.756931	0.95086	0.84982	1
Rrp1b	222	-1.283	0.23282	1		0.10673	0.23282	1	0.82112	0.63579	1
Tarbp2	223	-1.28218	0.29815	1		0.13563	0.29815	1	0.98261	0.93316	1
Myo18a	224	-1.2742	0.093534	0.977807		0.034001	0.093534	0.977807	0.34168	0.14722	0.528932
Zcchc11	225	-1.26867	0.59067	1		0.35951	0.59067	1	0.99358	0.9679	1
Phrf1	226	-1.261	0.847	1		0.68457	0.847	1	0.66875	0.43034	1
Smg5	227	-1.26071	0.17231	1		0.07356	0.17231	1	0.96846	0.88786	1
Parp1	228	-1.24895	0.11992	1		0.04485	0.11992	1	0.51974	0.31286	0.853263
Rsrc1	229	-1.236	0.47823	1		0.26127	0.47823	1	0.87614	0.6795	1
Ssr1	230	-1.23591	0.51061	1		0.2884	0.51061	1	0.9536	0.84983	1
Myh10	231	-1.23515	0.30418	1		0.13883	0.30418	1	0.75874	0.57	1
Rtcb	232	-1.23436	0.13989	1		0.058259	0.13989	1	0.98775	0.95407	1
Vcp	233	-1.22911	0.30969	1		0.14161	0.30969	1	0.67257	0.43506	1
A1cf	234	-1.22715	0.11899	1		0.043711	0.11899	1	0.5684	0.33856	0.901495
Rap1a	235	-1.20251	0.34432	1		0.17738	0.34432	1	0.80541	0.60481	1
Tdrd3	236	-1.20064	0.2079	1		0.086867	0.2079	1	0.8849	0.69735	1
Dis3l	237	-1.19893	0.55747	1		0.32572	0.55747	1	0.69996	0.50675	1
Irak4	238	-1.19598	0.35554	1		0.18394	0.35554	1	0.53269	0.31286	0.853263
Slirp	239	-1.193	0.099337	0.984164		0.036232	0.099337	0.984164	0.84296	0.65785	1
Poldip3	240	-1.18956	0.57798	1		0.34208	0.57798	1	0.84888	0.65785	1
Bclaf3	241	-1.18175	0.28985	1		0.12796	0.28985	1	0.59543	0.36066	0.928745
Nanos1	242	-1.18044	0.32724	1		0.16027	0.32724	1	0.89709	0.71033	1
Ddx3x	243	-1.17149	0.12976	1		0.050579	0.12976	1	0.21486	0.092021	0.388846
Tbrg4	244	-1.16622	0.073738	0.82961		0.024484	0.073738	0.82961	0.98867	0.95971	1
Park7	245	-1.16402	0.55747	1		0.32684	0.55747	1	0.97206	0.89918	1
Map3k14	246	-1.1604	0.30419	1		0.13967	0.30419	1	0.9338	0.8059	1
H2afy2	247	-1.16002	0.03409	0.493753		0.011309	0.03409	0.493753	0.99717	0.98784	1
Cat	248	-1.15249	0.66043	1		0.45417	0.66043	1	0.78179	0.5918	1
Cnot7	249	-1.15147	0.51773	1		0.2895	0.51773	1	0.96561	0.87911	1
Gm21677	250	-1.14853	0.32533	1		0.1582	0.32533	1	0.50861	0.30614	0.853263
Myd88	251	-1.14638	0.13989	1		0.058223	0.13989	1	0.76485	0.57	1
Pprc1	252	-1.1304	0.53911	1		0.30226	0.53911	1	0.75646	0.57	1
Tubb4b	253	-1.12687	0.82911	1		0.66555	0.82911	1	0.80811	0.60951	1
Enox1	254	-1.12653	0.80534	1		0.63543	0.80534	1	0.61907	0.38598	0.971703
Mthfsd	255	-1.115	0.57798	1		0.3525	0.57798	1	0.4121	0.21683	0.676433
Hk2	256	-1.11047	0.063078	0.756931		0.019199	0.063078	0.756931	0.90503	0.72359	1
Khsrp	257	-1.10693	0.22606	1		0.10125	0.22606	1	0.94967	0.84982	1
Atp5b	258	-1.10251	0.12649	1		0.048911	0.12649	1	0.96108	0.857	1
Eif4g3	259	-1.09875	0.26037	1		0.11657	0.26037	1	0.98725	0.9528	1
Ppp1r10	260	-1.09698	0.32356	1		0.15642	0.32356	1	0.9199	0.78472	1
Igf2bp2	261	-1.09285	0.32355	1		0.15405	0.32355	1	0.61344	0.37531	0.956869
Mocs3	262	-1.07833	0.11632	1		0.042943	0.11632	1	0.98164	0.93315	1
Arhgef28	263	-1.07758	0.49178	1		0.27457	0.49178	1	0.58608	0.34964	0.918761
Fn1	264	-1.07709	0.21575	1		0.09425	0.21575	1	0.98722	0.9528	1
Nfx1	265	-1.07435	0.16499	1		0.070076	0.16499	1	0.99727	0.98837	1
Cpeb1	266	-1.07084	0.14878	1		0.06122	0.14878	1	0.95937	0.85339	1
Btk	267	-1.06864	0.31451	1		0.14667	0.31451	1	0.95751	0.84983	1
Cmtr1	268	-1.06855	0.063078	0.756931		0.019111	0.063078	0.756931	0.96011	0.85339	1
Khdc1b	269	-1.05771	0.14879	1		0.061795	0.14879	1	0.38784	0.19687	0.650223
Cnot4	270	-1.0572	0.26234	1		0.11721	0.26234	1	0.98236	0.93316	1
Wbp4	271	-1.05707	0.13808	1		0.055991	0.13808	1	0.98533	0.94621	1
Apobec1	272	-1.05231	0.76938	1		0.59292	0.76938	1	0.99096	0.96508	1
Nova1	273	-1.04858	0.48754	1		0.27006	0.48754	1	0.47101	0.25976	0.751703
Nfatc3	274	-1.04767	0.6269	1		0.41406	0.6269	1	0.58648	0.34964	0.918761
Atxn1	275	-1.03613	0.33038	1		0.16379	0.33038	1	0.99921	0.99708	1
R3hdm2	276	-1.02827	0.31943	1		0.14953	0.31943	1	0.57221	0.34211	0.906947
Ireb2	277	-1.02464	0.2079	1		0.087186	0.2079	1	0.8693	0.67528	1
Cpsf4l	278	-1.0194	0.66559	1		0.45799	0.66559	1	0.99561	0.9804	1
Rbmxl1	279	-1.00227	0.31943	1		0.14938	0.31943	1	0.21583	0.092021	0.388846
Gfm2	280	-1.00165	0.29268	1		0.1311	0.29268	1	0.72946	0.54627	1
Hnrnpul2	281	-0.999055	0.17731	1		0.076461	0.17731	1	0.778	0.58286	1
Hp1bp3	282	-0.997964	0.53911	1		0.30497	0.53911	1	0.96776	0.88488	1
Cdkn1a	283	-0.996691	0.31943	1		0.15214	0.31943	1	0.81762	0.6223	1
Nova2	284	-0.995055	0.26496	1		0.12061	0.26496	1	0.30305	0.11506	0.436008
Celf3	285	-0.993582	0.12649	1		0.049781	0.12649	1	0.823	0.6358	1
Macf1	286	-0.9814	0.27987	1		0.12531	0.27987	1	0.95966	0.85339	1
Ddx4	287	-0.979345	0.55747	1		0.32191	0.55747	1	0.91671	0.76339	1
Tln1	288	-0.978873	0.41136	1		0.21589	0.41136	1	0.44868	0.24769	0.73208
Zcrb1	289	-0.976673	0.12385	1		0.047249	0.12385	1	0.13218	0.027445	0.153897
Igf2bp3	290	-0.975745	0.62154	1		0.39306	0.62154	1	0.37218	0.1688	0.571159
Pgk1	291	-0.973182	0.19488	1		0.081274	0.19488	1	0.97288	0.89918	1
Elavl3	292	-0.9698	0.22606	1		0.10461	0.22606	1	0.98232	0.93316	1
Zfp207	293	-0.968964	0.63998	1		0.433	0.63998	1	0.8345	0.64924	1
Zrsr2	294	-0.967109	0.74708	1		0.55032	0.74708	1	0.55856	0.32754	0.878658
Snrpf	295	-0.958436	0.14879	1		0.062028	0.14879	1	0.28791	0.10631	0.410668
Smg8	296	-0.952182	0.56154	1		0.3294	0.56154	1	0.90104	0.71901	1
Sart1	297	-0.951182	0.847	1		0.69085	0.847	1	0.34495	0.15145	0.535597
Tmpo	298	-0.949109	0.80973	1		0.64566	0.80973	1	0.80524	0.60481	1
Sptbn1	299	-0.945473	0.53911	1		0.30342	0.53911	1	0.8445	0.65785	1
Gpx1	300	-0.944036	0.29268	1		0.13301	0.29268	1	0.95785	0.85339	1
Dicer1	301	-0.942545	0.31943	1		0.15054	0.31943	1	0.3366	0.1355	0.491766
Rbfox3	302	-0.939109	0.50194	1		0.28408	0.50194	1	0.96649	0.87912	1
Pcbp3	303	-0.934909	0.32533	1		0.1585	0.32533	1	0.45171	0.25188	0.733659
Hspa9	304	-0.927727	0.601	1		0.36698	0.601	1	0.68796	0.48495	1
Rbms3	305	-0.927145	0.64523	1		0.44015	0.64523	1	0.61669	0.3822	0.968951
Scaf8	306	-0.923036	0.26496	1		0.1211	0.26496	1	0.60709	0.3683	0.943024
Fip1l1	307	-0.922673	0.073738	0.82961		0.024352	0.073738	0.82961	0.88048	0.68833	1
Zfp318	308	-0.922491	0.58021	1		0.35476	0.58021	1	0.94667	0.8389	1
Rbm12b2	309	-0.917709	0.59067	1		0.36103	0.59067	1	0.27399	0.10459	0.406636
Zc3h7b	310	-0.913964	0.71733	1		0.51017	0.71733	1	0.71686	0.53658	1
Ccdc9	311	-0.911636	0.16623	1		0.071331	0.16623	1	0.64876	0.41307	1
Foxp3	312	-0.898164	0.89576	1		0.82853	0.89576	1	0.96816	0.88489	1
Adad1	313	-0.887164	0.22606	1		0.10086	0.22606	1	0.86655	0.67082	1
Angel2	314	-0.886382	0.56462	1		0.3311	0.56462	1	0.94324	0.83108	1
Fastkd2	315	-0.884982	0.42956	1		0.22489	0.42956	1	0.56782	0.33856	0.901495
Eral1	316	-0.880382	0.57798	1		0.35329	0.57798	1	0.97426	0.90432	1
Snrpn	317	-0.873745	0.39075	1		0.20388	0.39075	1	0.6668	0.43034	1
Paip2b	318	-0.873218	0.5976	1		0.36471	0.5976	1	0.71088	0.52607	1
Dst	319	-0.8694	0.85751	1		0.75248	0.85751	1	0.84352	0.65785	1
Rbm3-ps	320	-0.868764	0.23979	1		0.11078	0.23979	1	0.75479	0.57	1
Pdap1	321	-0.8686	0.86223	1		0.76242	0.86223	1	0.60033	0.36066	0.928745
Taco1	322	-0.868055	0.8238	1		0.66201	0.8238	1	0.98115	0.93315	1
Lat	323	-0.863218	0.17231	1		0.073595	0.17231	1	0.978	0.91604	1
Adar	324	-0.860018	0.021735	0.369092		0.0067806	0.021735	0.369092	0.79728	0.6048	1
Mki67	325	-0.858218	0.6269	1		0.41266	0.6269	1	0.31947	0.12044	0.45164
Zfp36l3	326	-0.856709	0.2079	1		0.086337	0.2079	1	0.89964	0.719	1
Pabpc4l	327	-0.8548	0.26495	1		0.11979	0.26495	1	0.87794	0.68383	1
Pcbp1	328	-0.850255	0.011372	0.240827		0.0028172	0.011372	0.240827	0.95378	0.84983	1
Lsm6	329	-0.848164	0.57798	1		0.34821	0.57798	1	0.70748	0.52119	1
Tbx21	330	-0.845618	0.847	1		0.68729	0.847	1	0.38222	0.17757	0.590811
Mdh2	331	-0.844891	0.021735	0.369092		0.0067922	0.021735	0.369092	0.98111	0.93315	1
Aco1	332	-0.8412	0.53911	1		0.30399	0.53911	1	0.57872	0.34963	0.918761
2210010C04Rik	333	-0.837964	0.89576	1		0.83004	0.89576	1	0.24589	0.098584	0.405541
Serpinh1	334	-0.837127	0.095602	0.977807		0.034692	0.095602	0.977807	0.66783	0.43034	1
Rbfox1	335	-0.835055	0.49178	1		0.27484	0.49178	1	0.5777	0.34212	0.906947
Zcchc6	336	-0.832945	0.71007	1		0.49946	0.71007	1	0.63133	0.39389	0.980643
Arcn1	337	-0.832927	0.45932	1		0.24646	0.45932	1	0.35415	0.15645	0.546833
Ythdc1	338	-0.832836	0.12862	1		0.050327	0.12862	1	0.94061	0.82707	1
Nol8	339	-0.831855	0.26235	1		0.11848	0.26235	1	0.93823	0.81855	1
Fxr1	340	-0.831564	0.85289	1		0.72085	0.85289	1	0.96667	0.87912	1
Rtf1	341	-0.826509	0.78511	1		0.61055	0.78511	1	0.2144	0.092021	0.388846
Zfp598	342	-0.822327	0.34432	1		0.17758	0.34432	1	0.8189	0.62698	1
Aff2	343	-0.820145	0.16198	1		0.067197	0.16198	1	0.99043	0.96508	1
Gm3376	344	-0.820109	0.92312	1		0.88458	0.92312	1	0.092361	0.017291	0.109206
Hspg2	345	-0.8192	0.31943	1		0.14836	0.31943	1	0.81842	0.62697	1
Pcf11	346	-0.814964	0.86837	1		0.78738	0.86837	1	0.64371	0.40883	1
Sf3b1	347	-0.8142	0.28702	1		0.12665	0.28702	1	0.43607	0.23672	0.717347
Larp1b	348	-0.813545	0.20965	1		0.088958	0.20965	1	0.97483	0.90698	1
Zc3h12a	349	-0.812327	0.26495	1		0.12	0.26495	1	0.97523	0.90933	1
Dhx36	350	-0.8066	0.15369	1		0.064981	0.15369	1	0.079624	0.016328	0.107132
Gm21693	351	-0.786982	0.224	1		0.097017	0.224	1	0.6234	0.38976	0.971716
Ddx31	352	-0.7782	0.48048	1		0.26336	0.48048	1	0.51599	0.31286	0.853263
Clk4	353	-0.778091	0.35554	1		0.18296	0.35554	1	0.89018	0.7017	1
Rdx	354	-0.775	0.78062	1		0.60226	0.78062	1	0.97643	0.91156	1
Thumpd1	355	-0.774018	0.60494	1		0.37378	0.60494	1	0.68666	0.48495	1
Acadm	356	-0.771782	0.79711	1		0.63036	0.79711	1	0.99796	0.99029	1
Dsp	357	-0.765309	0.75161	1		0.55856	0.75161	1	0.87569	0.6795	1
Surf6	358	-0.764309	0.3601	1		0.18666	0.3601	1	0.66015	0.43034	1
Sltm	359	-0.763055	0.19862	1		0.082342	0.19862	1	0.50939	0.30614	0.853263
Prdx6	360	-0.752636	0.75844	1		0.56416	0.75844	1	0.81826	0.62697	1
Ccar2	361	-0.747927	0.32355	1		0.15496	0.32355	1	0.99046	0.96508	1
Pum2	362	-0.742836	0.60873	1		0.38081	0.60873	1	0.47018	0.25976	0.751703
Srrm4	363	-0.739	0.34431	1		0.17525	0.34431	1	0.62121	0.38598	0.971703
Alkbh5	364	-0.734345	0.76719	1		0.57916	0.76719	1	0.76904	0.57	1
Mkrn3	365	-0.731582	0.57458	1		0.33605	0.57458	1	0.91032	0.74131	1
Ppid	366	-0.729982	0.12487	1		0.048276	0.12487	1	0.87971	0.68833	1
Ythdc2	367	-0.727018	0.29978	1		0.13674	0.29978	1	0.30313	0.11506	0.436008
Paip2	368	-0.721273	0.59066	1		0.35612	0.59066	1	0.88616	0.69735	1
Rbmxl2	369	-0.720418	0.53911	1		0.30675	0.53911	1	0.97325	0.90432	1
Ralyl	370	-0.720127	0.54735	1		0.31342	0.54735	1	0.70424	0.51639	1
Plec	371	-0.717873	0.28259	1		0.12593	0.28259	1	0.41097	0.21683	0.676433
Fubp3	372	-0.717145	0.7516	1		0.5582	0.7516	1	0.93943	0.82291	1
Sdad1	373	-0.714418	0.71981	1		0.51134	0.71981	1	0.77569	0.57883	1
Ripk3	374	-0.711036	0.12103	1		0.046194	0.12103	1	0.97064	0.89917	1
Eif5a2	375	-0.710891	0.29268	1		0.13319	0.29268	1	0.58821	0.35329	0.924325
Ccdc124	376	-0.7042	0.073743	0.82961		0.02551	0.073743	0.82961	0.39365	0.20057	0.654048
2002-09-01	377	-0.702545	0.29978	1		0.13648	0.29978	1	0.8173	0.6223	1
Ipo4	378	-0.699582	0.60873	1		0.37817	0.60873	1	0.80216	0.60481	1
Bid	379	-0.696527	0.057506	0.708972		0.017848	0.057506	0.708972	0.95552	0.84983	1
Fndc3b	380	-0.695891	0.57798	1		0.33965	0.57798	1	0.25447	0.10029	0.405541
Ranbp17	381	-0.695327	0.8306	1		0.67216	0.8306	1	0.97026	0.89368	1
Zc3h12c	382	-0.688491	0.73721	1		0.54122	0.73721	1	0.96663	0.87912	1
Rpusd3	383	-0.686509	0.65285	1		0.44497	0.65285	1	0.66763	0.43034	1
Dis3l2	384	-0.684109	0.3097	1		0.14315	0.3097	1	0.51121	0.30614	0.853263
Tppp3	385	-0.678873	0.69565	1		0.48837	0.69565	1	0.4399	0.24061	0.724271
Ufl1	386	-0.676709	0.68154	1		0.47287	0.68154	1	0.34167	0.14722	0.528932
Dus3l	387	-0.676709	0.27986	1		0.12458	0.27986	1	0.96449	0.87323	1
Ybx2	388	-0.674055	0.76938	1		0.58655	0.76938	1	0.93011	0.80589	1
Helz2	389	-0.671945	0.847	1		0.68874	0.847	1	0.79265	0.60039	1
Adad2	390	-0.670255	0.62154	1		0.39464	0.62154	1	0.95159	0.84982	1
Fastkd1	391	-0.667709	0.33038	1		0.16323	0.33038	1	0.99299	0.967	1
Dcp1b	392	-0.667455	0.57458	1		0.3365	0.57458	1	0.95042	0.84982	1
Ptbp1	393	-0.665455	0.23489	1		0.10792	0.23489	1	0.70672	0.52118	1
Eif1b	394	-0.664655	0.57798	1		0.3392	0.57798	1	0.40629	0.21473	0.676433
Tagln2	395	-0.664	0.47822	1		0.25844	0.47822	1	0.98881	0.95972	1
Eprs	396	-0.662073	0.65509	1		0.44671	0.65509	1	0.9822	0.93316	1
Rbpms	397	-0.661673	0.48754	1		0.27028	0.48754	1	0.94002	0.82707	1
Lin28b	398	-0.659782	0.85444	1		0.73283	0.85444	1	0.9725	0.89918	1
Rbmy	399	-0.653382	0.22606	1		0.10226	0.22606	1	0.82762	0.64924	1
Ywhaz	400	-0.651382	0.32356	1		0.15532	0.32356	1	0.98661	0.9528	1
Casp8	401	-0.648236	0.22606	1		0.098533	0.22606	1	0.8923	0.70605	1
Gcfc2	402	-0.647382	0.20383	1		0.084265	0.20383	1	0.89832	0.71033	1
Smndc1	403	-0.645964	0.66862	1		0.46288	0.66862	1	0.33459	0.13094	0.479041
Gdi2	404	-0.645145	0.83518	1		0.674	0.83518	1	0.6004	0.36066	0.928745
Sf3a1	405	-0.644509	0.73721	1		0.54061	0.73721	1	0.72367	0.54088	1
Plcg1	406	-0.642327	0.28985	1		0.12893	0.28985	1	0.68669	0.48495	1
Rnf17	407	-0.638218	0.49179	1		0.27702	0.49179	1	0.88627	0.69735	1
Tra2a	408	-0.636927	0.35554	1		0.18046	0.35554	1	0.96438	0.87322	1
Ddx50	409	-0.636909	0.28985	1		0.12962	0.28985	1	0.90458	0.72359	1
Ddx20	410	-0.636218	0.26037	1		0.1167	0.26037	1	0.27918	0.1046	0.406636
Hnrnph3	411	-0.6354	0.8238	1		0.66159	0.8238	1	0.88542	0.69735	1
Zc3h7a	412	-0.634509	0.60281	1		0.37152	0.60281	1	0.38073	0.17432	0.582147
Rpf2	413	-0.633945	0.39543	1		0.20497	0.39543	1	0.73197	0.55166	1
Lbr	414	-0.628236	0.76476	1		0.57749	0.76476	1	0.86642	0.67082	1
Nap1l4	415	-0.625909	0.31943	1		0.15244	0.31943	1	0.81292	0.61803	1
Samd4b	416	-0.616982	0.23979	1		0.11174	0.23979	1	0.97469	0.90698	1
Sub1	417	-0.615273	0.15028	1		0.062636	0.15028	1	0.26709	0.10318	0.405541
Srsf10	418	-0.614364	0.53911	1		0.30977	0.53911	1	0.98335	0.93681	1
Hmgb3	419	-0.613091	0.22606	1		0.099329	0.22606	1	0.42634	0.234	0.713903
Nfatc4	420	-0.611309	0.49179	1		0.27543	0.49179	1	0.93257	0.8059	1
Igf1r	421	-0.608273	0.847	1		0.69491	0.847	1	0.98481	0.94621	1
Cdv3	422	-0.608255	0.086284	0.930011		0.031496	0.086284	0.930011	0.91175	0.74131	1
Eif4e3	423	-0.607855	0.847	1		0.68967	0.847	1	0.48251	0.28322	0.814356
Arpc1b	424	-0.604964	0.92595	1		0.88886	0.92595	1	0.96253	0.87022	1
Luc7l	425	-0.602655	0.9003	1		0.83741	0.9003	1	0.80164	0.60481	1
Prpf40b	426	-0.601655	0.15844	1		0.066427	0.15844	1	0.9015	0.71901	1
Sf1	427	-0.601564	0.85444	1		0.7353	0.85444	1	0.21128	0.092021	0.388846
Ezr	428	-0.600709	0.11992	1		0.04437	0.11992	1	0.64845	0.41307	1
Fastkd3	429	-0.593655	0.34228	1		0.17471	0.34228	1	0.99638	0.98451	1
Tnpo2	430	-0.589491	0.26496	1		0.12018	0.26496	1	0.26881	0.10318	0.405541
Nxf7	431	-0.586345	0.71982	1		0.51406	0.71982	1	0.85289	0.66215	1
Rbm3	432	-0.581436	0.97422	1		0.96742	0.97422	1	0.157	0.038584	0.19843
Uhmk1	433	-0.5786	0.33037	1		0.16143	0.33037	1	0.94273	0.82708	1
Sap18	434	-0.575927	0.95871	1		0.94435	0.95871	1	0.97786	0.91604	1
Zfp326	435	-0.575291	0.57798	1		0.34371	0.57798	1	0.90067	0.71901	1
Anxa2	436	-0.571745	0.57798	1		0.34393	0.57798	1	0.92208	0.79748	1
Nkrf	437	-0.569545	0.601	1		0.36834	0.601	1	0.85486	0.66215	1
Eif4ebp1	438	-0.569491	0.24198	1		0.11344	0.24198	1	0.41844	0.21906	0.679848
Map4k1	439	-0.564491	0.43665	1		0.23069	0.43665	1	0.80558	0.60481	1
Setx	440	-0.564491	0.29978	1		0.13675	0.29978	1	0.80878	0.60952	1
Ifit2	441	-0.562236	0.40313	1		0.21013	0.40313	1	0.98816	0.95644	1
Zmat3	442	-0.562182	0.10594	1		0.039348	0.10594	1	0.96214	0.87022	1
Eif5a	443	-0.552836	0.43403	1		0.22847	0.43403	1	0.90715	0.7413	1
Eef1a2	444	-0.551655	0.72961	1		0.53354	0.72961	1	0.98691	0.9528	1
Cdkn1b	445	-0.548291	0.62154	1		0.38988	0.62154	1	0.82989	0.64924	1
Fam46b	446	-0.547618	0.33198	1		0.16847	0.33198	1	0.34523	0.15145	0.535597
Tarbp1	447	-0.547018	0.42956	1		0.22508	0.42956	1	0.8467	0.65785	1
Rc3h1	448	-0.546618	0.53295	1		0.29876	0.53295	1	0.95539	0.84983	1
Prkra	449	-0.546109	0.78511	1		0.61028	0.78511	1	0.33298	0.13094	0.479041
Papolg	450	-0.545782	0.62155	1		0.39803	0.62155	1	0.84588	0.65785	1
Mif	451	-0.536836	0.60099	1		0.36585	0.60099	1	0.46892	0.25976	0.751703
Ern1	452	-0.535364	0.042863	0.575815		0.013912	0.042863	0.575815	0.98188	0.93316	1
Flna	453	-0.535164	0.22606	1		0.10473	0.22606	1	0.7233	0.54088	1
Khnyn	454	-0.532836	0.16009	1		0.066592	0.16009	1	0.85758	0.66215	1
Smg6	455	-0.522691	0.27986	1		0.12425	0.27986	1	0.59838	0.36066	0.928745
Ube2l3	456	-0.521618	0.47822	1		0.25627	0.47822	1	0.18848	0.062962	0.287588
Igf2r	457	-0.519909	0.79711	1		0.62586	0.79711	1	0.94419	0.83109	1
Pabpc6	458	-0.512509	0.60495	1		0.37703	0.60495	1	0.7031	0.51171	1
Bicc1	459	-0.510491	0.93996	1		0.91679	0.93996	1	0.94199	0.82708	1
Nasp	460	-0.508018	0.68605	1		0.48464	0.68605	1	0.79444	0.60039	1
Dido1	461	-0.5048	0.29268	1		0.13244	0.29268	1	0.26508	0.10171	0.405541
St13	462	-0.503273	0.96622	1		0.95659	0.96622	1	0.95974	0.85339	1
Pym1	463	-0.499691	0.29815	1		0.13579	0.29815	1	0.17711	0.056345	0.267601
Map4	464	-0.499509	0.95976	1		0.94539	0.95976	1	0.35341	0.15645	0.546833
Rbm45	465	-0.499127	0.38856	1		0.20247	0.38856	1	0.85407	0.66215	1
Elavl4	466	-0.498145	0.57798	1		0.34876	0.57798	1	0.37018	0.16682	0.567622
Rbm18	467	-0.493727	0.95976	1		0.9455	0.95976	1	0.71468	0.53152	1
Safb	468	-0.486945	0.44202	1		0.23878	0.44202	1	0.43742	0.23672	0.717347
Gcn1l1	469	-0.486764	0.64192	1		0.43574	0.64192	1	0.97384	0.90432	1
Rars	470	-0.485145	0.68155	1		0.48064	0.68155	1	0.94809	0.84627	1
Idh3a	471	-0.476164	0.93352	1		0.90269	0.93352	1	0.59854	0.36066	0.928745
Rbm15b	472	-0.473909	0.57458	1		0.33695	0.57458	1	0.56	0.32754	0.878658
Rbm12	473	-0.469618	0.88236	1		0.81858	0.88236	1	0.50034	0.29833	0.849676
Ddx25	474	-0.463582	0.71982	1		0.51367	0.71982	1	0.93145	0.80589	1
Txnrd2	475	-0.462927	0.57086	1		0.33401	0.57086	1	0.64176	0.40882	1
Fxr2	476	-0.462582	0.33198	1		0.16962	0.33198	1	0.9226	0.79748	1
Exosc1	477	-0.461655	0.85289	1		0.72597	0.85289	1	0.51069	0.30614	0.853263
Cpeb3	478	-0.460836	0.97112	1		0.96561	0.97112	1	0.99847	0.99286	1
Casp3	479	-0.458509	0.95301	1		0.93031	0.95301	1	0.88803	0.69735	1
Tdrd7	480	-0.456436	0.74952	1		0.55535	0.74952	1	0.39419	0.20413	0.660882
Lmna	481	-0.456055	0.93995	1		0.91283	0.93995	1	0.87478	0.67528	1
Adarb2	482	-0.453345	0.21369	1		0.093793	0.21369	1	0.64888	0.41307	1
Rag2	483	-0.452782	0.57798	1		0.34066	0.57798	1	0.98466	0.94621	1
Eef1a1	484	-0.443127	0.6028	1		0.36857	0.6028	1	0.972	0.89918	1
Carhsp1	485	-0.441218	0.95302	1		0.93361	0.95302	1	0.91463	0.74978	1
Dis3	486	-0.440709	0.85289	1		0.73147	0.85289	1	0.37981	0.17154	0.576058
Boll	487	-0.440527	0.26234	1		0.11734	0.26234	1	0.61376	0.37531	0.956869
Dcps	488	-0.435764	0.26235	1		0.11829	0.26235	1	0.92081	0.78899	1
Tex13a	489	-0.431255	0.92889	1		0.89632	0.92889	1	0.73764	0.5615	1
Dnajc1	490	-0.430109	0.57458	1		0.33811	0.57458	1	0.87849	0.68383	1
2810006K23Rik	491	-0.429782	0.49995	1		0.28073	0.49995	1	0.97472	0.90698	1
Smg9	492	-0.428418	0.32533	1		0.15924	0.32533	1	0.98639	0.9528	1
Clk2	493	-0.427582	0.57798	1		0.34117	0.57798	1	0.44404	0.24768	0.73208
Dpysl2	494	-0.425618	0.13808	1		0.057449	0.13808	1	0.96257	0.87022	1
Rbm48	495	-0.418745	0.77835	1		0.60033	0.77835	1	0.94043	0.82707	1
Rpf1	496	-0.415818	0.037049	0.525103		0.012497	0.037049	0.525103	0.25884	0.10171	0.405541
Rbpms2	497	-0.415364	0.016675	0.30318		0.0051336	0.016675	0.30318	0.52706	0.31286	0.853263
Tia1	498	-0.414036	0.62154	1		0.39147	0.62154	1	0.32392	0.12653	0.471547
Rbm24	499	-0.412691	0.49179	1		0.27636	0.49179	1	0.97589	0.90933	1
Trim56	500	-0.411618	0.9321	1		0.89775	0.9321	1	0.90404	0.72359	1
Rbm34	501	-0.408673	0.17731	1		0.076215	0.17731	1	0.90592	0.73248	1
Casc3	502	-0.403018	0.29978	1		0.13717	0.29978	1	0.65278	0.41308	1
Ctnna1	503	-0.401982	0.91999	1		0.88026	0.91999	1	0.64002	0.40882	1
Ptbp3	504	-0.399455	0.21179	1		0.089612	0.21179	1	0.9487	0.84627	1
Sptan1	505	-0.396782	0.53911	1		0.30573	0.53911	1	0.38671	0.19328	0.639533
Eif2ak2	506	-0.3962	0.52502	1		0.29475	0.52502	1	0.98945	0.96186	1
Rorc	507	-0.395855	0.7851	1		0.60457	0.7851	1	0.92764	0.79749	1
Eif3a	508	-0.389582	0.34431	1		0.17547	0.34431	1	0.10944	0.021504	0.127749
Ppie	509	-0.388273	0.95177	1		0.92895	0.95177	1	0.35673	0.16197	0.561505
Akap8l	510	-0.387309	0.81744	1		0.65633	0.81744	1	0.98286	0.93501	1
Afdn	511	-0.386	0.64524	1		0.44103	0.64524	1	0.26034	0.10171	0.405541
Nolc1	512	-0.384491	0.79188	1		0.61442	0.79188	1	0.28869	0.10632	0.410668
Xrcc6	513	-0.382273	0.55747	1		0.32678	0.55747	1	0.60756	0.3683	0.943024
Mkrn1	514	-0.376891	0.78511	1		0.60964	0.78511	1	0.50508	0.30614	0.853263
Zc3h4	515	-0.373455	0.84301	1		0.68273	0.84301	1	0.39147	0.20057	0.654048
Ifih1	516	-0.372618	0.44201	1		0.23722	0.44201	1	0.59576	0.36066	0.928745
Zc3h14	517	-0.370891	0.71008	1		0.50429	0.71008	1	0.67461	0.43976	1
Nxf3	518	-0.369327	0.59066	1		0.35778	0.59066	1	0.97017	0.89368	1
Nol3	519	-0.364836	0.23979	1		0.11144	0.23979	1	0.97276	0.89918	1
Nfe2l2	520	-0.362582	0.092748	0.977807		0.033212	0.092748	0.977807	0.98558	0.94903	1
Secisbp2	521	-0.361564	0.68155	1		0.47766	0.68155	1	0.98905	0.96079	1
BC005561	522	-0.359018	0.057506	0.708972		0.017909	0.057506	0.708972	0.96611	0.87912	1
Ripk1	523	-0.3566	0.2062	1		0.084427	0.2062	1	0.70296	0.51171	1
Zcchc3	524	-0.352309	0.69789	1		0.49073	0.69789	1	0.64587	0.40883	1
Ddx24	525	-0.351127	0.86535	1		0.77971	0.86535	1	0.37718	0.17153	0.576058
Cirbp	526	-0.350473	0.73721	1		0.53937	0.73721	1	0.22944	0.097159	0.403917
Zbtb16	527	-0.349255	0.3622	1		0.18788	0.3622	1	0.63999	0.40882	1
Zap70	528	-0.348055	0.67305	1		0.46808	0.67305	1	0.2966	0.11123	0.426006
Ppig	529	-0.345327	0.10084	0.984164		0.0368	0.10084	0.984164	0.17321	0.056339	0.267601
AI837181	530	-0.339764	0.80973	1		0.64479	0.80973	1	0.70196	0.50675	1
Taf15	531	-0.339018	0.85289	1		0.72014	0.85289	1	0.65971	0.43034	1
Dhx40	532	-0.338927	0.91548	1		0.86835	0.91548	1	0.8921	0.70605	1
Mtpap	533	-0.329291	0.067621	0.806078		0.021456	0.067621	0.806078	0.70994	0.52606	1
Cybb	534	-0.327436	0.04574	0.575815		0.014962	0.04574	0.575815	0.94171	0.82708	1
Spcs2	535	-0.3272	0.7516	1		0.55642	0.7516	1	0.60687	0.3683	0.943024
Eif1a	536	-0.3268	0.48956	1		0.27255	0.48956	1	0.96572	0.87911	1
Cnn3	537	-0.321582	0.17369	1		0.074741	0.17369	1	0.91007	0.74131	1
Ywhag	538	-0.318164	0.85011	1		0.69871	0.85011	1	0.86667	0.67082	1
Auh	539	-0.317836	0.66559	1		0.4588	0.66559	1	0.40508	0.21473	0.676433
Ipo11	540	-0.316127	0.30681	1		0.14097	0.30681	1	0.72712	0.54088	1
Ctif	541	-0.312382	0.17231	1		0.073415	0.17231	1	0.88146	0.68833	1
Tcf25	542	-0.310764	0.20383	1		0.08405	0.20383	1	0.80895	0.60952	1
Csdc2	543	-0.310691	0.96524	1		0.95327	0.96524	1	0.92516	0.79749	1
Lrrc59	544	-0.307509	0.80973	1		0.64759	0.80973	1	0.46556	0.25432	0.739527
Rbmx2	545	-0.3048	0.6028	1		0.36864	0.6028	1	0.34776	0.15145	0.535597
Cactin	546	-0.303091	0.79711	1		0.62479	0.79711	1	0.87455	0.67528	1
2210016L21Rik	547	-0.301691	0.93352	1		0.90458	0.93352	1	0.68088	0.45458	1
Hmces	548	-0.288782	0.72714	1		0.52856	0.72714	1	0.89069	0.7017	1
Gm21708	549	-0.286527	0.80263	1		0.63367	0.80263	1	0.9839	0.94159	1
Prkcq	550	-0.280055	0.86836	1		0.78646	0.86836	1	0.97695	0.91603	1
Gm4340	551	-0.272018	0.38018	1		0.19654	0.38018	1	0.2187	0.092027	0.388846
Cmtr2	552	-0.269709	0.7672	1		0.58299	0.7672	1	0.96902	0.89368	1
Elavl2	553	-0.268709	0.61952	1		0.38739	0.61952	1	0.66572	0.43034	1
Hnrnpdl	554	-0.266691	0.33198	1		0.16704	0.33198	1	0.45449	0.25188	0.733659
Gm10256	555	-0.265727	0.57798	1		0.34032	0.57798	1	0.99684	0.98624	1
Xpo7	556	-0.263873	0.95753	1		0.93973	0.95753	1	0.88648	0.69735	1
Hnrnph2	557	-0.261836	0.64524	1		0.44184	0.64524	1	0.66155	0.43034	1
Safb2	558	-0.260836	0.60099	1		0.36653	0.60099	1	0.2624	0.10171	0.405541
Ddx27	559	-0.259564	0.90353	1		0.84324	0.90353	1	0.27802	0.10459	0.406636
Msi1	560	-0.256273	0.55747	1		0.32	0.55747	1	0.98726	0.9528	1
Scaf4	561	-0.255891	0.62346	1		0.40507	0.62346	1	0.97215	0.89918	1
Cstf2t	562	-0.251345	0.71982	1		0.5156	0.71982	1	0.73283	0.55166	1
Ncbp1	563	-0.248327	0.9274	1		0.89369	0.9274	1	0.37401	0.16881	0.571159
Dhx16	564	-0.245618	0.60281	1		0.37084	0.60281	1	0.33452	0.13094	0.479041
Zc3h18	565	-0.241891	0.92595	1		0.88957	0.92595	1	0.95096	0.84982	1
Eif3b	566	-0.236473	0.91548	1		0.86361	0.91548	1	0.077262	0.015987	0.105411
Lck	567	-0.233982	0.66559	1		0.45989	0.66559	1	0.74823	0.56567	1
Nsun2	568	-0.2318	0.91395	1		0.86062	0.91395	1	0.63543	0.40061	0.996
Alkbh1	569	-0.2318	0.43404	1		0.22923	0.43404	1	0.98341	0.93681	1
Idh2	570	-0.227309	0.32723	1		0.15999	0.32723	1	0.72964	0.54627	1
Khdrbs2	571	-0.225309	0.12649	1		0.048929	0.12649	1	0.72736	0.54088	1
Igf2bp1	572	-0.220836	0.30969	1		0.14164	0.30969	1	0.88319	0.69735	1
Npm1	573	-0.211818	0.98859	1		0.98178	0.98859	1	0.25844	0.10171	0.405541
Mex3b	574	-0.208236	0.60494	1		0.37288	0.60494	1	0.71491	0.53152	1
Akap1	575	-0.207709	0.22606	1		0.10274	0.22606	1	0.34668	0.15145	0.535597
Atp5c1	576	-0.205891	0.87294	1		0.79498	0.87294	1	0.78683	0.59601	1
Aff4	577	-0.204727	0.76938	1		0.59081	0.76938	1	0.72294	0.53659	1
Vim	578	-0.2046	0.28985	1		0.12993	0.28985	1	0.8517	0.66215	1
Stat5b	579	-0.200618	0.57798	1		0.3516	0.57798	1	0.35386	0.15645	0.546833
Fkbp1a	580	-0.200491	0.9554	1		0.93677	0.9554	1	0.96656	0.87912	1
Aff1	581	-0.197327	0.92596	1		0.89069	0.92596	1	0.13853	0.028743	0.157257
1110004F10Rik	582	-0.195055	0.34021	1		0.17087	0.34021	1	0.58036	0.34963	0.918761
Adarb1	583	-0.193255	0.50194	1		0.28423	0.50194	1	0.62903	0.38977	0.971716
Dhx32	584	-0.192091	0.71733	1		0.50809	0.71733	1	0.43023	0.234	0.713903
Patl2	585	-0.1898	0.96876	1		0.96159	0.96876	1	0.69081	0.49025	1
Rbm42	586	-0.188473	0.44202	1		0.23801	0.44202	1	0.11897	0.022544	0.130901
Cpsf3	587	-0.186	0.60495	1		0.37582	0.60495	1	0.43833	0.24061	0.724271
Msi2	588	-0.184709	0.15495	1		0.065382	0.15495	1	0.97942	0.92414	1
Pabpc1l2b-ps	589	-0.182891	0.5497	1		0.31431	0.5497	1	0.40952	0.21683	0.676433
Ifng	590	-0.182127	0.71007	1		0.49715	0.71007	1	0.675	0.43976	1
Zc3h13	591	-0.18032	0.52265	1		0.29236	0.52265	1	0.51983	0.31286	0.853263
Fkbp3	592	-0.174778	0.71981	1		0.51251	0.71981	1	0.50153	0.29833	0.849676
Raly	593	-0.174529	0.68604	1		0.48423	0.68604	1	0.94855	0.84627	1
Ubap2	594	-0.173358	0.85289	1		0.71706	0.85289	1	0.95275	0.84982	1
Lcp2	595	-0.167735	0.66559	1		0.45772	0.66559	1	0.89927	0.719	1
Cnp	596	-0.166473	0.33198	1		0.16711	0.33198	1	0.96789	0.88489	1
Raver1	597	-0.165827	0.57798	1		0.35137	0.57798	1	0.24077	0.097164	0.403917
Clk1	598	-0.162082	0.96877	1		0.96264	0.96877	1	0.41869	0.21906	0.679848
Caprin2	599	-0.15738	0.42744	1		0.21898	0.42744	1	0.86088	0.66648	1
Arl6ip4	600	-0.156396	0.79438	1		0.61876	0.79438	1	0.32751	0.12877	0.478899
Ckap4	601	-0.146349	0.55747	1		0.31856	0.55747	1	0.57048	0.33856	0.901495
Il2	602	-0.140847	0.68155	1		0.48137	0.68155	1	0.76605	0.57	1
Tma7	603	-0.140176	0.92313	1		0.88574	0.92313	1	0.84226	0.65785	1
Akap17b	604	-0.139776	0.89576	1		0.82808	0.89576	1	0.66071	0.43034	1
Grb7	605	-0.138956	0.85289	1		0.73056	0.85289	1	0.52554	0.31286	0.853263
Rrbp1	606	-0.13872	0.38018	1		0.1974	0.38018	1	0.55962	0.32754	0.878658
Dzip3	607	-0.135118	0.78511	1		0.6094	0.78511	1	0.48054	0.27465	0.790978
Unk	608	-0.126945	0.91548	1		0.86521	0.91548	1	0.95525	0.84983	1
Dzip1	609	-0.125516	0.50194	1		0.28243	0.50194	1	0.59968	0.36066	0.928745
Frg1	610	-0.122624	0.57798	1		0.35363	0.57798	1	0.96287	0.87022	1
Apobec4	611	-0.118847	0.86534	1		0.77762	0.86534	1	0.62143	0.38598	0.971703
Purg	612	-0.111735	0.94298	1		0.92134	0.94298	1	0.96023	0.85339	1
Tcof1	613	-0.10936	0.98859	1		0.98158	0.98859	1	0.5838	0.34964	0.918761
Gtpbp2	614	-0.108964	0.65719	1		0.4532	0.65719	1	0.17681	0.056345	0.267601
U2af1l4	615	-0.10718	0.95302	1		0.93322	0.95302	1	0.95949	0.85339	1
Brix1	616	-0.102833	0.2118	1		0.092507	0.2118	1	0.042003	0.0055858	0.044533
Ascc3	617	-0.101171	0.94139	1		0.91928	0.94139	1	0.18639	0.060404	0.280226
Rexo4	618	-0.100127	0.64524	1		0.44211	0.64524	1	0.91373	0.74978	1
Trim71	619	-0.0980345	0.79711	1		0.62345	0.79711	1	0.89428	0.70605	1
Aen	620	-0.0929455	0.39544	1		0.2075	0.39544	1	0.26913	0.10319	0.405541
Lsm3	621	-0.0920745	0.60099	1		0.36608	0.60099	1	0.73887	0.5615	1
Spats2l	622	-0.0918745	0.45932	1		0.24731	0.45932	1	0.99246	0.96604	1
Lin28a	623	-0.0918018	0.6269	1		0.41546	0.6269	1	0.72805	0.54627	1
Cpeb2	624	-0.0904673	0.96524	1		0.95378	0.96524	1	0.57821	0.34212	0.906947
Son	625	-0.0790836	0.92312	1		0.88447	0.92312	1	0.54061	0.32406	0.878482
Eif4a1	626	-0.0752455	0.4189	1		0.21808	0.4189	1	0.94582	0.83499	1
Srrm3	627	-0.0691836	0.57458	1		0.33606	0.57458	1	0.77453	0.57883	1
Pabpn1l	628	-0.0682491	0.23979	1		0.11213	0.23979	1	0.43352	0.234	0.713903
Myef2	629	-0.0668509	0.78511	1		0.61155	0.78511	1	0.3652	0.16408	0.561505
Tial1	630	-0.0659073	0.80534	1		0.63915	0.80534	1	0.8264	0.64467	1
Fam120a	631	-0.0598145	0.45933	1		0.24789	0.45933	1	0.15643	0.036757	0.18958
Lgals3	632	-0.0584164	0.26235	1		0.11808	0.26235	1	0.98303	0.93501	1
Pabpc1l	633	-0.0559655	0.9671	1		0.95853	0.9671	1	0.89747	0.71033	1
Alyref2	634	-0.0531636	0.54735	1		0.31364	0.54735	1	0.90377	0.72359	1
G3bp2	635	-0.0479291	0.6269	1		0.41549	0.6269	1	0.34754	0.15145	0.535597
Ddx54	636	-0.0464764	0.99535	1		0.99073	0.99535	1	0.51819	0.31286	0.853263
Hadhb	637	-0.0458345	0.78925	1		0.61306	0.78925	1	0.319	0.11863	0.445782
Pura	638	-0.0400255	0.80719	1		0.64024	0.80719	1	0.58703	0.35329	0.924325
Stat5a	639	-0.0391018	0.79438	1		0.61658	0.79438	1	0.95471	0.84983	1
Ddx46	640	-0.0386309	0.86688	1		0.78236	0.86688	1	0.88383	0.69735	1
Ipo13	641	-0.03348	0.50823	1		0.28686	0.50823	1	0.15127	0.035074	0.184063
Khdrbs1	642	-0.0323364	0.76261	1		0.57427	0.76261	1	0.71683	0.53658	1
Bzw2	643	-0.0322564	0.44202	1		0.23838	0.44202	1	0.44666	0.24769	0.73208
Prpf18	644	-0.02836	0.48349	1		0.26521	0.48349	1	0.7309	0.54627	1
Cryz	645	-0.0254855	0.55747	1		0.32661	0.55747	1	0.50313	0.30614	0.853263
Nr0b1	646	-0.0210291	0.74708	1		0.54634	0.74708	1	0.51432	0.31286	0.853263
Rbm43	647	-0.0185582	0.96524	1		0.95303	0.96524	1	0.45663	0.25189	0.733659
Zcchc9	648	-0.0147307	0.9718	1		0.96646	0.9718	1	0.37945	0.17154	0.576058
Pnldc1	649	-0.00779436	0.53911	1		0.30945	0.53911	1	0.86859	0.67528	1
Hnrnpr	650	-0.00774127	0.60281	1		0.37206	0.60281	1	0.69905	0.50675	1
Eif1	651	-0.00334964	0.98737	1		0.97973	0.98737	1	0.35997	0.16198	0.561505
Trmt2a	652	0.000503836	0.2954	0.845354		0.34351	0.57798	1	0.4926	0.2954	0.845354
Aff3	653	0.0007252	0.89368	1		0.28552	0.50194	1	0.96969	0.89368	1
Cnot6	654	0.00596327	0.092021	0.388846		0.93158	0.95301	1	0.21393	0.092021	0.388846
Trub1	655	0.00728109	0.5615	1		0.29744	0.53053	1	0.73909	0.5615	1
Cpsf7	656	0.00766927	0.93315	1		0.12571	0.28258	1	0.98121	0.93315	1
Rbm46	657	0.00843818	0.84983	1		0.05064	0.12976	1	0.95579	0.84983	1
Fam46a	658	0.009038	0.32754	0.878658		0.6835	0.84301	1	0.55556	0.32754	0.878658
Ebna1bp2	659	0.0100087	0.81433	1		0.57628	0.76475	1	0.93652	0.81433	1
Rbm44	660	0.0105958	0.234	0.713903		0.18947	0.3643	1	0.42637	0.234	0.713903
Tpi1	661	0.010896	0.11505	0.436008		0.13873	0.30418	1	0.30142	0.11505	0.436008
Csrp1	662	0.0109515	0.81855	1		0.67968	0.84145	1	0.93829	0.81855	1
Cstf1	663	0.0194964	0.38977	0.971716		0.31006	0.53911	1	0.62708	0.38977	0.971716
Zrsr1	664	0.0211691	0.67528	1		0.61077	0.78511	1	0.87048	0.67528	1
Eif4e1b	665	0.0228818	0.027445	0.153897		0.26595	0.4854	1	0.13235	0.027445	0.153897
Psap	666	0.0246545	0.13551	0.491766		0.55749	0.7516	1	0.33807	0.13551	0.491766
Lsm14b	667	0.02714	0.6048	1		0.3507	0.57798	1	0.79851	0.6048	1
Parp12	668	0.0276636	0.41308	1		0.18316	0.35554	1	0.65038	0.41308	1
Bach1	669	0.0416873	0.18648	0.618155		0.92602	0.95028	1	0.385	0.18648	0.618155
Usp10	670	0.0508473	0.059216	0.276881		0.65294	0.81138	1	0.18378	0.059216	0.276881
Cnot8	671	0.0515655	0.88489	1		0.97614	0.98223	1	0.96836	0.88489	1
Cir1	672	0.0535964	0.84982	1		0.64523	0.80973	1	0.95174	0.84982	1
Ncbp2	673	0.0623036	0.31286	0.853263		0.53657	0.73463	1	0.52998	0.31286	0.853263
Rbbp6	674	0.0634145	0.01942	0.1173		0.28436	0.50194	1	0.10191	0.01942	0.1173
Gspt2	675	0.0636909	0.021928	0.128182		0.66285	0.8238	1	0.11299	0.021928	0.128182
Twistnb	676	0.0667709	0.15645	0.546833		0.28494	0.50194	1	0.35499	0.15645	0.546833
Gm8764	677	0.0675018	0.056339	0.267601		0.32507	0.55747	1	0.17462	0.056339	0.267601
Apobec2	678	0.0734673	0.45942	1		0.6126	0.78714	1	0.6822	0.45942	1
Atxn1l	679	0.0746455	0.10318	0.405541		0.5941	0.76938	1	0.26801	0.10318	0.405541
Dusp11	680	0.0771564	0.68833	1		0.84698	0.90516	1	0.8819	0.68833	1
Eef2k	681	0.0783345	0.092027	0.388846		0.53119	0.72961	1	0.2201	0.092027	0.388846
Nop53	682	0.0784545	0.5615	1		0.98204	0.98859	1	0.73957	0.5615	1
Larp6	683	0.07884	0.10171	0.405541		0.47072	0.6793	1	0.26336	0.10171	0.405541
Urb1	684	0.0827509	0.016471	0.107132		0.52554	0.72713	1	0.083016	0.016471	0.107132
Mex3c	685	0.0859909	0.21473	0.676433		0.45234	0.65719	1	0.4062	0.21473	0.676433
Pcbp4	686	0.0889036	0.40883	1		0.067049	0.16198	1	0.64306	0.40883	1
Rbm47	687	0.0928036	0.20057	0.654048		0.9801	0.98737	1	0.38875	0.20057	0.654048
Nono	688	0.0952436	0.84982	1		0.74348	0.85588	1	0.95308	0.84982	1
Wbp11	689	0.0958945	0.51638	1		0.9352	0.95414	1	0.70386	0.51638	1
Eif3h	690	0.0999055	0.29227	0.83905		0.8926	0.9274	1	0.49102	0.29227	0.83905
Dnajc8	691	0.100042	0.53152	1		0.10069	0.22606	1	0.715	0.53152	1
2410004B18Rik	692	0.102642	0.64924	1		0.74085	0.85444	1	0.83654	0.64924	1
Pcnp	693	0.103116	0.59601	1		0.1081	0.23489	1	0.78627	0.59601	1
Las1l	694	0.10418	0.2629	0.75837		0.96449	0.96961	1	0.47797	0.2629	0.75837
Pdia4	695	0.104369	0.18648	0.618155		0.33875	0.57458	1	0.38462	0.18648	0.618155
Dync1li2	696	0.109158	0.50675	1		0.58177	0.76719	1	0.70121	0.50675	1
Rag1	697	0.111038	0.38977	0.971716		0.6849	0.847	1	0.63042	0.38977	0.971716
Dlg1	698	0.113684	0.24769	0.73208		0.8615	0.91396	1	0.44975	0.24769	0.73208
Hnrnpa3	699	0.113727	0.11654	0.439785		0.6374	0.80534	1	0.31295	0.11654	0.439785
Ago1	700	0.121931	0.036757	0.18958		0.41458	0.6269	1	0.15597	0.036757	0.18958
Habp4	701	0.123591	0.57883	1		0.041798	0.11013	1	0.77531	0.57883	1
Mecp2	702	0.129091	0.21251	0.676433		0.31947	0.55747	1	0.3993	0.21251	0.676433
Ylpm1	703	0.133684	0.033633	0.180177		0.34506	0.57798	1	0.14702	0.033633	0.180177
Magoh	704	0.135355	0.10029	0.405541		0.24531	0.45616	1	0.25306	0.10029	0.405541
Lrrc47	705	0.146289	0.7413	1		0.93713	0.9554	1	0.90653	0.7413	1
Spats2	706	0.148402	0.21251	0.676433		0.81504	0.88236	1	0.40463	0.21251	0.676433
Trim25	707	0.150024	0.1688	0.571159		0.27527	0.49178	1	0.37265	0.1688	0.571159
Por	708	0.153144	0.1095	0.422043		0.87236	0.91705	1	0.29302	0.1095	0.422043
R3hdm1	709	0.153724	0.52118	1		0.13925	0.30418	1	0.70634	0.52118	1
Gm4064	710	0.154556	0.6048	1		0.71057	0.85289	1	0.79816	0.6048	1
Tnpo1	711	0.155235	0.10318	0.405541		0.93633	0.9554	1	0.26577	0.10318	0.405541
Magohb	712	0.159927	0.16197	0.561505		0.95017	0.96422	1	0.3577	0.16197	0.561505
Rtn4	713	0.160438	0.8059	1		0.96496	0.96961	1	0.93354	0.8059	1
Chtop	714	0.164915	0.018287	0.113324		0.17319	0.34227	1	0.09735	0.018287	0.113324
Upf2	715	0.167147	0.24768	0.73208		0.5026	0.71008	1	0.44628	0.24768	0.73208
Zc3h12b	716	0.170327	0.32077	0.873497		0.29335	0.52266	1	0.5379	0.32077	0.873497
Dek	717	0.173135	0.43034	1		0.83332	0.8973	1	0.66322	0.43034	1
Zc3h8	718	0.176618	0.24768	0.73208		0.98693	0.99368	1	0.44351	0.24768	0.73208
Rbm4b	719	0.179351	0.016724	0.107132		0.32988	0.56154	1	0.088847	0.016724	0.107132
Dazl	720	0.180325	0.44549	1		0.72988	0.85289	1	0.67746	0.44549	1
Sod2	721	0.182145	0.30614	0.853263		0.54462	0.74452	1	0.51289	0.30614	0.853263
Eri1	722	0.183745	0.3533	0.924325		0.79229	0.87	1	0.59104	0.3533	0.924325
Fastk	723	0.186727	0.37531	0.956869		0.35228	0.57798	1	0.6126	0.37531	0.956869
Zc3h12d	724	0.193145	0.13551	0.491766		0.27198	0.48956	1	0.33811	0.13551	0.491766
Rbmx	725	0.202127	0.80163	1		0.875	0.91705	1	0.92874	0.80163	1
Upf3a	726	0.206709	0.92774	1		0.85276	0.91111	1	0.97968	0.92774	1
Celf4	727	0.206927	0.21683	0.676433		0.52462	0.72713	1	0.40916	0.21683	0.676433
Fus	728	0.212509	0.11654	0.439785		0.3796	0.60873	1	0.30986	0.11654	0.439785
Nmd3	729	0.212709	0.74978	1		0.37903	0.60873	1	0.91365	0.74978	1
P4hb	730	0.215673	0.068749	0.305549		0.1953	0.37098	1	0.19917	0.068749	0.305549
Ruvbl2	731	0.221655	0.10171	0.405541		0.43632	0.64192	1	0.26565	0.10171	0.405541
Trnau1ap	732	0.224	0.53152	1		0.90547	0.93352	1	0.71407	0.53152	1
Mov10l1	733	0.224564	0.38598	0.971703		0.95646	0.96622	1	0.62076	0.38598	0.971703
Cflar	734	0.227836	0.31286	0.853263		0.60709	0.7851	1	0.53456	0.31286	0.853263
Mettl16	735	0.230109	0.063749	0.287588		0.46217	0.66862	1	0.19372	0.063749	0.287588
Sympk	736	0.230345	0.059216	0.276881		0.54562	0.74708	1	0.18351	0.059216	0.276881
Klf6	737	0.2304	0.20822	0.672867		0.2	0.38429	1	0.3976	0.20822	0.672867
Thoc2	738	0.233873	0.25189	0.733659		0.3892	0.61952	1	0.45962	0.25189	0.733659
Nusap1	739	0.235509	0.52606	1		0.14484	0.31133	1	0.70936	0.52606	1
Srsf4	740	0.238873	0.84983	1		0.50731	0.71479	1	0.95369	0.84983	1
Hdlbp	741	0.239818	0.5615	1		0.93412	0.95302	1	0.73852	0.5615	1
Noct	742	0.256545	0.40883	1		0.12358	0.27825	1	0.64566	0.40883	1
Zc3hav1	743	0.257382	0.80163	1		0.51095	0.71981	1	0.92895	0.80163	1
Aldh2	744	0.260364	0.41307	1		0.24761	0.45932	1	0.64931	0.41307	1
Eif2ak3	745	0.261418	0.21683	0.676433		0.85394	0.91111	1	0.40845	0.21683	0.676433
Dhx9	746	0.2634	0.5615	1		0.92487	0.95028	1	0.73817	0.5615	1
Tra2b	747	0.264418	0.38598	0.971703		0.55176	0.74708	1	0.61963	0.38598	0.971703
Edem1	748	0.2698	0.52118	1		0.25263	0.46993	1	0.70691	0.52118	1
Dhx34	749	0.276527	0.90698	1		0.3679	0.601	1	0.97453	0.90698	1
Tex13b	750	0.281255	0.54088	1		0.94855	0.96204	1	0.72549	0.54088	1
Larp7	751	0.284127	0.048848	0.24563		0.91567	0.93996	1	0.16285	0.048848	0.24563
Gtpbp1	752	0.286164	0.24768	0.73208		0.82974	0.89576	1	0.44463	0.24768	0.73208
Rbm11	753	0.288709	0.15145	0.535597		0.31923	0.55747	1	0.34553	0.15145	0.535597
Parn	754	0.290545	0.83109	1		0.64068	0.80719	1	0.94506	0.83109	1
Got2	755	0.294564	0.6048	1		0.61465	0.79188	1	0.79939	0.6048	1
Rela	756	0.296109	0.016724	0.107132		0.04265	0.11631	1	0.088074	0.016724	0.107132
Ncbp3	757	0.297291	0.25189	0.733659		0.3293	0.56154	1	0.45826	0.25189	0.733659
Bcl2l11	758	0.303873	0.69735	1		0.63851	0.80534	1	0.88373	0.69735	1
Nxf2	759	0.305273	0.51955	1		0.53492	0.71529	1	0.7328	0.51955	1
Acin1	760	0.306545	0.063749	0.287588		0.89583	0.9274	1	0.19293	0.063749	0.287588
Pa2g4	761	0.310545	0.057291	0.271378		0.97953	0.98737	1	0.18297	0.057291	0.271378
Bms1	762	0.320436	0.078364	0.33826		0.2208	0.42956	1	0.20926	0.078364	0.33826
Fam103a1	763	0.320545	0.078364	0.33826		0.48505	0.68605	1	0.20932	0.078364	0.33826
Calr	764	0.326582	0.58286	1		0.47743	0.68155	1	0.77838	0.58286	1
Tsc1	765	0.329218	0.234	0.713903		0.89851	0.9321	1	0.43328	0.234	0.713903
Rbm12b1	766	0.3336	0.52607	1		0.26142	0.47823	1	0.71154	0.52607	1
Mtrf1	767	0.338109	0.1046	0.406636		0.3652	0.60099	1	0.28023	0.1046	0.406636
Ern2	768	0.338327	0.51639	1		0.25561	0.47822	1	0.70482	0.51639	1
Grsf1	769	0.338418	0.21683	0.676433		0.36569	0.60099	1	0.40735	0.21683	0.676433
Ints6l	770	0.342327	0.81015	1		0.86989	0.91548	1	0.93527	0.81015	1
Nxt2	771	0.348473	0.33528	0.89676		0.98392	0.99091	1	0.56245	0.33528	0.89676
Ikzf3	772	0.3538	0.10319	0.405541		0.8727	0.91705	1	0.26969	0.10319	0.405541
Celf6	773	0.355091	0.22311	0.690033		0.39972	0.62155	1	0.42186	0.22311	0.690033
Snrpa1	774	0.359	0.040355	0.206948		0.49835	0.71007	1	0.15775	0.040355	0.206948
Sqstm1	775	0.359655	0.43034	1		0.60869	0.78511	1	0.66659	0.43034	1
Pabpc4	776	0.362964	0.036757	0.18958		0.80558	0.8778	1	0.15532	0.036757	0.18958
Mex3d	777	0.363455	0.0169	0.107875		0.46613	0.66863	1	0.089038	0.0169	0.107875
Ybx3	778	0.365945	0.72359	1		0.861	0.91396	1	0.90413	0.72359	1
Stau1	779	0.367636	0.20414	0.660882		0.48013	0.68155	1	0.39577	0.20414	0.660882
Flnb	780	0.371964	0.11123	0.426006		0.38784	0.61952	1	0.29822	0.11123	0.426006
Nsa2	781	0.382382	0.43034	1		0.9143	0.93996	1	0.66845	0.43034	1
Mrto4	782	0.382982	0.0088201	0.066988		0.38187	0.60874	1	0.050968	0.0088201	0.066988
Card11	783	0.387273	0.048853	0.24563		0.93943	0.95753	1	0.16454	0.048853	0.24563
Slu7	784	0.387618	0.38977	0.971716		0.80147	0.87615	1	0.62921	0.38977	0.971716
Utp14a	785	0.393564	0.01942	0.1173		0.92566	0.95028	1	0.10115	0.01942	0.1173
Atxn2l	786	0.394327	0.66215	1		0.87535	0.91705	1	0.8577	0.66215	1
Cwf19l2	787	0.397727	0.234	0.713903		0.98784	0.9939	1	0.4313	0.234	0.713903
Rbfox2	788	0.399418	0.21683	0.676433		0.30519	0.53911	1	0.41301	0.21683	0.676433
Pus7	789	0.4124	0.81015	1		0.40952	0.62689	1	0.93444	0.81015	1
Flnc	790	0.412764	0.52607	1		0.88222	0.91999	1	0.71164	0.52607	1
Larp4b	791	0.414182	0.35682	0.928745		0.12098	0.26496	1	0.5928	0.35682	0.928745
Ddx19b	792	0.416255	0.01777	0.110675		0.7042	0.85289	1	0.095742	0.01777	0.110675
Polr2f	793	0.419964	0.023589	0.135224		0.4313	0.63998	1	0.12246	0.023589	0.135224
Bclaf1	794	0.420673	0.38219	0.968951		0.43355	0.63998	1	0.6151	0.38219	0.968951
Ppfibp1	795	0.426345	0.1355	0.491766		0.96836	0.97616	1	0.33785	0.1355	0.491766
Upf3b	796	0.429455	0.11505	0.436008		0.42547	0.63786	1	0.30198	0.11505	0.436008
Dnd1	797	0.430127	0.43034	1		0.41881	0.62905	1	0.65697	0.43034	1
Nanos3	798	0.440036	0.13094	0.479041		0.91623	0.93996	1	0.33425	0.13094	0.479041
Lyar	799	0.440655	0.79748	1		0.24416	0.45616	1	0.92349	0.79748	1
Xpo4	800	0.443182	0.092027	0.388846		0.80354	0.8778	1	0.21842	0.092027	0.388846
Strbp	801	0.452473	0.84982	1		0.68848	0.847	1	0.95047	0.84982	1
Hsp90aa1	802	0.452782	0.60481	1		0.64205	0.80973	1	0.8049	0.60481	1
Dync1h1	803	0.452873	0.3683	0.943024		0.48385	0.68604	1	0.60733	0.3683	0.943024
Iqgap1	804	0.454255	0.027439	0.153897		0.60411	0.78301	1	0.12962	0.027439	0.153897
Ptbp2	805	0.467964	0.048853	0.24563		0.95503	0.96525	1	0.16437	0.048853	0.24563
Fyttd1	806	0.472636	0.65785	1		0.063683	0.15368	1	0.84725	0.65785	1
Gm8994	807	0.476091	0.66215	1		0.03078	0.084876	0.920345	0.85668	0.66215	1
Abcf1	808	0.478873	0.20057	0.654048		0.24533	0.45616	1	0.39124	0.20057	0.654048
Sugp1	809	0.479436	0.30614	0.853263		0.74608	0.8575	1	0.51302	0.30614	0.853263
Gm6793	810	0.479636	0.20057	0.654048		0.65278	0.81138	1	0.39011	0.20057	0.654048
Eif2ak1	811	0.481782	0.79749	1		0.62248	0.79711	1	0.92833	0.79749	1
Ddx52	812	0.488491	0.064667	0.288836		0.99528	0.99816	1	0.1961	0.064667	0.288836
Ik	813	0.4982	0.70605	1		0.62591	0.79711	1	0.8922	0.70605	1
Sf3b5	814	0.498891	0.57033	1		0.56767	0.74852	1	0.77843	0.57033	1
Tma16	815	0.500418	0.13094	0.479041		0.58892	0.76938	1	0.3338	0.13094	0.479041
Dhx38	816	0.511945	0.20057	0.654048		0.48198	0.68155	1	0.39237	0.20057	0.654048
Srsf12	817	0.514564	0.87912	1		0.8173	0.88236	1	0.96625	0.87912	1
Srpk2	818	0.514873	0.2629	0.75837		0.98056	0.98737	1	0.47683	0.2629	0.75837
Dhx57	819	0.515273	0.16408	0.561505		0.93853	0.95753	1	0.36268	0.16408	0.561505
Rbms2	820	0.519382	0.33529	0.89676		0.010562	0.03223	0.483457	0.56385	0.33529	0.89676
Peg10	821	0.523418	0.21251	0.676433		0.67093	0.8306	1	0.40032	0.21251	0.676433
Smu1	822	0.532764	0.17432	0.582147		0.48382	0.68604	1	0.38016	0.17432	0.582147
Srsf5	823	0.539509	0.55166	1		0.15171	0.31943	1	0.73373	0.55166	1
Hbs1l	824	0.545527	0.002731	0.024216		0.67661	0.83839	1	0.024201	0.002731	0.024216
Matr3	825	0.546909	0.21683	0.676433		0.51535	0.71982	1	0.41091	0.21683	0.676433
Otud4	826	0.556345	0.23672	0.717347		0.98563	0.99279	1	0.43472	0.23672	0.717347
Pnn	827	0.563582	0.21251	0.676433		0.87001	0.91548	1	0.40281	0.21251	0.676433
Ahnak	828	0.566036	0.14722	0.528932		0.38939	0.62154	1	0.34077	0.14722	0.528932
Gm10767	829	0.572545	0.43034	1		0.89059	0.92596	1	0.66033	0.43034	1
Utp20	830	0.576018	0.002401	0.021938		0.92984	0.95301	1	0.021256	0.002401	0.021938
Clasrp	831	0.581855	0.00034928	0.004459		0.95007	0.96422	1	0.0043766	0.00034928	0.004459
Etf1	832	0.586127	0.30614	0.853263		0.84615	0.90516	1	0.51251	0.30614	0.853263
Psip1	833	0.586673	0.025294	0.143175		0.66322	0.8238	1	0.12827	0.025294	0.143175
Cwc25	834	0.588327	0.056345	0.267601		0.70271	0.85289	1	0.17834	0.056345	0.267601
Ppil3	835	0.595345	0.25188	0.733659		0.55606	0.7516	1	0.4525	0.25188	0.733659
Ncf1	836	0.596327	0.84253	1		0.28572	0.50194	1	0.94715	0.84253	1
Srfbp1	837	0.606236	0.034167	0.181445		0.96763	0.97422	1	0.14774	0.034167	0.181445
Kpnb1	838	0.616364	0.013831	0.09725		0.97004	0.97809	1	0.062987	0.013831	0.09725
H2afx	839	0.616873	0.67528	1		0.57725	0.76476	1	0.87095	0.67528	1
Cwc15	840	0.620727	0.10029	0.405541		0.87794	0.91705	1	0.24625	0.10029	0.405541
Pdcd11	841	0.626309	0.32406	0.878482		0.98994	0.99535	1	0.54035	0.32406	0.878482
Cwf19l1	842	0.627818	0.17757	0.590811		0.44235	0.64524	1	0.38263	0.17757	0.590811
Ptpn22	843	0.630036	0.056345	0.267601		0.15459	0.32355	1	0.17986	0.056345	0.267601
Aicda	844	0.634764	1.38e-05	0.000243		0.76924	0.86373	1	0.0009718	1.38e-05	0.000243
Hnrnpul1	845	0.638182	0.020393	0.121986		0.35431	0.57798	1	0.10606	0.020393	0.121986
Atxn2	846	0.644873	0.89368	1		0.20308	0.38856	1	0.96966	0.89368	1
Eif4a3	847	0.647764	0.66648	1		0.91519	0.93996	1	0.8615	0.66648	1
Prdx3	848	0.649091	0.21683	0.676433		0.42772	0.63998	1	0.41229	0.21683	0.676433
Ncl	849	0.658909	0.24062	0.724271		0.29567	0.53052	1	0.44171	0.24062	0.724271
Prpf38a	850	0.665382	0.49551	1		0.15441	0.32355	1	0.69261	0.49551	1
Ranbp6	851	0.665509	0.1046	0.406636		0.83785	0.9003	1	0.28226	0.1046	0.406636
Erp29	852	0.669582	0.097164	0.403917		0.48464	0.68605	1	0.24134	0.097164	0.403917
Nol10	853	0.672382	0.002126	0.020739		0.71611	0.85289	1	0.016167	0.002126	0.020739
Eftud2	854	0.683455	0.50675	1		0.4	0.62155	1	0.69711	0.50675	1
Ywhah	855	0.684236	0.01431	0.098687		0.39129	0.62154	1	0.066427	0.01431	0.098687
Eef2	856	0.693382	0.92935	1		0.92791	0.95029	1	0.98034	0.92935	1
Gtf2f1	857	0.693909	0.14722	0.528932		0.95681	0.96622	1	0.33987	0.14722	0.528932
Zfp385a	858	0.694818	0.32406	0.878482		0.98789	0.9939	1	0.54712	0.32406	0.878482
Papd7	859	0.697709	0.063749	0.287588		0.92509	0.95028	1	0.19351	0.063749	0.287588
Mkrn2	860	0.698782	0.70605	1		0.89823	0.9321	1	0.89418	0.70605	1
Gata3	861	0.7002	0.55166	1		0.55852	0.7516	1	0.73286	0.55166	1
Polr1e	862	0.7016	0.056345	0.267601		0.96649	0.9718	1	0.18146	0.056345	0.267601
Lsm7	863	0.703218	0.0042107	0.035089		0.57146	0.75845	1	0.036362	0.0042107	0.035089
Dhx29	864	0.707036	0.0016199	0.016758		0.99515	0.99815	1	0.013244	0.0016199	0.016758
Larp4	865	0.707873	0.38977	0.971716		0.77141	0.86373	1	0.62969	0.38977	0.971716
Sugp2	866	0.710091	0.38977	0.971716		0.71659	0.85289	1	0.63036	0.38977	0.971716
Knop1	867	0.713873	0.049832	0.249855		0.14507	0.31133	1	0.16491	0.049832	0.249855
Endov	868	0.714564	0.16682	0.567622		0.77298	0.86373	1	0.37084	0.16682	0.567622
Khdrbs3	869	0.7146	0.10029	0.405541		0.64931	0.80973	1	0.24752	0.10029	0.405541
Celf5	870	0.715073	0.31286	0.853263		0.83079	0.89577	1	0.51945	0.31286	0.853263
Gtf2i	871	0.716436	0.056345	0.267601		0.61752	0.79438	1	0.18269	0.056345	0.267601
Gnl2	872	0.725618	0.55166	1		0.97609	0.98223	1	0.73393	0.55166	1
Hnrnpa0	873	0.731327	0.016719	0.107132		0.95052	0.96422	1	0.08556	0.016719	0.107132
Pnrc2	874	0.734436	0.028743	0.157257		0.55104	0.74708	1	0.13717	0.028743	0.157257
Rbm27	875	0.7348	0.050613	0.252393		0.97491	0.98	1	0.16543	0.050613	0.252393
Dut	876	0.738873	0.22311	0.690033		0.84463	0.90354	1	0.4198	0.22311	0.690033
Gm10352	877	0.740709	0.21683	0.676433		0.89525	0.9274	1	0.41142	0.21683	0.676433
Hnrnph1	878	0.746545	0.022539	0.130901		0.33246	0.5676	1	0.11747	0.022539	0.130901
Tnf	879	0.747109	0.25188	0.733659		0.90287	0.93352	1	0.45429	0.25188	0.733659
Srsf2	880	0.749909	0.077076	0.334331		0.96144	0.96876	1	0.20639	0.077076	0.334331
Exosc9	881	0.759327	0.52607	1		0.87142	0.91705	1	0.71201	0.52607	1
L1td1	882	0.762327	0.0075495	0.058115		0.070587	0.16499	1	0.048258	0.0075495	0.058115
Dxo	883	0.765382	0.60038	1		0.25705	0.47822	1	0.79048	0.60038	1
Cisd1	884	0.766527	0.073903	0.322876		0.94746	0.96095	1	0.20528	0.073903	0.322876
Pum3	885	0.766564	0.09585	0.40313		0.93508	0.95414	1	0.22546	0.09585	0.40313
Nol7	886	0.775145	0.062153	0.286128		0.98668	0.99329	1	0.18751	0.062153	0.286128
Pno1	887	0.780527	0.056345	0.267601		0.93608	0.9554	1	0.1797	0.056345	0.267601
Crnkl1	888	0.803236	0.31286	0.853263		0.99389	0.99703	1	0.52794	0.31286	0.853263
Sfpq	889	0.806127	0.024832	0.141449		0.98535	0.99279	1	0.12665	0.024832	0.141449
Utp14b	890	0.8104	0.24062	0.724271		0.54035	0.73721	1	0.44238	0.24062	0.724271
Eef1d	891	0.812273	0.2954	0.845354		0.90827	0.9369	1	0.49445	0.2954	0.845354
Bcas2	892	0.821055	0.095855	0.40313		0.91607	0.93996	1	0.22744	0.095855	0.40313
Chmp4b	893	0.838182	0.31286	0.853263		0.64818	0.80973	1	0.51637	0.31286	0.853263
Sap18b	894	0.842891	0.11863	0.445782		0.61397	0.78925	1	0.31842	0.11863	0.445782
Rbm4	895	0.843927	0.056345	0.267601		0.92171	0.94298	1	0.17836	0.056345	0.267601
Supt16	896	0.843964	0.52119	1		0.53935	0.73721	1	0.70881	0.52119	1
Scaf11	897	0.846909	0.70605	1		0.3063	0.53911	1	0.89349	0.70605	1
Ilf2	898	0.848073	0.016477	0.107132		0.93444	0.95302	1	0.083943	0.016477	0.107132
Zfp385b	899	0.8606	0.027962	0.155345		0.66043	0.8238	1	0.13356	0.027962	0.155345
Rpa1	900	0.861091	0.94903	1		0.90422	0.93352	1	0.98553	0.94903	1
Eif2ak4	901	0.864673	0.84982	1		0.96849	0.97616	1	0.95303	0.84982	1
Gm4303	902	0.879618	0.24769	0.73208		0.99167	0.99598	1	0.44816	0.24769	0.73208
Cstf3	903	0.880855	0.056339	0.267601		0.85381	0.91111	1	0.17587	0.056339	0.267601
Apex1	904	0.883273	0.24768	0.73208		0.33257	0.5676	1	0.44553	0.24768	0.73208
Rpp30	905	0.885109	0.035069	0.184063		0.87374	0.91705	1	0.15054	0.035069	0.184063
Mex3a	906	0.889273	0.32754	0.878658		0.18393	0.35554	1	0.55212	0.32754	0.878658
Rrp1	907	0.889491	0.25189	0.733659		0.9015	0.93352	1	0.45635	0.25189	0.733659
Fbll1	908	0.898182	0.018573	0.113324		0.74694	0.8575	1	0.10054	0.018573	0.113324
Ctnnbl1	909	0.901891	0.21906	0.679848		0.97871	0.98533	1	0.4146	0.21906	0.679848
Esf1	910	0.904891	0.050619	0.252393		0.96276	0.96877	1	0.1657	0.050619	0.252393
Dzip1l	911	0.905218	0.16408	0.561505		0.91543	0.93996	1	0.36291	0.16408	0.561505
Clk3	912	0.915291	0.010113	0.075846		0.911	0.93995	1	0.053107	0.010113	0.075846
Sf3b4	913	0.915491	0.65358	1		0.69261	0.847	1	0.83756	0.65358	1
Nifk	914	0.917818	0.69735	1		0.9182	0.94138	1	0.88689	0.69735	1
Srrm1	915	0.919309	0.01091	0.07887		0.97968	0.98737	1	0.05653	0.01091	0.07887
Cwc22	916	0.919818	0.023584	0.135224		0.97486	0.98	1	0.12094	0.023584	0.135224
Drg2	917	0.929527	0.015982	0.105411		0.36913	0.6028	1	0.073039	0.015982	0.105411
Eif3c	918	0.933745	0.013105	0.093238		0.13751	0.30198	1	0.06082	0.013105	0.093238
Eif5b	919	0.952909	0.059216	0.276881		0.90122	0.93352	1	0.18355	0.059216	0.276881
Fam98a	920	0.953091	0.16682	0.567622		0.972	0.97879	1	0.37038	0.16682	0.567622
Snd1	921	0.973345	0.060399	0.280226		0.91718	0.93996	1	0.18575	0.060399	0.280226
Srrt	922	0.9758	0.062153	0.286128		0.39067	0.62154	1	0.18783	0.062153	0.286128
Ddx41	923	0.976836	0.32754	0.878658		0.99917	0.9998	1	0.55334	0.32754	0.878658
Caprin1	924	0.978855	0.059222	0.276881		0.8987	0.9321	1	0.18495	0.059222	0.276881
Rbm10	925	0.978909	0.056345	0.267601		0.94834	0.96204	1	0.18128	0.056345	0.267601
Grwd1	926	0.990545	0.064662	0.288836		0.99343	0.99664	1	0.19514	0.064662	0.288836
Urb2	927	0.991545	0.064667	0.288836		0.95707	0.96622	1	0.19645	0.064667	0.288836
Xpo1	928	0.995255	0.24768	0.73208		0.85987	0.91395	1	0.44508	0.24768	0.73208
Papd5	929	0.996182	0.010113	0.075846		0.98198	0.98859	1	0.053151	0.010113	0.075846
Rbm25	930	0.997745	0.0055858	0.044533		0.93895	0.95753	1	0.042184	0.0055858	0.044533
Llph	931	1.00185	0.097159	0.403917		0.63499	0.80264	1	0.2314	0.097159	0.403917
Ngdn	932	1.00804	0.01201	0.085789		0.93045	0.95301	1	0.059483	0.01201	0.085789
Eif3i	933	1.0142	0.01777	0.110675		0.28791	0.5106	1	0.095052	0.01777	0.110675
Hnrnpa2b1	934	1.01858	0.29833	0.849676		0.98377	0.9909	1	0.50073	0.29833	0.849676
Eif4e	935	1.01916	0.70605	1		0.567	0.75844	1	0.8919	0.70605	1
Isg20l2	936	1.01967	0.10171	0.405541		0.99841	0.99943	1	0.25676	0.10171	0.405541
Hnrnpa1l2-ps2	937	1.02471	0.0033251	0.028366		0.86411	0.91548	1	0.029118	0.0033251	0.028366
Exosc3	938	1.02602	0.74131	1		0.39548	0.62155	1	0.91158	0.74131	1
Wdr83	939	1.02713	0.059216	0.276881		0.90168	0.93352	1	0.18336	0.059216	0.276881
Polr2a	940	1.03395	0.01091	0.07887		0.50743	0.71479	1	0.056672	0.01091	0.07887
Utp15	941	1.03476	0.010558	0.077889		0.99308	0.99652	1	0.054604	0.010558	0.077889
Xrn1	942	1.04596	0.54088	1		0.95475	0.96525	1	0.72713	0.54088	1
Srsf7	943	1.04736	0.0023955	0.021938		0.83109	0.89577	1	0.020883	0.0023955	0.021938
Ftsj3	944	1.05769	0.010729	0.078226		0.060885	0.14878	1	0.055652	0.010729	0.078226
Exosc5	945	1.06271	0.036752	0.18958		0.85936	0.91395	1	0.15459	0.036752	0.18958
Prkd2	946	1.06285	0.31286	0.853263		0.93652	0.9554	1	0.52592	0.31286	0.853263
Nop56	947	1.06849	0.0088146	0.066988		0.75121	0.85751	1	0.049685	0.0088146	0.066988
Dqx1	948	1.06936	0.66215	1		0.2267	0.42956	1	0.85732	0.66215	1
Prpf40a	949	1.07129	0.21683	0.676433		0.33708	0.57458	1	0.4121	0.21683	0.676433
Kin	950	1.07484	0.021933	0.128182		0.97203	0.97879	1	0.11593	0.021933	0.128182
1810009A15Rik	951	1.08067	0.11506	0.436008		0.96147	0.96876	1	0.30364	0.11506	0.436008
Rbm28	952	1.08313	0.073903	0.322876		0.6579	0.82039	1	0.20507	0.073903	0.322876
Prkdc	953	1.08624	0.10171	0.405541		0.15386	0.32355	1	0.2559	0.10171	0.405541
Supt6	954	1.09893	0.20057	0.654048		0.82378	0.89138	1	0.3892	0.20057	0.654048
Zc3h11a	955	1.10096	0.0063174	0.04944		0.68008	0.843	1	0.045606	0.0063174	0.04944
Gm4302	956	1.10851	0.014766	0.100679		0.98793	0.9939	1	0.068487	0.014766	0.100679
Rbm6	957	1.11338	0.035674	0.186665		0.10341	0.22606	1	0.15302	0.035674	0.186665
Arid5a	958	1.11518	0.15385	0.542992		0.8517	0.90979	1	0.35228	0.15385	0.542992
Pcbp2	959	1.11635	0.16408	0.561505		0.96199	0.96876	1	0.36812	0.16408	0.561505
Efhd2	960	1.11662	0.01343	0.094797		0.33372	0.57086	1	0.062302	0.01343	0.094797
Ssb	961	1.11689	0.023584	0.135224		0.94084	0.95754	1	0.12061	0.023584	0.135224
Polr2d	962	1.12402	0.063743	0.287588		0.91997	0.94139	1	0.18977	0.063743	0.287588
Ap2m1	963	1.13465	0.46588	1		0.2957	0.51402	1	0.66149	0.46588	1
Pak1ip1	964	1.13593	0.15645	0.546833		0.16585	0.33198	1	0.35454	0.15645	0.546833
Utp6	965	1.14251	0.015982	0.105411		0.91773	0.94138	1	0.072001	0.015982	0.105411
Ccdc137	966	1.14707	0.31286	0.853263		0.78255	0.86688	1	0.53176	0.31286	0.853263
Ruvbl1	967	1.15255	0.36066	0.928745		0.59515	0.76938	1	0.59901	0.36066	0.928745
Nop9	968	1.16107	0.0021865	0.020766		0.96632	0.9718	1	0.017132	0.0021865	0.020766
Dcaf13	969	1.16285	0.036752	0.18958		0.99855	0.9995	1	0.15318	0.036752	0.18958
Rsl1d1	970	1.17169	0.52607	1		0.26795	0.48754	1	0.71126	0.52607	1
Rrs1	971	1.1814	0.10171	0.405541		0.99453	0.99767	1	0.26293	0.10171	0.405541
Eif4g1	972	1.1844	0.10029	0.405541		0.53194	0.72961	1	0.25071	0.10029	0.405541
Pqbp1	973	1.19047	0.063743	0.287588		0.60389	0.78301	1	0.19091	0.063743	0.287588
Ctnnd1	974	1.19915	0.010553	0.077889		0.80795	0.8778	1	0.054059	0.010553	0.077889
Zranb2	975	1.20038	0.056339	0.267601		0.79904	0.87614	1	0.1751	0.056339	0.267601
Nutf2-ps2	976	1.20042	0.017764	0.110675		0.12542	0.27987	1	0.093679	0.017764	0.110675
U2surp	977	1.20698	0.077076	0.334331		0.75416	0.85751	1	0.20758	0.077076	0.334331
Srrm2	978	1.20805	0.010113	0.075846		0.90965	0.9385	1	0.052986	0.010113	0.075846
Gspt1	979	1.21669	0.028743	0.157257		0.9268	0.95029	1	0.13841	0.028743	0.157257
Upf1	980	1.21755	0.0025605	0.02316		0.8431	0.90353	1	0.021784	0.0025605	0.02316
Bud13	981	1.21815	0.13094	0.479041		0.47931	0.68155	1	0.3343	0.13094	0.479041
Lsm14a	982	1.22065	0.16408	0.561505		0.9955	0.99833	1	0.3663	0.16408	0.561505
Polr2k	983	1.23375	0.032093	0.174524		0.54815	0.74708	1	0.14249	0.032093	0.174524
Gsr	984	1.23544	0.014766	0.100679		0.99693	0.99885	1	0.068249	0.014766	0.100679
Ybx1	985	1.24431	0.0331	0.178411		0.98998	0.99535	1	0.14334	0.0331	0.178411
Zfp36l2	986	1.24738	0.018573	0.113324		0.99855	0.9995	1	0.099781	0.018573	0.113324
Txn1	987	1.24742	0.0048652	0.039988		0.045416	0.11993	1	0.040334	0.0048652	0.039988
Eif2s2	988	1.2516	0.16197	0.561505		0.89329	0.9274	1	0.35657	0.16197	0.561505
Snrpd1	989	1.25391	0.056339	0.267601		0.99035	0.99535	1	0.17468	0.056339	0.267601
Cdc5l	990	1.2632	0.0055858	0.044533		0.99446	0.99767	1	0.041315	0.0055858	0.044533
Exosc8	991	1.26575	0.16408	0.561505		0.29788	0.53053	1	0.36359	0.16408	0.561505
Ddx55	992	1.26716	0.011086	0.079822		0.69694	0.84857	1	0.058142	0.011086	0.079822
Exosc2	993	1.27116	0.16408	0.561505		0.91511	0.93996	1	0.36704	0.16408	0.561505
Dnaja1	994	1.28722	0.068749	0.305549		0.71468	0.85289	1	0.19889	0.068749	0.305549
Smn1	995	1.28962	0.48495	1		0.9763	0.98223	1	0.68828	0.48495	1
Polr2g	996	1.29373	0.10029	0.405541		0.7551	0.85911	1	0.24819	0.10029	0.405541
Twf2	997	1.29415	0.21473	0.676433		0.98982	0.99535	1	0.40576	0.21473	0.676433
Xpo6	998	1.29605	0.033633	0.180177		0.98955	0.99518	1	0.14706	0.033633	0.180177
Zfp638	999	1.29738	0.028738	0.157257		0.50835	0.71733	1	0.13561	0.028738	0.157257
Tpr	1000	1.30845	0.01777	0.110675		0.45792	0.66559	1	0.095777	0.01777	0.110675
Ddx56	1001	1.30965	0.017285	0.109206		0.89049	0.92596	1	0.090569	0.017285	0.109206
Rpl7a	1002	1.31049	0.052258	0.259846		0.26336	0.48048	1	0.16634	0.052258	0.259846
Gpkow	1003	1.312	0.13094	0.479041		0.90627	0.93352	1	0.33267	0.13094	0.479041
Eif3g	1004	1.31498	0.014304	0.098687		0.90697	0.93689	1	0.065561	0.014304	0.098687
Polr2l	1005	1.31511	0.013424	0.094797		0.37643	0.60495	1	0.061778	0.013424	0.094797
Prpf31	1006	1.31976	0.015987	0.105411		0.99852	0.9995	1	0.07703	0.015987	0.105411
Zfp36l1	1007	1.33251	0.021933	0.128182		0.99473	0.99782	1	0.1144	0.021933	0.128182
Gnl3l	1008	1.33924	0.14722	0.528932		0.50232	0.71008	1	0.34032	0.14722	0.528932
Cdc40	1009	1.34502	0.035074	0.184063		0.52768	0.72714	1	0.15145	0.035074	0.184063
Isy1	1010	1.35284	0.015982	0.105411		0.97206	0.97879	1	0.070741	0.015982	0.105411
Gm21293	1011	1.3616	0.57	1		0.25455	0.46994	1	0.7614	0.57	1
Eif3j2	1012	1.36684	2.75e-06	8.1e-05		0.31901	0.55747	1	3.24e-06	2.75e-06	8.1e-05
Prpf38b	1013	1.38067	0.0025605	0.02316		0.63314	0.79981	1	0.021769	0.0025605	0.02316
Hnrnpa1	1014	1.39113	0.0053273	0.043587		0.98434	0.9915	1	0.040806	0.0053273	0.043587
Snip1	1015	1.39802	0.077082	0.334331		0.94683	0.95977	1	0.20859	0.077082	0.334331
Rbm41	1016	1.39916	0.015982	0.105411		0.078257	0.18274	1	0.070173	0.015982	0.105411
Gpatch1	1017	1.40411	0.063743	0.287588		0.96769	0.97422	1	0.19008	0.063743	0.287588
Rbm17	1018	1.41067	0.020399	0.121986		0.65823	0.82211	1	0.10753	0.020399	0.121986
Rrp8	1019	1.41333	0.034172	0.181445		0.91959	0.94139	1	0.14935	0.034172	0.181445
Gigyf1	1020	1.41355	0.0026705	0.023846		0.78572	0.86836	1	0.022117	0.0026705	0.023846
Cpsf2	1021	1.41493	0.018573	0.113324		0.77492	0.86373	1	0.10005	0.018573	0.113324
Ddx59	1022	1.41778	0.64924	1		0.99981	0.99998	1	0.83391	0.64924	1
Gm20765	1023	1.43871	0.033105	0.178411		0.99313	0.99652	1	0.1452	0.033105	0.178411
Rc3h2	1024	1.44553	0.002115	0.020739		0.4304	0.63998	1	0.01611	0.002115	0.020739
U2af1	1025	1.45027	0.0043042	0.035703		0.79409	0.87	1	0.03788	0.0043042	0.035703
Rps25	1026	1.45376	0.045949	0.23298		0.43707	0.64192	1	0.16134	0.045949	0.23298
Mak16	1027	1.46365	0.021499	0.127749		0.99913	0.99979	1	0.10935	0.021499	0.127749
Snrpd3	1028	1.47613	0.0030061	0.026062		0.9932	0.99652	1	0.026635	0.0030061	0.026062
Nsrp1	1029	1.47684	0.021933	0.128182		0.93354	0.95302	1	0.11621	0.021933	0.128182
Tnrc6b	1030	1.50124	0.0016144	0.016758		0.92708	0.95029	1	0.012997	0.0016144	0.016758
Zfp593	1031	1.50391	0.072935	0.321008		0.92559	0.95028	1	0.20207	0.072935	0.321008
Drosha	1032	1.50847	0.060404	0.280226		0.28955	0.51773	1	0.18591	0.060404	0.280226
Rbm8a	1033	1.51967	0.30614	0.853263		0.86727	0.91548	1	0.51212	0.30614	0.853263
Lsm2	1034	1.52391	0.234	0.713903		0.99332	0.99664	1	0.42772	0.234	0.713903
Rps19bp1	1035	1.52396	0.0042107	0.035089		0.70863	0.85289	1	0.036538	0.0042107	0.035089
Ssu72	1036	1.57144	0.092027	0.388846		0.9986	0.99951	1	0.22157	0.092027	0.388846
Papd4	1037	1.57604	0.01431	0.098687		0.72389	0.85289	1	0.065813	0.01431	0.098687
Ssrp1	1038	1.57938	0.034172	0.181445		0.93489	0.95414	1	0.1501	0.034172	0.181445
Imp3	1039	1.58084	0.002676	0.023846		0.87455	0.91705	1	0.022573	0.002676	0.023846
Cmss1	1040	1.58258	0.035074	0.184063		0.86655	0.91548	1	0.15112	0.035074	0.184063
Hist1h1b	1041	1.58478	0.0004758	0.005634		0.98411	0.99124	1	0.0066399	0.0004758	0.005634
Spout1	1042	1.59922	0.056345	0.267601		0.7478	0.8575	1	0.17797	0.056345	0.267601
Smg1	1043	1.60247	0.12653	0.471547		0.48911	0.69566	1	0.32303	0.12653	0.471547
Ccar1	1044	1.60411	0.0018344	0.018243		0.9093	0.9369	1	0.015046	0.0018344	0.018243
Gm4301	1045	1.60704	0.010553	0.077889		0.93961	0.95753	1	0.054143	0.010553	0.077889
Aatf	1046	1.6146	0.015982	0.105411		0.92035	0.94139	1	0.0733	0.015982	0.105411
Sf3b2	1047	1.62764	0.25189	0.733659		0.84657	0.90516	1	0.45541	0.25189	0.733659
Nvl	1048	1.63204	0.24769	0.73208		0.16333	0.33038	1	0.44678	0.24769	0.73208
Usp36	1049	1.63625	0.015982	0.105411		0.96947	0.97748	1	0.073691	0.015982	0.105411
Rbm39	1050	1.6528	0.073897	0.322876		0.95457	0.96525	1	0.2049	0.073897	0.322876
Denr	1051	1.65807	0.10171	0.405541		0.99409	0.9973	1	0.25584	0.10171	0.405541
Ikbkg	1052	1.65865	0.014766	0.100679		0.90395	0.93352	1	0.06883	0.014766	0.100679
Purb	1053	1.67067	0.0030886	0.0266		0.84684	0.90516	1	0.027302	0.0030886	0.0266
Snrpa	1054	1.67091	0.0011854	0.012853		0.99221	0.99693	1	0.011197	0.0011854	0.012853
Pes1	1055	1.67393	0.20414	0.660882		0.32536	0.55747	1	0.39646	0.20414	0.660882
Ddx51	1056	1.67618	0.015982	0.105411		0.99199	0.99624	1	0.070904	0.015982	0.105411
Hspa8	1057	1.67871	0.11123	0.426006		0.9903	0.99535	1	0.29457	0.11123	0.426006
Tut1	1058	1.68242	0.0035231	0.029773		0.93171	0.95301	1	0.0315	0.0035231	0.029773
Clp1	1059	1.71655	0.12456	0.466118		0.98295	0.98958	1	0.32103	0.12456	0.466118
Nol6	1060	1.72316	0.016724	0.107132		0.68808	0.847	1	0.086976	0.016724	0.107132
Xbp1	1061	1.72691	0.00025028	0.003754		0.99808	0.99936	1	0.0024666	0.00025028	0.003754
Nop2	1062	1.72918	0.007555	0.058115		0.93664	0.9554	1	0.04864	0.007555	0.058115
Mcl1	1063	1.73049	0.0005308	0.006164		0.93829	0.95753	1	0.0073489	0.0005308	0.006164
Ddx18	1064	1.73284	0.0055913	0.044533		0.33862	0.57458	1	0.042884	0.0055913	0.044533
Dgcr14	1065	1.73444	0.15145	0.535597		0.99097	0.99554	1	0.34889	0.15145	0.535597
Rrp15	1066	1.73553	0.0060589	0.047624		0.40675	0.62689	1	0.045395	0.0060589	0.047624
Abt1	1067	1.73976	0.31286	0.853263		0.60249	0.78062	1	0.51484	0.31286	0.853263
Exosc6	1068	1.74496	0.018573	0.113324		0.69184	0.847	1	0.09963	0.018573	0.113324
Fau	1069	1.75431	0.04217	0.214452		0.89437	0.9274	1	0.1588	0.04217	0.214452
Nol11	1070	1.75916	0.033105	0.178411		0.83914	0.90031	1	0.14448	0.033105	0.178411
Ddx42	1071	1.76418	0.028738	0.157257		0.82563	0.89138	1	0.13535	0.028738	0.157257
Bud31	1072	1.77762	0.072935	0.321008		0.19314	0.3688	1	0.20041	0.072935	0.321008
Diexf	1073	1.7826	0.024304	0.138881		0.99737	0.99905	1	0.12571	0.024304	0.138881
Utp18	1074	1.78269	0.041097	0.210157		0.99964	0.99995	1	0.1579	0.041097	0.210157
Gemin5	1075	1.79358	0.0022855	0.021315		0.98497	0.99225	1	0.019898	0.0022855	0.021315
Aqr	1076	1.79544	0.17153	0.576058		0.8767	0.91705	1	0.37628	0.17153	0.576058
Srbd1	1077	1.79978	0.007027	0.054519		0.99805	0.99932	1	0.047714	0.007027	0.054519
Rnmt	1078	1.8136	1.38e-05	0.000243		0.94358	0.9587	1	0.00080672	1.38e-05	0.000243
Txnrd1	1079	1.8144	0.0015704	0.016492		0.99639	0.9987	1	0.012844	0.0015704	0.016492
Supt5	1080	1.82564	0.056339	0.267601		0.98956	0.99518	1	0.17561	0.056339	0.267601
Pacsin2	1081	1.83491	0.00025028	0.003754		0.97437	0.98	1	0.0024236	0.00025028	0.003754
Wdr3	1082	1.86091	0.027962	0.155345		0.84643	0.90516	1	0.13371	0.027962	0.155345
Lsm8	1083	1.87145	0.01942	0.1173		0.5635	0.75844	1	0.10161	0.01942	0.1173
Rbm26	1084	1.88564	0.00063531	0.007103		0.89554	0.9274	1	0.0087536	0.00063531	0.007103
Mdn1	1085	1.89	0.016724	0.107132		0.78348	0.86689	1	0.088316	0.016724	0.107132
Noc2l	1086	1.89455	0.00081133	0.008905		0.98186	0.98859	1	0.010213	0.00081133	0.008905
Cnot1	1087	1.89655	0.00018427	0.002859		0.92902	0.95177	1	0.0020992	0.00018427	0.002859
Kri1	1088	1.90109	0.002192	0.020766		0.61351	0.78925	1	0.017476	0.002192	0.020766
Gm4312	1089	1.90164	0.00044829	0.005416		0.99159	0.99598	1	0.0062981	0.00044829	0.005416
Edf1	1090	1.91145	0.002192	0.020766		0.2539	0.46994	1	0.017599	0.002192	0.020766
Eif3m	1091	1.91255	0.0045462	0.037537		0.99943	0.99989	1	0.039293	0.0045462	0.037537
Zc3h10	1092	1.91618	0.00032728	0.004332		0.99999	1	1	0.0037871	0.00032728	0.004332
Ubtf	1093	1.92036	0.056345	0.267601		0.60356	0.78301	1	0.17875	0.056345	0.267601
Eif3e	1094	1.92564	0.062153	0.286128		0.95874	0.9671	1	0.18816	0.062153	0.286128
Eif6	1095	1.94491	0.018573	0.113324		0.99845	0.99943	1	0.099709	0.018573	0.113324
Cherp	1096	1.95055	0.0037266	0.031345		0.84268	0.90187	1	0.033794	0.0037266	0.031345
Hnrnpf	1097	1.95582	0.15145	0.535597		0.5467	0.74708	1	0.34528	0.15145	0.535597
Hist1h4a	1098	1.964	0.0021865	0.020766		0.7551	0.85911	1	0.016867	0.0021865	0.020766
Nop14	1099	1.97036	0.0088201	0.066988		0.85668	0.91251	1	0.05071	0.0088201	0.066988
Alyref	1100	1.97964	0.00228	0.021315		0.96007	0.968	1	0.019016	0.00228	0.021315
Gm4307	1101	1.98582	0.027962	0.155345		0.9449	0.95871	1	0.1332	0.027962	0.155345
Thoc6	1102	1.98836	0.00033278	0.004372		0.99794	0.99926	1	0.003959	0.00033278	0.004372
Lsm4	1103	1.992	0.042175	0.214452		0.17186	0.34021	1	0.15898	0.042175	0.214452
Hnrnpm	1104	1.99727	0.00034928	0.004459		0.99868	0.99954	1	0.0042671	0.00034928	0.004459
Tubb5	1105	2.01982	0.81015	1		0.99268	0.99652	1	0.93514	0.81015	1
Gtpbp4	1106	2.02345	0.01431	0.098687		0.81111	0.88104	1	0.066046	0.01431	0.098687
Rcc2	1107	2.02545	8.25e-06	0.00016		0.88048	0.91999	1	0.00020605	8.25e-06	0.00016
Ubc	1108	2.02545	0.010734	0.078226		0.99357	0.99664	1	0.055906	0.010734	0.078226
Bard1	1109	2.02618	0.012005	0.085789		0.91551	0.93996	1	0.058769	0.012005	0.085789
Ppp1r8	1110	2.02909	0.010366	0.077421		0.98659	0.99329	1	0.053855	0.010366	0.077421
Trp53	1111	2.06073	8.25e-06	0.00016		0.99397	0.99711	1	0.00028091	8.25e-06	0.00016
Hist1h2bp	1112	2.06455	0.17432	0.582147		0.95764	0.96622	1	0.38058	0.17432	0.582147
Tfip11	1113	2.06527	0.01431	0.098687		0.44404	0.65285	1	0.065976	0.01431	0.098687
Edc4	1114	2.07182	0.00031628	0.004217		0.35444	0.57798	1	0.0037302	0.00031628	0.004217
Hnrnpk	1115	2.09436	0.0060589	0.047624		0.94936	0.96422	1	0.044971	0.0060589	0.047624
Ttf2	1116	2.104	0.0022855	0.021315		0.99987	0.99998	1	0.019614	0.0022855	0.021315
Nufip2	1117	2.10527	0.00031628	0.004217		0.99822	0.99939	1	0.0037141	0.00031628	0.004217
Rbm38	1118	2.11218	1.93e-05	0.000336		0.99177	0.9961	1	0.0010606	1.93e-05	0.000336
Sod1	1119	2.12218	9.63e-05	0.001604		0.88437	0.92312	1	0.0016913	9.63e-05	0.001604
Cebpz	1120	2.13273	0.0018344	0.018243		0.93621	0.9554	1	0.014999	0.0018344	0.018243
Gnl3	1121	2.13455	0.025294	0.143175		0.85156	0.90979	1	0.12817	0.025294	0.143175
Sf3b3	1122	2.15964	0.097164	0.403917		0.89428	0.9274	1	0.24159	0.097164	0.403917
Cdk11b	1123	2.16418	0.002775	0.024486		0.87201	0.91705	1	0.025325	0.002775	0.024486
Ppwd1	1124	2.19182	0.002676	0.023846		0.99746	0.99907	1	0.022455	0.002676	0.023846
Ddx19a	1125	2.20964	0.00021727	0.003314		0.99459	0.99777	1	0.0022152	0.00021727	0.003314
Gm6763	1126	2.21691	0.00027778	0.004032		0.92819	0.95029	1	0.0026665	0.00027778	0.004032
Ddx23	1127	2.22582	0.0018344	0.018243		0.88146	0.91999	1	0.014876	0.0018344	0.018243
Gm21992	1128	2.23127	2.75e-06	8.1e-05		0.63937	0.80534	1	2.54e-06	2.75e-06	8.1e-05
Nat10	1129	2.24036	0.00073982	0.00817		0.98806	0.99408	1	0.0099179	0.00073982	0.00817
Eif2s1	1130	2.24873	0.023584	0.135224		0.9171	0.93996	1	0.12214	0.023584	0.135224
Tnrc6c	1131	2.26782	0.0005363	0.006188		0.97461	0.98	1	0.0074315	0.0005363	0.006188
Eif5	1132	2.28364	0.063743	0.287588		0.77161	0.86373	1	0.19188	0.063743	0.287588
Puf60	1133	2.28582	0.0055913	0.044533		0.99222	0.99625	1	0.043533	0.0055913	0.044533
Cpeb4	1134	2.28764	0.0004758	0.005634		0.98876	0.99446	1	0.0067027	0.0004758	0.005634
Dcp2	1135	2.30055	1.38e-05	0.000243		0.79103	0.86999	1	0.00076665	1.38e-05	0.000243
Wdr75	1136	2.30109	0.0029345	0.025767		0.95061	0.96422	1	0.025861	0.0029345	0.025767
Wdr36	1137	2.30909	0.00016227	0.002608		0.26014	0.47823	1	0.0018138	0.00016227	0.002608
Gm21304	1138	2.32509	0.0021315	0.020739		0.89476	0.9274	1	0.016667	0.0021315	0.020739
Nop16	1139	2.34327	0.017291	0.109206		0.98758	0.9939	1	0.09178	0.017291	0.109206
Exosc10	1140	2.35745	8.25e-06	0.00016		0.99908	0.99976	1	0.00031687	8.25e-06	0.00016
Naa38	1141	2.36582	0.0015319	0.01622		0.62725	0.79711	1	0.012254	0.0015319	0.01622
Htatsf1	1142	2.37236	0.00044279	0.005416		0.99625	0.99869	1	0.006026	0.00044279	0.005416
Ints11	1143	2.38291	0.021933	0.128182		0.99473	0.99782	1	0.11464	0.021933	0.128182
Thoc5	1144	2.38891	0.0030116	0.026062		0.6863	0.847	1	0.026915	0.0030116	0.026062
Mybbp1a	1145	2.39109	0.00044829	0.005416		0.99631	0.99869	1	0.0061883	0.00044829	0.005416
Lsm12	1146	2.39509	8.25e-06	0.00016		0.98802	0.99408	1	0.00022011	8.25e-06	0.00016
Fbl	1147	2.40727	0.020393	0.121986		0.99171	0.99598	1	0.10655	0.020393	0.121986
Dhx35	1148	2.42418	5.23e-05	0.000887		0.88793	0.92313	1	0.0015565	5.23e-05	0.000887
Wdr61	1149	2.42764	8.25e-06	0.00016		0.9919	0.99624	1	0.00032489	8.25e-06	0.00016
Sarnp	1150	2.43345	1.38e-05	0.000243		0.91765	0.94138	1	0.00085968	1.38e-05	0.000243
Api5	1151	2.43618	8.25e-06	0.00016		0.12402	0.27986	1	0.00042013	8.25e-06	0.00016
Wdr46	1152	2.45655	0.0012294	0.013172		0.87119	0.91705	1	0.011224	0.0012294	0.013172
Plrg1	1153	2.48	0.00055831	0.006401		0.42096	0.63244	1	0.0077968	0.00055831	0.006401
U2af2	1154	2.48382	0.0023735	0.021909		0.80643	0.8778	1	0.020314	0.0023735	0.021909
Mphosph10	1155	2.50545	0.0017684	0.017984		0.68378	0.84301	1	0.013969	0.0017684	0.017984
Nutf2	1156	2.51927	0.07294	0.321008		0.99858	0.99951	1	0.20323	0.07294	0.321008
Rnps1	1157	2.52673	0.00021727	0.003314		0.055245	0.13661	1	0.0022085	0.00021727	0.003314
Emg1	1158	2.53636	0.00035479	0.004466		0.83957	0.90031	1	0.0047755	0.00035479	0.004466
Exosc7	1159	2.55273	0.0016694	0.017074		0.99662	0.99879	1	0.013515	0.0016694	0.017074
Nhp2	1160	2.55309	0.00016777	0.002672		0.99663	0.99879	1	0.0019084	0.00016777	0.002672
Xab2	1161	2.55418	0.0005143	0.006011		0.97555	0.98168	1	0.0071308	0.0005143	0.006011
Rbm19	1162	2.55873	0.0004703	0.005634		0.84056	0.90031	1	0.0065694	0.0004703	0.005634
Ddx39	1163	2.56636	2.75e-06	8.1e-05		0.99916	0.9998	1	1.2e-05	2.75e-06	8.1e-05
Ldha	1164	2.58473	0.00056931	0.006445		0.88519	0.91919	1	0.0056457	0.00056931	0.006445
Eif4e2	1165	2.60382	0.00034928	0.004459		0.98327	0.99027	1	0.0043473	0.00034928	0.004459
Dazap1	1166	2.62382	8.25e-06	0.00016		0.98146	0.98859	1	0.00034455	8.25e-06	0.00016
Dnttip2	1167	2.64945	0.0018289	0.018243		0.99584	0.99846	1	0.014352	0.0018289	0.018243
Ogdh	1168	2.66018	0.0033251	0.028366		0.99982	0.99998	1	0.029519	0.0033251	0.028366
Edc3	1169	2.68145	2.75e-06	8.1e-05		0.99399	0.99711	1	6.16e-06	2.75e-06	8.1e-05
Gle1	1170	2.68182	0.00025578	0.003774		0.99968	0.99995	1	0.0025005	0.00025578	0.003774
Syf2	1171	2.68636	0.00063531	0.007103		0.98469	0.99224	1	0.0087069	0.00063531	0.007103
Spen	1172	2.69455	8.25e-06	0.00016		0.9859	0.99279	1	0.00055358	8.25e-06	0.00016
Ddx17	1173	2.69764	2.75e-06	8.1e-05		0.9988	0.99963	1	7.44e-05	2.75e-06	8.1e-05
Pwp2	1174	2.70255	8.25e-06	0.00016		0.99196	0.99624	1	0.0002527	8.25e-06	0.00016
Utp3	1175	2.71164	0.0015319	0.01622		0.99021	0.99535	1	0.012453	0.0015319	0.01622
Xrn2	1176	2.71764	0.0005143	0.006011		0.61564	0.79438	1	0.0071598	0.0005143	0.006011
G3bp1	1177	2.72018	8.25e-06	0.00016		0.99995	1	1	0.00048909	8.25e-06	0.00016
Zfp36	1178	2.72709	2.75e-06	8.1e-05		0.99723	0.99904	1	4.32e-05	2.75e-06	8.1e-05
Srsf11	1179	2.73655	2.75e-06	8.1e-05		0.91373	0.93995	1	6.14e-06	2.75e-06	8.1e-05
Rps27rt	1180	2.76109	8.25e-06	0.00016		0.78028	0.86535	1	0.00023342	8.25e-06	0.00016
Pelo	1181	2.76818	8.25e-06	0.00016		0.99959	0.99995	1	0.0001414	8.25e-06	0.00016
Ddx10	1182	2.76818	0.0012294	0.013172		0.35578	0.58718	1	0.011234	0.0012294	0.013172
Fam50a	1183	2.79	0.00017327	0.002736		0.99874	0.99959	1	0.0019228	0.00017327	0.002736
Dimt1	1184	2.79491	0.00035479	0.004466		0.85368	0.91111	1	0.0047879	0.00035479	0.004466
Sf3a3	1185	2.80764	0.0030061	0.026062		0.99049	0.99535	1	0.026575	0.0030061	0.026062
Polr2j	1186	2.82073	0.0023625	0.021909		0.99875	0.99959	1	0.020165	0.0023625	0.021909
Keap1	1187	2.84964	2.75e-06	8.1e-05		0.99997	1	1	2.63e-06	2.75e-06	8.1e-05
Phf5a	1188	2.84982	0.0055858	0.044533		0.98655	0.99329	1	0.042242	0.0055858	0.044533
Rrp7a	1189	2.85364	0.0011249	0.012271		0.83154	0.89577	1	0.010788	0.0011249	0.012271
Ccdc59	1190	2.87182	0.00029428	0.004106		0.98989	0.99535	1	0.0031058	0.00029428	0.004106
Rplp2	1191	2.87709	0.0060589	0.047624		0.99113	0.99566	1	0.045307	0.0060589	0.047624
Srsf6	1192	2.888	2.75e-06	8.1e-05		0.98043	0.98737	1	0.00010555	2.75e-06	8.1e-05
Eloa	1193	2.90218	8.25e-06	0.00016		0.78386	0.86689	1	0.00027336	8.25e-06	0.00016
Ppil4	1194	2.90691	0.00028328	0.004047		0.98578	0.99279	1	0.0027977	0.00028328	0.004047
Ddx21	1195	2.95073	0.0033746	0.028652		0.9514	0.96423	1	0.030767	0.0033746	0.028652
Rpn1	1196	2.97145	0.00030528	0.004217		0.98898	0.99493	1	0.0033356	0.00030528	0.004217
Rack1	1197	2.98582	0.00038229	0.004779		0.99938	0.99987	1	0.0051673	0.00038229	0.004779
Eif1ad	1198	3.01145	0.00056381	0.006423		0.98633	0.99328	1	0.0080118	0.00056381	0.006423
Gm4305	1199	3.05345	7.98e-05	0.001342		0.99695	0.9989	1	0.0016469	7.98e-05	0.001342
Dhx8	1200	3.05618	0.0021865	0.020766		0.96514	0.96961	1	0.017203	0.0021865	0.020766
Snrnp70	1201	3.06109	0.00034928	0.004459		0.91471	0.93996	1	0.0042941	0.00034928	0.004459
Hexim1	1202	3.06727	2.75e-06	8.1e-05		0.99748	0.99911	1	2.34e-05	2.75e-06	8.1e-05
Dcp1a	1203	3.06909	0.00010726	0.001755		0.99955	0.99994	1	0.0017656	0.00010726	0.001755
Tbl3	1204	3.09073	0.00028328	0.004047		0.98333	0.99027	1	0.0027964	0.00028328	0.004047
Slbp	1205	3.09109	2.48e-05	0.000428		0.81521	0.88236	1	0.0012029	2.48e-05	0.000428
Pcid2	1206	3.10509	8.25e-06	0.00016		0.26857	0.48754	1	0.00019811	8.25e-06	0.00016
Sart3	1207	3.10818	0.00031628	0.004217		0.81358	0.88236	1	0.0036106	0.00031628	0.004217
Ranbp2	1208	3.11782	0.00010726	0.001755		0.83799	0.9003	1	0.0017694	0.00010726	0.001755
Irf8	1209	3.14255	2.75e-06	8.1e-05		1	1	1	2.73e-07	2.75e-06	8.1e-05
Spi1	1210	3.17818	2.75e-06	8.1e-05		0.99926	0.99983	1	9.87e-05	2.75e-06	8.1e-05
Eif3d	1211	3.19018	0.00018427	0.002859		0.97876	0.98533	1	0.0021476	0.00018427	0.002859
Polr2e	1212	3.206	0.0065154	0.050769		0.89029	0.92596	1	0.046813	0.0065154	0.050769
Ipo7	1213	3.21073	1.38e-05	0.000243		0.95096	0.96423	1	0.00070488	1.38e-05	0.000243
Polr2h	1214	3.22073	0.010734	0.078226		0.99782	0.99923	1	0.055857	0.010734	0.078226
Rrp9	1215	3.25982	8.25e-06	0.00016		0.99997	1	1	0.00040792	8.25e-06	0.00016
Snw1	1216	3.26182	1.38e-05	0.000243		0.96607	0.97179	1	0.00085582	1.38e-05	0.000243
Fam46c	1217	3.28109	2.75e-06	8.1e-05		0.9985	0.9995	1	1.26e-07	2.75e-06	8.1e-05
Gm21312	1218	3.31745	2.75e-06	8.1e-05		0.92651	0.95029	1	6.46e-05	2.75e-06	8.1e-05
Thoc7	1219	3.34855	8.25e-06	0.00016		0.95066	0.96422	1	0.00019631	8.25e-06	0.00016
Exosc4	1220	3.39327	8.25e-06	0.00016		0.97742	0.98372	1	0.00018121	8.25e-06	0.00016
Xpo5	1221	3.41491	8.25e-06	0.00016		0.99612	0.99861	1	0.00016163	8.25e-06	0.00016
Luc7l3	1222	3.428	1.38e-05	0.000243		0.56665	0.75844	1	0.00096852	1.38e-05	0.000243
Ppan	1223	3.42982	0.00044279	0.005416		0.62502	0.79711	1	0.0060302	0.00044279	0.005416
Hnrnpl	1224	3.43927	8.25e-06	0.00016		0.95899	0.9671	1	0.00013003	8.25e-06	0.00016
Rrp36	1225	3.47964	8.25e-06	0.00016		0.26183	0.47823	1	0.00050795	8.25e-06	0.00016
Nupl2	1226	3.48418	2.75e-06	8.1e-05		0.99997	1	1	4.74e-05	2.75e-06	8.1e-05
Tcerg1	1227	3.50091	2.75e-06	8.1e-05		0.58413	0.7672	1	9.83e-06	2.75e-06	8.1e-05
Ddx47	1228	3.53564	0.0015759	0.016492		0.99607	0.99861	1	0.012971	0.0015759	0.016492
Kpna2	1229	3.53891	2.75e-06	8.1e-05		0.99757	0.99911	1	8.78e-05	2.75e-06	8.1e-05
Polr2i	1230	3.57364	0.00027778	0.004032		0.99636	0.9987	1	0.0027005	0.00027778	0.004032
Nup155	1231	3.57964	2.75e-06	8.1e-05		0.99899	0.99972	1	0.00010531	2.75e-06	8.1e-05
Thoc1	1232	3.60945	0.00040429	0.005019		0.99895	0.99972	1	0.0053315	0.00040429	0.005019
Bcl6	1233	3.62655	2.75e-06	8.1e-05		0.99996	1	1	3.77e-08	2.75e-06	8.1e-05
Ipo5	1234	3.63782	2.75e-06	8.1e-05		0.70296	0.85289	1	7.26e-08	2.75e-06	8.1e-05
Cnot10	1235	3.64927	8.25e-06	0.00016		0.46775	0.67304	1	0.00025753	8.25e-06	0.00016
Prpf8	1236	3.65727	0.00031078	0.004217		0.94972	0.96422	1	0.0034786	0.00031078	0.004217
Ago2	1237	3.65891	2.75e-06	8.1e-05		0.99991	1	1	7.53e-06	2.75e-06	8.1e-05
Gar1	1238	3.69255	8.25e-06	0.00016		0.94657	0.95977	1	0.00022036	8.25e-06	0.00016
Nup98	1239	3.724	2.75e-06	8.1e-05		1	1	1	2.61e-06	2.75e-06	8.1e-05
Cnot11	1240	3.73091	2.75e-06	8.1e-05		0.86163	0.91396	1	1.63e-05	2.75e-06	8.1e-05
Rbm33	1241	3.75836	2.75e-06	8.1e-05		0.99891	0.99967	1	7.7e-07	2.75e-06	8.1e-05
Pdia3	1242	3.81345	2.75e-06	8.1e-05		1	1	1	4.47e-07	2.75e-06	8.1e-05
Rbm22	1243	3.84073	8.25e-06	0.00016		0.99842	0.99943	1	0.00012384	8.25e-06	0.00016
Uba1	1244	3.84291	0.00073982	0.00817		0.99884	0.99963	1	0.0098836	0.00073982	0.00817
Mfap1b	1245	3.874	3.03e-05	0.000519		0.99997	1	1	0.0012734	3.03e-05	0.000519
Rrp12	1246	3.87727	2.75e-06	8.1e-05		0.72225	0.85289	1	9.63e-05	2.75e-06	8.1e-05
Polr2b	1247	3.89673	0.00029428	0.004106		0.95619	0.96622	1	0.0031121	0.00029428	0.004106
Snu13	1248	3.936	0.030228	0.164881		0.5765	0.76475	1	0.14051	0.030228	0.164881
Srsf3	1249	3.96891	0.002126	0.020739		0.99074	0.99535	1	0.01636	0.002126	0.020739
Rngtt	1250	3.97309	0.00016227	0.002608		0.93744	0.95647	1	0.0018286	0.00016227	0.002608
Srpk1	1251	3.99618	2.75e-06	8.1e-05		0.74716	0.8575	1	1.32e-05	2.75e-06	8.1e-05
Ddx49	1252	4.03709	2.75e-06	8.1e-05		0.99947	0.99992	1	8.7e-05	2.75e-06	8.1e-05
Rae1	1253	4.04691	0.00031628	0.004217		0.95785	0.96709	1	0.0036776	0.00031628	0.004217
Eif3k	1254	4.08018	2.75e-06	8.1e-05		1	1	1	5.72e-08	2.75e-06	8.1e-05
Cpsf6	1255	4.09055	2.75e-06	8.1e-05		0.99942	0.99989	1	3.34e-05	2.75e-06	8.1e-05
Serbp1	1256	4.09673	2.75e-06	8.1e-05		0.83034	0.89577	1	3.35e-06	2.75e-06	8.1e-05
Gapdh-ps15	1257	4.11109	0.00028878	0.004093		0.85911	0.91395	1	0.0029048	0.00028878	0.004093
Eif1ax	1258	4.12491	2.75e-06	8.1e-05		0.91422	0.93996	1	3.8e-07	2.75e-06	8.1e-05
Ptprc	1259	4.13745	2.75e-06	8.1e-05		0.99934	0.99986	1	2.09e-06	2.75e-06	8.1e-05
Tnpo3	1260	4.14873	8.25e-06	0.00016		0.99997	1	1	0.00015958	8.25e-06	0.00016
Supt4a	1261	4.18945	2.75e-06	8.1e-05		0.99352	0.99664	1	2.62e-05	2.75e-06	8.1e-05
Ppil1	1262	4.24927	8.25e-06	0.00016		0.50077	0.71007	1	0.00058339	8.25e-06	0.00016
Hnrnpc	1263	4.402	1.38e-05	0.000243		0.99998	1	1	0.0005958	1.38e-05	0.000243
Nxf1	1264	4.66509	2.75e-06	8.1e-05		0.99934	0.99986	1	4e-08	2.75e-06	8.1e-05
Pnkp	1265	4.69509	2.75e-06	8.1e-05		1	1	1	1.62e-09	2.75e-06	8.1e-05
Wdr43	1266	4.71655	8.25e-06	0.00016		0.6231	0.79711	1	0.00029702	8.25e-06	0.00016
Rbm15	1267	4.73236	2.75e-06	8.1e-05		0.99863	0.99951	1	4.51e-08	2.75e-06	8.1e-05
Heatr1	1268	4.84382	0.00025578	0.003774		0.157	0.32356	1	0.0025152	0.00025578	0.003774
Sf3b6	1269	5.05309	8.25e-06	0.00016		0.99807	0.99932	1	0.00019991	8.25e-06	0.00016
Elavl1	1270	5.06618	2.75e-06	8.1e-05		1	1	1	1.35e-08	2.75e-06	8.1e-05
Snrpe	1271	5.08509	0.0016639	0.017074		0.99338	0.99664	1	0.013377	0.0016639	0.017074
Ddx39b	1272	5.12727	2.75e-06	8.1e-05		0.87305	0.91705	1	3.01e-08	2.75e-06	8.1e-05
Thoc3	1273	5.388	2.75e-06	8.1e-05		1	1	1	9.33e-07	2.75e-06	8.1e-05
Sumo2	1274	5.46273	8.25e-06	0.00016		0.99998	1	1	0.00046221	8.25e-06	0.00016
Nop58	1275	5.48145	8.25e-06	0.00016		0.99755	0.99911	1	0.00024055	8.25e-06	0.00016
Nudt21	1276	5.49218	2.75e-06	8.1e-05		0.99997	1	1	5.51e-06	2.75e-06	8.1e-05
Prpf19	1277	5.51655	8.25e-06	0.00016		0.99978	0.99998	1	0.00043881	8.25e-06	0.00016
Snrpb	1278	5.52582	8.25e-06	0.00016		0.6397	0.80719	1	0.00028778	8.25e-06	0.00016
Dhx33	1279	5.548	2.75e-06	8.1e-05		0.99905	0.99974	1	1.08e-06	2.75e-06	8.1e-05
Eif3l	1280	5.57436	2.75e-06	8.1e-05		0.93151	0.95301	1	7.77e-08	2.75e-06	8.1e-05
Bysl	1281	5.74691	8.25e-06	0.00016		0.88298	0.92312	1	0.00020466	8.25e-06	0.00016
Il2rg	1282	5.83436	1.38e-05	0.000243		0.96375	0.96961	1	0.00092827	1.38e-05	0.000243
Dnmt1	1283	5.87455	2.75e-06	8.1e-05		0.99987	0.99999	1	2.41e-07	2.75e-06	8.1e-05
Dkc1	1284	6.14909	2.75e-06	8.1e-05		0.8922	0.9274	1	4.67e-05	2.75e-06	8.1e-05
Pten	1285	6.81618	2.75e-06	8.1e-05		0.99587	0.99846	1	2.91e-08	2.75e-06	8.1e-05
Nxt1	1286	6.87818	2.75e-06	8.1e-05		0.99878	0.99963	1	1.72e-06	2.75e-06	8.1e-05
Tnrc6a	1287	7.33764	2.75e-06	8.1e-05		0.85538	0.91251	1	7.07e-12	2.75e-06	8.1e-05
Rbm14	1288	7.37764	2.75e-06	8.1e-05		1	1	1	3.36e-11	2.75e-06	8.1e-05
Ran	1289	7.63855	2.75e-06	8.1e-05		0.74737	0.8575	1	1.98e-05	2.75e-06	8.1e-05
Hist1h1d	1290	7.86909	2.75e-06	8.1e-05		0.9767	0.98224	1	4.15e-08	2.75e-06	8.1e-05
Ikzf1	1291	8.25073	2.75e-06	8.1e-05		1	1	1	1.75e-11	2.75e-06	8.1e-05
Ddx5	1292	8.26909	2.75e-06	8.1e-05		1	1	1	5.87e-16	2.75e-06	8.1e-05
Eif3j1	1293	8.41709	2.75e-06	8.1e-05		0.99949	0.99992	1	2.37e-10	2.75e-06	8.1e-05
Dynll1	1294	9.14582	2.75e-06	8.1e-05		1	1	1	1.23e-16	2.75e-06	8.1e-05
Ddx6	1295	9.45418	2.75e-06	8.1e-05		1	1	1	4.57e-15	2.75e-06	8.1e-05
Tardbp	1296	9.62891	2.75e-06	8.1e-05		0.99213	0.99625	1	8.52e-15	2.75e-06	8.1e-05
Cnot9	1297	10.09	2.75e-06	8.1e-05		0.99356	0.99664	1	3.04e-16	2.75e-06	8.1e-05
Bach2	1298	13.5447	2.75e-06	8.1e-05		0.45835	0.66559	1	5.39e-21	2.75e-06	8.1e-05
Stat3	1299	14.7225	2.75e-06	8.1e-05		0.7173	0.85289	1	2.01e-18	2.75e-06	8.1e-05
Hist1h1e	1300	15.598	2.75e-06	8.1e-05		1	1	1	3.95e-13	2.75e-06	8.1e-05

## Sheet: 1E - accumulation only
Differentiation:	Gene name	Rank	Z score (lfc)	p-value	FDR		neg|score	neg|p-value	neg|fdr	pos|score	pos|p-value	pos|fdr		Proliferation/survival:	Gene name	Rank	Z score (lfc)	p-value	FDR		neg|score	neg|p-value	neg|fdr	pos|score	pos|p-value	pos|fdr
	Prdm1	1	-21.2818	2.75e-06	0.00019		4.25e-28	2.75e-06	0.00019	1	1	1			Prdm1	554	-0.254581	0.0011964	0.003613		0.3076	0.0011964	0.003613	0.028164	0.051994	1
	Atp2a2	2	-10.8224	2.75e-06	0.00019		3.86e-18	2.75e-06	0.00019	1	1	1			Atp2a2	410	-1.68175	2.7503e-06	1e-05		0.0006003	2.7503e-06	1e-05	0.9994	1	1
	Huwe1	6	-6.76618	2.75e-06	0.00019		1.25e-11	2.75e-06	0.00019	0.99986	0.99947	1			Huwe1	478	-0.86225	2.7503e-06	1e-05		0.035744	2.7503e-06	1e-05	0.10675	0.1989	1
	Rptor	7	-6.31109	2.75e-06	0.00019		1.26e-07	2.75e-06	0.00019	0.95452	0.84983	1			Rptor	418	-1.55919	2.7503e-06	1e-05		0.0082826	2.7503e-06	1e-05	0.99469	1	1
	Cdk13	8	-6.20236	2.75e-06	0.00019		1.11e-16	2.75e-06	0.00019	1	1	1			Cdk13	1114	0.9435	0.91318	1		0.99109	0.64707	1	0.64229	0.91318	1
	Ipo9	11	-5.98364	2.75e-06	0.00019		9.27e-12	2.75e-06	0.00019	0.99985	0.99944	1			Ipo9	1080	0.864687	0.96057	1		0.99723	0.74548	1	0.74946	0.96057	1
	Ythdf2	12	-5.85927	2.75e-06	0.00019		2.56e-08	2.75e-06	0.00019	1	1	1			Ythdf2	458	-1.10519	2.7503e-06	1e-05		0.0013267	2.7503e-06	1e-05	0.94601	0.99885	1
	Patl1	14	-5.61182	2.75e-06	0.00019		7.44e-11	2.75e-06	0.00019	1	1	1			Patl1	575	-0.198013	0.00060781	0.001877		0.26398	0.00060781	0.001877	0.94443	0.99867	1
	Prrc2a	15	-5.54873	2.75e-06	0.00019		8.65e-09	2.75e-06	0.00019	0.99982	0.99935	1			Prrc2a	609	-0.0833437	0.0004703	0.001483		0.23517	0.0004703	0.001483	0.79864	0.97379	1
	Akt1	16	-5.21436	2.75e-06	0.00019		2.52e-10	2.75e-06	0.00019	1	1	1			Akt1	437	-1.29481	2.7503e-06	1e-05		0.00020175	2.7503e-06	1e-05	0.9998	1	1
	Eif4h	18	-5.16709	2.75e-06	0.00019		1.24e-08	2.75e-06	0.00019	1	1	1			Eif4h	630	-0.00849187	0.0088146	0.02426		0.53389	0.0088146	0.02426	0.70832	0.94099	1
	Tufm	21	-4.78982	2.75e-06	0.00019		2.88e-07	2.75e-06	0.00019	0.99749	0.98906	1			Tufm	414	-1.64319	2.7503e-06	1e-05		0.0030262	2.7503e-06	1e-05	0.18081	0.39936	1
	Cnbp	22	-4.77182	2.75e-06	0.00019		8.04e-09	2.75e-06	0.00019	0.99757	0.98907	1			Cnbp	952	0.661375	0.051994	0.073485		0.71449	0.029838	0.073485	0.025995	0.051994	1
	Jmjd6	23	-4.76491	2.75e-06	0.00019		1.38e-10	2.75e-06	0.00019	1	1	1			Jmjd6	797	0.417275	0.87463	0.111806		0.76071	0.047263	0.111806	0.56239	0.87463	1
	Eif2b1	24	-4.67091	0.00059681	0.020269		0.0001214	0.00059681	0.020269	0.99999	0.99998	1			Eif2b1	390	-1.86056	2.7503e-06	1e-05		0.0049371	2.7503e-06	1e-05	0.98858	0.99998	1
	Elac2	26	-4.12509	2.75e-06	0.00019		2.76e-07	2.75e-06	0.00019	0.99024	0.96406	1			Elac2	511	-0.540975	5.7756e-05	0.000194		0.11307	5.7756e-05	0.000194	0.52889	0.84791	1
	Mrps27	27	-4.09491	2.75e-06	0.00019		3.22e-07	2.75e-06	0.00019	0.99996	0.99982	1			Mrps27	434	-1.32519	2.7503e-06	1e-05		0.0061232	2.7503e-06	1e-05	0.99684	1	1
	Bcl2l1	28	-4.07582	4.68e-05	0.002275		7.79e-06	4.68e-05	0.002275	0.99523	0.97659	1			Bcl2l1	824	0.454375	0.85844	0.212889		0.84854	0.098875	0.212889	0.54918	0.85844	1
	Strap	29	-3.97073	3.03e-05	0.00165		3.48e-06	3.03e-05	0.00165	0.77666	0.58286	1			Strap	751	0.321394	0.99929	0.306234		0.90177	0.14869	0.306234	0.95761	0.99929	1
	Akap8	30	-3.944	6.88e-05	0.003173		1.28e-05	6.88e-05	0.003173	0.98932	0.96185	1			Akap8	1073	0.854188	0.47103	0.888111		0.98427	0.53878	0.888111	0.21245	0.47103	1
	Ythdf1	31	-3.91145	2.75e-06	0.00019		6.04e-09	2.75e-06	0.00019	1	1	1			Ythdf1	1138	0.984312	0.10067	1		0.99568	0.70764	1	0.060876	0.10067	1
	Mtrf1l	34	-3.77455	8.25e-06	0.00053		6.27e-07	8.25e-06	0.00053	0.862	0.66648	1			Mtrf1l	435	-1.30406	7.9758e-05	0.000267		0.11909	7.9758e-05	0.000267	0.15379	0.33358	1
	Csde1	35	-3.75182	0.00018427	0.008292		2.54e-05	0.00018427	0.008292	0.91398	0.74978	1			Csde1	1148	1.00537	0.018886	0.185327		0.82225	0.084524	0.185327	0.0055433	0.018886	1
	Lrpprc	38	-3.63673	0.00026128	0.010224		4.57e-05	0.00026128	0.010224	0.99999	0.99997	1			Lrpprc	686	0.1838	0.99949	0.037227		0.59006	0.014079	0.037227	0.96647	0.99949	1
	Ssbp1	39	-3.63473	0.0055693	0.132686		0.001461	0.0055693	0.132686	0.99778	0.98935	1			Ssbp1	415	-1.642	2.7503e-06	1e-05		0.032927	2.7503e-06	1e-05	0.88984	0.99214	1
	Syncrip	41	-3.54309	8.25e-06	0.00053		6.87e-07	8.25e-06	0.00053	1	1	1			Syncrip	580	-0.178994	0.0049807	0.01398		0.47773	0.0049807	0.01398	0.98033	0.99989	1
	Nomo1	43	-3.42236	4.68e-05	0.002275		8.91e-06	4.68e-05	0.002275	0.99999	1	1			Nomo1	472	-0.926562	0.00012926	0.000422		0.13652	0.00012926	0.000422	0.97626	0.9998	1
	Ywhae	45	-3.39764	1.93e-05	0.001118		1.03e-06	1.93e-05	0.001118	0.99999	1	1			Ywhae	459	-1.0795	2.7503e-06	1e-05		0.0067524	2.7503e-06	1e-05	0.82044	0.97914	1
	Anp32b	46	-3.28782	4.68e-05	0.002275		1.18e-05	4.68e-05	0.002275	0.99988	0.99958	1			Anp32b	1103	0.922375	0.73947	1e-05		0.025995	2.7503e-06	1e-05	0.46	0.73947	1
	Celf2	47	-3.28291	0.00023377	0.009786		3.25e-05	0.00023377	0.009786	0.99588	0.98152	1			Celf2	743	0.303844	0.94099	0.130536		0.78221	0.05613	0.130536	0.70906	0.94099	1
	Ptcd3	48	-3.27127	0.0005253	0.01854		9.28e-05	0.0005253	0.01854	1	1	1			Ptcd3	492	-0.741437	0.00017327	0.000561		0.15401	0.00017327	0.000561	0.30888	0.60945	1
	Manf	49	-3.22345	0.0030886	0.089668		0.00070198	0.0030886	0.089668	0.99144	0.96509	1			Manf	535	-0.376325	0.0014989	0.004467		0.32594	0.0014989	0.004467	0.7034	0.93941	1
	Tsfm	51	-3.22055	3.03e-05	0.00165		2.55e-06	3.03e-05	0.00165	0.99903	0.99615	1			Tsfm	514	-0.523987	0.00013476	0.000439		0.14627	0.00013476	0.000439	0.093951	0.1989	1
	Sec63	52	-3.20636	0.00066832	0.022277		0.00014068	0.00066832	0.022277	0.99999	1	1			Sec63	506	-0.632	0.00096535	0.00294		0.2851	0.00096535	0.00294	0.32777	0.62663	1
	Brd2	53	-3.18018	0.00059681	0.020269		0.00012254	0.00059681	0.020269	0.99995	0.99982	1			Brd2	386	-1.91987	2.7503e-06	1e-05		0.003073	2.7503e-06	1e-05	0.52738	0.84791	1
	Dhx30	54	-3.17345	4.13e-05	0.002184		6.57e-06	4.13e-05	0.002184	0.98645	0.9528	1			Dhx30	587	-0.143019	0.013881	0.03707		0.58711	0.013881	0.03707	0.56973	0.87463	1
	Ilf3	57	-3.114	2.75e-06	0.00019		1.58e-07	2.75e-06	0.00019	0.99798	0.99029	1			Ilf3	628	-0.00998813	0.015701	0.040915		0.60348	0.015701	0.040915	0.35574	0.65818	1
	Nelfe	58	-3.09509	0.00029428	0.01127		5.27e-05	0.00029428	0.01127	0.50978	0.30614	0.853263			Nelfe	657	0.101731	0.99759	0.133791		0.78696	0.057753	0.133791	0.93021	0.99759	1
	Mtif3	59	-3.06255	0.0039411	0.105881		0.00095496	0.0039411	0.105881	0.98039	0.92935	1			Mtif3	1224	1.2245	0.58258	1		0.99753	0.75312	1	0.28075	0.58258	1
	Tefm	60	-3.01782	1.93e-05	0.001118		1.1e-06	1.93e-05	0.001118	0.99972	0.999	1			Tefm	1150	1.00631	0.39936	0.120402		0.7751	0.051438	0.120402	0.18205	0.39936	1
	Ddx28	61	-3.01327	1.38e-05	0.000854		7.28e-07	1.38e-05	0.000854	0.9965	0.98452	1			Ddx28	697	0.209444	0.50415	0.16724		0.81728	0.07563	0.16724	0.22902	0.50415	1
	Luc7l2	63	-2.91764	0.0064384	0.146698		0.0017514	0.0064384	0.146698	0.9978	0.99002	1			Luc7l2	467	-1.01044	2.7503e-06	1e-05		0.029669	2.7503e-06	1e-05	0.93155	0.99764	1
	Pum1	65	-2.87291	2.75e-06	0.00019		1.54e-07	2.75e-06	0.00019	0.99516	0.97594	1			Pum1	1141	0.992	0.91318	1e-05		0.045357	2.7503e-06	1e-05	0.63964	0.91318	1
	Ociad1	69	-2.78964	0.015135	0.28992		0.0042671	0.015135	0.28992	0.99205	0.96604	1			Ociad1	1003	0.748563	0.97788	0.217144		0.8551	0.10133	0.217144	0.81254	0.97788	1
	Thrap3	71	-2.71473	0.01398	0.275882		0.0034209	0.01398	0.275882	0.93211	0.8059	1			Thrap3	607	-0.0868312	0.0032261	0.009291		0.40089	0.0032261	0.009291	0.64667	0.91756	1
	Ankrd17	72	-2.71473	0.0005198	0.01854		8.9e-05	0.0005198	0.01854	0.99275	0.96605	1			Ankrd17	603	-0.0915812	0.00029978	0.00096		0.17865	0.00029978	0.00096	0.59962	0.8966	1
	Fubp1	73	-2.71145	0.00024477	0.009791		4.13e-05	0.00024477	0.009791	0.98927	0.96185	1			Fubp1	1287	1.72475	0.65818	1		0.99998	0.99109	1	0.35474	0.65818	1
	Rpusd4	74	-2.69364	0.0017464	0.05515		0.00033044	0.0017464	0.05515	0.99997	0.99994	1			Rpusd4	826	0.456944	0.64281	0.140736		0.79218	0.061455	0.140736	0.3396	0.64281	1
	Mbnl2	75	-2.61727	0.0036331	0.100609		0.00091354	0.0036331	0.100609	0.39413	0.20413	0.660882			Mbnl2	1245	1.31419	0.39936	1		0.99965	0.9265	1	0.1696	0.39936	1
	Secisbp2l	76	-2.60036	0.0084241	0.184919		0.0021238	0.0084241	0.184919	0.86238	0.66648	1			Secisbp2l	1156	1.02081	0.91955	0.268051		0.87978	0.12718	0.268051	0.65614	0.91955	1
	Enox2	77	-2.58764	0.02173	0.369092		0.0065258	0.02173	0.369092	0.60163	0.36066	0.928745			Enox2	1210	1.17813	0.85154	0.871394		0.98161	0.51605	0.871394	0.54116	0.85154	1
	Slc25a5	78	-2.54255	0.0056023	0.132686		0.0015269	0.0056023	0.132686	0.9957	0.9804	1			Slc25a5	565	-0.228994	2.7503e-06	1e-05		0.027071	2.7503e-06	1e-05	0.99746	1	1
	Tfam	79	-2.52127	0.017676	0.318168		0.0053864	0.017676	0.318168	0.99744	0.98906	1			Tfam	717	0.249131	0.89661	0.100065		0.7487	0.041471	0.100065	0.60495	0.89661	1
	Ptcd1	80	-2.51418	0.002852	0.088511		0.00066878	0.002852	0.088511	0.99998	0.99994	1			Ptcd1	881	0.543581	0.051994	0.067799		0.68766	0.027082	0.067799	0.029607	0.051994	1
	Paip1	83	-2.49418	0.018793	0.334918		0.0057537	0.018793	0.334918	0.97526	0.90933	1			Paip1	786	0.399938	0.89661	0.298938		0.89739	0.14432	0.298938	0.60895	0.89661	1
	Hspd1	84	-2.44145	0.010454	0.226709		0.0025628	0.010454	0.226709	0.26766	0.10318	0.405541			Hspd1	388	-1.89444	2.7503e-06	1e-05		0.00045433	2.7503e-06	1e-05	0.99071	0.99999	1
	Irak3	85	-2.43455	0.00038779	0.014245		6.49e-05	0.00038779	0.014245	0.982	0.93316	1			Irak3	1198	1.1335	0.89661	0.250006		0.87056	0.11778	0.250006	0.60544	0.89661	1
	Angel1	88	-2.40382	0.00023377	0.009786		3.23e-05	0.00023377	0.009786	0.99745	0.98906	1			Angel1	733	0.288656	0.52479	0.474314		0.93662	0.25297	0.474314	0.2424	0.52479	1
	Vapa	90	-2.33909	0.01514	0.28992		0.0045618	0.01514	0.28992	0.93769	0.81854	1			Vapa	1260	1.38075	0.035421	0.067799		0.6872	0.027082	0.067799	0.015086	0.035421	1
	Trip12	91	-2.29236	0.0075	0.166789		0.0019566	0.0075	0.166789	0.97703	0.91603	1			Trip12	1058	0.825	0.23037	0.204055		0.83288	0.0942	0.204055	0.11939	0.23037	1
	Pnpt1	92	-2.26636	0.10085	0.984164		0.03718	0.10085	0.984164	0.65987	0.43034	1			Pnpt1	436	-1.30069	2.7503e-06	1e-05		0.00028806	2.7503e-06	1e-05	0.73142	0.95372	1
	Hnrnpll	93	-2.25473	0.0055693	0.132686		0.0014535	0.0055693	0.132686	0.95866	0.85339	1			Hnrnpll	842	0.472131	0.87137	0.303117		0.89972	0.14667	0.303117	0.55921	0.87137	1
	Ythdf3	94	-2.23982	0.016669	0.30318		0.0050538	0.016669	0.30318	0.97583	0.90933	1			Ythdf3	1223	1.21913	0.47103	0.89103		0.98471	0.54352	0.89103	0.20885	0.47103	1
	Cstf2	96	-2.16982	0.0039411	0.105881		0.00095969	0.0039411	0.105881	0.7096	0.52606	1			Cstf2	825	0.4559	0.39936	0.068516		0.68925	0.027406	0.068516	0.17273	0.39936	1
	Hnrnpab	97	-2.15382	0.0053878	0.132686		0.0013533	0.0053878	0.132686	0.86883	0.67528	1			Hnrnpab	576	-0.197162	0.0015044	0.004476		0.33011	0.0015044	0.004476	0.84829	0.98383	1
	Agfg1	98	-2.15127	0.015514	0.293955		0.0046475	0.015514	0.293955	0.69133	0.4955	1			Agfg1	704	0.222575	0.88642	0.114523		0.76564	0.048545	0.114523	0.58643	0.88642	1
	Mov10	99	-2.11655	0.0061579	0.14395		0.0016306	0.0061579	0.14395	0.94396	0.83108	1			Mov10	1096	0.908687	0.91317	0.944081		0.98789	0.589	0.944081	0.63308	0.91317	1
	Mrpl44	100	-2.11327	0.016669	0.30318		0.0050316	0.016669	0.30318	0.74239	0.56151	1			Mrpl44	454	-1.13725	2.7503e-06	1e-05		0.027926	2.7503e-06	1e-05	0.57679	0.87783	1
	Tmed9	101	-2.09436	0.0031491	0.089973		0.00076665	0.0031491	0.089973	0.94566	0.83499	1			Tmed9	600	-0.1081	0.0029565	0.008542		0.37195	0.0029565	0.008542	0.99697	1	1
	Wdr33	102	-2.08891	0.03223	0.483457		0.010571	0.03223	0.483457	0.99009	0.96297	1			Wdr33	572	-0.208137	8.5259e-05	0.000284		0.12131	8.5259e-05	0.000284	0.63218	0.91317	1
	Zc3h15	103	-2.08345	0.077544	0.856375		0.027475	0.077544	0.856375	0.97356	0.90432	1			Zc3h15	1072	0.850688	0.69466	0.153725		0.8054	0.068402	0.153725	0.42136	0.69466	1
	Hic2	104	-2.06164	0.0075055	0.166789		0.0019664	0.0075055	0.166789	0.98498	0.94621	1			Hic2	806	0.426075	0.66605	0.111806		0.76056	0.047263	0.111806	0.37006	0.66605	1
	Clasp2	106	-2.05509	0.039486	0.546725		0.013306	0.039486	0.546725	0.5837	0.34964	0.918761			Clasp2	561	-0.235137	0.00056381	0.001753		0.25254	0.00056381	0.001753	0.958	0.99929	1
	Zc3h3	108	-2.03345	0.059073	0.723345		0.018555	0.059073	0.723345	0.99139	0.96509	1			Zc3h3	452	-1.14106	1.9252e-05	6.5e-05		0.08362	1.9252e-05	6.5e-05	0.18452	0.4116	1
	Srsf9	110	-2.016	0.00072882	0.023852		0.00015545	0.00072882	0.023852	0.87317	0.67528	1			Srsf9	841	0.4721	0.95858	0.484613		0.93846	0.26115	0.484613	0.74516	0.95858	1
	Rcc2	1107	2.02545	8.25e-06	0.00016		0.88048	0.91999	1	0.00020605	8.25e-06	0.00016			Rcc2	1209	1.17056	0.57357	1		0.99994	0.98039	1	0.27854	0.57357	1
	Edc4	1114	2.07182	0.00031628	0.004217		0.35444	0.57798	1	0.0037302	0.00031628	0.004217			Edc4	859	0.502294	0.084277	0.697172		0.96971	0.39583	0.697172	0.040371	0.084277	1
	Ttf2	1116	2.104	0.0022855	0.021315		0.99987	0.99998	1	0.019614	0.0022855	0.021315			Ttf2	636	0.0153013	0.99939	0.022749		0.52488	0.0082151	0.022749	0.96173	0.99939	1
	Nufip2	1117	2.10527	0.00031628	0.004217		0.99822	0.99939	1	0.0037141	0.00031628	0.004217			Nufip2	924	0.6138	0.78813	0.905682		0.98637	0.558	0.905682	0.47967	0.78813	1
	Rbm38	1118	2.11218	1.93e-05	0.000336		0.99177	0.9961	1	0.0010606	1.93e-05	0.000336			Rbm38	836	0.4683	0.44784	1		0.99711	0.74163	1	0.19738	0.44784	1
	Sod1	1119	2.12218	9.63e-05	0.001604		0.88437	0.92312	1	0.0016913	9.63e-05	0.001604			Sod1	552	-0.276313	0.00032178	0.001022		0.19629	0.00032178	0.001022	0.99216	1	1
	Gm21992	1128	2.23127	2.75e-06	8.1e-05		0.63937	0.80534	1	2.54e-06	2.75e-06	8.1e-05			Gm21992	531	-0.396025	0.002236	0.006502		0.3629	0.002236	0.006502	0.052439	0.084282	1
	Tnrc6c	1131	2.26782	0.0005363	0.006188		0.97461	0.98	1	0.0074315	0.0005363	0.006188			Tnrc6c	1183	1.09163	0.23037	0.697172		0.97059	0.39584	0.697172	0.1174	0.23037	1
	Cpeb4	1134	2.28764	0.0004758	0.005634		0.98876	0.99446	1	0.0067027	0.0004758	0.005634			Cpeb4	819	0.447756	0.96892	0.250006		0.87329	0.11778	0.250006	0.77136	0.96892	1
	Dcp2	1135	2.30055	1.38e-05	0.000243		0.79103	0.86999	1	0.00076665	1.38e-05	0.000243			Dcp2	1143	0.994125	0.53491	0.599415		0.96161	0.33334	0.599415	0.24701	0.53491	1
	Gm21304	1138	2.32509	0.0021315	0.020739		0.89476	0.9274	1	0.016667	0.0021315	0.020739			Gm21304	396	-1.83787	2.7503e-06	1e-05		0.0055595	2.7503e-06	1e-05	0.97808	0.99986	1
	Exosc10	1140	2.35745	8.25e-06	0.00016		0.99908	0.99976	1	0.00031687	8.25e-06	0.00016			Exosc10	405	-1.70869	2.7503e-06	1e-05		0.029165	2.7503e-06	1e-05	0.99825	1	1
	Naa38	1141	2.36582	0.0015319	0.01622		0.62725	0.79711	1	0.012254	0.0015319	0.01622			Naa38	416	-1.623	2.7503e-06	1e-05		0.00086857	2.7503e-06	1e-05	0.95509	0.99917	1
	Lsm12	1146	2.39509	8.25e-06	0.00016		0.98802	0.99408	1	0.00022011	8.25e-06	0.00016			Lsm12	694	0.203125	0.62663	0.111806		0.76499	0.047269	0.111806	0.32622	0.62663	1
	Dhx35	1148	2.42418	5.23e-05	0.000887		0.88793	0.92313	1	0.0015565	5.23e-05	0.000887			Dhx35	666	0.120819	0.62663	0.040565		0.60107	0.015437	0.040565	0.32257	0.62663	1
	Wdr61	1149	2.42764	8.25e-06	0.00016		0.9919	0.99624	1	0.00032489	8.25e-06	0.00016			Wdr61	408	-1.68569	1.3751e-05	4.8e-05		0.070313	1.3751e-05	4.8e-05	0.52662	0.84791	1
	Sarnp	1150	2.43345	1.38e-05	0.000243		0.91765	0.94138	1	0.00085968	1.38e-05	0.000243			Sarnp	1000	0.738938	0.77798	0.139439		0.78923	0.060424	0.139439	0.47471	0.77798	1
	Api5	1151	2.43618	8.25e-06	0.00016		0.12402	0.27986	1	0.00042013	8.25e-06	0.00016			Api5	481	-0.848438	2.7503e-06	1e-05		0.010606	2.7503e-06	1e-05	0.81596	0.97789	1
	Nhp2	1160	2.55309	0.00016777	0.002672		0.99663	0.99879	1	0.0019084	0.00016777	0.002672			Nhp2	395	-1.84344	2.7503e-06	1e-05		0.00089781	2.7503e-06	1e-05	0.9991	1	1
	Rbm19	1162	2.55873	0.0004703	0.005634		0.84056	0.90031	1	0.0065694	0.0004703	0.005634			Rbm19	406	-1.70806	2.7503e-06	1e-05		0.0023887	2.7503e-06	1e-05	0.98759	0.99998	1
	Ddx39	1163	2.56636	2.75e-06	8.1e-05		0.99916	0.9998	1	1.2e-05	2.75e-06	8.1e-05			Ddx39	883	0.54375	0.8444	1		0.99709	0.74163	1	0.52207	0.8444	1
	Ldha	1164	2.58473	0.00056931	0.006445		0.88519	0.91919	1	0.0056457	0.00056931	0.006445			Ldha	448	-1.18806	2.7503e-06	1e-05		0.00030702	2.7503e-06	1e-05	0.027441	0.051994	1
	Eif4e2	1165	2.60382	0.00034928	0.004459		0.98327	0.99027	1	0.0043473	0.00034928	0.004459			Eif4e2	904	0.586313	0.16652	0.103974		0.75022	0.043149	0.103974	0.082359	0.16652	1
	Dazap1	1166	2.62382	8.25e-06	0.00016		0.98146	0.98859	1	0.00034455	8.25e-06	0.00016			Dazap1	669	0.126012	0.21495	0.140736		0.79026	0.061449	0.140736	0.11143	0.21495	1
	Edc3	1169	2.68145	2.75e-06	8.1e-05		0.99399	0.99711	1	6.16e-06	2.75e-06	8.1e-05			Edc3	1204	1.15825	0.76754	0.874722		0.98275	0.52046	0.874722	0.47096	0.76754	1
	Gle1	1170	2.68182	0.00025578	0.003774		0.99968	0.99995	1	0.0025005	0.00025578	0.003774			Gle1	429	-1.39512	2.7503e-06	1e-05		0.035227	2.7503e-06	1e-05	0.89988	0.9939	1
	Syf2	1171	2.68636	0.00063531	0.007103		0.98469	0.99224	1	0.0087069	0.00063531	0.007103			Syf2	404	-1.71994	2.7503e-06	1e-05		0.024295	2.7503e-06	1e-05	0.56799	0.87463	1
	Spen	1172	2.69455	8.25e-06	0.00016		0.9859	0.99279	1	0.00055358	8.25e-06	0.00016			Spen	515	-0.521081	0.0014989	0.004467		0.32559	0.0014989	0.004467	0.44883	0.72112	1
	Ddx17	1173	2.69764	2.75e-06	8.1e-05		0.9988	0.99963	1	7.44e-05	2.75e-06	8.1e-05			Ddx17	1052	0.812188	0.5547	1		0.99948	0.90973	1	0.27633	0.5547	1
	G3bp1	1177	2.72018	8.25e-06	0.00016		0.99995	1	1	0.00048909	8.25e-06	0.00016			G3bp1	1024	0.775188	0.1989	1		0.99824	0.79355	1	0.092595	0.1989	1
	Zfp36	1178	2.72709	2.75e-06	8.1e-05		0.99723	0.99904	1	4.32e-05	2.75e-06	8.1e-05			Zfp36	782	0.388856	0.92156	0.008941		0.37735	0.0030996	0.008941	0.66566	0.92156	1
	Srsf11	1179	2.73655	2.75e-06	8.1e-05		0.91373	0.93995	1	6.14e-06	2.75e-06	8.1e-05			Srsf11	643	0.0531831	0.99428	0.021802		0.51526	0.0078245	0.021802	0.90192	0.99428	1
	Pelo	1181	2.76818	8.25e-06	0.00016		0.99959	0.99995	1	0.0001414	8.25e-06	0.00016			Pelo	482	-0.835375	1.9252e-05	6.5e-05		0.10014	1.9252e-05	6.5e-05	0.94122	0.99841	1
	Keap1	1187	2.84964	2.75e-06	8.1e-05		0.99997	1	1	2.63e-06	2.75e-06	8.1e-05			Keap1	921	0.61195	0.44784	0.16724		0.81716	0.07563	0.16724	0.20404	0.44784	1
	Srsf6	1192	2.888	2.75e-06	8.1e-05		0.98043	0.98737	1	0.00010555	2.75e-06	8.1e-05			Srsf6	656	0.0963375	0.10066	0.356331		0.91556	0.17757	0.356331	0.056666	0.10066	1
	Eloa	1193	2.90218	8.25e-06	0.00016		0.78386	0.86689	1	0.00027336	8.25e-06	0.00016			Eloa	457	-1.12056	2.7503e-06	1e-05		0.0017556	2.7503e-06	1e-05	0.93759	0.99817	1
	Hexim1	1202	3.06727	2.75e-06	8.1e-05		0.99748	0.99911	1	2.34e-05	2.75e-06	8.1e-05			Hexim1	908	0.593619	0.45958	0.871394		0.98199	0.51606	0.871394	0.20645	0.45958	1
	Dcp1a	1203	3.06909	0.00010726	0.001755		0.99955	0.99994	1	0.0017656	0.00010726	0.001755			Dcp1a	918	0.609206	0.89661	1		0.99974	0.93705	1	0.60383	0.89661	1
	Slbp	1205	3.09109	2.48e-05	0.000428		0.81521	0.88236	1	0.0012029	2.48e-05	0.000428			Slbp	816	0.442537	0.62663	0.001433		0.22398	0.0004538	0.001433	0.32984	0.62663	1
	Ranbp2	1208	3.11782	0.00010726	0.001755		0.83799	0.9003	1	0.0017694	0.00010726	0.001755			Ranbp2	463	-1.03287	2.7503e-06	1e-05		0.00016753	2.7503e-06	1e-05	0.96233	0.99941	1
	Irf8	1209	3.14255	2.75e-06	8.1e-05		1	1	1	2.73e-07	2.75e-06	8.1e-05			Irf8	1284	1.68662	0.1989	1		1	0.99847	1	0.099361	0.1989	1
	Spi1	1210	3.17818	2.75e-06	8.1e-05		0.99926	0.99983	1	9.87e-05	2.75e-06	8.1e-05			Spi1	691	0.197	0.9918	0.487113		0.94017	0.26385	0.487113	0.88953	0.9918	1
	Fam46c	1217	3.28109	2.75e-06	8.1e-05		0.9985	0.9995	1	1.26e-07	2.75e-06	8.1e-05			Fam46c	1296	1.99262	0.10067	1		1	0.99908	1	0.063673	0.10067	1
	Thoc7	1219	3.34855	8.25e-06	0.00016		0.95066	0.96422	1	0.00019631	8.25e-06	0.00016			Thoc7	428	-1.39556	2.7503e-06	1e-05		0.0015317	2.7503e-06	1e-05	0.89666	0.99308	1
	Xpo5	1221	3.41491	8.25e-06	0.00016		0.99612	0.99861	1	0.00016163	8.25e-06	0.00016			Xpo5	443	-1.21944	2.7503e-06	1e-05		0.02193	2.7503e-06	1e-05	0.99575	1	1
	Luc7l3	1222	3.428	1.38e-05	0.000243		0.56665	0.75844	1	0.00096852	1.38e-05	0.000243			Luc7l3	419	-1.5475	2.7503e-06	1e-05		0.012643	2.7503e-06	1e-05	0.52473	0.8479	1
	Nupl2	1226	3.48418	2.75e-06	8.1e-05		0.99997	1	1	4.74e-05	2.75e-06	8.1e-05			Nupl2	1027	0.781375	0.96498	0.862261		0.98095	0.50682	0.862261	0.76358	0.96498	1
	Tcerg1	1227	3.50091	2.75e-06	8.1e-05		0.58413	0.7672	1	9.83e-06	2.75e-06	8.1e-05			Tcerg1	776	0.376256	0.86176	0.174547		0.81973	0.079128	0.174547	0.55243	0.86176	1
	Bcl6	1233	3.62655	2.75e-06	8.1e-05		0.99996	1	1	3.77e-08	2.75e-06	8.1e-05			Bcl6	541	-0.347356	0.0018674	0.00552		0.34115	0.0018674	0.00552	0.93561	0.99801	1
	Ipo5	1234	3.63782	2.75e-06	8.1e-05		0.70296	0.85289	1	7.26e-08	2.75e-06	8.1e-05			Ipo5	940	0.642875	0.70835	0.884608		0.98387	0.5342	0.884608	0.42362	0.70835	1
	Cnot10	1235	3.64927	8.25e-06	0.00016		0.46775	0.67304	1	0.00025753	8.25e-06	0.00016			Cnot10	615	-0.0658562	0.00055831	0.001739		0.25126	0.00055831	0.001739	0.45487	0.73334	1
	Cnot11	1240	3.73091	2.75e-06	8.1e-05		0.86163	0.91396	1	1.63e-05	2.75e-06	8.1e-05			Cnot11	411	-1.6775	0.00012926	0.000422		0.13715	0.00012926	0.000422	0.63727	0.91318	1
	Rbm33	1241	3.75836	2.75e-06	8.1e-05		0.99891	0.99967	1	7.7e-07	2.75e-06	8.1e-05			Rbm33	446	-1.20037	2.7503e-06	1e-05		0.0032829	2.7503e-06	1e-05	0.76257	0.96498	1
	Pdia3	1242	3.81345	2.75e-06	8.1e-05		1	1	1	4.47e-07	2.75e-06	8.1e-05			Pdia3	1165	1.04119	0.5145	0.442067		0.93038	0.23037	0.442067	0.23195	0.5145	1
	Srpk1	1251	3.99618	2.75e-06	8.1e-05		0.74716	0.8575	1	1.32e-05	2.75e-06	8.1e-05			Srpk1	486	-0.817688	1.3751e-05	4.8e-05		0.075675	1.3751e-05	4.8e-05	0.035361	0.067698	1
	Eif3k	1254	4.08018	2.75e-06	8.1e-05		1	1	1	5.72e-08	2.75e-06	8.1e-05			Eif3k	612	-0.0717437	0.0014989	0.004467		0.32395	0.0014989	0.004467	0.91138	0.99604	1
	Serbp1	1256	4.09673	2.75e-06	8.1e-05		0.83034	0.89577	1	3.35e-06	2.75e-06	8.1e-05			Serbp1	787	0.401181	0.92733	0.294378		0.8951	0.14196	0.294378	0.67843	0.92733	1
	Eif1ax	1258	4.12491	2.75e-06	8.1e-05		0.91422	0.93996	1	3.8e-07	2.75e-06	8.1e-05			Eif1ax	1032	0.789062	0.60945	0.697172		0.97052	0.39584	0.697172	0.30568	0.60945	1
	Ptprc	1259	4.13745	2.75e-06	8.1e-05		0.99934	0.99986	1	2.09e-06	2.75e-06	8.1e-05			Ptprc	667	0.1241	0.98886	0.054603		0.64473	0.021356	0.054603	0.87173	0.98886	1
	Hnrnpc	1263	4.402	1.38e-05	0.000243		0.99998	1	1	0.0005958	1.38e-05	0.000243			Hnrnpc	391	-1.85794	2.7503e-06	1e-05		0.0011236	2.7503e-06	1e-05	0.95229	0.99914	1
	Pnkp	1265	4.69509	2.75e-06	8.1e-05		1	1	1	1.62e-09	2.75e-06	8.1e-05			Pnkp	671	0.130544	0.9738	0.268051		0.87972	0.12718	0.268051	0.80073	0.9738	1
	Rbm15	1267	4.73236	2.75e-06	8.1e-05		0.99863	0.99951	1	4.51e-08	2.75e-06	8.1e-05			Rbm15	703	0.221962	0.91756	0.06161		0.67198	0.024365	0.06161	0.65014	0.91756	1
	Elavl1	1270	5.06618	2.75e-06	8.1e-05		1	1	1	1.35e-08	2.75e-06	8.1e-05			Elavl1	661	0.108406	0.95857	0.023955		0.52738	0.0086771	0.023955	0.74146	0.95857	1
	Ddx39b	1272	5.12727	2.75e-06	8.1e-05		0.87305	0.91705	1	3.01e-08	2.75e-06	8.1e-05			Ddx39b	427	-1.39931	2.7503e-06	1e-05		0.010301	2.7503e-06	1e-05	0.83664	0.98151	1
	Eif3l	1280	5.57436	2.75e-06	8.1e-05		0.93151	0.95301	1	7.77e-08	2.75e-06	8.1e-05			Eif3l	520	-0.4674	0.0004758	0.001489		0.2401	0.0004758	0.001489	0.79652	0.97309	1
	Dnmt1	1283	5.87455	2.75e-06	8.1e-05		0.99987	0.99999	1	2.41e-07	2.75e-06	8.1e-05			Dnmt1	420	-1.53563	2.7503e-06	1e-05		0.011801	2.7503e-06	1e-05	0.97427	0.99976	1
	Pten	1285	6.81618	2.75e-06	8.1e-05		0.99587	0.99846	1	2.91e-08	2.75e-06	8.1e-05			Pten	1219	1.20694	0.89661	1		0.99632	0.72676	1	0.60415	0.89661	1
	Tnrc6a	1287	7.33764	2.75e-06	8.1e-05		0.85538	0.91251	1	7.07e-12	2.75e-06	8.1e-05			Tnrc6a	1088	0.888813	0.6876	1		0.9993	0.88977	1	0.41499	0.6876	1
	Rbm14	1288	7.37764	2.75e-06	8.1e-05		1	1	1	3.36e-11	2.75e-06	8.1e-05			Rbm14	905	0.586987	0.6876	0.893002		0.98559	0.5482	0.893002	0.41407	0.6876	1
	Hist1h1d	1290	7.86909	2.75e-06	8.1e-05		0.9767	0.98224	1	4.15e-08	2.75e-06	8.1e-05			Hist1h1d	507	-0.597562	0.00095435	0.002917		0.28068	0.00095435	0.002917	0.70141	0.93778	1
	Ikzf1	1291	8.25073	2.75e-06	8.1e-05		1	1	1	1.75e-11	2.75e-06	8.1e-05			Ikzf1	900	0.579475	0.1989	0.02754		0.55171	0.010052	0.02754	0.098011	0.1989	1
	Ddx5	1292	8.26909	2.75e-06	8.1e-05		1	1	1	5.87e-16	2.75e-06	8.1e-05			Ddx5	456	-1.12287	2.7503e-06	1e-05		0.034674	2.7503e-06	1e-05	0.94959	0.99896	1
	Eif3j1	1293	8.41709	2.75e-06	8.1e-05		0.99949	0.99992	1	2.37e-10	2.75e-06	8.1e-05			Eif3j1	567	-0.2197	0.0045297	0.01276		0.46053	0.0045297	0.01276	0.13382	0.27669	1
	Dynll1	1294	9.14582	2.75e-06	8.1e-05		1	1	1	1.23e-16	2.75e-06	8.1e-05			Dynll1	534	-0.380138	0.0021975	0.006411		0.35716	0.0021975	0.006411	0.87185	0.98887	1
	Ddx6	1295	9.45418	2.75e-06	8.1e-05		1	1	1	4.57e-15	2.75e-06	8.1e-05			Ddx6	1059	0.827438	0.78813	0.139268		0.78851	0.060272	0.139268	0.48008	0.78813	1
	Tardbp	1296	9.62891	2.75e-06	8.1e-05		0.99213	0.99625	1	8.52e-15	2.75e-06	8.1e-05			Tardbp	469	-0.977437	2.7503e-06	1e-05		0.020376	2.7503e-06	1e-05	0.79061	0.97233	1
	Cnot9	1297	10.09	2.75e-06	8.1e-05		0.99356	0.99664	1	3.04e-16	2.75e-06	8.1e-05			Cnot9	501	-0.676187	8.5259e-05	0.000284		0.12255	8.5259e-05	0.000284	0.97571	0.99979	1
	Bach2	1298	13.5447	2.75e-06	8.1e-05		0.45835	0.66559	1	5.39e-21	2.75e-06	8.1e-05			Bach2	769	0.365781	0.79744	0.321551		0.90459	0.15684	0.321551	0.48581	0.79744	1
	Stat3	1299	14.7225	2.75e-06	8.1e-05		0.7173	0.85289	1	2.01e-18	2.75e-06	8.1e-05			Stat3	529	-0.3997	8.2508e-06	3e-05		0.050673	8.2508e-06	3e-05	0.2184	0.49326	1

## Sheet: 1F - antibodies
Antigen	Alternative	Clone	Concentration	Dilution	Source	Isotype
CD4		RM4-5	0.5μg/ml	400	BioLegend	Rat IgG2b, κ
CD8		53-6.7	0.5μg/ml	400	BioLegend	Rat IgG2a, κ
CD19		1D3	0.5μg/ml	400	BioLegend	Rat IgG2a, κ
CD38		90	2μg/ml	100	BioLegend	Rat IgG2a, κ
CD45.1		A20	0.5μg/ml	400	BD	Mouse IgG2a, κ
CD45.2		104	0.5μg/ml	400	BioLegend	Mouse IgG2a, κ
CD45R	B220	RA3-6B2	0.5μg/ml	400	BioLegend	Rat IgG2a, κ
CD86		GL-1	1μg/ml	200	BioLegend	Rat IgG2a, κ
CD90.1	Thy1.1	Ox-7	0.25μg/ml	800	BioLegend	Mouse IgG1, κ
CD95	FAS	Jo2	2μg/ml	100	BD	Armenian Hamster IgG2, λ2
CD138	Syndecan 1	281-2	1μg/ml	200	BioLegend	Rat IgG2a, κ
CD184	CXCR4	2B11	4μg/ml	50	BD	Rat IgG2b, κ
CD267	TACI	ebio8F10-3	1μg/ml	200	BD	Rat IgG2a, κ
GFP		FM264G	0.5μg/ml	400	BioLegend	Rat IgG2a, κ
IgD		11-26c.2a	0.5μg/ml	400	BioLegend	Rat IgG2a, κ
IgE		R35-72	0.5μg/ml	400	BD	Rat IgG1
IgG1		X56	0.5μg/ml	400	BD	Rat IgG1
IgM		R6-60.2	0.5μg/ml	400	BioLegend	Rat IgG2a, κ
IRF4		3E4	1μg/ml	200	eBioscience	Rat IgG1, κ
Blimp1		6D3	1μg/ml	200	BD	Rat IgG2a, κ
