# Supplementary figures and images for: A functional screen of RNA binding proteins identifies genes that promote or limit the accumulation of CD138+ plasma cells
Source: eLife journal article supplement (doi:10.7554/elife.72313), 2022-04-22

Figure 3 - figure supplement 1

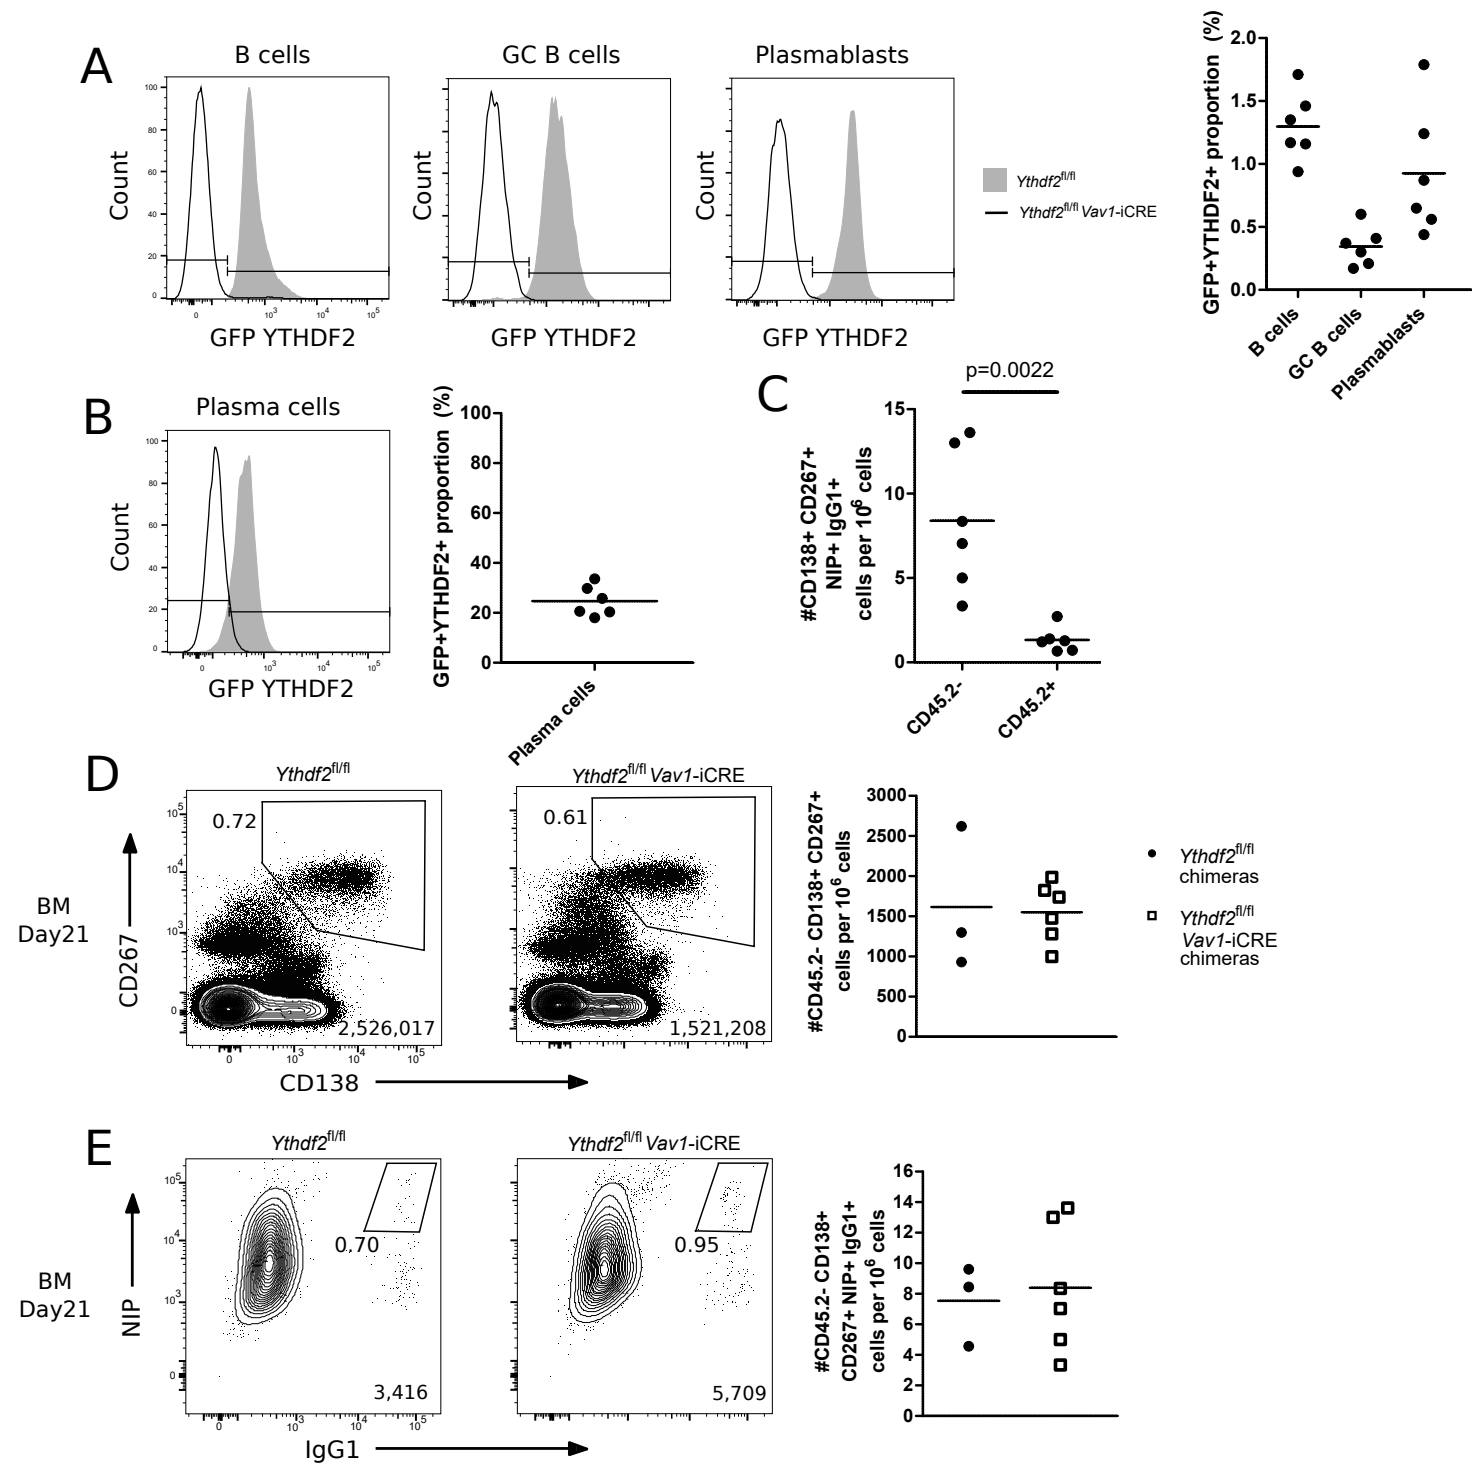

Supplement: supp [file elife-72313-supp-v1.zip]

Figure 2 - figure supplement 1

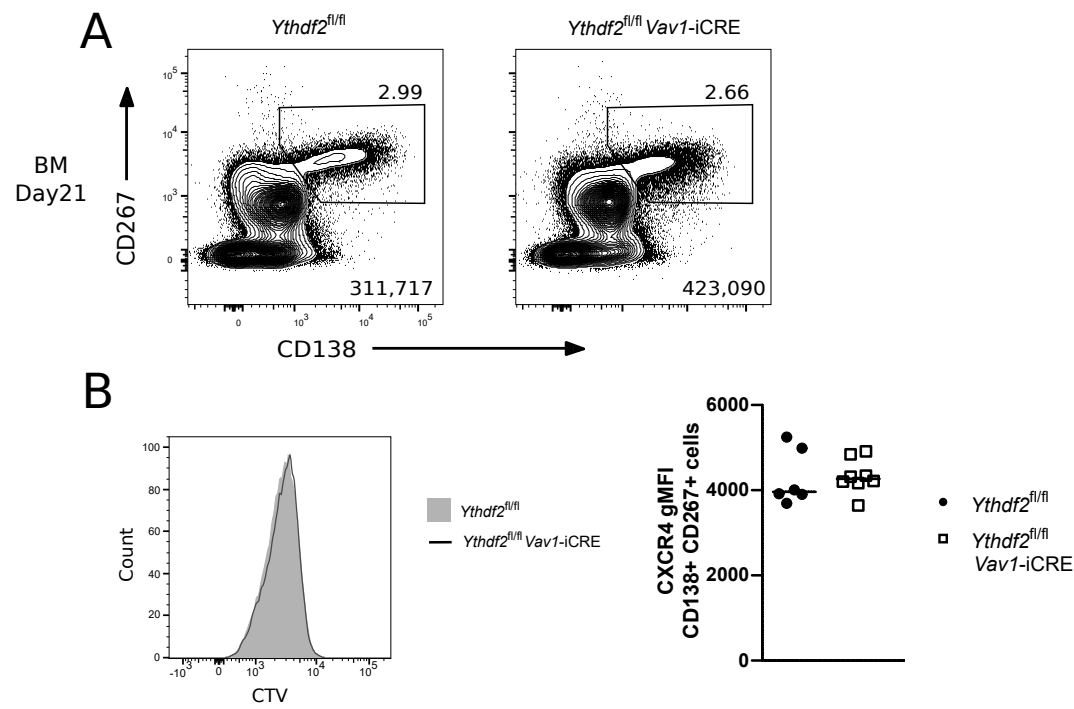

Supplement: supp [file elife-72313-supp-v1.zip]

Figure 1 - figure supplement 1

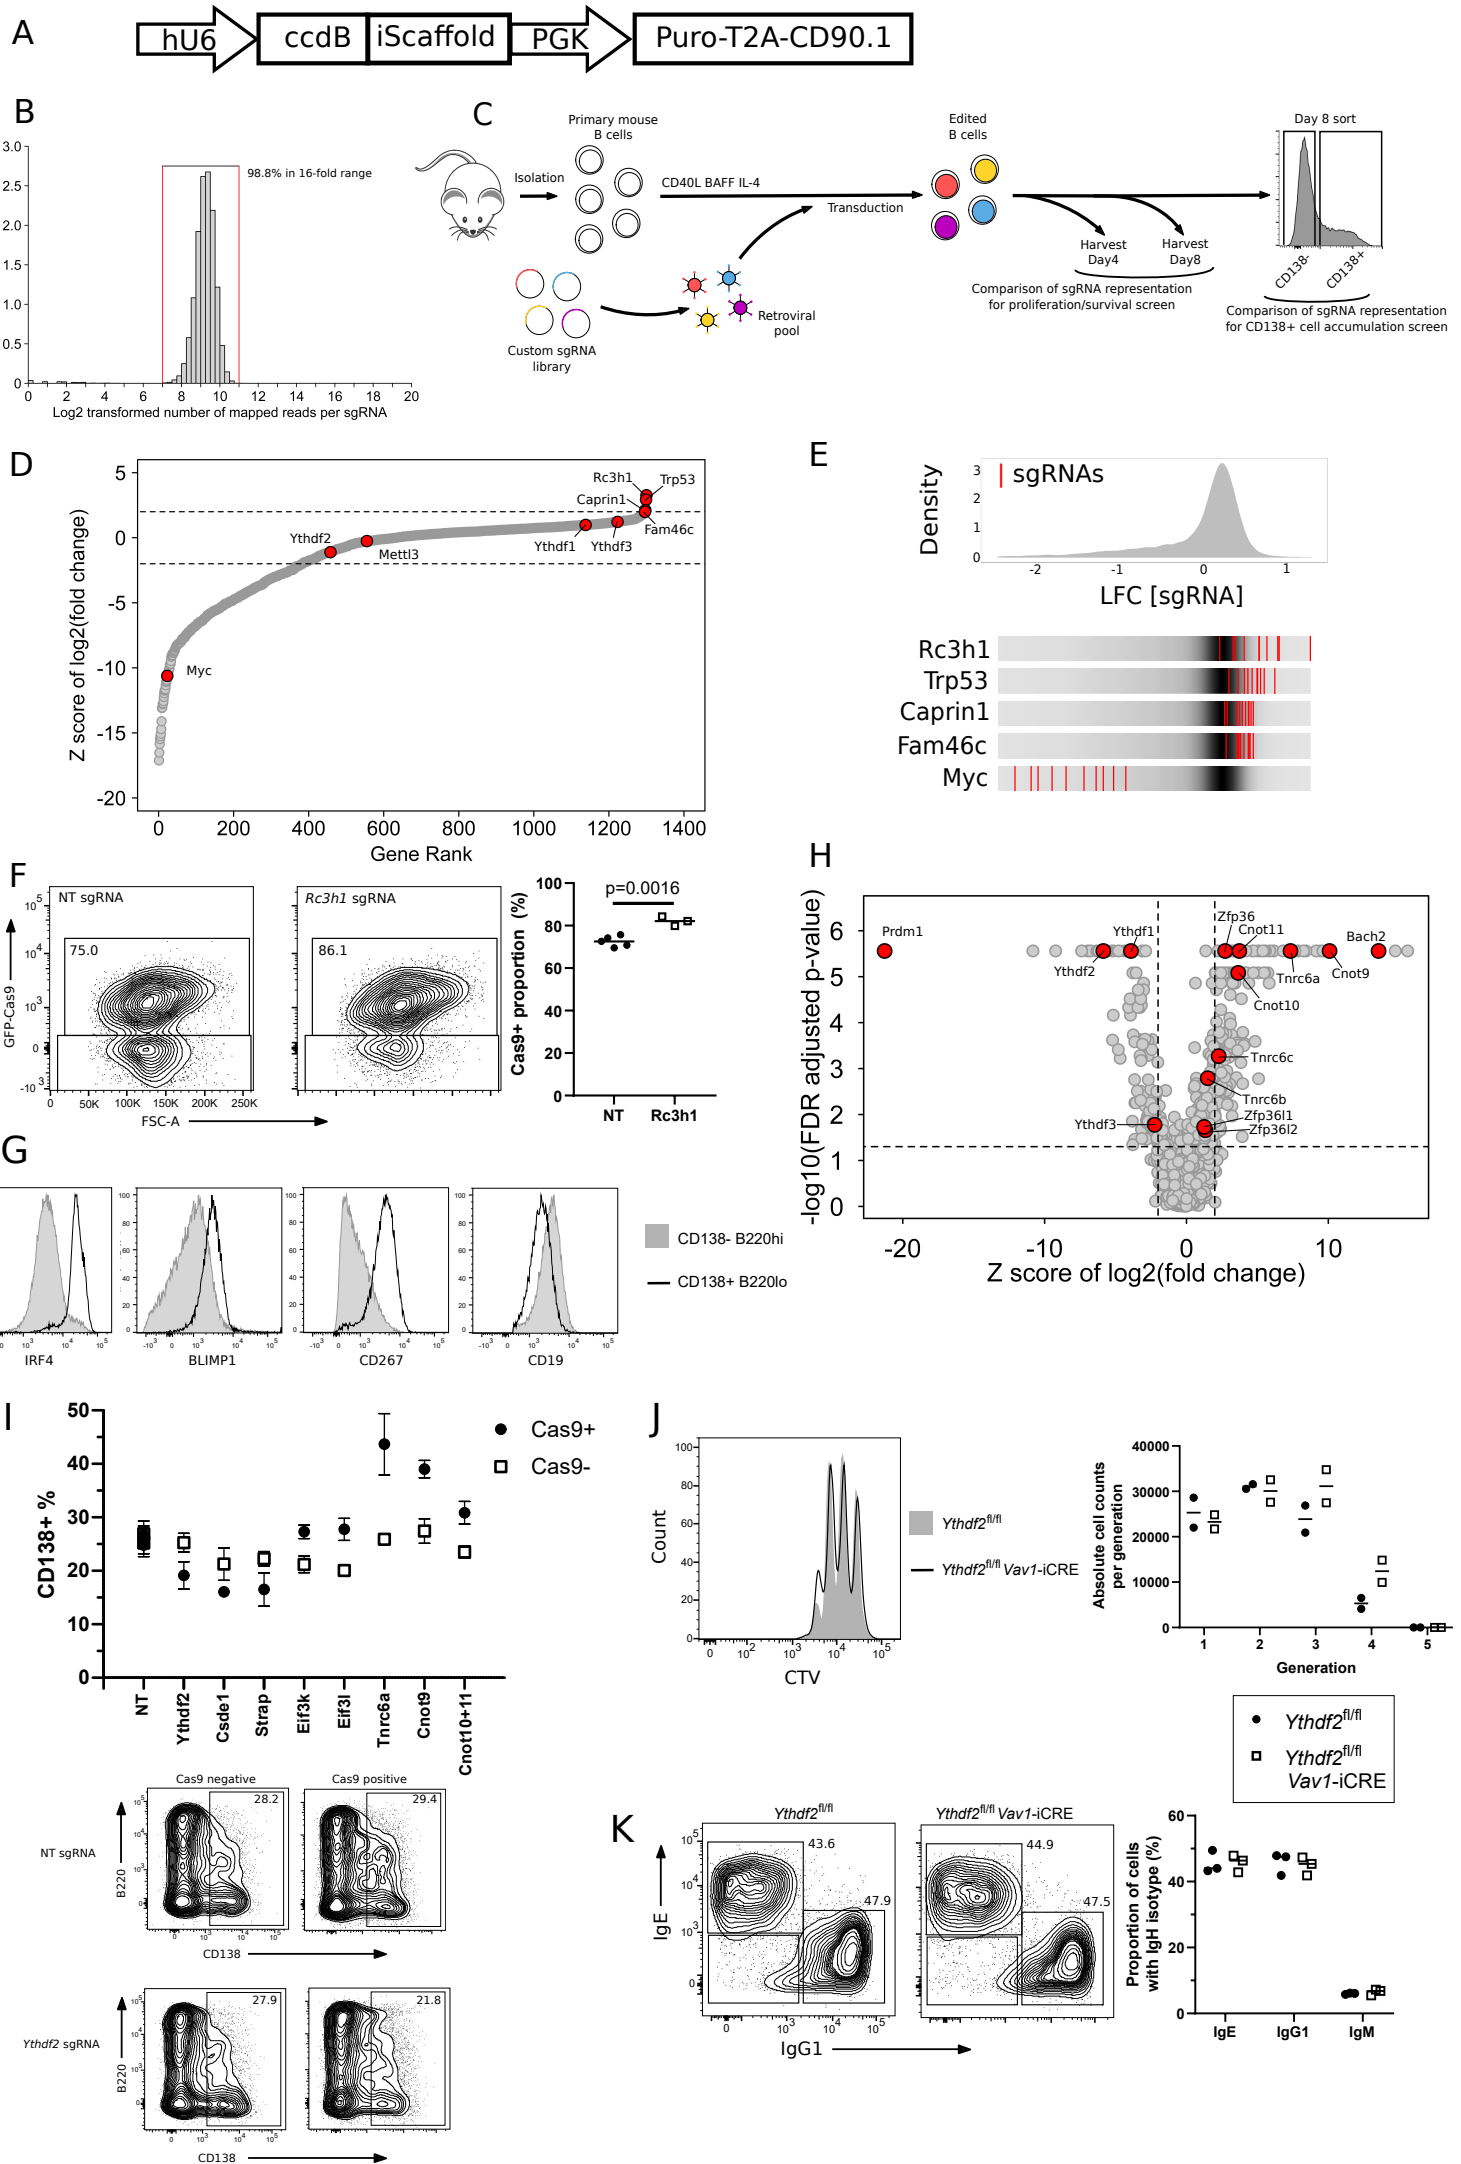

Supplement: supp [file elife-72313-supp-v1.zip]
